# Supplementary material for: Access to diverse primary, secondary, and tertiary amines via the merger of controllable cleavage of triazines and site-selective functionalization
Source: Royal Society of Chemistry journal article supplement (doi:10.1039/d1qo00883h), 2021-01-01
Supplement: d1qo00883h1.pdf [file d1qo00883h1.pdf]

Supporting Information

**Access to Diverse Primary, Secondary, and Tertiary Amines *via* the Merger  
of Controllable Cleavage of Triazines and Site-Selective Functionalization**

Yuhan Wang,<sup>1</sup> Huitao Zheng,<sup>1</sup> Jiajia Xu,<sup>1</sup> Canzhan Zhuang,<sup>1</sup> Xiang Liu\*,<sup>1</sup> and Hua Cao\*<sup>1</sup>

<sup>1</sup> Guangdong Cosmetics Engineering & Technology Research Center, School of Chemistry and Chemical Engineering, Guangdong Pharmaceutical University, Zhongshan 528458, China

**Table of Contents:**

---

|                                                      |      |
|------------------------------------------------------|------|
| 1. General considerations                            | S2   |
| 2. Experimental procedures and characterization data | S3   |
| 2.1 <i>Experimental procedures</i>                   | S3   |
| 2.2 <i>Characterization data</i>                     | S6   |
| 3. NMR spectra for new compounds                     | S33  |
| 4. X-ray crystallographic data                       | S113 |
| 5. References                                        | S121 |

---

## 1. General considerations

Unless otherwise noted, commercial reagents were purchased from Alfa Aesar, TCI, *J&K* or Adamas and used without further purification. All reactions were carried out using oven-dried glassware and all catalytic reactions proceeded without special care. Column chromatography was performed on 200-300 mesh silica gel (Huanghai, China).

$^1\text{H}$ ,  $^{19}\text{F}$  and  $^{13}\text{C}\{^1\text{H}\}$  NMR spectra were recorded on an Bruker Ascend 400MHz spectrometer and Bruker Ultrashield 300MHz at ambient temperature.  $^1\text{H}$  NMR spectra are referred to the TMS signal ( $\delta = 0$  ppm) and  $^{13}\text{C}$  NMR spectra are referred to the residual solvent signal ( $\delta = 77.16$  ppm). Data for  $^1\text{H}$  NMR are reported as follows: chemical shifts ( $\delta$  ppm), multiplicities (s = singlet, d = doublet, t = triplet, q = quartet, m = multiplet, br = broad), coupling constants (Hz), integration.

The data of HRMS was carried out on a waters G2-XS high-resolution mass spectrometer (HR-ESI-MS).

Melting point were recorded using a SGW X-4 Melting Point Apparatus.

## 2. Experimental procedures and characterization data

### 2.1 Experimental procedures

#### Synthesis of compounds 1 according to the following procedure<sup>1</sup>:

As exemplified for 2-phenylimidazo[1,2-*a*]pyridine:

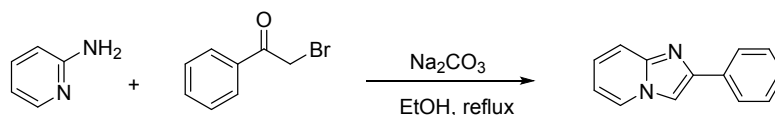

Pyridin-2-amine (9.41 g, 100 mmol) was dissolved in C<sub>2</sub>H<sub>5</sub>OH (20.0 mL) and then Na<sub>2</sub>CO<sub>3</sub> (21.2 g, 200 mmol) and 2-bromo-1-phenylethan-1-one (25.7 g, 130 mmol) were added, respectively. The reaction mixture was refluxed for 20 h, then cooled to room temperature, and the solvent was removed to afford an oily residue. The water (100 mL) was added into residue. The aqueous solution was extracted with EtOAc (3×30.0 mL) and the combined extract was dried with anhydrous MgSO<sub>4</sub>. The solvent was removed and the crude product was separated by column chromatography (eluted with petroleum ether : ethyl acetate=1:1) to give a pure sample of 2-phenylimidazo[1,2-*a*]pyridine.

#### Synthesis of compounds 2 according to the following procedure<sup>2</sup>:

As exemplified for 1,3,5-triphenyl-1,3,5-triazinane:

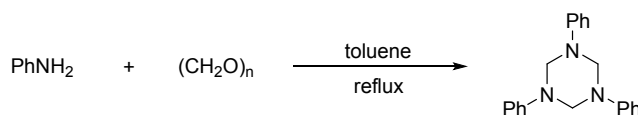

In a 100 mL round-bottomed flask equipped with a Dean-Stark apparatus, a mixture of aniline (2.79 g, 30.0 mmol), paraformaldehyde (33.0 mmol), and toluene (50.0 mL) was heated with refluxing for 2 h. Then the solvent was concentrated under reduced pressure at 50 °C, a precipitate came out from the mixture. The precipitate was collected by filtration, washed with n-hexane several times, and dried to obtain 1,3,5-triazinane. All the triazinane substrates did not need to be further purified and proceed directly to the next step.

#### Synthesis of product 3 according to the following procedure:

As exemplified for **3a**:

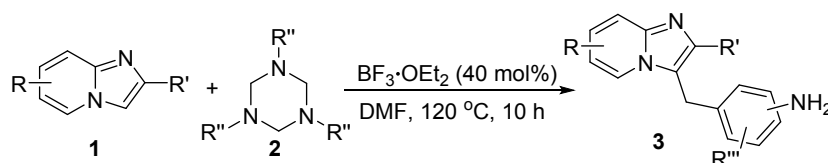

A pressure tube was charged with 2-phenylimidazo[1,2-*a*]pyridine (**1a**, 58.2 mg, 0.3 mmol), 1,3,5-triphenyl-

1,3,5-triazinane (**2a**, 142 mg, 0.45 mmol) and DMF (3.0 mL).  $\text{BF}_3 \cdot \text{OEt}_2$  (17.0 mg, 0.12 mmol) was added and the mixtures were heated with a heating mantle at 120 °C for 10 h, then cooled to room temperature and the water (10.0 mL) was added. The aqueous solution was extracted with ethyl acetate ( $3 \times 10.0$  mL) and washed by water twice. After the combined extract was dried with anhydrous  $\text{MgSO}_4$ , the solvent was volatilized. Finally, the crude product was separated by column chromatography (petroleum ethyl: ether acetate = 1: 1) to give a pure sample of **3a** in 78% yield (70.0 mg).

### Synthesis of product 4 according to the following procedure:

As exemplified for **4a**:

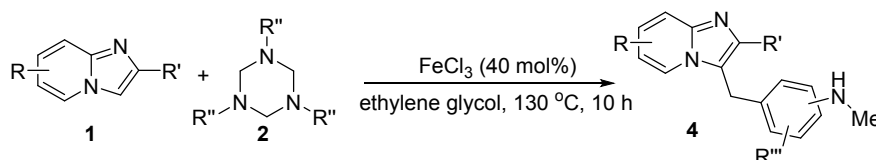

A pressure tube with 3.0 mL ethylene glycol was charged with a stirring bar, and  $\text{FeCl}_3$  (19.4 mg, 0.12 mmol), 2-phenylimidazo[1,2-*a*]pyridine (**1a**, 58.2 mg, 0.3 mmol), 1,3,5-triphenyl-1,3,5-triazinane (**2a**, 142 mg, 0.45 mmol) were added. The reaction was heated with a heating mantle at 130 °C for 10 h, then cooled to room temperature. The aqueous solution was extracted with DCM ( $3 \times 10.0$  mL) and the solvent was volatilized. The crude product was separated by preparative TLC (petroleum ethyl: ether acetate = 2: 1) to give a pure sample of **4a** in 48% yield (45.1 mg).

### Synthesis of product 5 according to the following procedure:

As exemplified for **5a**:

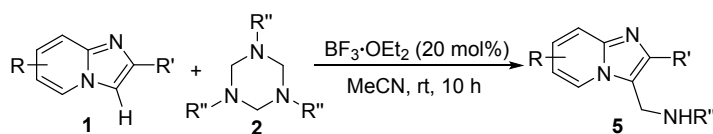

A pressure tube was charged with 2-phenylimidazo[1,2-*a*]pyridine (**1a**, 58.2 mg, 0.3 mmol), 1,3,5-triphenyl-1,3,5-triazinane (**2a**, 142 mg, 0.45 mmol) and MeCN (3.0 mL).  $\text{BF}_3 \cdot \text{OEt}_2$  (8.50 mg, 0.06 mmol) was added and the mixtures was allowed to stir at room temperature for 10 h, then cooled to room temperature. The solvent was volatilized and the crude product was separated by column chromatography (petroleum ethyl: ether acetate = 2: 1) to give a pure sample of **5a** in 86% yield (77.2 mg).



### Synthesis of product 7 and 8 according to the following procedure:

As exemplified for **7a** and **8a**:

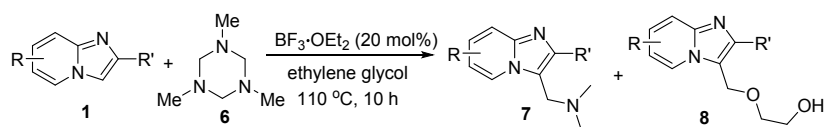

A pressure tube was charged with 2-phenylimidazo[1,2-*a*]pyridine (**1a**, 58.2 mg, 0.3 mmol), 1,3,5-trimethyl-1,3,5-triazinane (**6**, 58.1 mg, 0.45 mmol) and toluene (3.0 mL).  $\text{BF}_3 \cdot \text{OEt}_2$  (8.50 mg, 0.06 mmol) was added and the mixture was allowed to stir at room temperature for 10 h, then cooled to room temperature and the water (10.0 mL) was added. The aqueous solution was extracted with DCM ( $3 \times 10.0$  mL) and the solvent was volatilized. The crude product was separated by preparative TLC (petroleum ethyl: ether acetate = 1: 2) to give a pure sample of **7a** in 48% yield (36.2 mg) and **8a** in 44% yield (35.4 mg), respectively.

### Large-scale reaction for 3a:

A pressure tube was charged with 2-phenylimidazo[1,2-*a*]pyridine (**1a**, 582 mg, 3.0 mmol), 1,3,5-triphenyl-1,3,5-triazinane (**2a**, 1.42 g, 4.5 mmol) and DMF (20.0 mL).  $\text{BF}_3 \cdot \text{OEt}_2$  (170.4 mg, 1.2 mmol) was added and the mixture was heated with a heating mantle at  $120^\circ\text{C}$  for 10 h, then cooled to room temperature and the water (10.0 mL) was added. The aqueous solution was extracted with ethyl acetate ( $3 \times 10.0$  mL) and washed by water twice. After the combined extract was dried with anhydrous  $\text{MgSO}_4$ , the solvent was volatilized. Finally, the crude product was separated by column chromatography (petroleum ethyl: ether acetate = 1: 1) to give a pure sample of **3a** in 72% yield (0.646 g).

### Large-scale reaction for 5a:

A pressure tube was charged with 2-phenylimidazo[1,2-*a*]pyridine (**1a**, 582 mg, 3.0 mmol), 1,3,5-triphenyl-1,3,5-triazinane (**2a**, 1.42 g, 4.5 mmol) and MeCN (20.0 mL).  $\text{BF}_3 \cdot \text{OEt}_2$  (85.2 mg, 0.6 mmol) was added and the mixture was allowed to stir at room temperature for 10 h. The solvent was volatilized and the crude product was separated by column chromatography (petroleum ethyl: ether acetate = 2: 1) to give a pure sample of **5a** in 84% yield (0.754 g).

### Synthesis of product 10a and 10b according to the following procedure:

**9a** (0.330 mmol) or **9b** (0.330 mmol) was dissolved ethyl acetate (2.0 mL) and then DIPEA (0.30 mmol) and BOP (0.30 mmol) was added, the mixture was allowed to stir at room temperature for 5 mins. Then, DIPEA (0.45 mmol) and **3a** (0.30 mmol) were added, respectively. The mixture was allowed to stir at room temperature for 10 h. Finally, the solvent was volatilized and the crude product was separated by column chromatography (petroleum ethyl: ether acetate = 1: 2) to give a pure sample of **10a** in 84% yield (126 mg) or **10b** in 86% yield (125 mg).

#### Synthesis of product **10c**, **10d** and **10f** according to the following procedure:

**3a** (0.30 mmol) was dissolved in *n*-butylalcohol (2.0 mL) and then **9c** (0.60 mmol) or **9d** (0.60 mmol) or **9f** (0.60 mmol) was added. The mixtures were heated with a heating mantle at 160 °C for 1 h. The water (10.0 mL) was added and the aqueous solution was extracted with ethyl acetate (3×10.0 mL). Then, the combined extract was dried with anhydrous MgSO<sub>4</sub>, the solvent was volatilized. Finally, the crude product was separated by column chromatography (petroleum ethyl: ether acetate = 1: 2) to give a pure sample of **10c** in 71% yield (104 mg), **10d** in 65% yield (81.2 mg), **10f** in 65% yield (98.1 mg), respectively.

#### Synthesis of product **10e** according to the following procedure:

To a solution of compound **9e** (0.39 mmol) and **3a** (0.30 mmol) in anhydrous 1,4-dioxane (2.0 mL) was added *t*-BuONa (0.60 mmol), the mixture was bubbled with N<sub>2</sub> for 5 min, then Pd<sub>2</sub>(dba)<sub>3</sub> (0.06 mmol) and Xphos (0.12 mmol) was added, the mixture was further bubbled with N<sub>2</sub> for 5 min, the mixture was heated to 100 °C for 8 h. Subsequently, the resulting solution was filtered through Celite and concentrated. Finally, the residue was purified by column chromatography (petroleum ethyl: ether acetate = 1: 2) to give a pure sample of **10e** in 64% yield (136 mg).

## 2.2 Characterization data

### 4-((2-Phenylimidazo[1,2-*a*]pyridin-3-yl)methyl)aniline (**3a**)

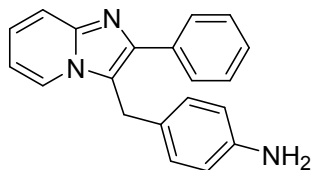

Flash column chromatography on silica gel (eluent: PE/EA = 1/1, v/v) to afford **3a**. Yellow solid (70.0 mg, 78%), mp 106.2-106.8 °C. <sup>1</sup>H NMR (400 MHz, CDCl<sub>3</sub>) δ 7.80 (d, *J* = 6.9 Hz, 2H), 7.73 (d, *J* = 7.0 Hz, 1H), 7.69 (d, *J* = 9.0 Hz, 1H), 7.43 (t, *J* = 7.5 Hz, 2H), 7.35 (t, *J* = 7.4 Hz, 1H), 7.22 – 7.14 (m, 1H),

6.92 (d,  $J = 8.1$  Hz, 2H), 6.71 (t,  $J = 6.8$  Hz, 1H), 6.62 (d,  $J = 8.4$  Hz, 2H), 4.38 (s, 2H), 3.34 (s, 2H).  $^{13}\text{C}$  NMR (100 MHz,  $\text{CDCl}_3$ )  $\delta$  145.4, 144.6, 134.2, 128.8, 128.6, 128.4, 128.0, 126.2, 124.6, 123.8, 118.6, 117.4, 115.8, 112.4, 29.2. HR-ESI-MS ( $m/z$ ): calcd for  $\text{C}_{20}\text{H}_{18}\text{N}_3$  [ $\text{M} + \text{H}$ ] $^+$ : 300.1501, found: 300.1499.

#### 4-((6-Methyl-2-phenylimidazo[1,2-*a*]pyridin-3-yl)methyl)aniline (**3b**)

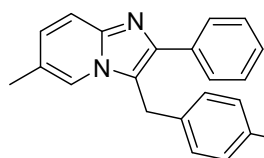

Flash column chromatography on silica gel (eluent: PE/EA = 1/1, v/v) to afford **3b**. Yellow solid (71.4 mg, 76%), mp 136.3-136.9 °C.  $^1\text{H}$  NMR (400 MHz,  $\text{CDCl}_3$ )  $\delta$  7.78 (d,  $J = 7.1$  Hz, 2H), 7.58 (d,  $J = 7.0$  Hz, 1H), 7.46 – 7.37 (m, 3H), 7.32 (t,  $J = 7.3$  Hz, 1H), 6.90 (d,  $J = 8.0$  Hz, 2H), 6.59 (d,  $J = 8.4$  Hz, 2H), 6.50 (d,  $J = 7.0$  Hz, 1H), 4.33 (s, 2H), 3.54 (s, 2H), 2.36 (s, 3H).  $^{13}\text{C}$  NMR (100 MHz,  $\text{CDCl}_3$ )  $\delta$  145.2, 145.2, 143.4, 135.0, 134.8, 128.6, 128.6, 128.2, 127.6, 126.4, 126.4, 122.8, 117.8, 115.6, 114.8, 29.0, 21.4. HR-ESI-MS ( $m/z$ ): calcd for  $\text{C}_{21}\text{H}_{20}\text{N}_3$  [ $\text{M} + \text{H}$ ] $^+$ : 314.1657, found: 314.1657.

#### 4-((7-Methyl-2-phenylimidazo[1,2-*a*]pyridin-3-yl)methyl)aniline (**3c**)

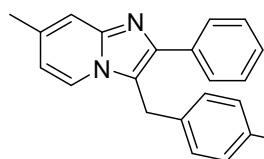

Flash column chromatography on silica gel (eluent: PE/EA = 1/1, v/v) to afford **3c**. Yellow solid (70.5 mg, 75%), mp 130.3-130.9 °C.  $^1\text{H}$  NMR (400 MHz,  $\text{CDCl}_3$ )  $\delta$  7.79 (d,  $J = 8.9$  Hz, 2H), 7.58 (d,  $J = 6.9$  Hz, 1H), 7.41 (t,  $J = 7.6$  Hz, 3H), 7.32 (t,  $J = 7.4$  Hz, 1H), 6.89 (d,  $J = 8.1$  Hz, 2H), 6.59 (d,  $J = 8.1$  Hz, 2H), 6.50 (d,  $J = 6.9$  Hz, 1H), 4.32 (s, 2H), 3.56 (s, 2H), 2.36 (s, 3H).  $^{13}\text{C}$  NMR (100 MHz,  $\text{CDCl}_3$ )  $\delta$  145.2, 145.2, 143.4, 135.0, 134.8, 128.6, 128.6, 128.2, 127.6, 126.4, 122.8, 117.8, 115.8, 115.6, 114.6, 29.0, 21.4. HR-ESI-MS ( $m/z$ ): calcd for  $\text{C}_{21}\text{H}_{20}\text{N}_3$  [ $\text{M} + \text{H}$ ] $^+$ : 314.1657, found: 314.1656.

#### 4-((7-Ethyl-2-phenylimidazo[1,2-*a*]pyridin-3-yl)methyl)aniline (**3d**)

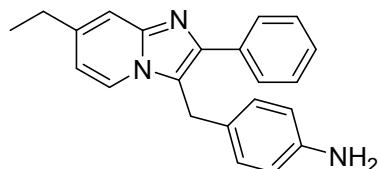

Flash column chromatography on silica gel (eluent: PE/EA = 1/1, v/v) to afford **3d**. Yellow solid (78.5 mg, 80%), mp 160.8-161.2 °C.  $^1\text{H}$  NMR (400 MHz,  $\text{CDCl}_3$ )  $\delta$  7.79 (d,  $J = 7.5$  Hz, 2H), 7.61 (d,  $J = 7.0$  Hz, 1H), 7.43 (dd,  $J = 14.2, 6.9$  Hz, 3H), 7.36 – 7.30 (m, 1H), 6.91 (d,  $J = 7.9$  Hz, 2H), 6.60 (d,  $J = 8.3$  Hz, 2H), 6.55 (d,  $J = 6.8$  Hz, 1H), 4.34 (s, 2H), 3.44 (s, 2H), 2.67 (q,  $J = 7.7$  Hz, 2H), 1.26 (t,  $J = 7.5$  Hz, 3H).  $^{13}\text{C}$  NMR (100 MHz,  $\text{CDCl}_3$ )  $\delta$  145.4, 145.2, 143.4, 141.4, 134.8, 128.6, 128.6,

128.2, 127.6, 126.6, 123.0, 117.8, 115.8, 114.4, 113.8, 29.2, 28.4, 14.6. HR-ESI-MS ( $m/z$ ): calcd for  $C_{22}H_{22}N_3$  [ $M + H$ ] $^+$ : 328.1814, found: 328.1817.

#### 4-((5,7-Dimethyl-2-phenylimidazo[1,2-*a*]pyridin-3-yl)methyl)aniline (**3e**)

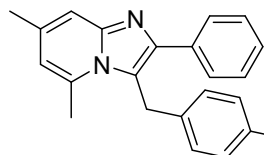

Flash column chromatography on silica gel (eluent: PE/EA = 1/1, v/v) to afford **3e**. Yellow solid (68.7 mg, 70%), mp 211.6-212.4 °C.  $^1H$  NMR (400 MHz,  $CDCl_3$ )  $\delta$  7.67 – 7.63 (m, 2H), 7.39 – 7.34 (m, 2H), 7.33 – 7.28 (m, 2H), 6.81 (d,  $J = 8.1$  Hz, 2H), 6.63 (d,  $J = 8.4$  Hz, 2H), 6.27 (s, 1H), 4.50 (s, 2H), 3.52 (m, 2H), 2.58 (s, 3H), 2.32 (s, 3H).  $^{13}C$  NMR (100 MHz,  $CDCl_3$ )  $\delta$  147.2, 144.8, 135.6, 131.0, 128.6, 128.6, 127.6, 119.0, 116.4, 115.8, 114.2, 30.8, 21.0, 20.0. HR-ESI-MS ( $m/z$ ): calcd for  $C_{22}H_{22}N_3$  [ $M + H$ ] $^+$ : 328.1814, found: 328.1816.

#### 4-((6-Chloro-2-phenylimidazo[1,2-*a*]pyridin-3-yl)methyl)aniline (**3f**)

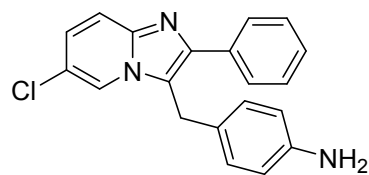

Flash column chromatography on silica gel (eluent: PE/EA = 1/1, v/v) to afford **3f**. Yellow solid (70.9 mg, 71%), mp 158.6-159.3 °C.  $^1H$  NMR (400 MHz,  $CDCl_3$ )  $\delta$  7.77 (d,  $J = 7.7$  Hz, 3H), 7.61 (d,  $J = 9.5$  Hz, 1H), 7.43 (t,  $J = 7.5$  Hz, 2H), 7.36 (t,  $J = 7.4$  Hz, 1H), 7.13 (dd,  $J = 9.5, 1.9$  Hz, 1H), 6.91 (d,  $J = 8.0$  Hz, 2H), 6.64 (d,  $J = 8.2$  Hz, 2H), 4.35 (s, 2H), 3.11 (d,  $J = 165.9$  Hz, 2H).  $^{13}C$  NMR (100 MHz,  $CDCl_3$ )  $\delta$  145.6, 145.0, 143.2, 134.2, 128.8, 128.6, 128.2, 128.0, 125.8, 125.6, 121.4, 120.4, 119.2, 118.0, 115.8, 29.2. HR-ESI-MS ( $m/z$ ): calcd for  $C_{20}H_{17}ClN_3$  [ $M + H$ ] $^+$ : 334.1111, found: 334.1115.

#### 4-((2-(*P*-tolyl)imidazo[1,2-*a*]pyridin-3-yl)methyl)aniline (**3g**)

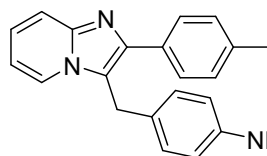

Flash column chromatography on silica gel (eluent: PE/EA = 1/1, v/v) to afford **3g**. Yellow solid (68.6 mg, 73%), mp 133.4-134.3 °C.  $^1H$  NMR (400 MHz,  $CDCl_3$ )  $\delta$  7.70 (d,  $J = 7.9$  Hz, 3H), 7.66 (d,  $J = 9.0$  Hz, 1H), 7.23 (d,  $J = 7.8$  Hz, 2H), 7.17 – 7.11 (m, 1H), 6.90 (d,  $J = 8.2$  Hz, 2H), 6.66 (t,  $J = 7.3$  Hz, 1H), 6.59 (d,  $J = 8.4$  Hz, 2H), 4.35 (s, 2H), 3.52 (s, 2H), 2.38 (s, 3H).  $^{13}C$  NMR (100 MHz,  $CDCl_3$ )  $\delta$  145.2, 144.6, 143.8, 137.4, 131.6, 129.4, 128.6, 128.2, 126.4, 124.2, 123.6, 118.2, 117.4, 115.6, 112.0, 29.2, 21.4. HR-ESI-MS ( $m/z$ ): calcd for  $C_{21}H_{20}N_3$  [ $M + H$ ] $^+$ : 314.1657, found: 314.1660.

#### 4-((2-(*O*-tolyl)imidazo[1,2-*a*]pyridin-3-yl)methyl)aniline (**3h**)

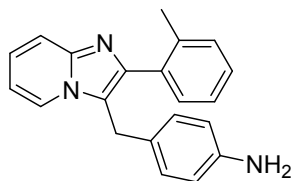

Flash column chromatography on silica gel (eluent: PE/EA = 1/1, v/v) to afford **3h**. Yellow solid (66.7 mg, 71%), mp 143.6-144.2 °C. <sup>1</sup>H NMR (400 MHz, CDCl<sub>3</sub>) δ 7.71 (d, *J* = 6.8 Hz, 1H), 7.63 (d, *J* = 9.1 Hz, 1H), 7.36 (d, *J* = 6.9 Hz, 1H), 7.29 (d, *J* = 6.3 Hz, 2H), 7.21 (dt, *J* = 7.1, 3.7 Hz, 1H), 7.17 – 7.12 (m, 1H), 6.82 (d, *J* = 8.1 Hz, 2H), 6.69 – 6.65 (m, 1H), 6.58 – 6.53 (m, 2H), 4.13 (s, 2H), 3.45 (s, 2H), 2.36 (s, 3H). <sup>13</sup>C NMR (100 MHz, CDCl<sub>3</sub>) δ 145.2, 144.6, 144.4, 137.8, 134.0, 130.6, 130.4, 128.6, 128.2, 126.4, 125.4, 124.0, 123.8, 119.4, 117.4, 115.6, 111.8, 28.8, 20.4. HR-ESI-MS (*m/z*): calcd for C<sub>21</sub>H<sub>20</sub>N<sub>3</sub> [M + H]<sup>+</sup>: 314.1657, found: 314.1660.

#### 4-((2-(*M*-tolyl)imidazo[1,2-*a*]pyridin-3-yl)methyl)aniline (**3i**)

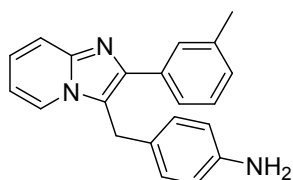

Flash column chromatography on silica gel (eluent: PE/EA = 1/1, v/v) to afford **3i**. Yellow solid (68.6 mg, 73%), mp 128.2-128.8 °C. <sup>1</sup>H NMR (400 MHz, CDCl<sub>3</sub>) δ 7.75 – 7.66 (m, 3H), 7.53 (d, *J* = 7.7 Hz, 1H), 7.30 (t, *J* = 7.6 Hz, 1H), 7.21 – 7.13 (m, 2H), 6.92 (d, *J* = 8.1 Hz, 2H), 6.70 (t, *J* = 6.2 Hz, 1H), 6.62 (d, *J* = 8.4 Hz, 2H), 4.38 (s, 2H), 3.51 (d, *J* = 93.5 Hz, 2H), 2.40 (s, 3H). <sup>13</sup>C NMR (100 MHz, CDCl<sub>3</sub>) δ 145.4, 144.8, 138.4, 134.4, 129.2, 128.8, 128.6, 128.6, 126.4, 125.2, 124.2, 123.8, 118.6, 117.4, 115.8, 112.2, 29.2, 21.6. HR-ESI-MS (*m/z*): calcd for C<sub>21</sub>H<sub>20</sub>N<sub>3</sub> [M + H]<sup>+</sup>: 314.1657, found: 314.1664.

#### 4-((2-(3-Methoxyphenyl)imidazo[1,2-*a*]pyridin-3-yl)methyl)aniline (**3j**)

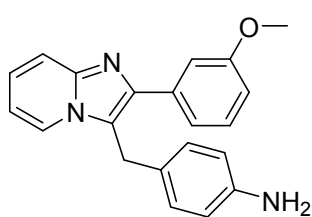

Flash column chromatography on silica gel (eluent: PE/EA = 1/1, v/v) to afford **3j**. Brown solid (77.0 mg, 78%), mp 173.7-174.2 °C. <sup>1</sup>H NMR (400 MHz, CDCl<sub>3</sub>) δ 7.73 (d, *J* = 6.9 Hz, 1H), 7.67 (d, *J* = 9.0 Hz, 1H), 7.39 – 7.29 (m, 3H), 7.18 – 7.13 (m, 1H), 6.90 (d, *J* = 8.4 Hz, 3H), 6.69 (t, *J* = 6.8 Hz, 1H), 6.60 (d, *J* = 8.3 Hz, 2H), 4.37 (s, 2H), 3.80 (s, 3H), 3.37 (s, 2H). <sup>13</sup>C NMR (100 MHz, CDCl<sub>3</sub>) δ 156.0, 145.4, 144.8, 143.8, 136.0, 129.6, 128.6, 126.4, 124.2, 123.6, 120.6, 118.6, 117.4, 115.8, 114.2, 113.2, 112.2, 55.4, 29.2. HR-ESI-MS (*m/z*): calcd for C<sub>21</sub>H<sub>20</sub>N<sub>3</sub>O [M + H]<sup>+</sup>: 330.1606, found: 330.1614.

#### 4-((2-(4-Methoxyphenyl)imidazo[1,2-*a*]pyridin-3-yl)methyl)aniline (**3k**)

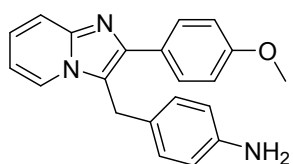

Flash column chromatography on silica gel (eluent: PE/EA = 1/1, v/v) to afford **3k**. Yellow solid (70.3mg, 71%), mp 168.3-169.0 °C. <sup>1</sup>H NMR (400 MHz,

CDCl<sub>3</sub>) δ 7.72 (d, *J* = 8.4 Hz, 2H), 7.70 – 7.63 (m, 2H), 7.14 (t, *J* = 7.9 Hz, 1H), 6.96 (d, *J* = 8.6 Hz, 2H), 6.90 (d, *J* = 8.1 Hz, 2H), 6.67 (t, *J* = 7.0 Hz, 1H), 6.60 (d, *J* = 8.4 Hz, 2H), 4.34 (s, 2H), 3.82 (s, 3H), 3.55 (s, 2H). <sup>13</sup>C NMR (100 MHz, CDCl<sub>3</sub>) δ 159.4, 145.2, 144.6, 143.6, 129.4, 128.6, 127.2, 126.4, 124.0, 123.6, 117.8, 117.2, 115.8, 114.2, 112.0, 55.4, 29.2. HR-ESI-MS (*m/z*): calcd for C<sub>21</sub>H<sub>20</sub>N<sub>3</sub>O [M + H]<sup>+</sup>: 330.1606, found: 330.1609.

#### 4-((2-(2,6-Dimethoxyphenyl)imidazo[1,2-*a*]pyridin-3-yl)methyl)anilinee (3l)

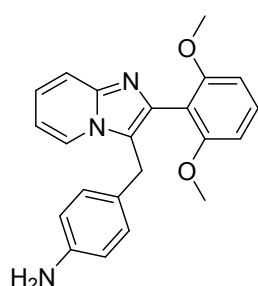

Flash column chromatography on silica gel (eluent: PE/EA = 1/1, v/v) to afford **3l**.

Brown solid (74.3mg, 69%), mp 132.2-133.0 °C. <sup>1</sup>H NMR (400 MHz, CDCl<sub>3</sub>) δ 7.70 – 7.64 (m, 2H), 7.19 (s, 1H), 7.16 – 7.11 (m, 1H), 6.89 (d, *J* = 5.3 Hz, 4H), 6.66 (t, *J* = 6.9 Hz, 1H), 6.57 (d, *J* = 8.2 Hz, 2H), 4.16 (s, 2H), 3.78 (s, 3H), 3.62 (s, 3H), 3.39 (s, 2H). <sup>13</sup>C NMR (100 MHz, CDCl<sub>3</sub>) δ 153.6, 151.4, 145.0, 144.6, 129.0, 126.8, 124.4, 123.8, 120.6, 117.4, 117.0, 115.6, 115.2, 112.4, 112.0, 56.0, 29.4. HR-ESI-MS (*m/z*): calcd for C<sub>22</sub>H<sub>22</sub>N<sub>3</sub>O<sub>2</sub> [M + H]<sup>+</sup>: 360.1712, found: 360.1715.

#### 4-((2-(4-Fluorophenyl)imidazo[1,2-*a*]pyridin-3-yl)methyl)aniline (3m)

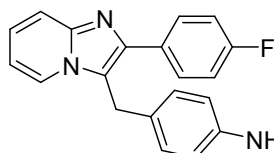

Flash column chromatography on silica gel (eluent: PE/EA = 1/1, v/v) to afford

**3m**. Yellow solid (80.9 mg, 85%), mp 138.4-139.3 °C. <sup>1</sup>H NMR (400 MHz, CDCl<sub>3</sub>) δ 7.79 – 7.69 (m, 3H), 7.65 (d, *J* = 9.0 Hz, 1H), 7.18 – 7.14 (m, 1H), 7.10 (t, *J* = 8.7 Hz, 2H), 6.89 (d, *J* = 8.1 Hz, 2H), 6.69 (t, *J* = 6.5 Hz, 1H), 6.60 (d, *J* = 8.3 Hz, 2H), 4.33 (s, 2H), 3.57 (s, 2H). <sup>13</sup>C NMR (100 MHz, CDCl<sub>3</sub>) δ 162.6 (d, *J* = 246.8 Hz), 145.4, 144.8, 143.0, 130.8 (d, *J* = 3.0 Hz), 130.0 (d, *J* = 8.1 Hz), 126.0, 124.4, 123.6, 118.2, 117.4, 115.8, 115.6, 112.2, 29.0. HR-ESI-MS (*m/z*): calcd for C<sub>20</sub>H<sub>17</sub>FN<sub>3</sub> [M + H]<sup>+</sup>: 318.1407, found: 318.1406.

#### 4-((2-(3-Fluorophenyl)imidazo[1,2-*a*]pyridin-3-yl)methyl)aniline (3n)

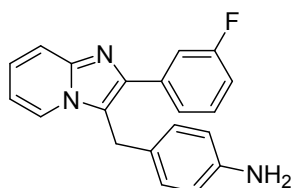

Flash column chromatography on silica gel (eluent: PE/EA = 1/1, v/v) to afford

**3n**. Brown solid (66.6 mg, 70%), mp 153.8-154.5 °C. <sup>1</sup>H NMR (400 MHz, CDCl<sub>3</sub>) δ 7.70 (q, *J* = 10.0, 8.8 Hz, 3H), 7.35 (td, *J* = 7.8, 3.3 Hz, 1H), 7.26 – 7.21 (m, 1H), 7.19 – 7.12 (m, 2H), 6.88 (d, *J* = 8.1 Hz, 2H), 6.68 (t, *J* = 6.7 Hz, 1H), 6.62 – 6.55 (m, 2H), 4.23 (s, 2H), 3.43 (s, 2H). <sup>13</sup>C NMR (100 MHz, CDCl<sub>3</sub>) δ 160.0 (d, *J* = 247.8 Hz),

145.2, 145.0, 138.6, 132.2 (d,  $J = 3.4$  Hz), 129.8 (d,  $J = 8.1$  Hz), 128.8, 126.3, 124.4 (d,  $J = 3.5$  Hz), 124.2, 124.0, 122.6 (d,  $J = 14.7$  Hz), 120.4, 117.6, 116.0 (d,  $J = 22.4$  Hz), 115.6, 112.2, 29.2. HR-ESI-MS ( $m/z$ ): calcd for  $C_{20}H_{17}FN_3$  [ $M + H$ ] $^+$ : 318.1407, found: 318.1408.

#### 4-((2-(4-Chlorophenyl)imidazo[1,2-*a*]pyridin-3-yl)methyl)aniline (3o)

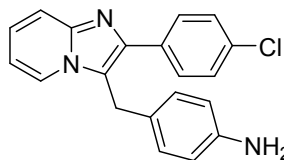

Flash column chromatography on silica gel (eluent: PE/EA = 1/1, v/v) to afford **3o**. Yellow solid (68.0 mg, 68%), mp 181.8-182.3 °C.  $^1H$  NMR (400 MHz,  $CDCl_3$ )  $\delta$  7.73 (dd,  $J = 7.8, 3.5$  Hz, 4H), 7.67 (d,  $J = 8.9$  Hz, 1H), 7.44 – 7.35 (m, 2H), 7.25 – 7.14 (m, 1H), 6.90 (d,  $J = 8.2$  Hz, 2H), 6.72 (t,  $J = 7.4$  Hz, 1H), 6.62 (d,  $J = 8.3$  Hz, 2H), 4.35 (s, 2H).  $^{13}C$  NMR (100 MHz,  $CDCl_3$ )  $\delta$  145.4, 144.8, 142.4, 133.8, 132.8, 129.6, 129.0, 129.0, 128.6, 126.0, 124.8, 123.8, 118.6, 117.4, 115.8, 112.6, 29.0. HR-ESI-MS ( $m/z$ ): calcd for  $C_{20}H_{17}ClN_3$  [ $M + H$ ] $^+$ : 334.1111, found: 334.1116.

#### 4-((2-(2-Chlorophenyl)imidazo[1,2-*a*]pyridin-3-yl)methyl)aniline (3p)

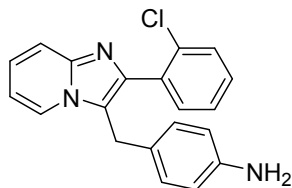

Flash column chromatography on silica gel (eluent: PE/EA = 1/1, v/v) to afford **3p**. Yellow solid (80.9 mg, 81%), mp 168.3-169.0 °C.  $^1H$  NMR (400 MHz,  $CDCl_3$ )  $\delta$  7.85 (d,  $J = 2.0$  Hz, 1H), 7.73 (d,  $J = 6.9$  Hz, 1H), 7.69 – 7.60 (m, 2H), 7.32 (d,  $J = 7.1$  Hz, 2H), 7.20 – 7.14 (m, 1H), 6.89 (d,  $J = 8.1$  Hz, 2H), 6.70 (t,  $J = 7.4$  Hz, 1H), 6.61 (d,  $J = 8.3$  Hz, 2H), 4.35 (s, 2H), 3.53 (s, 2H).  $^{13}C$  NMR (100 MHz,  $CDCl_3$ )  $\delta$  145.4, 144.8, 142.4, 136.6, 134.6, 130.0, 128.6, 128.4, 127.8, 126.2, 126.0, 124.6, 123.8, 119.0, 117.6, 115.8, 112.4, 29.0. HR-ESI-MS ( $m/z$ ): calcd for  $C_{20}H_{17}ClN_3$  [ $M + H$ ] $^+$ : 334.1111, found: 334.1116.

#### 4-((2-(4-(Trifluoromethyl)phenyl)imidazo[1,2-*a*]pyridin-3-yl)methyl)aniline (3q)

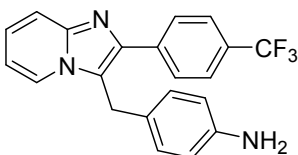

Flash column chromatography on silica gel (eluent: PE/EA = 1/1, v/v) to afford **3q**. Yellow solid (83.7mg, 76%), mp 200.2-221.0 °C.  $^1H$  NMR (400 MHz,  $CDCl_3$ )  $\delta$  7.91 (d,  $J = 8.1$  Hz, 2H), 7.77 (d,  $J = 6.9$  Hz, 1H), 7.69 (dd,  $J = 14.1, 8.5$  Hz, 3H), 7.25 – 7.20 (m, 1H), 6.90 (d,  $J = 7.9$  Hz, 2H), 6.76 (t,  $J = 6.8$  Hz, 1H), 6.63 (d,  $J = 8.0$  Hz, 2H), 4.38 (s, 2H), 3.24 (s, 2H).  $^{13}C$  NMR (100 MHz,  $CDCl_3$ )  $\delta$  145.6, 144.8, 140.0 (q,  $J = 236.5$  Hz), 138.0, 129.6 (q,  $J = 3.3$  Hz), 128.6, 128.4, 125.8, 125.7 (q,  $J = 7.0$  Hz), 125.0, 123.8, 119.4, 117.6, 115.8, 112.8, 29.2. HR-ESI-MS ( $m/z$ ): calcd for  $C_{21}H_{17}F_3N_3$  [ $M + H$ ] $^+$ : 368.1375, found: 368.1374.

#### 4-((2-(3,4-Dichlorophenyl)imidazo[1,2-a]pyridin-3-yl)methyl)aniline (3r)

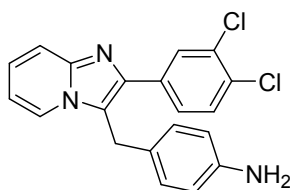

Flash column chromatography on silica gel (eluent: PE/EA = 1/1, v/v) to afford **3r**. Yellow solid (79.3 mg, 72%), mp 155.7-156.3 °C. <sup>1</sup>H NMR (400 MHz, CDCl<sub>3</sub>) δ 7.94 (d, *J* = 2.0 Hz, 1H), 7.75 (d, *J* = 6.9 Hz, 1H), 7.66 (d, *J* = 8.8 Hz, 1H), 7.58 (dd, *J* = 8.3, 2.0 Hz, 1H), 7.46 (d, *J* = 8.3 Hz, 1H), 7.24 – 7.16 (m, 1H), 6.88 (d, *J* = 8.1 Hz, 2H), 6.73 (t, *J* = 6.8 Hz, 1H), 6.64 – 6.60 (m, 2H), 4.35 (s, 2H), 3.44 (s, 2H). <sup>13</sup>C NMR (100 MHz, CDCl<sub>3</sub>) δ 145.6, 145.0, 141.4, 134.8, 133.0, 131.8, 130.6, 130.0, 128.6, 127.2, 125.8, 124.8, 123.8, 119.2, 117.6, 115.8, 112.6, 29.2. HR-ESI-MS (*m/z*): calcd for C<sub>20</sub>H<sub>16</sub>Cl<sub>2</sub>N<sub>3</sub> [M + H]<sup>+</sup>: 368.0721, found: 368.0718.

#### 4-((7-Methyl-2-(*p*-tolyl)imidazo[1,2-a]pyridin-3-yl)methyl)aniline (3s)

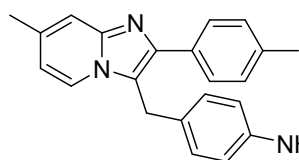

Flash column chromatography on silica gel (eluent: PE/EA = 1/1, v/v) to afford **3s**. Yellow solid (70.7 mg, 72%), mp 104.0-104.8 °C. <sup>1</sup>H NMR (400 MHz, CDCl<sub>3</sub>) δ 7.68 (d, *J* = 8.0 Hz, 2H), 7.57 (d, *J* = 6.9 Hz, 1H), 7.41 (s, 1H), 7.22 (d, *J* = 7.9 Hz, 2H), 6.90 (d, *J* = 8.2 Hz, 2H), 6.59 (d, *J* = 8.3 Hz, 2H), 6.50 (dd, *J* = 7.0, 1.6 Hz, 1H), 4.32 (s, 2H), 3.52 (s, 2H), 2.37 (s, 3H), 2.36 (s, 3H). <sup>13</sup>C NMR (100 MHz, CDCl<sub>3</sub>) δ 145.2, 145.2, 143.4, 137.4, 135.0, 131.8, 129.4, 128.6, 128.0, 126.6, 122.8, 117.4, 115.8, 115.6, 114.6, 29.0, 21.4, 21.4. HR-ESI-MS (*m/z*): calcd for C<sub>22</sub>H<sub>22</sub>N<sub>3</sub> [M + H]<sup>+</sup>: 328.1814, found: 328.1814.

#### 4-((6-Methyl-2-(*p*-tolyl)imidazo[1,2-a]pyridin-3-yl)methyl)aniline (3t)

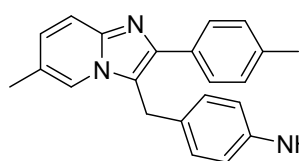

Flash column chromatography on silica gel (eluent: PE/EA = 1/1, v/v) to afford **3t**. Brown solid (70.7 mg, 72%), mp 107.2-108.1 °C. <sup>1</sup>H NMR (400 MHz, CDCl<sub>3</sub>) δ 7.72 – 7.65 (m, 3H), 7.52 (s, 1H), 7.23 (d, *J* = 7.6 Hz, 2H), 7.10 – 7.07 (m, 1H), 6.92 (d, *J* = 8.0 Hz, 2H), 6.63 (d, *J* = 8.0 Hz, 2H), 4.33 (s, 2H), 3.98 – 3.73 (m, 2H), 2.37 (s, 3H), 2.25 (s, 3H). <sup>13</sup>C NMR (100 MHz, CDCl<sub>3</sub>) δ 145.4, 143.0, 137.8, 129.6, 128.6, 128.4, 128.2, 128.0, 126.2, 122.6, 121.4, 118.0, 116.2, 116.0, 115.8, 29.0, 21.4, 18.6. HR-ESI-MS (*m/z*): calcd for C<sub>22</sub>H<sub>22</sub>N<sub>3</sub> [M + H]<sup>+</sup>: 328.1814, found: 328.1818.

#### 4-((8-Chloro-2-(*p*-tolyl)imidazo[1,2-a]pyridin-3-yl)methyl)aniline (3u)



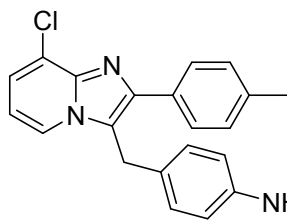

Flash column chromatography on silica gel (eluent: PE/EA = 1/1, v/v) to afford **3u**. Yellow solid (87.5 mg, 84%), mp 152.9-153.3 °C. <sup>1</sup>H NMR (400 MHz, CDCl<sub>3</sub>) δ 7.71 (d, *J* = 7.8 Hz, 2H), 7.64 (d, *J* = 6.8 Hz, 1H), 7.23 (dd, *J* = 7.5, 4.9 Hz, 3H), 6.89 (d, *J* = 8.0 Hz, 2H), 6.60 (d, *J* = 7.6 Hz, 3H), 4.35 (s, 2H), 3.48 (s, 2H), 2.38 (s, 3H). <sup>13</sup>C NMR (100 MHz, CDCl<sub>3</sub>) δ 145.4, 144.8, 142.2, 137.8, 131.4, 129.4, 128.6, 128.4, 126.0, 123.2, 123.0, 122.4, 120.0, 115.8, 111.6, 29.4 21.4. HR-ESI-MS (*m/z*): calcd for C<sub>21</sub>H<sub>19</sub>ClN<sub>3</sub> [M + H]<sup>+</sup>: 348.1268, found: 348.1271.

#### 4-((6-Chloro-2-(4-chlorophenyl)imidazo[1,2-a]pyridin-3-yl)methyl)aniline (3v)

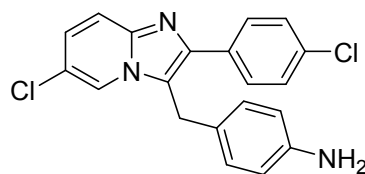

Flash column chromatography on silica gel (eluent: PE/EA = 1/1, v/v) to afford **3v**. Black solid (76.0 mg, 69%), mp 132.6-133.1 °C. <sup>1</sup>H NMR (400 MHz, CDCl<sub>3</sub>) δ 7.77 (s, 1H), 7.70 (d, *J* = 8.3 Hz, 2H), 7.65 (d, *J* = 9.4 Hz, 1H), 7.39 (d, *J* = 8.1 Hz, 2H), 7.18 (d, *J* = 9.4 Hz, 1H), 6.88 (d, *J* = 7.9 Hz, 2H), 6.64 (d, *J* = 8.0 Hz, 2H), 4.32 (s, 2H), 3.41 (s, 2H). <sup>13</sup>C NMR (100 MHz, CDCl<sub>3</sub>) δ 145.6, 143.4, 143.0, 134.2, 132.4, 129.4, 129.0, 128.6, 126.2, 125.2, 121.6, 120.8, 119.4, 117.8, 116.0, 29.0. HR-ESI-MS (*m/z*): calcd for C<sub>20</sub>H<sub>16</sub>Cl<sub>2</sub>N<sub>3</sub> [M + H]<sup>+</sup>: 368.0724, found: 368.0721.

#### 4-((6-Chloro-2-(4-fluorophenyl)imidazo[1,2-a]pyridin-3-yl)methyl)aniline (3w)

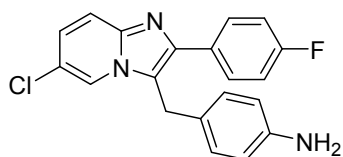

Flash column chromatography on silica gel (eluent: PE/EA = 1/1, v/v) to afford **3w**. Brown solid (84.3 mg, 80%), mp 159.8-160.3 °C. <sup>1</sup>H NMR (400 MHz, CDCl<sub>3</sub>) δ 7.79 – 7.69 (m, 3H), 7.59 (d, *J* = 9.5 Hz, 1H), 7.17 – 7.07 (m, 3H), 6.89 (d, *J* = 8.1 Hz, 2H), 6.64 (d, *J* = 8.4 Hz, 2H), 4.32 (s, 2H), 3.49 (s, 2H). <sup>13</sup>C NMR (100 Hz, CDCl<sub>3</sub>) δ 162.8 (d, *J* = 247.7 Hz), 145.6 144.0, 143.2, 130.2 (d, *J* = 3.0 Hz), 130.0 (d, *J* = 8.2 Hz), 128.6, 125.8, 125.4, 121.4, 120.6, 119.0, 117.8, 116.0, 115.6, 29.0. HR-ESI-MS (*m/z*): calcd for C<sub>20</sub>H<sub>16</sub>ClFN<sub>3</sub> [M + H]<sup>+</sup>: 352.1017, found: 352.1021.

#### 4-((7-Chloro-2-(4-fluorophenyl)imidazo[1,2-a]pyridin-3-yl)methyl)aniline (3x)

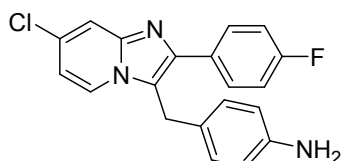

Flash column chromatography on silica gel (eluent: PE/EA = 1/1, v/v) to afford **3x**. Brown solid (75.8 mg, 72%), mp 168.2-169.0 °C. <sup>1</sup>H NMR (400 MHz, CDCl<sub>3</sub>) δ 7.79 – 7.70 (m, 3H), 7.58 (d, *J* = 9.5 Hz, 1H), 7.16 – 7.07

(m, 3H), 6.88 (d,  $J = 8.1$  Hz, 2H), 6.62 (d,  $J = 8.2$  Hz, 2H), 4.30 (s, 2H), 3.50 (s, 2H).  $^{13}\text{C}$  NMR (100 MHz,  $\text{CDCl}_3$ )  $\delta$  162.8 (d,  $J = 247.5$  Hz), 145.6, 144.0, 143.2, 130.4(d,  $J = 3.0$  Hz), 129.8 (d,  $J = 8.1$  Hz), 128.6, 125.6, 125.4, 121.4, 120.4, 119.0, 117.8, 115.8, 115.6, 29.0. HR-ESI-MS ( $m/z$ ): calcd for  $\text{C}_{20}\text{H}_{16}\text{ClFN}_3$  [ $\text{M} + \text{H}$ ] $^+$ : 352.1017, found: 352.1020.

#### 4-((2-Phenylimidazo[1,2-*a*]pyridin-3-yl)methyl)naphthalen-1-amine (3y)

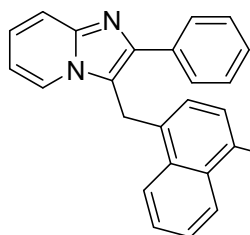

Flash column chromatography on silica gel (eluent: PE/EA = 1/1, v/v) to afford **3y**. Brown solid (53.4 mg, 51%).  $^1\text{H}$  NMR (400 MHz,  $\text{CDCl}_3$ )  $\delta$  8.13 (d,  $J = 8.8$  Hz, 1H), 7.95 (dd,  $J = 8.4, 1.4$  Hz, 1H), 7.79 – 7.74 (m, 3H), 7.67 – 7.64 (m, 1H), 7.63 – 7.55 (m, 2H), 7.38 (t,  $J = 7.4$  Hz, 2H), 7.32 (d,  $J = 7.1$  Hz, 1H), 7.24 – 7.19 (m, 1H), 6.72 – 6.67 (m, 1H), 6.67 – 6.57 (m, 2H), 4.77 (s, 2H), 4.11 (s, 2H).  $^{13}\text{C}$  NMR (100 MHz,  $\text{CDCl}_3$ )  $\delta$  144.8, 141.8, 134.0, 132.6, 128.8, 128.8, 128.2, 128.0, 126.6, 125.2, 125.0, 124.8, 124.6, 123.8, 122.0, 121.8, 117.8, 117.4, 112.6, 109.6, 27.0. HR-ESI-MS ( $m/z$ ): calcd for  $\text{C}_{24}\text{H}_{20}\text{N}_3$  [ $\text{M} + \text{H}$ ] $^+$ : 350.1657, found: 350.1661.

#### 2-Methyl-4-((2-phenylimidazo[1,2-*a*]pyridin-3-yl)methyl)aniline (3z)

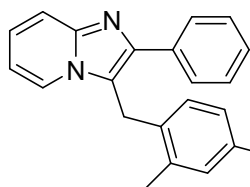

Flash column chromatography on silica gel (eluent: PE/EA = 1/1, v/v) to afford **3z**. Yellow solid (76.1mg, 81%), mp 177.4-178.3 °C.  $^1\text{H}$  NMR (400 MHz,  $\text{CDCl}_3$ )  $\delta$  7.74 (d,  $J = 7.1$  Hz, 2H), 7.69 (d,  $J = 9.0$  Hz, 1H), 7.63 (d,  $J = 6.9$  Hz, 1H), 7.41 (t,  $J = 7.4$  Hz, 2H), 7.32 (t,  $J = 7.4$  Hz, 1H), 7.17 (t,  $J = 7.9$  Hz, 1H), 6.69 (t,  $J = 6.7$  Hz, 1H), 6.61 (d,  $J = 2.5$  Hz, 1H), 6.43 (d,  $J = 8.1$  Hz, 1H), 6.33 (dd,  $J = 8.2, 2.4$  Hz, 1H), 4.24 (s, 2H), 3.50 (s, 2H), 2.33 (s, 3H).  $^{13}\text{C}$  NMR (100 MHz,  $\text{CDCl}_3$ )  $\delta$  145.2, 144.8, 144.0, 137.4, 134.6, 128.6, 128.2, 127.6, 127.6, 124.2, 124.2, 123.6, 118.0, 117.6, 117.4, 113.0, 112.2, 26.8, 19.8. HR-ESI-MS ( $m/z$ ): calcd for  $\text{C}_{21}\text{H}_{20}\text{N}_3$  [ $\text{M} + \text{H}$ ] $^+$ : 314.1657, found: 314.1657.

#### 2-(4-Fluorophenyl)-*N*-phenylindolizine-3-carboxamide (3aa)

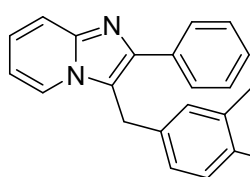

Flash column chromatography on silica gel (eluent: PE/EA = 1/1, v/v) to afford **3aa**. Yellow solid (74.2 mg, 79%), mp 165.4-166.3 °C.  $^1\text{H}$  NMR (400 MHz,  $\text{CDCl}_3$ )  $\delta$  7.82 (d,  $J = 8.4$  Hz, 2H), 7.72 (d,  $J = 6.9$  Hz, 1H), 7.67 (d,  $J = 9.0$  Hz, 1H), 7.43 (t,  $J = 7.5$  Hz, 2H), 7.34 (t,  $J = 7.4$  Hz, 1H), 7.19 – 7.12 (m, 1H),

6.83 (s, 1H), 6.79 (d,  $J = 8.0$  Hz, 1H), 6.68 (t,  $J = 6.9$  Hz, 1H), 6.59 (d,  $J = 8.0$  Hz, 1H), 4.36 (s, 2H), 3.48 (s, 2H), 2.09 (s, 3H).  $^{13}\text{C}$  NMR (100 MHz,  $\text{CDCl}_3$ )  $\delta$  144.8, 143.8, 143.4, 134.6, 129.8, 128.6, 128.2, 127.6, 126.4, 126.2, 124.2, 123.8, 123.0, 118.6, 117.4, 115.4, 112.0, 29.2, 17.8, 17.6. HR-ESI-MS ( $m/z$ ): calcd for  $\text{C}_{21}\text{H}_{20}\text{N}_3$  [ $\text{M} + \text{H}$ ] $^+$ : 314.1657, found: 314.1660.

#### 2-Methoxy-4-((2-phenylimidazo[1,2-*a*]pyridin-3-yl)methyl)aniline (**3ab**)

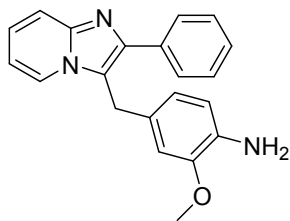

Flash column chromatography on silica gel (eluent: PE/EA = 1/1, v/v) to afford

**3ab**. Brown solid (80.0 mg, 81%), mp 173.8-174.3 °C.  $^1\text{H}$  NMR (400 MHz,

$\text{CDCl}_3$ )  $\delta$  7.81 (d,  $J = 7.1$  Hz, 2H), 7.75 (d,  $J = 6.9$  Hz, 1H), 7.70 (d,  $J = 9.0$  Hz, 1H), 7.44 (t,  $J = 7.5$  Hz, 2H), 7.35 (t,  $J = 7.3$  Hz, 1H), 7.22 – 7.16 (m, 1H), 6.72

(t,  $J = 6.8$  Hz, 1H), 6.63 (d,  $J = 7.9$  Hz, 1H), 6.57 (s, 1H), 6.54 (d,  $J = 8.0$  Hz, 1H), 4.41 (s, 2H), 3.72 (s, 3H).

$^{13}\text{C}$  NMR (100 MHz,  $\text{CDCl}_3$ )  $\delta$  148.0 144.8, 143.8, 135.0, 134.4, 128.8, 128.4, 127.8, 126.6, 124.4, 123.8, 120.0, 118.4, 117.4, 115.4, 112.4, 110.0, 55.6, 29.6. HR-ESI-MS ( $m/z$ ): calcd for  $\text{C}_{21}\text{H}_{20}\text{N}_3\text{O}$  [ $\text{M} + \text{H}$ ] $^+$ : 330.1606, found: 330.1613.

#### 4-((2-Phenylimidazo[1,2-*a*]pyridin-3-yl)methyl)-2-(trifluoromethyl)aniline(**3ac**)

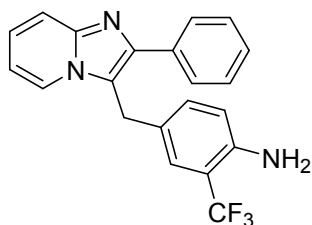

Flash column chromatography on silica gel (eluent: PE/EA = 1/1, v/v) to afford

**3ac**. Yellow solid (55.1 mg, 50%), mp 160.3-160.9 °C.  $^1\text{H}$  NMR (400 MHz,

$\text{CDCl}_3$ )  $\delta$  7.78 – 7.74 (m, 2H), 7.69 (d,  $J = 7.9$  Hz, 2H), 7.43 (t,  $J = 7.5$  Hz, 2H), 7.36 (d,  $J = 7.3$  Hz, 1H), 7.27 (s, 1H), 7.21 – 7.16 (m, 1H), 6.94 (d,  $J = 8.4$  Hz,

1H), 6.73 (t,  $J = 6.8$  Hz, 1H), 6.63 (d,  $J = 8.4$  Hz, 1H), 4.38 (s, 2H), 4.16 (s, 2H).  $^{13}\text{C}$  NMR (100 MHz,  $\text{CDCl}_3$ )  $\delta$  145.0, 144.2, 143.6, 134.4, 132.0, 128.8, 128.2, 128.0, 125.8 (d,  $J = 4.9$  Hz), 125.8, 124.4, 123.4, 120.6 (d,  $J = 286.5$  Hz), 118.0, 117.4, 114.4 (d,  $J = 15.0$  Hz), 28.8. HR-ESI-MS ( $m/z$ ): calcd for  $\text{C}_{21}\text{H}_{17}\text{F}_3\text{N}_3$  [ $\text{M} + \text{H}$ ] $^+$ : 368.1375, found: 368.1379.

#### 2-Methyl-5-((2-phenylimidazo[1,2-*a*]pyridin-3-yl)methyl)aniline (**3ad**)

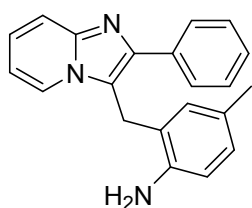

Flash column chromatography on silica gel (eluent: PE/EA = 1/1, v/v) to afford **3ad**.

Yellow solid (64.8 mg, 69%), mp 176.4-177.2 °C.  $^1\text{H}$  NMR (400 MHz,  $\text{CDCl}_3$ )  $\delta$

7.78 – 7.69 (m, 4H), 7.43 (t,  $J = 7.5$  Hz, 2H), 7.35 (t,  $J = 7.4$  Hz, 1H), 7.24 – 7.18 (m, 1H), 6.91 (d,  $J = 7.0$  Hz, 1H), 6.74 (t,  $J = 6.7$  Hz, 1H), 6.69 (d,  $J = 8.0$  Hz, 1H), 6.47

(d,  $J = 2.0$  Hz, 1H), 4.19 (s, 2H), 3.46 (s, 2H), 2.08 (s, 3H).  $^{13}\text{C}$  NMR (100 MHz,  $\text{CDCl}_3$ )  $\delta$  145.0, 144.0, 142.0, 134.2, 128.8, 128.8, 128.6, 128.4, 128.2, 128.0, 124.6, 123.8, 120.8, 117.4, 117.0, 116.2, 112.6, 25.8, 20.6. HR-ESI-MS ( $m/z$ ): calcd for  $\text{C}_{21}\text{H}_{20}\text{N}_3$  [ $\text{M} + \text{H}$ ] $^+$ : 314.1657, found: 314.1659.

### 2-Fluoro-5-((2-phenylimidazo[1,2-*a*]pyridin-3-yl)methyl)aniline (**3ae**)

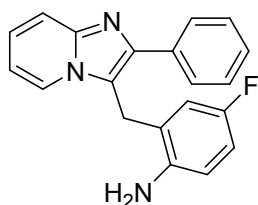

Flash column chromatography on silica gel (eluent: PE/EA = 1/1, v/v) to afford **3ae**.

Brown solid (65.6mg, 69%), mp 211.8-212.0 °C.  $^1\text{H}$  NMR (400 MHz,  $\text{CDCl}_3$ )  $\delta$  7.72 (d,  $J = 8.9$  Hz, 3H), 7.69 (d,  $J = 6.8$  Hz, 1H), 7.42 (t,  $J = 7.5$  Hz, 2H), 7.35 (t,  $J = 7.3$  Hz, 1H), 7.25 – 7.20 (m, 1H), 6.83 – 6.74 (m, 2H), 6.70 (dd,  $J = 8.7, 4.8$  Hz, 1H), 6.38 (dd,  $J = 9.4, 2.9$  Hz, 1H), 4.19 (s, 2H), 3.28 (s, 2H).  $^{13}\text{C}$  NMR (100 MHz,  $\text{CDCl}_3$ )  $\delta$  158.0, 155.8, 145.0, 144.2, 140.6, 134.0, 128.8, 128.4, 128.2, 125.0, 123.6, 122.6 (d,  $J = 6.0$  Hz), 117.6, 117.2 (d,  $J = 7.5$  Hz), 116.2, 114.6 (d,  $J = 2.2$  Hz), 114.4, 112.8, 26.0. HR-ESI-MS ( $m/z$ ): calcd for  $\text{C}_{20}\text{H}_{17}\text{FN}_3$  [ $\text{M} + \text{H}$ ] $^+$ : 318.1407, found: 318.1406.

### 2-Chloro-5-((2-phenylimidazo[1,2-*a*]pyridin-3-yl)methyl)aniline (**3af**)

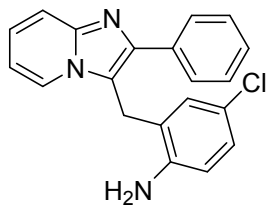

Flash column chromatography on silica gel (eluent: PE/EA = 1/1, v/v) to afford **3af**.

Yellow solid (75.0 mg, 75%), mp 218.2-219.0 °C.  $^1\text{H}$  NMR (400 MHz,  $\text{CDCl}_3$ )  $\delta$  7.74 – 7.70 (m, 3H), 7.69 (d,  $J = 6.8$  Hz, 1H), 7.43 (t,  $J = 7.5$  Hz, 2H), 7.36 (t,  $J = 7.3$  Hz, 1H), 7.23 (d,  $J = 8.8$  Hz, 1H), 7.05 (dd,  $J = 8.4, 2.4$  Hz, 1H), 6.78 (t,  $J = 6.8$  Hz, 1H), 6.72 – 6.62 (m, 2H), 4.18 (s, 2H), 3.87 (d,  $J = 120.4$  Hz, 2H).  $^{13}\text{C}$  NMR (100 MHz,  $\text{CDCl}_3$ )  $\delta$  145.2, 144.4, 143.2, 134.0, 129.0, 128.4, 128.2, 128.0, 127.6, 125.0, 124.0, 123.6, 122.4, 117.6, 117.2, 115.8, 112.8, 26.0. HR-ESI-MS ( $m/z$ ): calcd for  $\text{C}_{20}\text{H}_{17}\text{ClN}_3$  [ $\text{M} + \text{H}$ ] $^+$ : 334.1111, found: 334.1112.

### 2-Bromo-5-((2-phenylimidazo[1,2-*a*]pyridin-3-yl)methyl)aniline (**3ag**)

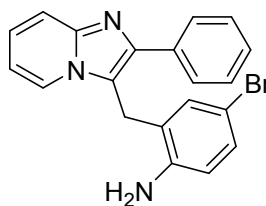

Flash column chromatography on silica gel (eluent: PE/EA = 1/1, v/v) to afford

**3ag**. Yellow solid (86.0 mg, 76%), mp 229.9-230.8 °C.  $^1\text{H}$  NMR (400 MHz,  $\text{CDCl}_3$ )  $\delta$  7.70 (t,  $J = 5.5$  Hz, 3H), 7.67 (d,  $J = 6.8$  Hz, 1H), 7.42 (t,  $J = 7.5$  Hz, 2H), 7.35 (t,  $J = 7.3$  Hz, 1H), 7.24 – 7.15 (m, 2H), 6.81 – 6.71 (m, 2H), 6.62 (d,  $J = 8.4$  Hz, 1H), 4.15 (s, 2H), 3.71 (s, 2H).  $^{13}\text{C}$  NMR (100 MHz,  $\text{CDCl}_3$ )  $\delta$  145.2, 144.4, 143.8, 134.0, 131.0, 130.4,

128.8, 128.4, 128.0, 124.8, 123.6, 122.8, 117.6, 115.8, 112.8, 111.0, 25.8. HR-ESI-MS ( $m/z$ ): calcd for  $C_{20}H_{17}BrN_3$  [ $M + H$ ] $^+$ : 378.0606, found: 378.0607.

### 2-Methoxy-5-((2-phenylimidazo[1,2-*a*]pyridin-3-yl)methyl)aniline (**3ah**)

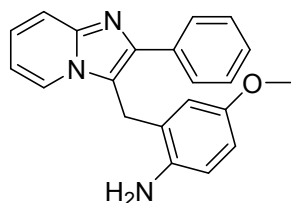

Flash column chromatography on silica gel (eluent: PE/EA = 1/1, v/v) to afford **3ah**. Yellow liquid (63.2 mg, 64%).  $\delta$  7.77 – 7.69 (m, 4H), 7.42 (t,  $J = 7.5$  Hz, 2H), 7.34 (t,  $J = 7.4$  Hz, 1H), 7.24 – 7.17 (m, 1H), 6.77 – 6.65 (m, 3H), 6.27 (d,  $J = 2.7$  Hz, 1H), 4.22 (s, 2H), 3.55 (s, 3H), 3.35 (d,  $J = 21.0$  Hz, 2H).  $^{13}C$  NMR (100 MHz,  $CDCl_3$ )  $\delta$  153.4, 144.8, 143.8, 138.0, 134.0, 128.8, 128.4, 128.0, 125.0, 123.8, 122.6, 117.4, 116.8, 114.2, 112.8, 112.8, 55.8, 26.0. HR-ESI-MS ( $m/z$ ): calcd for  $C_{21}H_{20}N_3O$  [ $M + H$ ] $^+$ : 330.1606, found: 330.1605.

### *N*-Methyl-4-((2-phenylimidazo[1,2-*a*]pyridin-3-yl)methyl)aniline (**4a**)

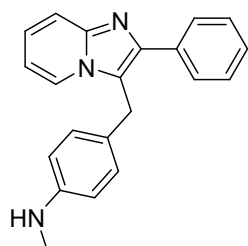

Preparative TLC on silica gel (eluent: PE/EA = 2/1, v/v) to afford **4a**. Yellow solid (45.1 mg, 48%), mp 168.9-169.5 °C.  $^1H$  NMR (400 MHz,  $CDCl_3$ )  $\delta$  7.81 (d,  $J = 7.0$  Hz, 2H), 7.74 (d,  $J = 6.9$  Hz, 1H), 7.69 (d,  $J = 9.0$  Hz, 1H), 7.43 (t,  $J = 7.6$  Hz, 2H), 7.35 (t,  $J = 7.4$  Hz, 1H), 7.20 – 7.15 (m, 1H), 6.96 (d,  $J = 8.4$  Hz, 2H), 6.71 (t,  $J = 6.8$  Hz, 1H), 6.56 (d,  $J = 8.3$  Hz, 2H), 4.39 (s, 2H), 2.81 (s, 3H).  $^{13}C$  NMR (100 MHz,  $CDCl_3$ )  $\delta$  148.4, 129.8, 128.8, 128.6, 128.4, 127.8, 124.6, 123.8, 118.6, 117.4, 115.4, 113.0, 112.4, 31.0, 29.0. HR-ESI-MS ( $m/z$ ): calcd for  $C_{21}H_{20}N_3$  [ $M + H$ ] $^+$ : 314.1657, found: 314.1658.

### *N*-Methyl-4-((8-methyl-2-phenyl-2*H*-4*H*-imidazo[1,2-*a*]pyridin-3-yl)methyl)aniline (**4b**)

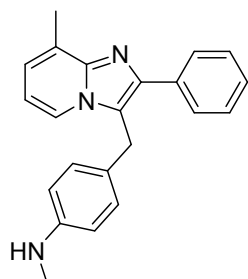

Preparative TLC on silica gel (eluent: PE/EA = 2/1, v/v) to afford **4b**. Yellow solid (47.1 mg, 48%), mp 179.9-180.6 °C.  $^1H$  NMR (400 MHz,  $CDCl_3$ )  $\delta$  7.81 (d,  $J = 7.6$  Hz, 2H), 7.62 (d,  $J = 6.8$  Hz, 1H), 7.43 (t,  $J = 7.5$  Hz, 2H), 7.34 (t,  $J = 7.3$  Hz, 1H), 6.96 (d,  $J = 7.8$  Hz, 3H), 6.62 (t,  $J = 6.8$  Hz, 1H), 6.55 (d,  $J = 7.0$  Hz, 2H), 4.36 (s, 2H), 2.80 (s, 3H), 2.70 (s, 3H).  $^{13}C$  NMR (100 MHz,  $CDCl_3$ )  $\delta$  148.2, 145.2, 143.4, 134.8, 128.6, 128.6, 128.6, 127.6, 127.4, 125.2, 123.2, 121.6, 119.0, 113.0, 112.2, 31.0, 29.2, 17.4. HR-ESI-MS ( $m/z$ ): calcd for  $C_{22}H_{22}N_3$  [ $M + H$ ] $^+$ : 328.1814, found: 328.1819.

#### 4-((2-(4-Methoxyphenyl)-2H-414-imidazo[1,2-a]pyridin-3-yl)methyl)-N-methylaniline (4c)

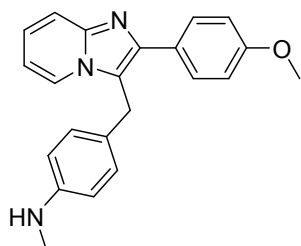

Preparative TLC on silica gel (eluent: PE/EA= 2/1, v/v) to afford **4c**. Yellow solid (42.2 mg, 41%), mp 138.1-138.7 °C. <sup>1</sup>H NMR (400 MHz, CDCl<sub>3</sub>) δ 7.73 (dd, *J* = 7.6, 5.3 Hz, 3H), 7.67 (d, *J* = 9.1 Hz, 1H), 7.19 – 7.14 (m, 1H), 6.96 (dd, *J* = 8.4, 5.1 Hz, 4H), 6.69 (t, *J* = 6.8 Hz, 1H), 6.55 (d, *J* = 8.4 Hz, 2H), 4.36 (s, 2H), 3.83 (s, 3H), 2.80 (s, 3H). <sup>13</sup>C NMR (101 MHz, CDCl<sub>3</sub>) δ 159.4, 148.4, 144.6, 143.4, 129.4, 128.6, 127.2, 125.0, 124.2, 123.6, 118.0, 117.2, 114.2, 113.0, 112.2, 55.4, 31.0, 29.0. HR-ESI-MS (m/z): calcd for C<sub>22</sub>H<sub>22</sub>N<sub>3</sub>O [M + H]<sup>+</sup>: 344.1763, found: 344.1767.

#### 4-((2-(3-Methoxyphenyl)-2H-414-imidazo[1,2-a]pyridin-3-yl)methyl)-N-methylaniline (4d)

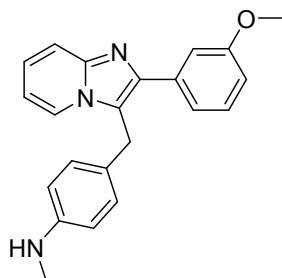

Preparative TLC on silica gel (eluent: PE/EA= 2/1, v/v) to afford **4d**. Yellow solid (42.2 mg, 41%), mp 136.2-127.0 °C. <sup>1</sup>H NMR (400 MHz, CDCl<sub>3</sub>) δ 7.75 (d, *J* = 6.8 Hz, 1H), 7.68 (d, *J* = 9.0 Hz, 1H), 7.40 (s, 1H), 7.34 (dd, *J* = 12.0, 7.6 Hz, 2H), 7.20 – 7.15 (m, 1H), 6.95 (d, *J* = 8.1 Hz, 2H), 6.90 (d, *J* = 7.9 Hz, 1H), 6.71 (t, *J* = 6.8 Hz, 1H), 6.55 (d, *J* = 8.2 Hz, 2H), 4.40 (s, 2H), 3.82 (s, 3H), 2.81 (s, 3H). <sup>13</sup>C NMR (101 MHz, CDCl<sub>3</sub>) δ 160.0, 148.4, 144.6, 135.8, 129.6, 128.6, 124.8, 124.4, 123.8, 120.6, 118.8, 117.4, 114.2, 113.2, 113.0, 112.4, 55.4, 31.0, 29.2. HR-ESI-MS (m/z): calcd for C<sub>22</sub>H<sub>22</sub>N<sub>3</sub>O [M + H]<sup>+</sup>: 344.1763, found: 344.1767.

#### N,3-Dimethyl-4-((2-phenyl-2H-414-imidazo[1,2-a]pyridin-3-yl)methyl)aniline (4e)

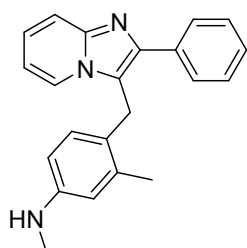

Preparative TLC on silica gel (eluent: PE/EA= 2/1, v/v) to afford **4e**. Yellow solid (48.1 mg, 49%), mp 160.1-160.9°C. <sup>1</sup>H NMR (400 MHz, CDCl<sub>3</sub>) δ 7.74 (t, *J* = 7.7 Hz, 3H), 7.67 (d, *J* = 6.8 Hz, 1H), 7.41 (t, *J* = 7.5 Hz, 2H), 7.34 (t, *J* = 7.3 Hz, 1H), 7.23 – 7.17 (m, 1H), 6.73 (t, *J* = 6.8 Hz, 1H), 6.56 (d, *J* = 2.5 Hz, 1H), 6.49 (d, *J* = 8.2 Hz, 1H), 6.29 (dd, *J* = 8.3, 2.5 Hz, 1H), 4.27 (s, 2H), 2.81 (s, 3H), 2.37 (s, 3H). <sup>13</sup>C NMR (101 MHz, CDCl<sub>3</sub>) δ 148.4, 144.8, 137.4, 134.4, 128.8, 128.2, 127.8, 127.8, 124.4, 123.8, 122.8, 118.4, 117.4, 115.0, 112.4, 110.4, 31.0, 27.0, 20.2. HR-ESI-MS (m/z): calcd for C<sub>22</sub>H<sub>22</sub>N<sub>3</sub> [M + H]<sup>+</sup>: 328.1814, found: 328.1821.

#### N,2-Dimethyl-4-((2-phenyl-2H-414-imidazo[1,2-a]pyridin-3-yl)methyl)aniline (4f)

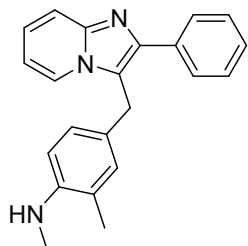

Preparative TLC on silica gel (eluent: PE/EA= 2/1, v/v) to afford **4f**. Brown solid (44.2 mg, 45%), mp 158.2-159.0 °C. <sup>1</sup>H NMR (400 MHz, CDCl<sub>3</sub>) δ 7.83 (d, *J* = 7.4 Hz, 2H), 7.75 (d, *J* = 6.9 Hz, 1H), 7.70 (d, *J* = 9.0 Hz, 1H), 7.44 (t, *J* = 7.6 Hz, 2H), 7.38 – 7.32 (m, 1H), 7.21 – 7.15 (m, 1H), 6.91 (d, *J* = 8.3 Hz, 1H), 6.86 (s, 1H), 6.70 (t, *J* = 6.8 Hz, 1H), 6.54 (d, *J* = 8.2 Hz, 1H), 4.39 (s, 2H), 2.86 (d, *J* = 2.4 Hz, 3H),

2.07 (s, 3H). <sup>13</sup>C NMR (101 MHz, CDCl<sub>3</sub>) δ 146.4, 144.6, 134.2, 129.4, 128.8, 128.4, 127.8, 126.4, 124.6, 124.2, 123.8, 122.8, 118.8, 117.4, 112.4, 109.6, 31.0, 29.2, 17.6. HR-ESI-MS (*m/z*): calcd for C<sub>22</sub>H<sub>22</sub>N<sub>3</sub> [M + H]<sup>+</sup>: 328.1814, found: 328.1819.

#### 4-Methoxy-*N*-methyl-2-((2-phenyl-2*H*-414-imidazo[1,2-*a*]pyridin-3-yl)methyl)aniline (**4g**)

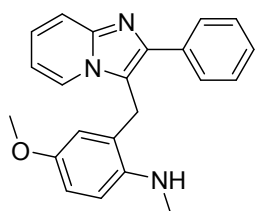

Preparative TLC on silica gel (eluent: PE/EA= 2/1, v/v) to afford **4g**. Brown solid (41.2 mg, 40%), mp 149.9-150.3 °C. <sup>1</sup>H NMR (400 MHz, CDCl<sub>3</sub>) δ 7.73 (d, *J* = 6.8 Hz, 2H), 7.72 – 7.66 (m, 2H), 7.41 (dd, *J* = 8.3, 6.8 Hz, 2H), 7.37 – 7.31 (m, 1H), 7.22 – 7.16 (m, 1H), 6.79 (dd, *J* = 8.7, 2.9 Hz, 1H), 6.72 (t, *J* = 6.8 Hz, 1H), 6.67 (d,

*J* = 8.7 Hz, 1H), 6.31 (d, *J* = 2.9 Hz, 1H), 4.15 (s, 2H), 3.58 (s, 3H), 2.86 (s, 3H). <sup>13</sup>C NMR (101 MHz, CDCl<sub>3</sub>) δ 152.2, 144.6, 143.6, 141.4, 133.6, 128.8, 128.4, 128.2, 125.0, 123.8, 122.2, 117.2, 116.8, 114.8, 112.8, 112.2, 111.4, 55.8, 31.6, 25.8. HR-ESI-MS (*m/z*): calcd for C<sub>22</sub>H<sub>22</sub>N<sub>3</sub>O [M + H]<sup>+</sup>: 344.1763, found: 344.1767.

#### 4-Chloro-*N*-methyl-2-((2-phenyl-2*H*-414-imidazo[1,2-*a*]pyridin-3-yl)methyl)aniline (**4h**)

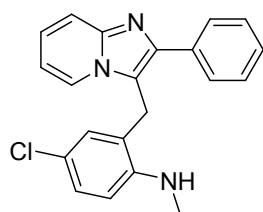

Preparative TLC on silica gel (eluent: PE/EA= 2/1, v/v) to afford **4h**. Yellow solid (50.0 mg, 48%), mp 194.1-194.8 °C. <sup>1</sup>H NMR (400 MHz, CDCl<sub>3</sub>) <sup>1</sup>H NMR (400 MHz, Chloroform-*d*) δ 7.74 (d, *J* = 8.9 Hz, 1H), 7.72 – 7.67 (m, 3H), 7.43 (t, *J* = 7.4 Hz, 2H), 7.36 (t, *J* = 7.3 Hz, 1H), 7.26 – 7.19 (m, 1H), 7.16 (dd, *J* = 8.6, 2.5 Hz,

1H), 6.78 (t, *J* = 6.8 Hz, 1H), 6.67 – 6.57 (m, 2H), 4.12 (s, 2H), 3.69 (s, 1H), 2.84 (s, 3H). <sup>13</sup>C NMR (101 MHz, CDCl<sub>3</sub>) δ 145.8, 145.0, 144.0, 133.6, 129.0, 128.4, 128.2, 128.2, 127.2, 125.2, 123.6, 122.2, 121.6, 117.6, 115.8, 113.0, 111.2, 31.0, 25.8. HR-ESI-MS (*m/z*): calcd for C<sub>21</sub>H<sub>19</sub>ClN<sub>3</sub> [M + H]<sup>+</sup>: 348.1268, found: 348.1270.

#### 4-Bromo-*N*-methyl-2-((2-phenyl-2*H*-414-imidazo[1,2-*a*]pyridin-3-yl)methyl)aniline (**4i**)

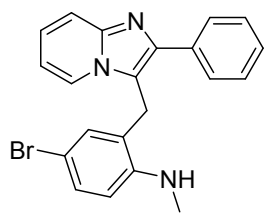

Preparative TLC on silica gel (eluent: PE/EA= 2/1, v/v) to afford **4i**. Yellow solid (54.0 mg, 46%), mp 135.0-135.5 °C. <sup>1</sup>H NMR (400 MHz, CDCl<sub>3</sub>) δ 7.73 – 7.67 (m, 4H), 7.44 (t, *J* = 7.4 Hz, 2H), 7.39 – 7.34 (m, 1H), 7.29 (dd, *J* = 8.6, 2.4 Hz, 1H), 7.23 (ddd, *J* = 9.0, 6.7, 1.3 Hz, 1H), 6.83 – 6.74 (m, 2H), 6.55 (d, *J* = 8.6 Hz, 1H), 4.12 (s, 2H), 3.68 (s, 1H), 2.82 (s, 3H). <sup>13</sup>C NMR (101 MHz, CDCl<sub>3</sub>) δ 146.2, 145.2, 144.6, 134.2, 131.0, 130.0, 129.0, 128.4, 128.2, 124.8, 123.6, 122.2, 117.8, 115.8, 112.8, 111.8, 109.4, 30.8, 26.0. HR-ESI-MS (*m/z*): calcd for C<sub>21</sub>H<sub>19</sub>BrN<sub>3</sub> [M + H]<sup>+</sup>: 392.0762, found: 392.0758.

#### ***N*-((2-Phenylimidazo[1,2-*a*]pyridin-3-yl)methyl)aniline (5a)**

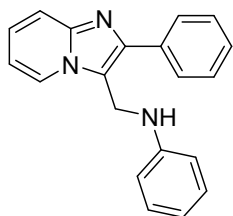

Flash column chromatography on silica gel (eluent: PE/EA= 2/1, v/v) to afford **5a**. Brown solid (77.2 mg, 86%), mp 145.1-146.0 °C. <sup>1</sup>H NMR (400 MHz, CDCl<sub>3</sub>) δ 8.11 (d, *J* = 6.6 Hz, 1H), 7.77 (d, *J* = 7.3 Hz, 2H), 7.68 (d, *J* = 9.1 Hz, 1H), 7.44 (t, *J* = 7.4 Hz, 2H), 7.36 (dd, *J* = 8.7, 5.9 Hz, 1H), 7.28 – 7.20 (m, 3H), 6.83 (t, *J* = 7.3 Hz, 2H), 6.76 (d, *J* = 7.9 Hz, 2H), 4.69 (s, 2H), 3.95 (s, 1H). <sup>13</sup>C NMR (101 MHz, CDCl<sub>3</sub>) δ 147.6, 145.2, 144.6, 133.8, 129.6, 128.8, 128.4, 128.2, 125.2, 124.2, 118.4, 117.6, 116.6, 113.2, 112.8, 38.4. HR-ESI-MS (*m/z*): calcd for C<sub>20</sub>H<sub>18</sub>N<sub>3</sub> [M + H]<sup>+</sup>: 300.1501, found: 300.1504.

#### **6-Methyl-3-phenethyl-2-phenylimidazo[1,2-*a*]pyridine (5b)**

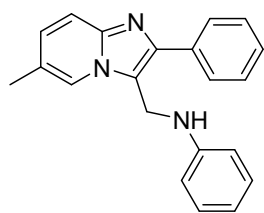

Flash column chromatography on silica gel (eluent: PE/EA = 2/1, v/v) to afford **5b**. Yellow solid (79.9 mg, 85%), mp 138.3-139.2 °C. <sup>1</sup>H NMR (400 MHz, CDCl<sub>3</sub>) δ 7.85 (s, 1H), 7.75 (d, *J* = 6.4 Hz, 2H), 7.57 (d, *J* = 9.2 Hz, 1H), 7.44 – 7.39 (m, 2H), 7.35 (d, *J* = 7.3 Hz, 1H), 7.29 (d, *J* = 8.4 Hz, 2H), 7.08 (d, *J* = 9.2 Hz, 1H), 6.84 (t, *J* = 7.4 Hz, 1H), 6.79 (d, *J* = 7.9 Hz, 2H), 4.63 (s, 2H), 3.96 (s, 1H), 2.31 (s, 3H). <sup>13</sup>C NMR (100 MHz, CDCl<sub>3</sub>) δ 147.8, 144.4, 144.2, 134.0, 129.6, 128.8, 128.4, 128.0, 122.4, 121.8, 118.4, 116.8, 116.2, 113.2, 38.4, 18.4. HR-ESI-MS (*m/z*): calcd for C<sub>21</sub>H<sub>20</sub>N<sub>3</sub> [M + H]<sup>+</sup>: 314.1657, found: 314.1654.

#### ***N*-((6-chloro-2-phenylimidazo[1,2-*a*]pyridin-3-yl)methyl)aniline (5c)**

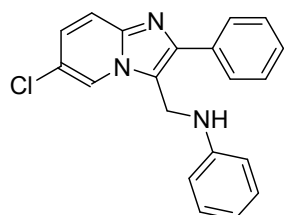

Flash column chromatography on silica gel (eluent: PE/EA = 2/1, v/v) to afford **5c**. Yellow solid (87.9 mg, 88%), mp 164.8-165.2 °C. <sup>1</sup>H NMR (400 MHz, CDCl<sub>3</sub>) δ 8.10 (s, 1H), 7.68 (d, *J* = 7.5 Hz, 2H), 7.55 (d, *J* = 9.5 Hz, 1H), 7.36 (dt, *J* = 13.4, 7.1 Hz, 3H), 7.27 – 7.22 (m, 2H), 7.15 (d, *J* = 9.4 Hz, 1H), 6.83 (t, *J* = 7.4



Hz, 1H), 6.77 (d,  $J = 7.9$  Hz, 2H), 4.61 (s, 2H), 4.03 (s, 1H).  $^{13}\text{C}$  NMR (100 MHz,  $\text{CDCl}_3$ )  $\delta$  147.6, 145.4, 143.4, 133.4, 129.6, 129.4, 129.0, 128.4, 128.4, 126.6, 122.2, 121.0, 118.8, 117.8, 117.2, 113.4, 112.8, 38.4. HR-ESI-MS ( $m/z$ ): calcd for  $\text{C}_{20}\text{H}_{17}\text{ClN}_3$  [ $\text{M} + \text{H}$ ] $^+$ : 334.1111, found: 334.1107.

***N*-((7-Methyl-2-phenylimidazo[1,2-*a*]pyridin-3-yl)methyl)aniline (5d)**

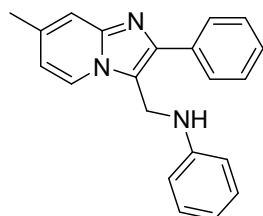

Flash column chromatography on silica gel (eluent: PE/EA = 2/1, v/v) to afford **5d**.

Yellow solid (78.9 mg, 84%), mp 139.8-140.2 °C.  $^1\text{H}$  NMR (400 MHz,  $\text{CDCl}_3$ )  $\delta$  7.85 (d,  $J = 6.9$  Hz, 1H), 7.69 (d,  $J = 7.5$  Hz, 2H), 7.37 – 7.31 (m, 3H), 7.29 (d,  $J = 7.6$  Hz, 1H), 7.23 (t,  $J = 7.7$  Hz, 2H), 6.78 (t,  $J = 7.3$  Hz, 1H), 6.73 (d,  $J = 8.0$  Hz,

2H), 6.52 (s, 1H), 4.53 (s, 2H), 4.08 (s, 1H), 2.35 (s, 3H).  $^{13}\text{C}$  NMR (100 MHz,  $\text{CDCl}_3$ )  $\delta$  147.8, 145.4, 144.0, 136.0, 134.0, 129.4, 128.6, 128.2, 128.0, 123.2, 118.2, 115.8, 115.8, 115.0, 113.0, 38.2, 21.4. HR-ESI-MS ( $m/z$ ): calcd for  $\text{C}_{21}\text{H}_{20}\text{N}_3$  [ $\text{M} + \text{H}$ ] $^+$ : 314.1657, found: 314.1655.

***N*-((8-Methyl-2-phenylimidazo[1,2-*a*]pyridin-3-yl)methyl)aniline (5e)**

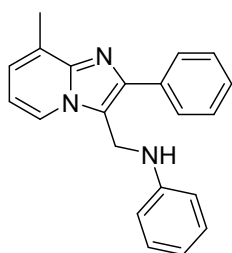

Flash column chromatography on silica gel (eluent: PE/EA = 2/1, v/v) to afford **5e**.

Yellow solid (71.4 mg, 76%), mp 111.0-111.4 °C.  $^1\text{H}$  NMR (400 MHz,  $\text{CDCl}_3$ )  $\delta$  7.98 (d,  $J = 6.9$  Hz, 1H), 7.78 (d,  $J = 7.0$  Hz, 2H), 7.44 (t,  $J = 7.4$  Hz, 3H), 7.37 (d,  $J = 7.2$  Hz, 2H), 7.28 (s, 2H), 7.04 (d,  $J = 6.9$  Hz, 1H), 6.82 (t,  $J = 7.4$  Hz, 1H), 6.75 (t,  $J = 6.6$  Hz, 3H), 4.67 (s, 2H), 3.83 (s, 1H), 2.69 (s, 3H).  $^{13}\text{C}$  NMR (100 MHz,  $\text{CDCl}_3$ )  $\delta$

147.8, 145.6, 144.2, 134.0, 129.6, 128.8, 128.6, 128.0, 127.6, 124.0, 122.0, 118.4, 117.0, 113.2, 112.8, 38.4, 17.4. HR-ESI-MS ( $m/z$ ): calcd for  $\text{C}_{21}\text{H}_{20}\text{N}_3$  [ $\text{M} + \text{H}$ ] $^+$ : 314.1657, found: 314.1655.

***N*-((2-(*M*-olyl)imidazo[1,2-*a*]pyridin-3-yl)methyl)aniline (5f)**

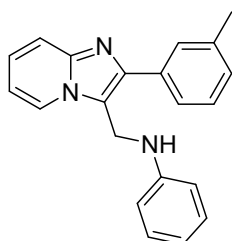

Flash column chromatography on silica gel (eluent: PE/EA = 2/1, v/v) to afford **5f**.

Yellow solid (78.9 mg, 84%), mp 100.5-101.0 °C.  $^1\text{H}$  NMR (400 MHz,  $\text{CDCl}_3$ )  $\delta$  8.04 (d,  $J = 7.0$  Hz, 1H), 7.62 (d,  $J = 6.1$  Hz, 2H), 7.46 (d,  $J = 7.7$  Hz, 1H), 7.23 (t,  $J = 7.9$  Hz, 3H), 7.19 – 7.13 (m, 2H), 6.82 – 6.74 (m, 2H), 6.72 (d,  $J = 7.5$  Hz, 2H), 4.63 (s, 2H), 3.88 (s, 1H), 2.35 (s, 3H).  $^{13}\text{C}$  NMR (100 MHz,  $\text{CDCl}_3$ )  $\delta$  147.6, 145.2, 144.8,

138.6, 133.8, 129.6, 129.2, 129.0, 128.6, 125.4, 125.0, 124.2, 118.4, 117.4, 116.6, 113.2, 112.6, 38.4, 21.6.

HR-ESI-MS (m/z): calcd for C<sub>21</sub>H<sub>20</sub>N<sub>3</sub> [M + H]<sup>+</sup>: 314.1657, found: 314.1657.

***N*-((2-(*O*-tolyl)imidazo[1,2-*a*]pyridin-3-yl)methyl)aniline (5g)**

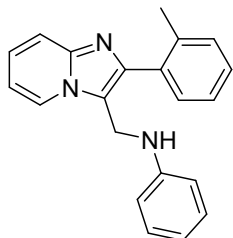

Flash column chromatography on silica gel (eluent: PE/EA = 2/1, v/v) to afford **5g**.

Yellow solid (77.0 mg, 82%), mp 107.1-107.4 °C. <sup>1</sup>H NMR (400 MHz, CDCl<sub>3</sub>) δ 8.20 (d, *J* = 6.8 Hz, 1H), 7.66 (d, *J* = 9.0 Hz, 1H), 7.31 (dd, *J* = 9.6, 5.9 Hz, 3H), 7.25 – 7.20 (m, 2H), 7.18 (d, *J* = 7.7 Hz, 2H), 6.84 (t, *J* = 6.8 Hz, 1H), 6.77 (t, *J* = 7.4 Hz, 1H), 6.65 (d, *J* = 8.0 Hz, 2H), 4.51 (s, 2H), 3.75 (s, 1H), 2.36 (s, 3H). <sup>13</sup>C NMR (100

MHz, CDCl<sub>3</sub>) δ 147.6, 145.0, 144.8, 137.6, 133.2, 130.6, 130.6, 129.4, 128.4, 125.6, 124.8, 124.6, 118.4, 117.6, 117.6, 113.2, 112.4, 38.0, 20.4. HR-ESI-MS (m/z): calcd for C<sub>21</sub>H<sub>20</sub>N<sub>3</sub> [M + H]<sup>+</sup>: 314.1657, found: 314.1656.

***N*-((2-(4-Fluorophenyl)imidazo[1,2-*a*]pyridin-3-yl)methyl)aniline (5h)**

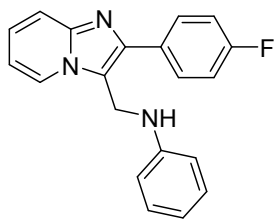

Flash column chromatography on silica gel (eluent: PE/EA = 2/1, v/v) to afford **5h**.

Yellow solid (77.1 mg, 81%), mp 158.6-159.0 °C. <sup>1</sup>H NMR (400 MHz, CDCl<sub>3</sub>) δ 8.12 (d, *J* = 6.9 Hz, 1H), 7.74 (dd, *J* = 8.5, 5.6 Hz, 2H), 7.67 (d, *J* = 9.0 Hz, 1H), 7.28 (d, *J* = 7.6 Hz, 4H), 7.11 (t, *J* = 8.6 Hz, 2H), 6.85 (q, *J* = 7.8 Hz, 2H), 6.77 (d,

*J* = 8.6 Hz, 2H), 4.65 (s, 2H), 4.03 (m, 1H). <sup>13</sup>C NMR (100 MHz, CDCl<sub>3</sub>) δ 163.0 (d, *J* = 246 Hz), 147.6, 144.8, 143.0, 130.2 (d, *J* = 8.0 Hz), 129.6, 129.4, 125.8, 124.4, 118.6, 117.2, 116.6, 116.0 (d, *J* = 21.0 Hz), 113.2, 113.2, 38.2. HR-ESI-MS (m/z): calcd for C<sub>20</sub>H<sub>17</sub>FN<sub>3</sub> [M + H]<sup>+</sup>: 318.1407, found: 318.1406.

***N*-((2-(4-Chlorophenyl)imidazo[1,2-*a*]pyridin-3-yl)methyl)aniline (5i)**

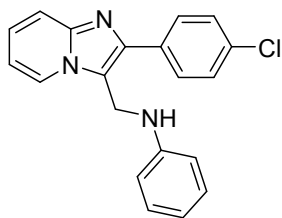

Flash column chromatography on silica gel (eluent: PE/EA = 2/1, v/v) to afford **5i**.

Brown solid (78.9 mg, 79%), mp 136.1-136.9 °C. <sup>1</sup>H NMR (400 MHz, CDCl<sub>3</sub>) δ 8.07 (d, *J* = 7.6 Hz, 1H), 7.70 (d, *J* = 8.5 Hz, 2H), 7.65 (d, *J* = 9.1 Hz, 1H), 7.38 (d, *J* = 8.5 Hz, 2H), 7.29 (d, *J* = 7.3 Hz, 3H), 6.83 (q, *J* = 7.0 Hz, 2H), 6.77 (d, *J* =

7.5 Hz, 2H), 4.64 (s, 2H), 3.95 (s, 1H). <sup>13</sup>C NMR (100 MHz, CDCl<sub>3</sub>) δ 147.4, 145.0, 143.2, 134.0, 132.2, 129.6, 129.4, 129.0, 125.4, 124.0, 118.6, 117.4, 116.6, 113.2, 112.8, 38.2. HR-ESI-MS (m/z): calcd for C<sub>20</sub>H<sub>17</sub>ClN<sub>3</sub> [M + H]<sup>+</sup>: 334.1111, found: 334.1109.

***N*-((6-Chloro-2-(4-chlorophenyl)imidazo[1,2-*a*]pyridin-3-yl)methyl)aniline (5j)**

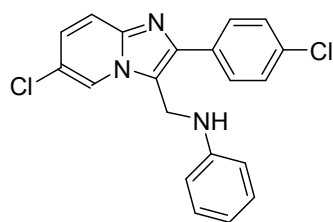

Flash column chromatography on silica gel (eluent: PE/EA = 2/1, v/v) to afford **5j**. Yellow solid (89.2 mg, 81%), mp 188.2-188.8 °C. <sup>1</sup>H NMR (400 MHz, CDCl<sub>3</sub>) δ 8.09 (d, *J* = 2.4 Hz, 1H), 7.67 – 7.59 (m, 2H), 7.55 (d, *J* = 9.5 Hz, 1H), 7.35 (d, *J* = 8.2 Hz, 3H), 7.34 – 7.26 (m, 3H), 7.19 (dd, *J* = 9.6, 1.9 Hz, 1H), 6.87 (t, *J* = 7.4 Hz, 1H), 6.81 (d, *J* = 8.8 Hz, 2H), 4.59 (s, 2H), 4.14 (d, *J* = 10.8 Hz, 1H). <sup>13</sup>C NMR (100 MHz, CDCl<sub>3</sub>) δ 147.4, 144.0, 143.2, 134.6, 131.4, 129.6, 129.4, 129.2, 127.0, 122.2, 121.4, 118.8, 117.6, 117.4, 113.4, 38.2. HR-ESI-MS (*m/z*): calcd for C<sub>20</sub>H<sub>16</sub>Cl<sub>2</sub>N<sub>3</sub> [*M* + H]<sup>+</sup>: 368.0721, found: 368.0728.

***N*-(Imidazo[1,2-*a*]pyridin-3-ylmethyl)aniline (5k)**

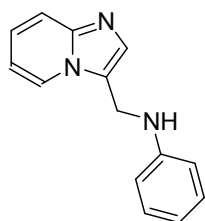

Flash column chromatography on silica gel (eluent: PE/EA = 2/1, v/v) to afford **5k**. Yellow solid (60.9 mg, 91%), mp 99.8-100.5 °C. <sup>1</sup>H NMR (400 MHz, CDCl<sub>3</sub>) δ 8.16 (d, *J* = 6.8 Hz, 1H), 7.68 (d, *J* = 9.1 Hz, 1H), 7.62 (s, 1H), 7.26 – 7.19 (m, 3H), 6.83 (dt, *J* = 17.3, 7.1 Hz, 2H), 6.75 (d, *J* = 8.0 Hz, 2H), 4.60 (s, 2H), 3.81 (s, 1H). <sup>13</sup>C NMR (100 MHz, CDCl<sub>3</sub>) δ 142.8, 127.4, 124.8, 120.2, 119.6, 116.4, 113.8, 113.0, 108.6, 108.0, 72.6, 72.6, 72.4, 72.0, 33.8. HR-ESI-MS (*m/z*): calcd for C<sub>14</sub>H<sub>14</sub>N<sub>3</sub> [*M* + H]<sup>+</sup>: 224.1188, found: 224.1188.

***N*-((6-Chloroimidazo[1,2-*a*]pyridin-3-yl)methyl)aniline (5l)**

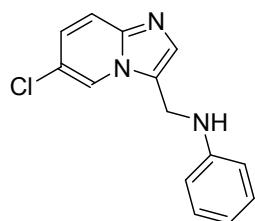

Flash column chromatography on silica gel (eluent: PE/EA = 2/1, v/v) to afford **5l**. Yellow solid (66.3 mg, 86%), mp 138.4-138.9 °C. <sup>1</sup>H NMR (400 MHz, CDCl<sub>3</sub>) δ 8.23 (s, 1H), 7.62 (s, 1H), 7.58 (d, *J* = 9.6 Hz, 1H), 7.29 (s, 2H), 7.29 (d, *J* = 8.4 Hz, 2H), 7.19 (dd, *J* = 9.6, 2.0 Hz, 1H), 6.86 (t, *J* = 7.4 Hz, 1H), 6.80 (d, *J* = 8.3 Hz, 2H), 4.59 (s, 2H), 3.99 (s, 1H). <sup>13</sup>C NMR (100 MHz, CDCl<sub>3</sub>) δ 147.6, 144.6, 133.8, 129.6, 125.8, 122.4, 121.8, 120.8, 118.8, 118.2, 113.6, 38.6. HR-ESI-MS (*m/z*): calcd for C<sub>14</sub>H<sub>13</sub>ClN<sub>3</sub> [*M* + H]<sup>+</sup>: 258.0798, found: 258.0800.

***N*-((2-(Tert-butyl)imidazo[1,2-*a*]pyridin-3-yl)methyl)aniline (5m)**

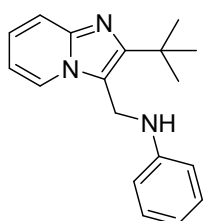

Flash column chromatography on silica gel (eluent: PE/EA = 2/1, v/v) to afford **5m**. Yellow solid (64.5 mg, 77%), mp 122.9-123.3 °C. <sup>1</sup>H NMR (400 MHz, CDCl<sub>3</sub>) δ 7.98 (d, *J* = 6.9 Hz, 1H), 7.63 (d, *J* = 9.0 Hz, 1H), 7.31 – 7.22 (m, 2H), 7.17 (d, *J* = 7.1 Hz, 1H), 6.81 (t, *J* = 7.4 Hz, 1H), 6.80 – 6.70 (m, 3H), 4.66 (s, 2H), 3.57 (s, 1H), 1.49 (s, 9H). <sup>13</sup>C

NMR (100 MHz, CDCl<sub>3</sub>)  $\delta$  153.6, 147.8, 143.6, 129.6, 124.2, 123.6, 118.6, 117.2, 115.0, 113.0, 112.2, 38.6, 33.4, 31.2. HR-ESI-MS (m/z): calcd for C<sub>18</sub>H<sub>22</sub>N<sub>3</sub> [M + H]<sup>+</sup>: 280.1814, found: 280.1813.

### 2-Methyl-N-((2-phenylimidazo[1,2-a]pyridin-3-yl)methyl)aniline (5n)

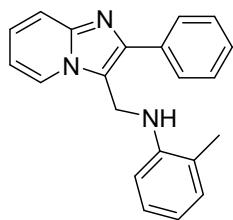

Flash column chromatography on silica gel (eluent: PE/EA = 2/1, v/v) to afford **5n**.

Yellow solid (78.0 mg, 83%), mp 138.2-139.0 °C. <sup>1</sup>H NMR (400 MHz, CDCl<sub>3</sub>)  $\delta$  8.14 (d, *J* = 6.8 Hz, 1H), 7.86 – 7.79 (m, 2H), 7.72 (dd, *J* = 9.1, 1.2 Hz, 1H), 7.47 (t, *J* = 7.4 Hz, 2H), 7.44 – 7.34 (m, 1H), 7.24 (d, *J* = 7.8 Hz, 2H), 7.15 (d, *J* = 7.3 Hz, 1H), 6.89

– 6.77 (m, 3H), 4.74 (s, 2H), 3.62 (s, 1H), 2.12 (s, 3H). <sup>13</sup>C NMR (100 MHz, CDCl<sub>3</sub>)  $\delta$  145.6, 145.4, 144.8, 134.0, 130.4, 128.8, 128.4, 128.2, 127.4, 125.0, 124.0, 123.0, 118.2, 117.6, 116.6, 112.6, 110.2, 38.4, 17.8.

HR-ESI-MS (m/z): calcd for C<sub>21</sub>H<sub>20</sub>N<sub>3</sub> [M + H]<sup>+</sup>: 314.1657, found: 314.1656.

### 3-Methyl-N-((2-phenylimidazo[1,2-a]pyridin-3-yl)methyl)aniline (5o)

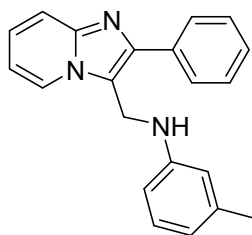

Flash column chromatography on silica gel (eluent: PE/EA = 2/1, v/v) to afford **5o**.

Yellow solid (79.9 mg, 85%), mp 138.2-139.0 °C. <sup>1</sup>H NMR (400 MHz, CDCl<sub>3</sub>)  $\delta$  8.06 (d, *J* = 6.9 Hz, 1H), 7.77 (d, *J* = 7.2 Hz, 2H), 7.65 (d, *J* = 9.1 Hz, 1H), 7.42 (t, *J* = 7.4 Hz, 2H), 7.35 (t, *J* = 7.3 Hz, 1H), 7.25 – 7.11 (m, 2H), 6.77 (t, *J* = 6.6 Hz, 1H),

6.66 (d, *J* = 7.5 Hz, 1H), 6.61 – 6.55 (m, 2H), 4.65 (s, 2H), 3.97 (s, 1H), 2.33 (s, 3H). <sup>13</sup>C NMR (100 MHz, CDCl<sub>3</sub>)  $\delta$  147.8, 145.2, 144.6, 139.4, 133.8, 129.4, 128.8, 128.4, 128.0, 125.0, 124.2, 119.2, 117.4, 116.6, 113.8, 112.4, 110.4, 38.2, 21.8. HR-ESI-MS (m/z): calcd for C<sub>21</sub>H<sub>20</sub>N<sub>3</sub> [M + H]<sup>+</sup>: 314.1657, found: 314.1659.

### 4-Methyl-N-((2-phenylimidazo[1,2-a]pyridin-3-yl)methyl)aniline (5p)

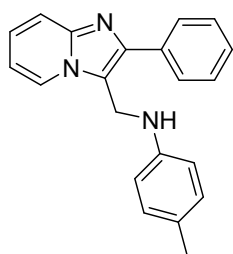

Flash column chromatography on silica gel (eluent: PE/EA = 2/1, v/v) to afford **5p**.

Yellow solid (83.6 mg, 89%), mp 133.8-134.3 °C. <sup>1</sup>H NMR (400 MHz, DMSO-*d*<sub>6</sub>)  $\delta$  8.33 (d, *J* = 6.9 Hz, 1H), 7.80 (d, *J* = 7.6 Hz, 2H), 7.63 (d, *J* = 9.0 Hz, 1H), 7.48 (t, *J* = 7.5 Hz, 2H), 7.38 (t, *J* = 7.3 Hz, 1H), 7.33 – 7.28 (m, 1H), 6.96 (t, *J* = 6.8 Hz, 1H), 6.89 (d, *J* = 7.9 Hz, 2H), 6.57 (d, *J* = 8.0 Hz, 2H), 5.92 (t, *J* = 5.0 Hz, 1H), 4.61 (d, *J* =

4.5 Hz, 2H), 2.15 (s, 3H). <sup>13</sup>C NMR (101 MHz, DMSO-*d*<sub>6</sub>)  $\delta$  146.2, 144.0, 143.2, 134.4, 129.4, 128.6, 128.0, 127.6, 125.2, 124.8, 124.8, 117.6, 116.8, 112.6, 112.2, 37.2, 20.2. HR-ESI-MS (m/z): calcd for C<sub>21</sub>H<sub>20</sub>N<sub>3</sub> [M + H]<sup>+</sup>: 314.1657, found: 314.1657.

#### 4-Fluoro-*N*-((2-phenylimidazo[1,2-*a*]pyridin-3-yl)methyl)aniline (**5q**)

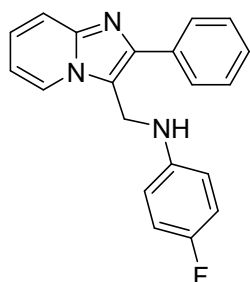

Flash column chromatography on silica gel (eluent: PE/EA = 2/1, v/v) to afford **5q**.

White solid (81.8 mg, 86%), mp 110.2-111.1 °C. <sup>1</sup>H NMR (400 MHz, CDCl<sub>3</sub>) δ 8.11 (d, *J* = 6.8 Hz, 1H), 7.76 (d, *J* = 7.1 Hz, 2H), 7.67 (d, *J* = 9.0 Hz, 1H), 7.44 (dd, *J* = 8.2, 6.6 Hz, 2H), 7.37 (t, *J* = 7.4 Hz, 1H), 7.23 (d, *J* = 7.5 Hz, 1H), 6.96 (t, *J* = 8.7 Hz, 2H), 6.84 (t, *J* = 6.8 Hz, 1H), 6.76 – 6.60 (m, 2H), 4.65 (s, 2H), 3.76 (s, 1H). <sup>13</sup>C

NMR (100 MHz, CDCl<sub>3</sub>) δ 156.4 (d, *J* = 230 Hz), 145.4, 144.8, 144.0, 134.0, 128.8, 128.6, 128.2, 125.2, 124.2, 117.6, 116.4, 116.0 (d, *J* = 22.4 Hz), 114.2 (d, *J* = 7.4 Hz), 112.8, 39.0. HR-ESI-MS (*m/z*): calcd for C<sub>20</sub>H<sub>17</sub>FN<sub>3</sub> [M + H]<sup>+</sup>: 318.1407, found: 318.1407.

#### 4-Chloro-*N*-((2-phenylimidazo[1,2-*a*]pyridin-3-yl)methyl)aniline (**5r**)

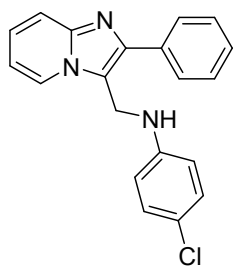

Flash column chromatography on silica gel (eluent: PE/EA = 2/1, v/v) to afford **5r**.

Yellow solid (90.9 mg, 91%), mp 191.8-192.3 °C. <sup>1</sup>H NMR (400 MHz, DMSO-*d*<sub>6</sub>) δ 8.37 (d, *J* = 7.0 Hz, 1H), 7.79 (d, *J* = 7.6 Hz, 2H), 7.66 (d, *J* = 9.0 Hz, 1H), 7.49 (t, *J* = 7.5 Hz, 2H), 7.38 (dt, *J* = 15.7, 7.8 Hz, 2H), 7.10 (d, *J* = 8.5 Hz, 2H), 7.01 (t, *J* = 6.8 Hz, 1H), 6.66 (d, *J* = 8.5 Hz, 2H), 6.35 (t, *J* = 4.7 Hz, 1H), 4.62 (d, *J* = 4.1 Hz, 2H).

<sup>13</sup>C NMR (101 MHz, DMSO-*d*<sub>6</sub>) δ 147.4, 144.2, 143.4, 134.4, 128.8, 128.6, 128.2, 127.8, 125.2, 125.2, 119.8, 117.2, 116.8, 113.8, 112.4, 37.0. HR-ESI-MS (*m/z*): calcd for C<sub>20</sub>H<sub>17</sub>ClN<sub>3</sub> [M + H]<sup>+</sup>: 334.1111, found: 334.1114.

#### 4-Bromo-*N*-((2-phenylimidazo[1,2-*a*]pyridin-3-yl)methyl)aniline (**5s**)

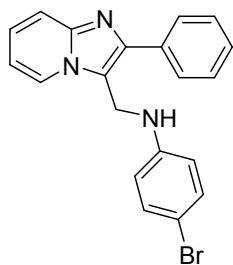

Flash column chromatography on silica gel (eluent: PE/EA = 2/1, v/v) to afford **5s**.

Yellow solid (102.9 mg, 91%), mp 165.8-166.3 °C. <sup>1</sup>H NMR (400 MHz, DMSO-*d*<sub>6</sub>) δ 8.42 (d, *J* = 6.8 Hz, 1H), 7.79 (d, *J* = 7.6 Hz, 2H), 7.70 (d, *J* = 9.1 Hz, 1H), 7.52 (d, *J* = 7.4 Hz, 2H), 7.42 (t, *J* = 7.3 Hz, 2H), 7.21 (d, *J* = 8.7 Hz, 2H), 7.07 (t, *J* = 6.7 Hz, 1H), 6.61 (d, *J* = 8.8 Hz, 2H), 6.40 (s, 1H), 4.63 (d, *J* = 3.9 Hz, 2H). <sup>13</sup>C NMR (101

MHz, DMSO-*d*<sub>6</sub>) δ 147.8, 144.2, 143.4, 134.4, 131.4, 128.6, 128.0, 127.8, 125.2, 125.0, 117.0, 116.8, 114.4, 112.2, 107.0, 37.0. HR-ESI-MS (*m/z*): calcd for C<sub>20</sub>H<sub>17</sub>BrN<sub>3</sub> [M + H]<sup>+</sup>: 378.0606, found: 378.0614.

#### 4-Methoxy-*N*-((2-phenylimidazo[1,2-*a*]pyridin-3-yl)methyl)aniline (**5t**)

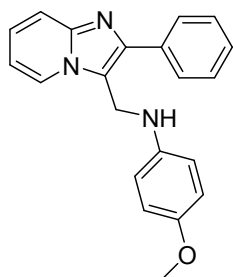

Flash column chromatography on silica gel (eluent: PE/EA = 2/1, v/v) to afford **5t**.

Brown solid (83.9 mg, 85%), mp 209.8-210.3 °C. <sup>1</sup>H NMR (400 MHz, CDCl<sub>3</sub>) δ 8.10 (d, *J* = 6.8 Hz, 1H), 7.75 (d, *J* = 7.3 Hz, 2H), 7.64 (d, *J* = 9.2 Hz, 1H), 7.41 (t, *J* = 7.6 Hz, 2H), 7.34 (t, *J* = 7.6 Hz, 1H), 7.23 – 7.17 (m, 1H), 6.84 (d, *J* = 8.7 Hz, 2H), 6.77 (d, *J* = 5.9 Hz, 1H), 6.70 (d, *J* = 8.9 Hz, 2H), 4.60 (s, 2H), 3.76 (s, 3H). <sup>13</sup>C NMR (100

Hz, CDCl<sub>3</sub>) δ 152.8, 145.0, 144.4, 141.8, 128.8, 128.4, 128.0, 125.0, 124.4, 118.8, 117.4, 116.8, 115.0, 114.6, 112.6, 55.8, 39.2. HR-ESI-MS (*m/z*): calcd for C<sub>21</sub>H<sub>20</sub>N<sub>3</sub>O [M + H]<sup>+</sup>: 330.1606, found: 330.1607.

#### *N*-((2-Phenylimidazo[1,2-*a*]pyridin-3-yl)methyl)pyridin-2-amine (**5u**)

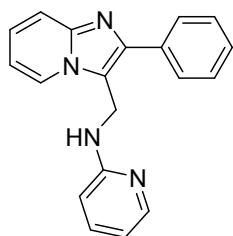

Flash column chromatography on silica gel (eluent: PE/EA = 2/1, v/v) to afford **5u**.

Brown solid (63.9 mg, 70%), mp 155.2-159.0 °C. <sup>1</sup>H NMR (400 MHz, CDCl<sub>3</sub>) δ 8.21 (d, *J* = 6.9 Hz, 1H), 8.14 (d, *J* = 5.2 Hz, 1H), 7.78 (d, *J* = 7.5 Hz, 2H), 7.65 (d, *J* = 9.0 Hz, 1H), 7.44 (q, *J* = 7.5 Hz, 3H), 7.37 (t, *J* = 7.3 Hz, 1H), 7.25 – 7.20 (m, 1H), 6.81 (t,

*J* = 6.8 Hz, 1H), 6.66 (t, *J* = 6.2 Hz, 1H), 6.44 (d, *J* = 8.4 Hz, 1H), 5.02 (d, *J* = 4.2 Hz, 2H). <sup>13</sup>C NMR (100 MHz, CDCl<sub>3</sub>) δ 157.8, 147.2, 145.2, 144.6, 138.0, 134.0, 128.8, 128.6, 128.2, 125.2, 124.6, 117.6, 117.0, 113.6, 112.6, 108.6, 35.6. HR-ESI-MS (*m/z*): calcd for C<sub>19</sub>H<sub>17</sub>N<sub>4</sub> [M + H]<sup>+</sup>: 301.1453, found: 301.1457.

#### *N,N*-Dimethyl-1-(2-phenylimidazo[1,2-*a*]pyridin-3-yl)methanamine (**7a**)

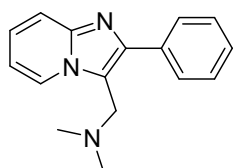

Preparative TLC (eluent: PE/EA = 1/2, v/v) to afford **7a**. Yellow liquid (36.2 mg, 48%). <sup>1</sup>H NMR (400 MHz, CDCl<sub>3</sub>) δ 8.40 (d, *J* = 5.7 Hz, 1H), 7.80 (d, *J* = 7.5 Hz, 2H), 7.63 (d, *J* = 8.0 Hz, 1H), 7.48 – 7.43 (m, 2H), 7.37 (d, *J* = 7.9 Hz, 1H), 7.25 –

7.16 (m, 1H), 6.81 (t, *J* = 6.8 Hz, 1H), 3.89 (s, 2H), 2.25 (s, 6H). <sup>13</sup>C NMR (100 MHz, CDCl<sub>3</sub>) δ 145.0, 145.0, 134.8, 129.0, 128.6, 127.8, 125.4, 124.6, 117.4, 117.4, 112.0, 53.0, 45.0. HR-ESI-MS (*m/z*): calcd for C<sub>16</sub>H<sub>18</sub>N<sub>3</sub> [M + H]<sup>+</sup>: 252.1501, found: 252.109.

#### *N,N*-Dimethyl-1-(6-methyl-2-phenylimidazo[1,2-*a*]pyridin-3-yl)methanamine (**7b**)

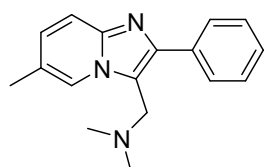

Preparative TLC (eluent: PE/EA = 1/2, v/v) to afford **7b**. Yellow solid (37.4 mg, 47%), mp 100.6-101.3 °C. <sup>1</sup>H NMR (400 MHz, CDCl<sub>3</sub>) δ 8.15 (s, 1H), 7.79 (d, *J* = 7.8 Hz, 2H), 7.56 (d, *J* = 9.1 Hz, 1H), 7.45 (t, *J* = 7.5 Hz, 2H), 7.39 – 7.33 (m, 1H),

7.08 (d,  $J = 8.9$  Hz, 1H), 3.91 (s, 2H), 2.37 (s, 3H), 2.27 (s, 6H).  $^{13}\text{C}$  NMR (100 MHz,  $\text{CDCl}_3$ )  $\delta$  144.8, 144.2, 134.8, 129.0, 128.6, 128.0, 127.8, 123.0, 121.8, 116.6, 52.8, 45.0, 18.6. HR-ESI-MS ( $m/z$ ): calcd for  $\text{C}_{17}\text{H}_{20}\text{N}_3$  [ $\text{M} + \text{H}$ ] $^+$ : 266.1657, found: 266.1656.

**1-(2-([1,1'-Biphenyl]-4-yl)imidazo[1,2-*a*]pyridin-3-yl)-*N,N*-dimethylmethanamine (7c)**

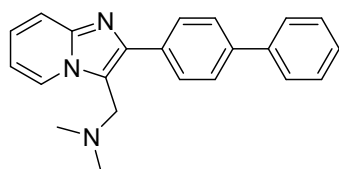

Preparative TLC (eluent: PE/EA = 1/2, v/v) to afford **7c**. Yellow solid (44.2 mg, 45%), mp 61.4-62.3 °C.  $^1\text{H}$  NMR (400 MHz,  $\text{CDCl}_3$ )  $\delta$  8.42 (d,  $J = 6.9$  Hz, 1H), 7.91 (d,  $J = 8.7$  Hz, 2H), 7.71 (d,  $J = 8.7$  Hz, 2H), 7.67 (dd,  $J = 8.5$ ,

4.6 Hz, 3H), 7.46 (t,  $J = 7.3$  Hz, 2H), 7.36 (t,  $J = 7.6$  Hz, 1H), 7.25 – 7.20 (m, 1H), 6.84 (t,  $J = 6.8$  Hz, 1H), 3.95 (s, 2H), 2.29 (s, 6H).  $^{13}\text{C}$  NMR (100 MHz,  $\text{CDCl}_3$ )  $\delta$  145.2, 144.6, 140.8, 140.4, 133.6, 129.4, 129.0, 127.4, 127.2, 127.2, 125.4, 124.8, 117.4, 112.2, 53.0, 45.0. HR-ESI-MS ( $m/z$ ): calcd for  $\text{C}_{22}\text{H}_{22}\text{N}_3$  [ $\text{M} + \text{H}$ ] $^+$ : 328.1814, found: 328.1811.

**1-(6-Chloro-2-phenylimidazo[1,2-*a*]pyridin-3-yl)-*N,N*-dimethylmethanamine (7d)**

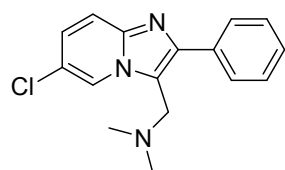

Preparative TLC (eluent: PE/EA = 1/2, v/v) to afford **7d**. Yellow solid (39.3mg, 46%), mp 101.6-102.4 °C.  $^1\text{H}$  NMR (400 MHz,  $\text{CDCl}_3$ )  $\delta$  8.50 (s, 1H), 7.76 (d,  $J = 7.6$  Hz, 2H), 7.57 (d,  $J = 9.5$  Hz, 1H), 7.49 – 7.42 (m, 2H), 7.39 (d,  $J = 7.9$  Hz,

1H), 7.18 (d,  $J = 9.5$  Hz, 1H), 3.89 (s, 2H), 2.26 (s, 6H).  $^{13}\text{C}$  NMR (100 MHz,  $\text{CDCl}_3$ )  $\delta$  146.0, 143.4, 134.2, 129.0, 128.6, 128.0, 126.0, 123.6, 120.0, 117.8, 117.6, 53.0, 45.0. HR-ESI-MS ( $m/z$ ): calcd for  $\text{C}_{16}\text{H}_{17}\text{ClN}_3$  [ $\text{M} + \text{H}$ ] $^+$ : 286.1111, found: 286.1116.

**1-(2-(4-Chlorophenyl)imidazo[1,2-*a*]pyridin-3-yl)-*N,N*-dimethylmethanamine (7e)**

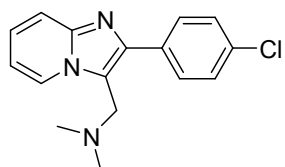

Preparative TLC (eluent: PE/EA = 1/2, v/v) to afford **7e**. Yellow liquid (35.0 mg, 41%).  $^1\text{H}$  NMR (400 MHz,  $\text{CDCl}_3$ )  $\delta$  7.79 (d,  $J = 7.3$  Hz, 2H), 7.62 (d,  $J = 7.0$  Hz, 1H), 7.43 (dd,  $J = 14.0$ , 6.7 Hz, 3H), 7.33 (t,  $J = 7.4$  Hz, 1H), 6.94 – 6.90 (m, 2H),

6.63 – 6.60 (m, 2H), 6.56 (d,  $J = 5.4$  Hz, 1H), 4.35 (s, 2H), 3.47 (s, 2H), 2.68 (q,  $J = 7.6$  Hz, 2H), 1.27 (t,  $J = 7.5$  Hz, 3H).  $^{13}\text{C}$  NMR (100 MHz,  $\text{CDCl}_3$ )  $\delta$  145.04, 143.65, 133.66, 133.20, 130.14, 128.67, 125.34, 124.79, 117.57, 117.24, 112.07, 52.79, 45.03. HR-ESI-MS ( $m/z$ ): calcd for  $\text{C}_{16}\text{H}_{17}\text{ClN}_3$  [ $\text{M} + \text{H}$ ] $^+$ : 286.1111, found: 286.1113.

### 1-(2-(3-Methoxyphenyl)imidazo[1,2-*a*]pyridin-3-yl)-*N,N*-dimethylmethanamine (7f)

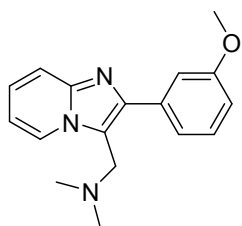

Preparative TLC (eluent: PE/EA = 1/2, v/v) to afford **7f**. Yellow liquid (38.8 mg, 46%). <sup>1</sup>H NMR (400 MHz, CDCl<sub>3</sub>) δ 8.39 (d, *J* = 6.9 Hz, 1H), 7.63 (d, *J* = 9.0 Hz, 1H), 7.40 – 7.34 (m, 3H), 7.23 – 7.18 (m, 1H), 6.92 (dt, *J* = 5.9, 2.8 Hz, 1H), 6.82 (t, *J* = 6.8 Hz, 1H), 3.90 (s, 2H), 3.88 (s, 3H), 2.26 (s, 6H). <sup>13</sup>C NMR (100 MHz, CDCl<sub>3</sub>)

δ 159.8, 145.0, 144.8, 136.0, 129.6, 125.4, 124.8, 121.4, 117.4, 117.4, 114.2, 114.0, 112.0, 55.4, 52.8, 45.0.

HR-ESI-MS (*m/z*): calcd for C<sub>17</sub>H<sub>20</sub>N<sub>3</sub>O [M + H]<sup>+</sup>: 282.1606, found: 282.1598.

### 1-(6-Chloro-2-(*p*-tolyl)imidazo[1,2-*a*]pyridin-3-yl)-*N,N*-dimethylmethanamine (7g)

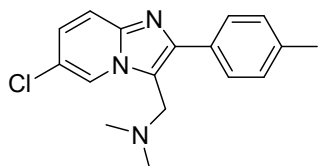

Preparative TLC (eluent: PE/EA = 1/2, v/v) to afford **7g**. Yellow liquid (35.9 mg, 40%). <sup>1</sup>H NMR (400 MHz, CDCl<sub>3</sub>) δ 8.39 (d, *J* = 7.3 Hz, 1H), 7.70 – 7.59 (m, 3H), 7.28 (s, 2H), 6.80 (dd, *J* = 7.3, 2.1 Hz, 1H), 3.91 (s, 2H), 2.41 (s, 3H),

2.25 (s, 6H). <sup>13</sup>C NMR (100 MHz, CDCl<sub>3</sub>) δ 146.0, 144.8, 138.0, 131.4, 131.2, 129.4, 128.8, 126.0, 116.0,

113.6, 52.8, 44.8, 21.4. HR-ESI-MS (*m/z*): calcd for C<sub>17</sub>H<sub>19</sub>ClN<sub>3</sub> [M + H]<sup>+</sup>: 300.1268, found: 300.1266.

### 2-((2-Phenylimidazo[1,2-*a*]pyridin-3-yl)methoxy)ethan-1-ol (8a)

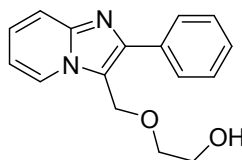

Preparative TLC (eluent: PE/EA = 1/2, v/v) to afford **8a**. Yellow solid (35.4 mg, 44%), mp 98.1-98.6 °C. <sup>1</sup>H NMR (400 MHz, CDCl<sub>3</sub>) δ 8.14 (d, *J* = 6.9 Hz, 1H), 7.70 (d, *J* = 7.6 Hz, 2H), 7.60 (d, *J* = 9.1 Hz, 1H), 7.40 (t, *J* = 7.5 Hz, 2H), 7.34 (t, *J* = 7.3

Hz, 1H), 7.18 – 7.09 (m, 1H), 6.81 – 6.71 (m, 1H), 4.87 (d, *J* = 3.0 Hz, 2H), 3.74 (t, *J* = 4.6 Hz, 2H), 3.58 (t, *J* = 4.5 Hz, 2H), 3.32 (s, 1H). <sup>13</sup>C NMR (100 MHz, CDCl<sub>3</sub>) δ 145.4, 145.2, 133.8, 128.8, 128.6, 128.2, 125.2,

124.4, 117.4, 116.8, 112.6, 71.4, 62.4, 61.6. HR-ESI-MS (*m/z*): calcd for C<sub>16</sub>H<sub>17</sub>N<sub>2</sub>O<sub>2</sub> [M + H]<sup>+</sup>: 269.1290, found: 269.1290.

### 2-((2-(*Tert*-butyl)imidazo[1,2-*a*]pyridin-3-yl)methoxy)ethan-1-ol (8b)

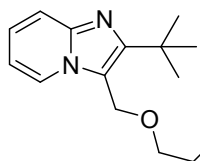

Preparative TLC (eluent: PE/EA = 1/2, v/v) to afford **8b**. Yellow liquid (30.5mg, 41%). <sup>1</sup>H NMR (400 MHz, CDCl<sub>3</sub>) δ 8.11 (d, *J* = 6.8 Hz, 1H), 7.58 (d, *J* = 9.0 Hz, 1H), 7.18 – 7.11 (m, 1H), 6.77 (t, *J* = 6.8 Hz, 1H), 4.98 (s, 2H), 3.79 – 3.71 (m, 2H),

3.68 – 3.58 (m, 2H), 1.47 (s, 9H). <sup>13</sup>C NMR (100 MHz, CDCl<sub>3</sub>) δ 154.0, 143.8, 124.6, 124.0, 117.0, 115.2,



112.4, 71.2, 62.8, 62.0, 33.6, 31.4. HR-ESI-MS (m/z): calcd for C<sub>14</sub>H<sub>21</sub>N<sub>2</sub>O<sub>2</sub> [M + H]<sup>+</sup>: 249.1603, found: 249.1609.

**2-(2,4-Dichlorophenoxy)-N-(4-((2-phenylimidazo[1,2-a]pyridin-3-yl)methyl)phenyl)acetamide (10a)**

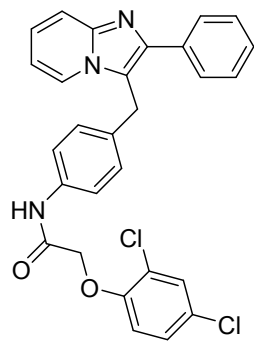

Flash column chromatography on silica gel (eluent: PE/EA = 1/2, v/v) to afford **10a**.

Brown solid (126.5 mg, 84%), mp 67.8-68.4 °C. <sup>1</sup>H NMR (400 MHz, CDCl<sub>3</sub>) δ 8.57 (s, 1H), 7.77 (d, *J* = 7.5 Hz, 2H), 7.71 – 7.68 (m, 2H), 7.54 (d, *J* = 8.2 Hz, 2H), 7.45 – 7.40 (m, 3H), 7.36 (d, *J* = 7.3 Hz, 1H), 7.24 – 7.21 (m, 1H), 7.18 (d, *J* = 8.4 Hz, 1H), 7.14 (d, *J* = 8.2 Hz, 2H), 6.88 (d, *J* = 8.7 Hz, 1H), 6.72 (t, *J* = 6.8 Hz, 1H), 4.61 (s, 2H), 4.48 (s, 2H). <sup>13</sup>C NMR (100 MHz, CDCl<sub>3</sub>) δ 165.2, 151.4, 145.0, 144.0,

135.8, 134.4, 133.4, 130.4, 128.8, 128.6, 128.4, 128.0, 128.0, 124.6, 124.0, 123.4, 120.8, 117.6, 115.0, 112.6, 68.6, 29.4. HR-ESI-MS (m/z): calcd for C<sub>28</sub>H<sub>22</sub>Cl<sub>2</sub>N<sub>3</sub>O<sub>2</sub> [M + H]<sup>+</sup>: 502.1089, found: 502.1089.

**5-Methyl-1-phenyl-N-(4-((2-phenylimidazo[1,2-a]pyridin-3-yl)methyl)phenyl)-1H-pyrazole-3-carboxamide (10b)**

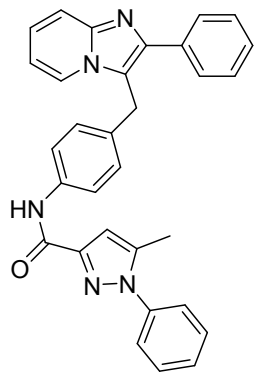

Flash column chromatography on silica gel (eluent: PE/EA = 1/2, v/v) to afford **10b**.

Yellow solid (124.7 mg, 86%), mp 165.8-166.6 °C. <sup>1</sup>H NMR (400 MHz, CDCl<sub>3</sub>) δ 8.75 – 8.45 (m, 1H), 8.21 (d, *J* = 6.7 Hz, 1H), 7.71 (d, *J* = 7.6 Hz, 2H), 7.66 (dd, *J* = 8.3, 4.6 Hz, 2H), 7.51 – 7.46 (m, 2H), 7.46 – 7.35 (m, 7H), 7.31 (t, *J* = 7.2 Hz, 1H), 7.19 – 7.12 (m, 1H), 7.07 – 6.91 (m, 2H), 6.68 (t, *J* = 7.0 Hz, 1H), 4.41 (s, 2H), 2.60 (s, 3H). <sup>13</sup>C NMR (100 MHz, CDCl<sub>3</sub>) δ 162.4, 144.8, 143.8, 143.2, 138.8, 137.2, 134.2, 132.0, 129.4, 128.6, 128.2, 128.0, 128.0, 125.6, 124.6, 123.6, 121.2, 118.0,

117.2, 116.0, 112.4, 29.2, 12.2. HR-ESI-MS (m/z): calcd for C<sub>31</sub>H<sub>26</sub>N<sub>5</sub>O [M + H]<sup>+</sup>: 484.2137, found: 484.2139.

**2-Methyl-3-(2-((4-((2-phenylimidazo[1,2-a]pyridin-3-yl)methyl)phenyl)amino)ethyl)-6,7,8,9-tetrahydro-4H-pyrido[1,2-a]pyrimidin-4-one (10c)**

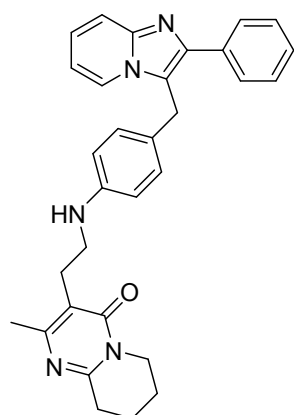

**2-Methyl-3-(2-((4-((2-phenylimidazo[1,2-a]pyridin-3-yl)methyl)phenyl)amino)ethyl)-6,7,8,9-tetrahydro-4H-pyrido[1,2-a]pyrimidin-4-one (10c)**

Flash column chromatography on silica gel (eluent: PE/EA = 1/2, v/v) to afford **10c**. Brown solid (104.2 mg, 71%), mp 71.4-71.9 °C. <sup>1</sup>H NMR (400 MHz, CDCl<sub>3</sub>) δ <sup>1</sup>H NMR (400 MHz, Chloroform-*d*) δ 7.79 (d, *J* = 7.6 Hz, 2H), 7.71 (d,

$J = 6.9$  Hz, 1H), 7.66 (d,  $J = 9.1$  Hz, 1H), 7.41 (t,  $J = 7.4$  Hz, 2H), 7.32 (t,  $J = 7.4$  Hz, 1H), 7.14 (t,  $J = 7.9$  Hz, 1H), 6.91 (d,  $J = 8.0$  Hz, 2H), 6.67 (t,  $J = 6.8$  Hz, 1H), 6.54 (d,  $J = 8.0$  Hz, 2H), 4.35 (s, 2H), 3.90 (t,  $J = 6.1$  Hz, 2H), 3.26 (t,  $J = 6.7$  Hz, 2H), 2.83 (t,  $J = 6.7$  Hz, 4H), 2.24 (s, 3H), 1.93 (t,  $J = 6.2$  Hz, 2H), 1.83 (t,  $J = 6.3$  Hz, 2H).  $^{13}\text{C}$  NMR (100 MHz,  $\text{CDCl}_3$ )  $\delta$  163.4, 158.8, 156.2, 147.2, 144.8, 143.6, 134.6, 128.6, 128.6, 128.2, 127.6, 124.4, 124.2, 123.8, 119.0, 118.6, 117.4, 113.0, 112.2, 43.2, 43.0, 31.6, 29.0, 26.2, 22.0, 21.4, 19.2. HR-ESI-MS ( $m/z$ ): calcd for  $\text{C}_{31}\text{H}_{35}\text{N}_6\text{O}$  [ $\text{M} + \text{NH}_4$ ] $^+$ : 506.2920, found: 506.2920.

***N*-(4-((2-Phenylimidazo[1,2-*a*]pyridin-3-yl)methyl)phenyl)-7*H*-pyrrolo[2,3-*d*]pyrimidin-4-amine (10d)**

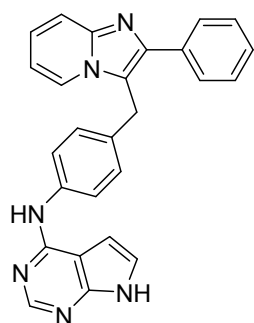

Flash column chromatography on silica gel (eluent: PE/EA = 1/2, v/v) to afford **10d**.

Yellow solid (81.2 mg, 65%), mp 107.1-107.7 °C.  $^1\text{H}$  NMR (400 MHz, Methanol- $d_4$ )

$\delta$  8.16 (s, 1H), 8.02 (d,  $J = 6.9$  Hz, 1H), 7.74 (d,  $J = 7.6$  Hz, 2H), 7.61 (d,  $J = 8.4$  Hz, 3H), 7.46 (t,  $J = 7.5$  Hz, 2H), 7.39 (d,  $J = 7.3$  Hz, 1H), 7.34 – 7.29 (m, 1H), 7.13 (d,  $J = 3.6$  Hz, 1H), 7.09 (d,  $J = 8.1$  Hz, 2H), 6.87 (t,  $J = 6.8$  Hz, 1H), 6.63 (d,  $J = 3.5$  Hz, 1H), 4.50 (s, 2H).  $^{13}\text{C}$  NMR (101 MHz, Methanol- $d_4$ )  $\delta$  155.8, 151.8, 151.4,

146.0, 144.2, 139.6, 135.2, 133.2, 129.8, 129.4, 129.0, 126.6, 125.4, 123.6, 123.2, 120.2, 117.2, 113.8, 105.2, 100.0, 29.6. HR-ESI-MS ( $m/z$ ): calcd for  $\text{C}_{26}\text{H}_{21}\text{N}_6$  [ $\text{M} + \text{H}$ ] $^+$ : 417.1828, found: 417.1829.

***N*-(4-((2-Phenylimidazo[1,2-*a*]pyridin-3-yl)methyl)phenyl)-7*H*-pyrrolo[2,3-*d*]pyrimidin-4-amine (10e)**

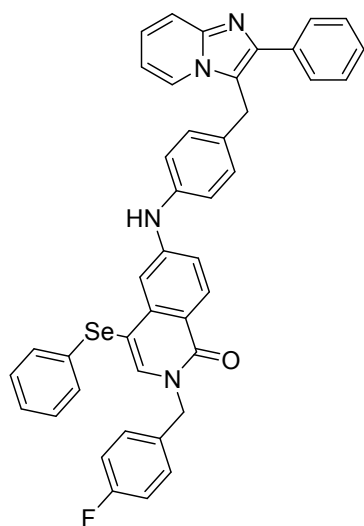

Flash column chromatography on silica gel (eluent: PE/EA = 1/2, v/v) to afford **10e**. Yellow solid (135.5 mg, 64%), mp 208.2-208.7 °C.  $^1\text{H}$  NMR

(400 MHz,  $\text{CDCl}_3$ )  $\delta$  8.27 (d,  $J = 8.7$  Hz, 1H), 7.80 (d,  $J = 7.7$  Hz, 2H), 7.72 (d,  $J = 8.0$  Hz, 2H), 7.62 (s, 1H), 7.44 (t,  $J = 7.6$  Hz, 2H), 7.38 – 7.30 (m, 4H), 7.24 – 7.19 (m, 1H), 7.05 (d,  $J = 8.1$  Hz, 2H), 7.03 – 6.97 (m, 6H), 6.87 (d,  $J = 8.1$  Hz, 2H), 6.82 – 6.72 (m, 3H), 6.52 (d,  $J = 4.9$  Hz, 1H), 5.14 (s, 2H), 4.42 (s, 2H).  $^{13}\text{C}$  NMR (100 MHz,  $\text{CDCl}_3$ )  $\delta$  163.8, 161.8, 161.2, 147.8, 144.8, 143.8, 140.0, 139.6, 139.4, 134.4, 132.6(d,  $J = 3.3$  Hz), 132.0, 130.8, 130.4, 129.8(d,  $J = 8.2$  Hz), 129.4, 129.2, 128.8,

128.6, 128.2, 128.0, 126.4, 124.6, 123.6, 120.4, 119.0, 118.0, 117.6, 117.2, 115.8 (d,  $J = 21.6$  Hz), 112.4, 110.2, 104.2, 51.0, 29.2. HR-ESI-MS ( $m/z$ ): calcd for  $\text{C}_{42}\text{H}_{32}\text{FN}_4\text{OSe}$  [ $\text{M} + \text{H}$ ] $^+$ : 707.1725, found: 707.1733.

#### 4-Phenyl-N-(4-((2-phenylimidazo[1,2-a]pyridin-3-yl)methyl)phenyl)quinazolin-2-amine (10f)

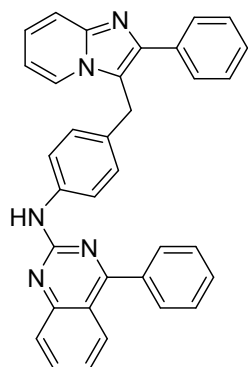

Flash column chromatography on silica gel (eluent: PE/EA = 1/2, v/v) to afford **10f**.

Yellow solid (98.1 mg, 65%), mp 107.9-108.4 °C. <sup>1</sup>H NMR (400 MHz, CDCl<sub>3</sub>) δ 7.86 (dd, *J* = 11.8, 8.0 Hz, 3H), 7.78 (d, *J* = 8.3 Hz, 3H), 7.74 – 7.67 (m, 6H), 7.53 (s, 3H), 7.44 (t, *J* = 7.5 Hz, 2H), 7.36 (d, *J* = 7.3 Hz, 1H), 7.23 (d, *J* = 7.6 Hz, 1H), 7.14 (dd, *J* = 17.6, 8.2 Hz, 3H), 6.68 (t, *J* = 6.3 Hz, 1H), 4.45 (s, 2H). <sup>13</sup>C NMR (100 MHz, CDCl<sub>3</sub>) δ 170.0, 156.2, 152.6, 144.8, 144.0, 138.8, 137.0, 134.6, 134.0, 130.2, 130.0, 129.6, 128.6, 128.6, 128.2, 128.2, 127.8, 127.4, 126.8, 124.2, 123.6, 123.6, 119.4,

119.0, 118.0, 117.4, 112.2, 29.4. HR-ESI-MS (*m/z*): calcd for C<sub>34</sub>H<sub>29</sub>N<sub>6</sub> [M + NH<sub>4</sub>]<sup>+</sup>: 520.2501, found: 520.2509.

#### 4-(4-(Pyrrolidin-1-yl)benzyl)aniline (12f)

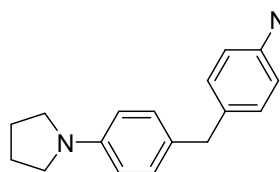

The synthesis method is the same as **4a**. Flash column chromatography on silica gel (eluent: PE/EA = 3/1, v/v) to afford **12f**. Yellow solid (57.5 mg, 76%), mp 145.2-145.8 °C. <sup>1</sup>H NMR (400 MHz, CDCl<sub>3</sub>) δ 7.05 (d, *J* = 8.2 Hz, 2H), 6.98 (d, *J* = 8.0 Hz, 2H), 6.62 (d, *J* = 8.2 Hz, 2H), 6.52 (d, *J* = 8.4 Hz, 2H), 3.80 (s, 2H), 3.30 – 3.23 (m, 4H), 2.02 – 1.94 (m, 4H). <sup>13</sup>C NMR (100 MHz, CDCl<sub>3</sub>) δ 146.4, 144.2, 132.6,

129.6, 129.6, 128.8, 115.4, 111.8, 47.8, 40.2, 25.6. HR-ESI-MS (*m/z*): calcd for C<sub>17</sub>H<sub>21</sub>N<sub>2</sub> [M + NH<sub>3</sub>]<sup>+</sup>: 253.1621, found: 253.1625.

### 3. NMR spectra for new compounds

$^1\text{H}$  NMR and  $^{13}\text{C}$  NMR spectrum of compound **3a**

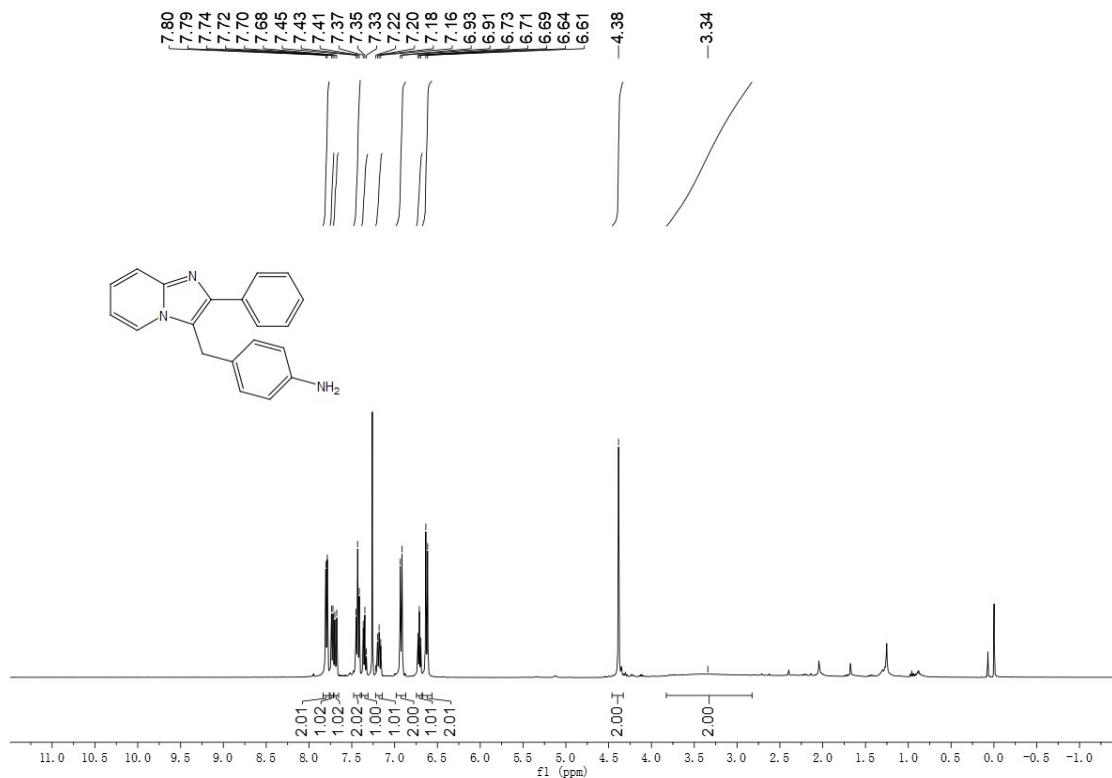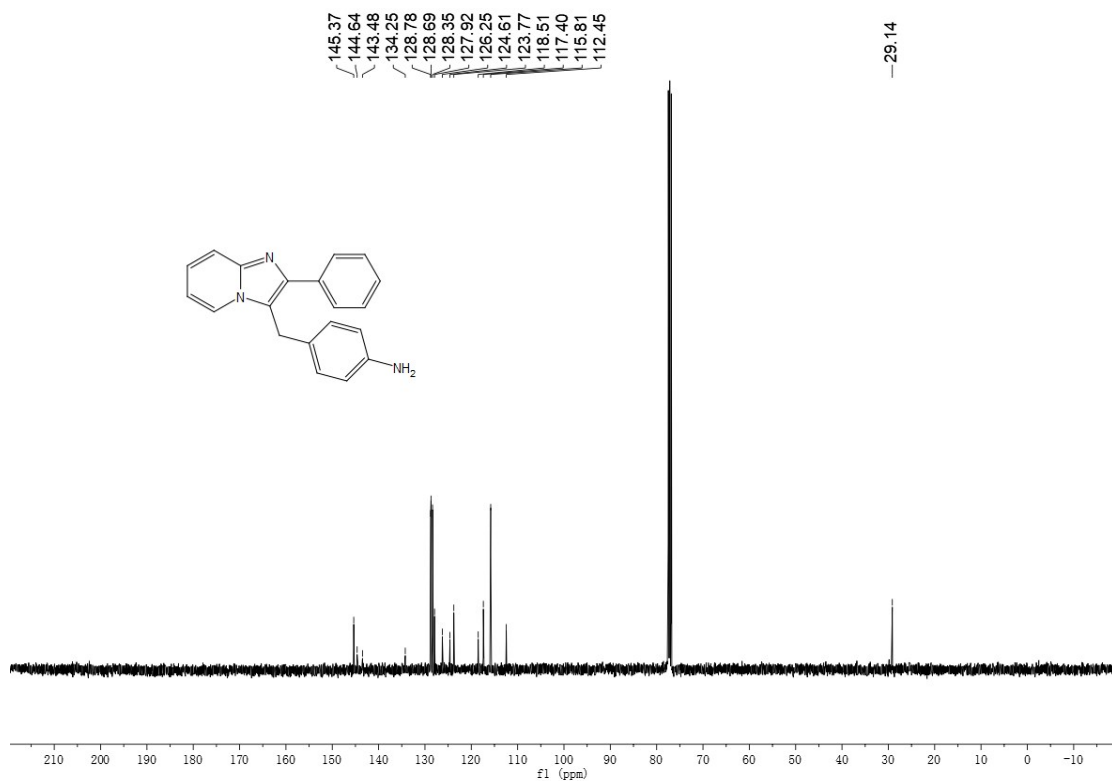

$^1\text{H}$  NMR and  $^{13}\text{C}$  NMR spectrum of compound **3b**

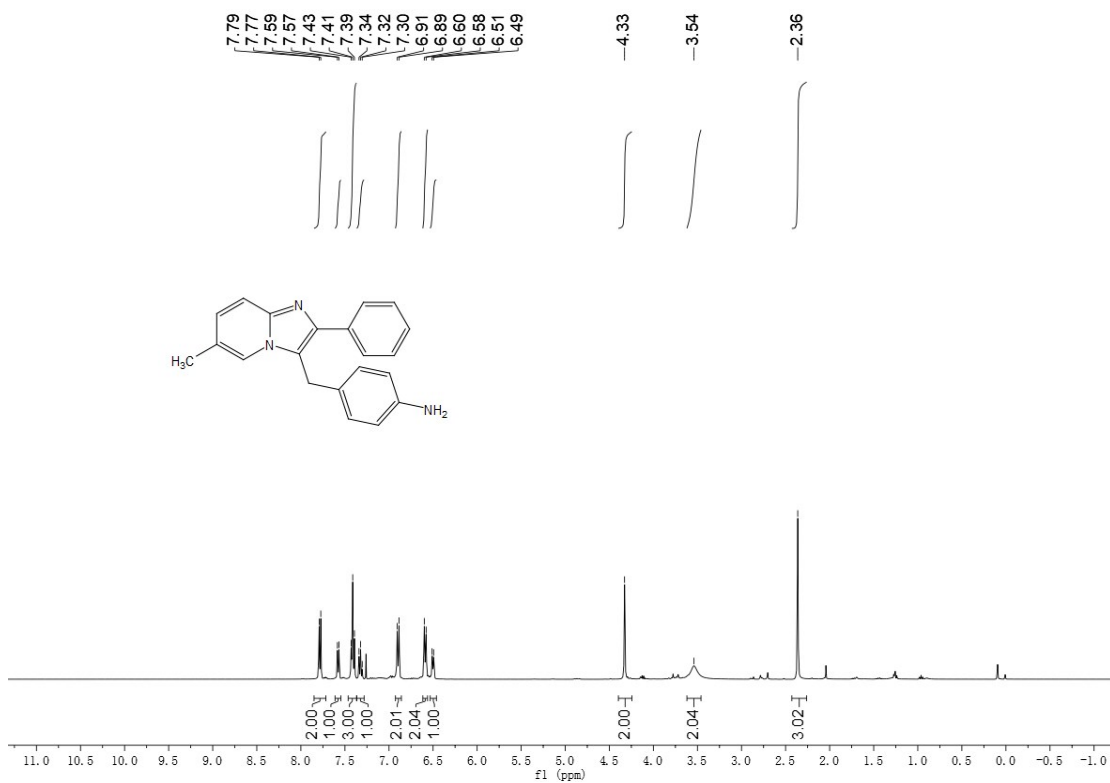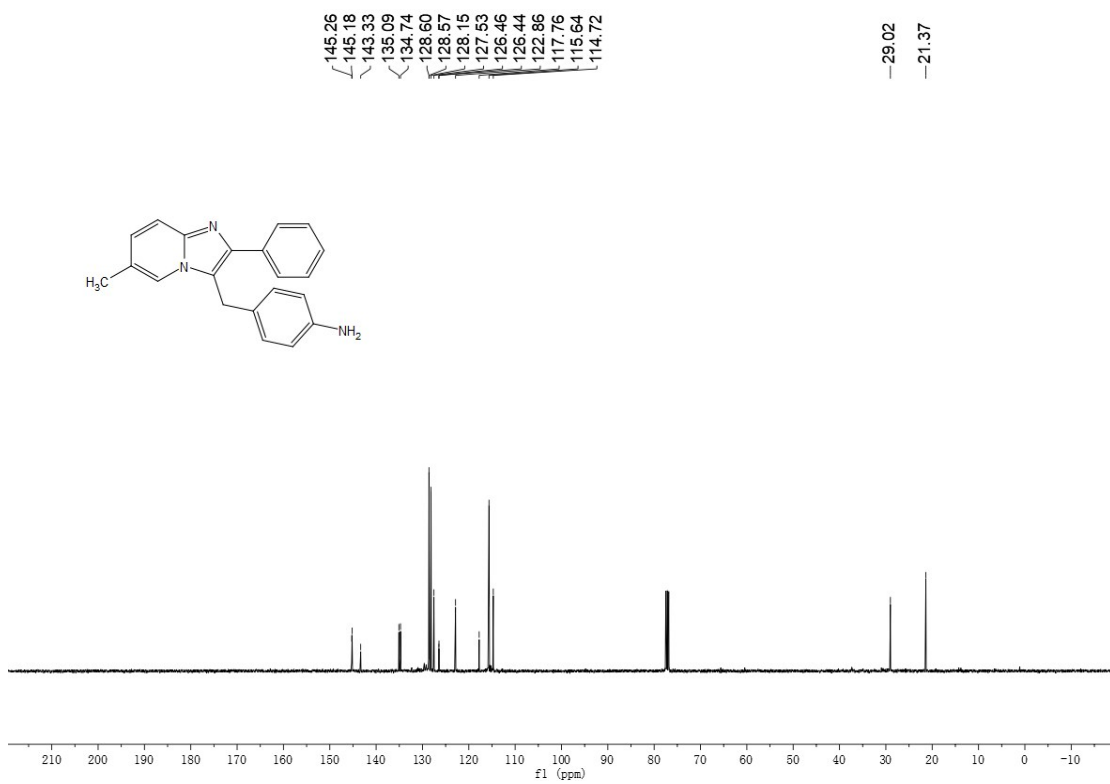

$^1\text{H}$  NMR and  $^{13}\text{C}$  NMR spectrum of compound **3c**

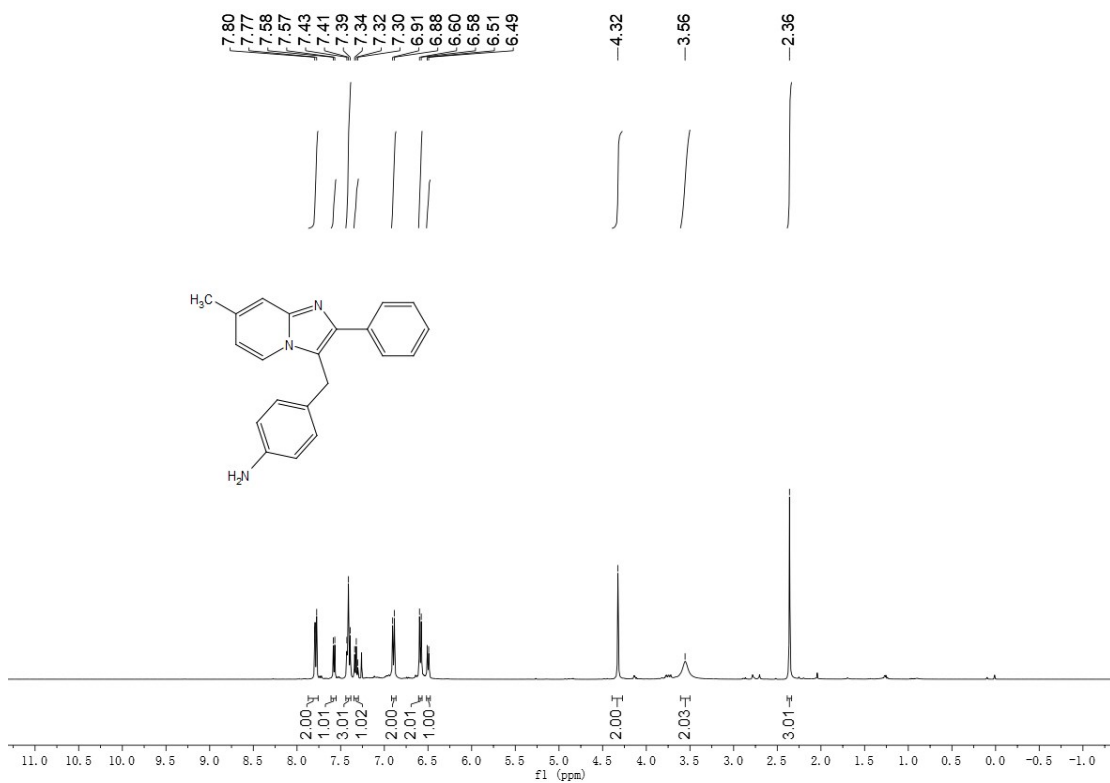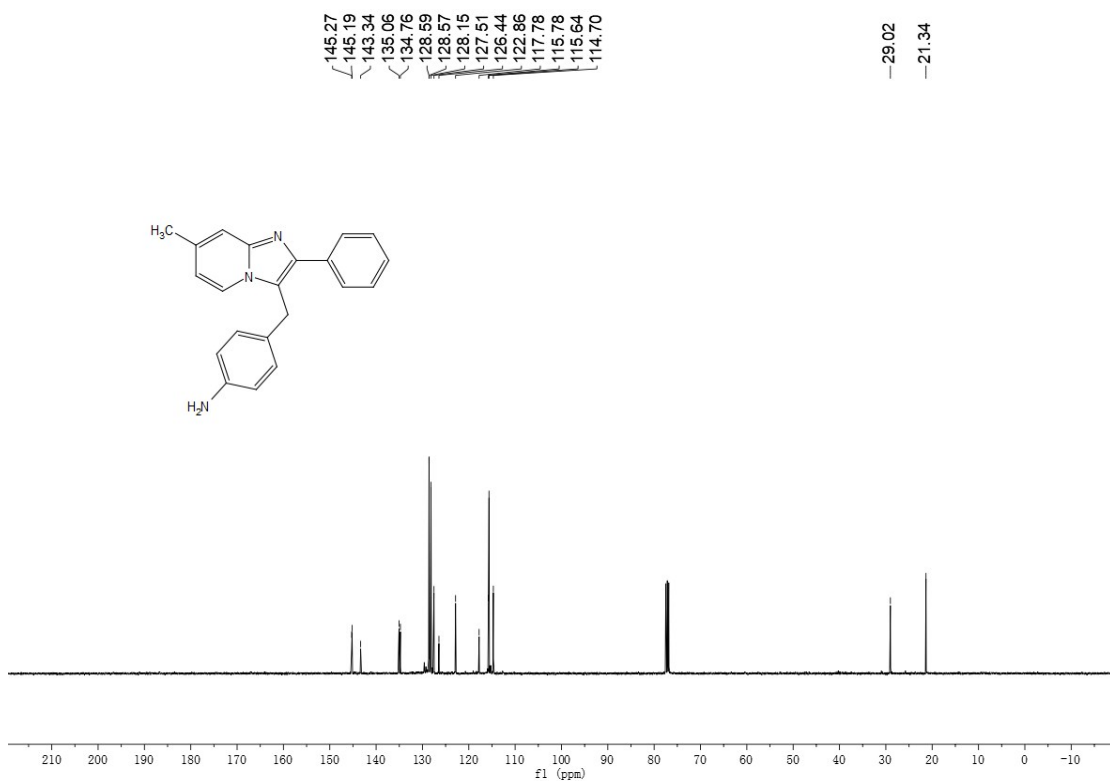

# <sup>1</sup>H NMR and <sup>13</sup>C NMR spectrum of compound **3d**

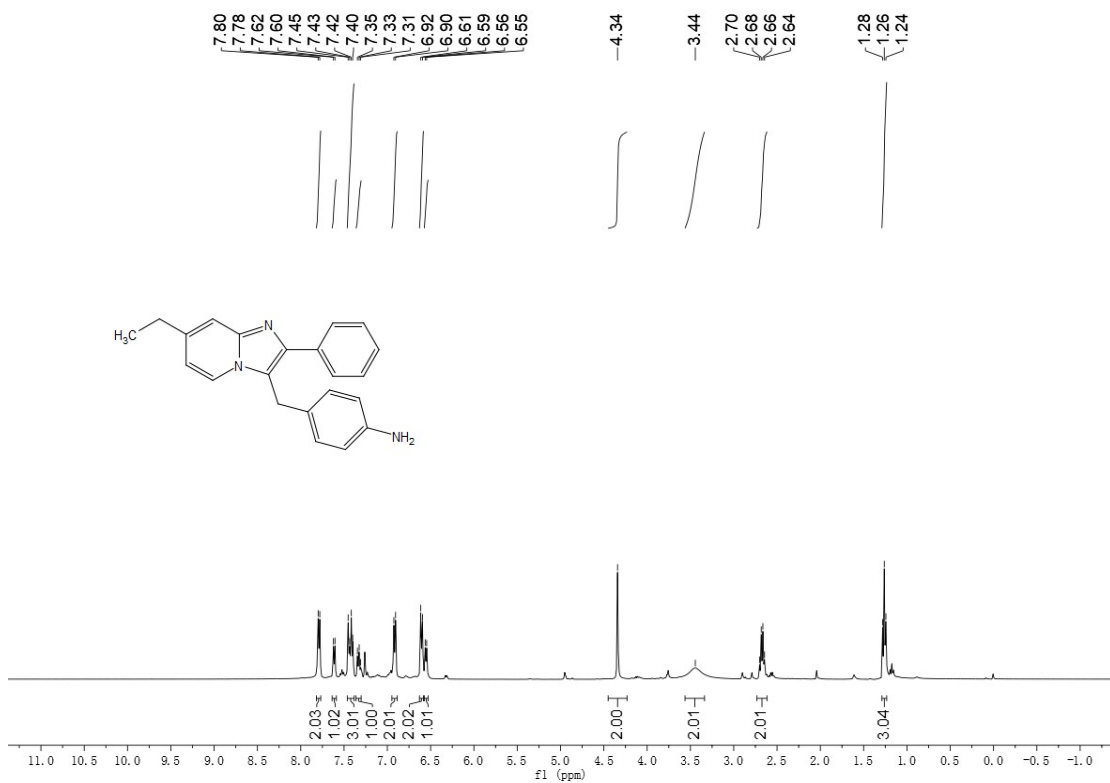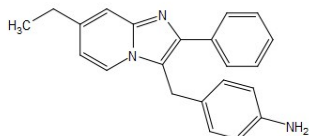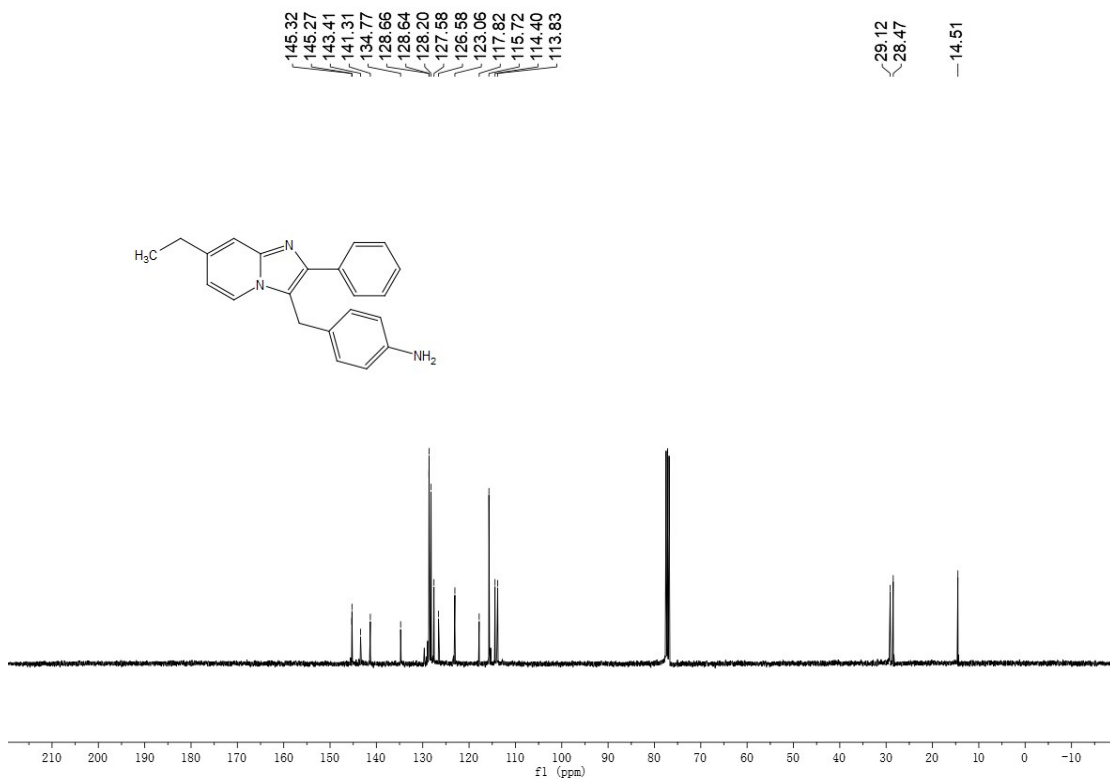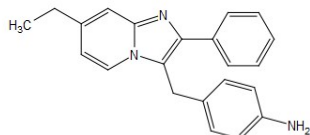

# $^1\text{H}$ NMR and $^{13}\text{C}$ NMR spectrum of compound **3e**

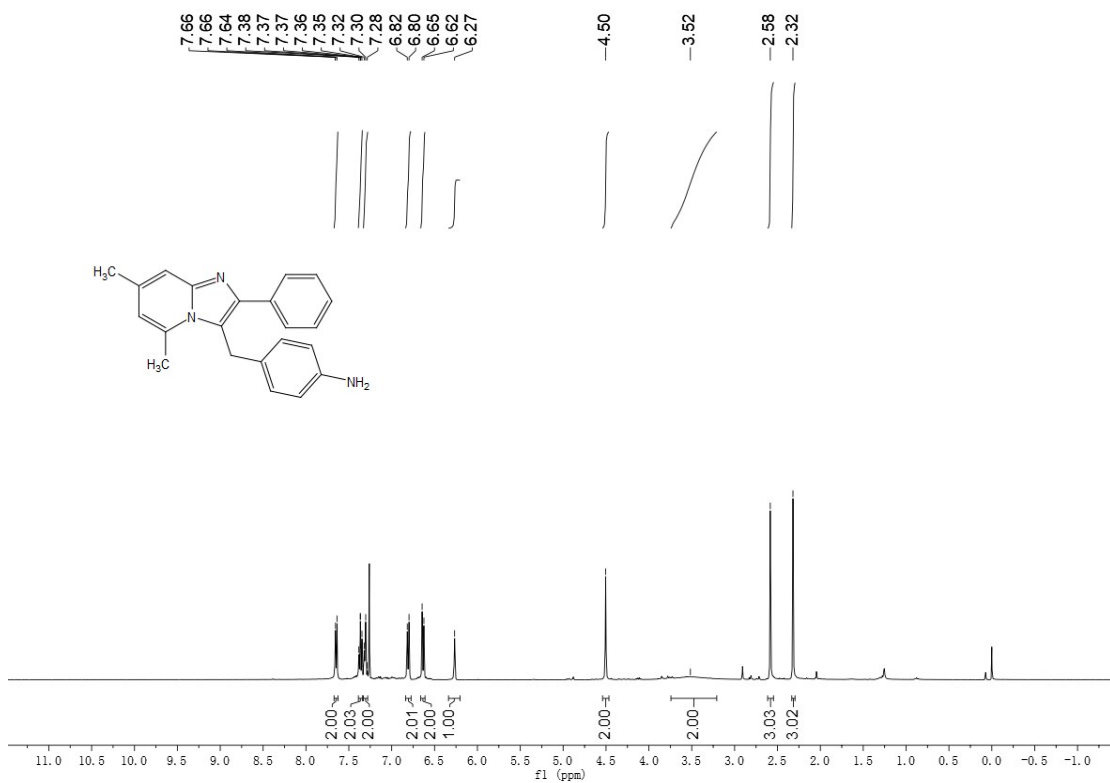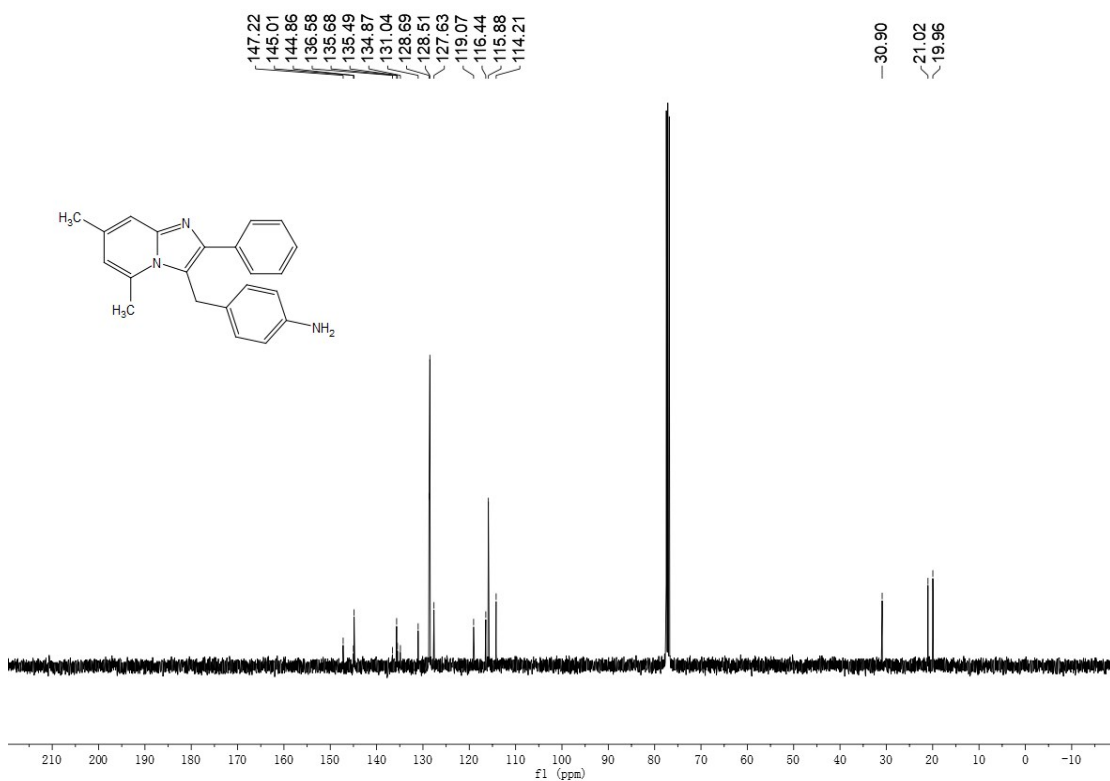



# $^1\text{H}$ NMR and $^{13}\text{C}$ NMR spectrum of compound **3f**

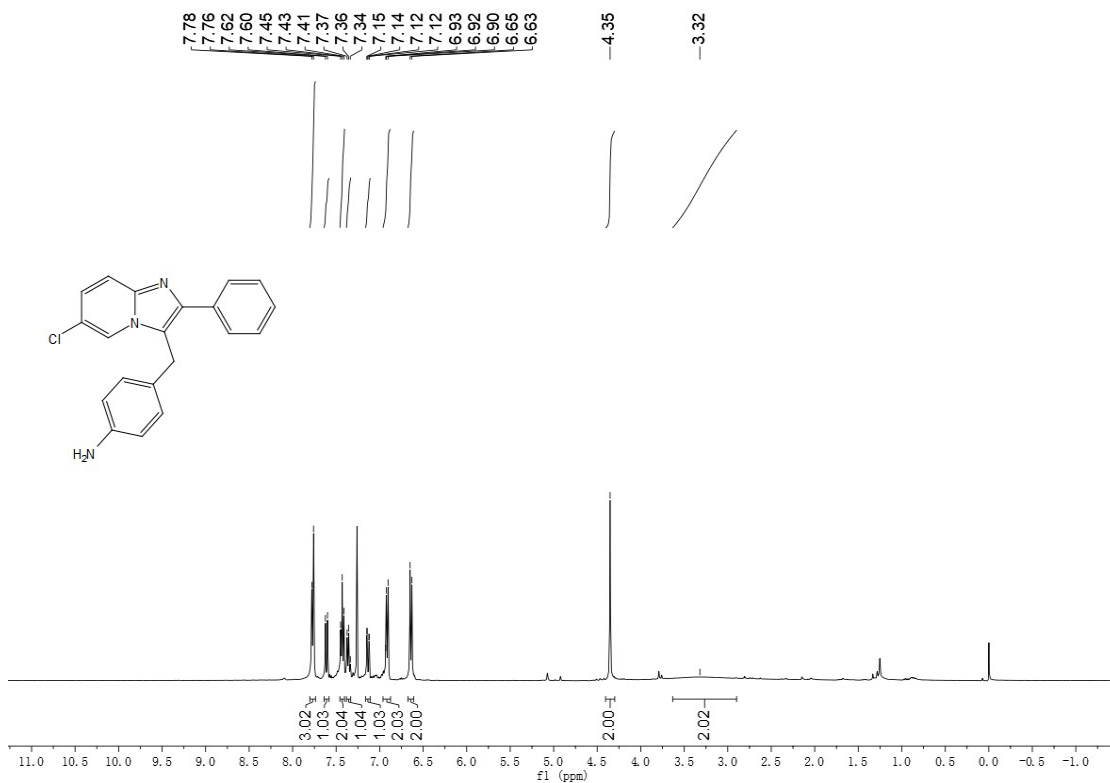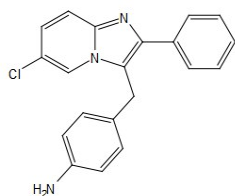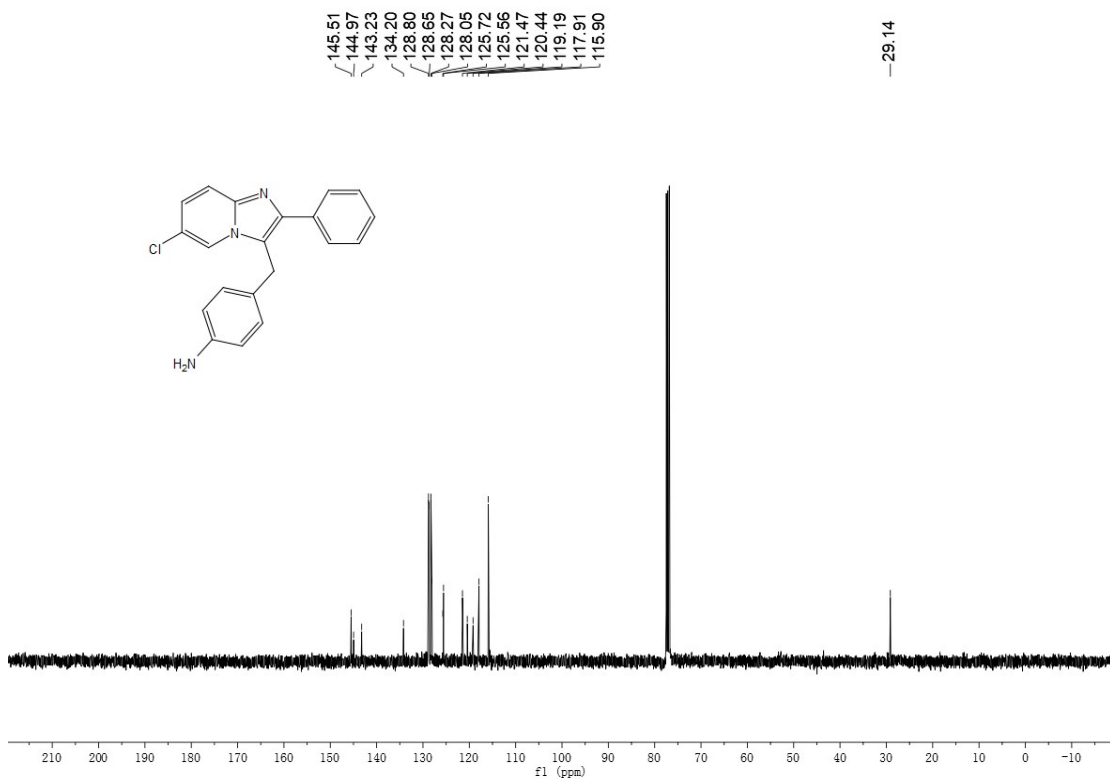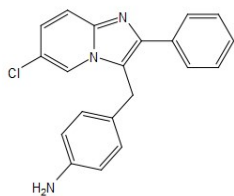

$^1\text{H}$  NMR and  $^{13}\text{C}$  NMR spectrum of compound **3g**

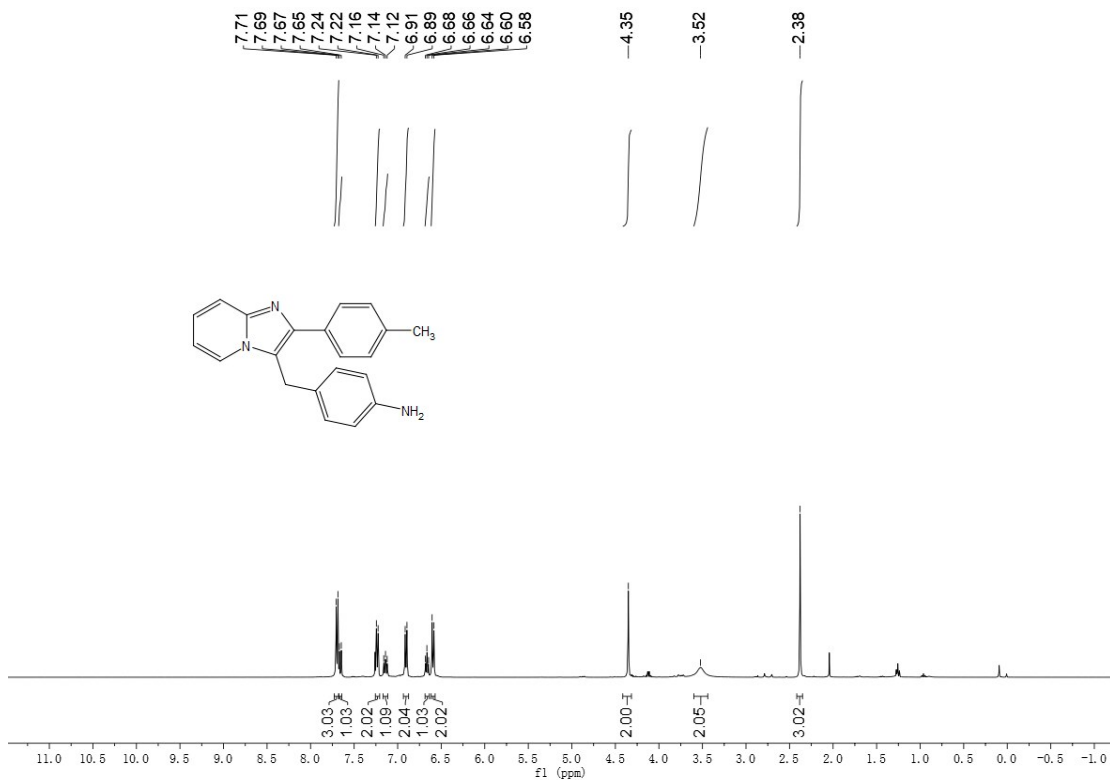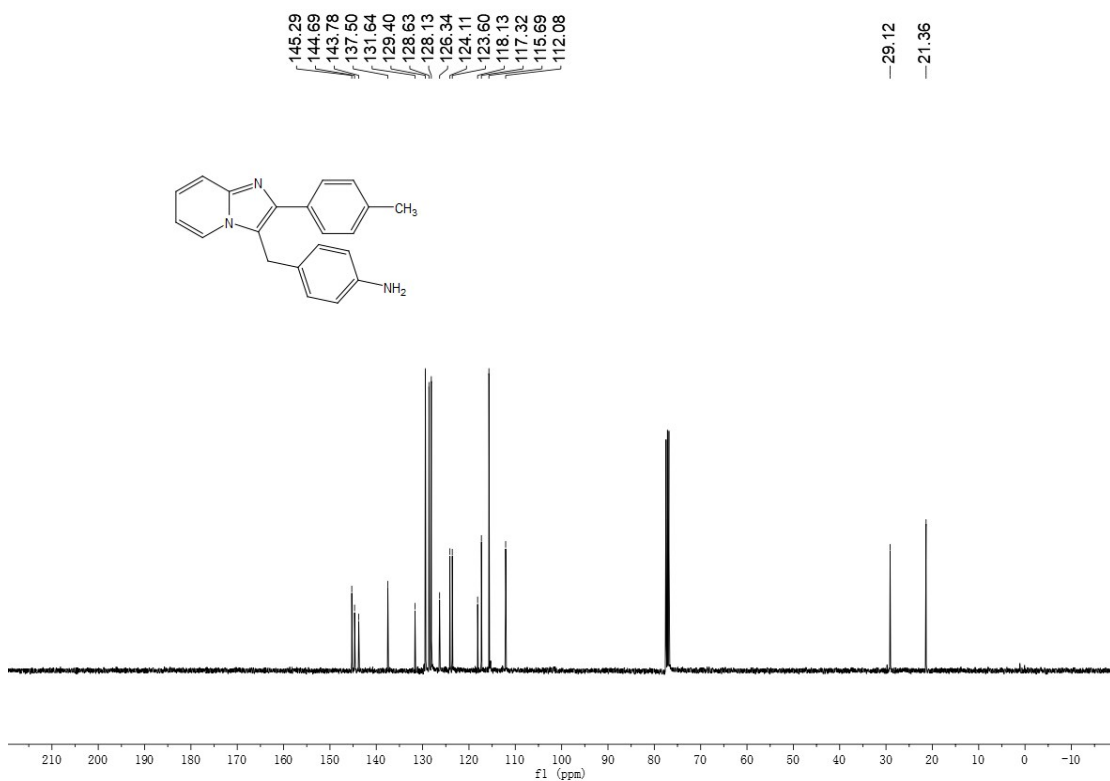

$^1\text{H}$  NMR and  $^{13}\text{C}$  NMR spectrum of compound **3h**

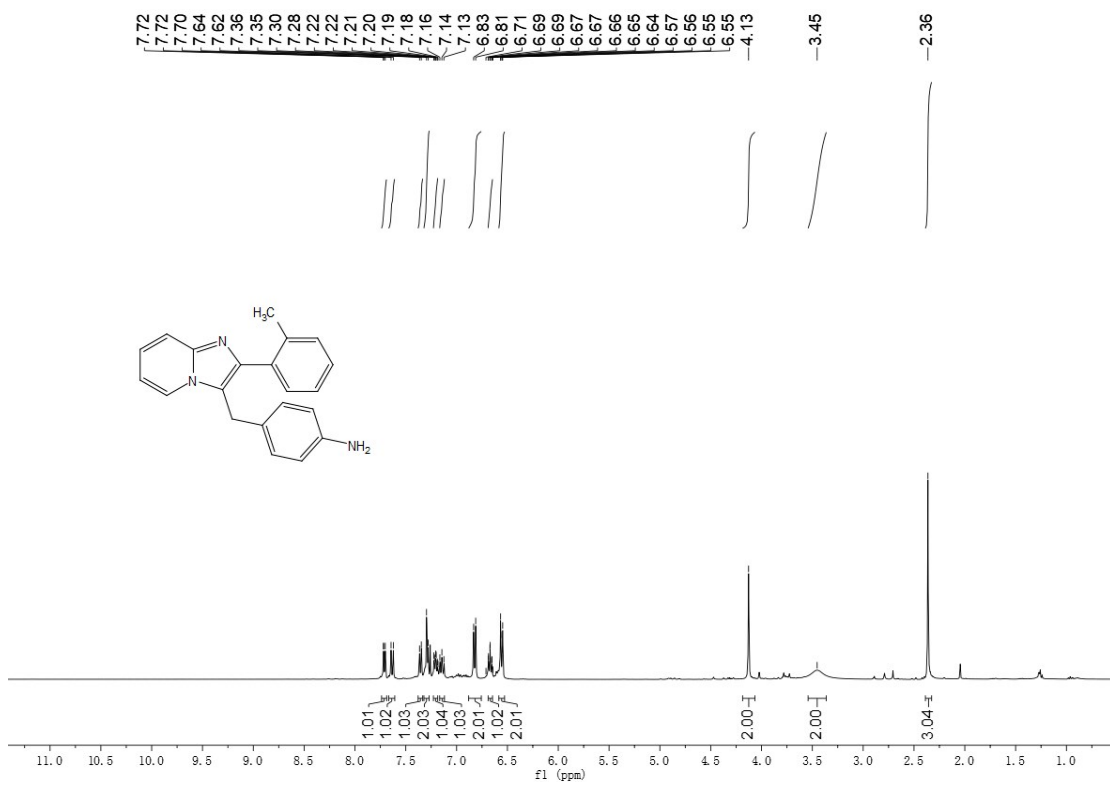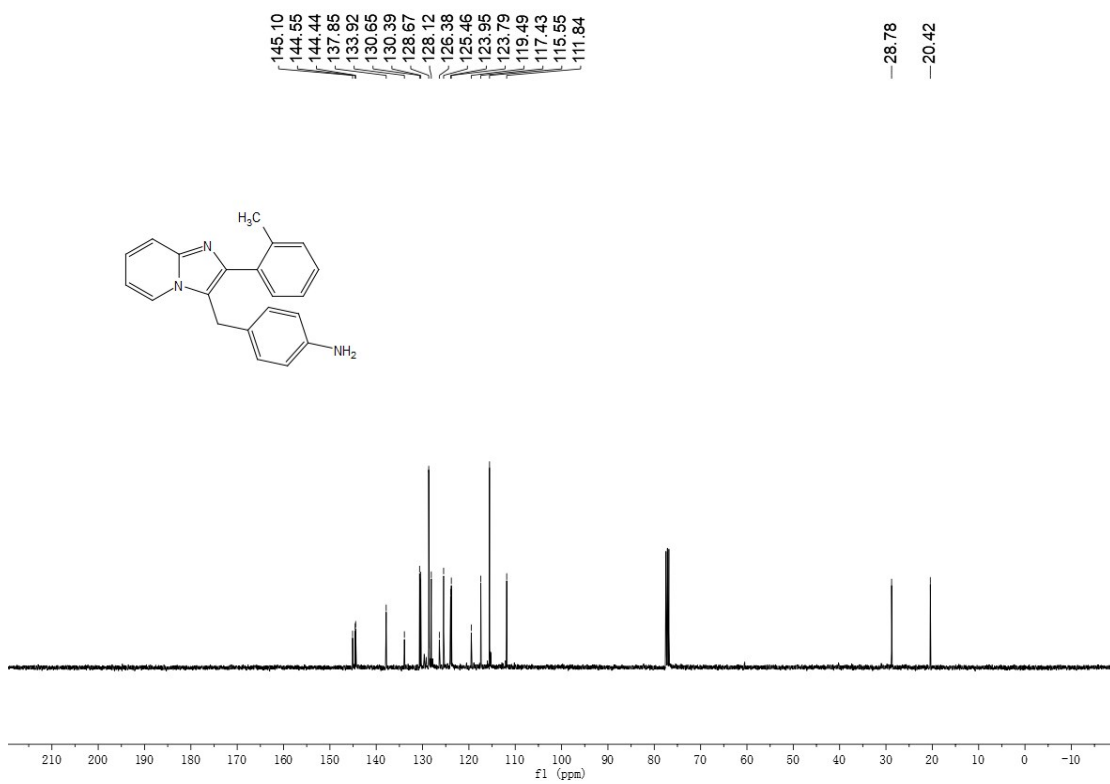



$^1\text{H}$  NMR and  $^{13}\text{C}$  NMR spectrum of compound **3j**

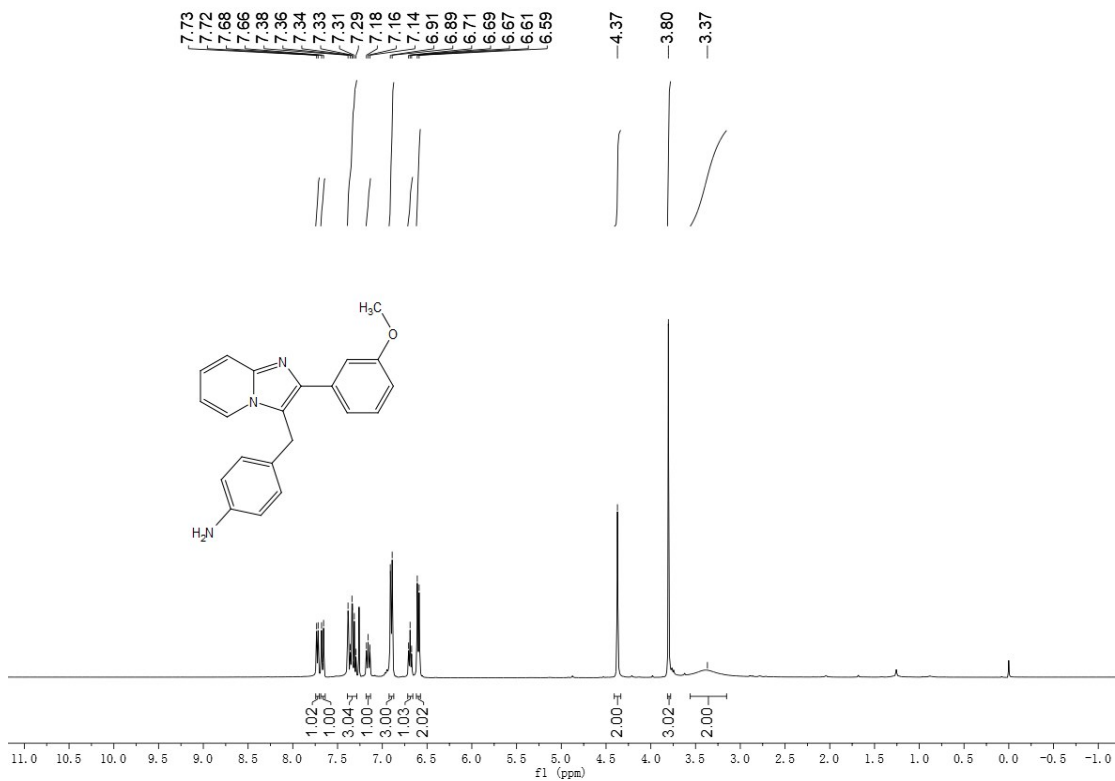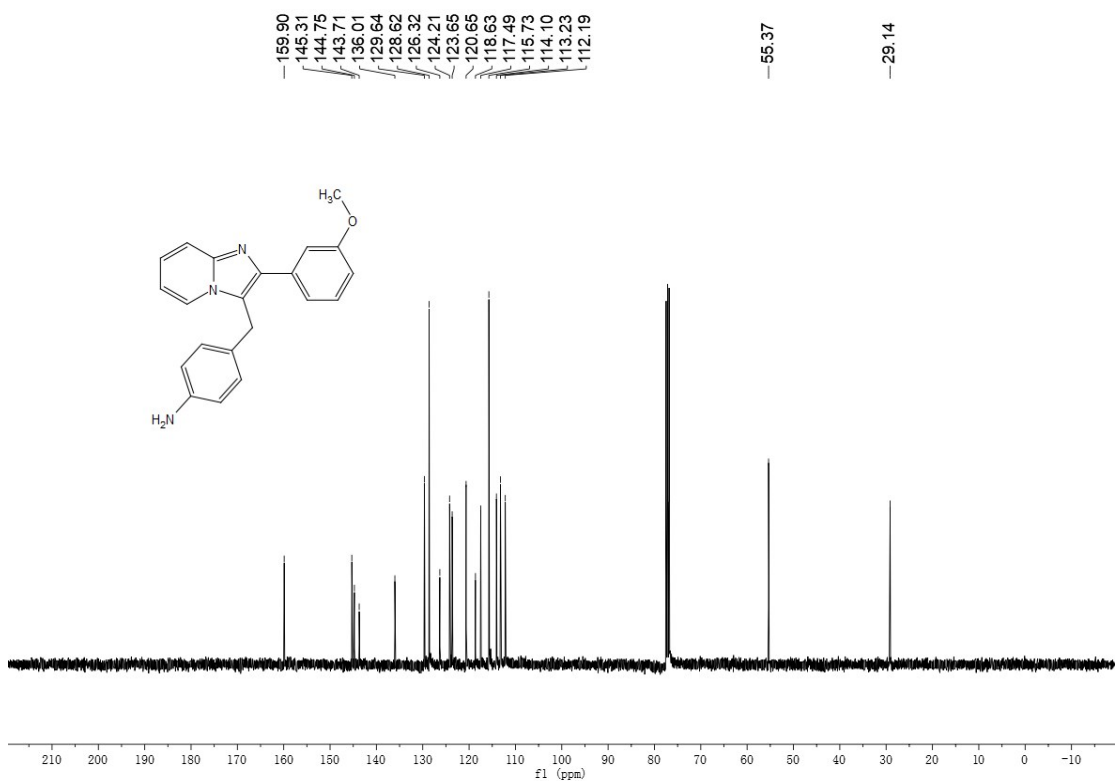

$^1\text{H}$  NMR and  $^{13}\text{C}$  NMR spectrum of compound **3k**

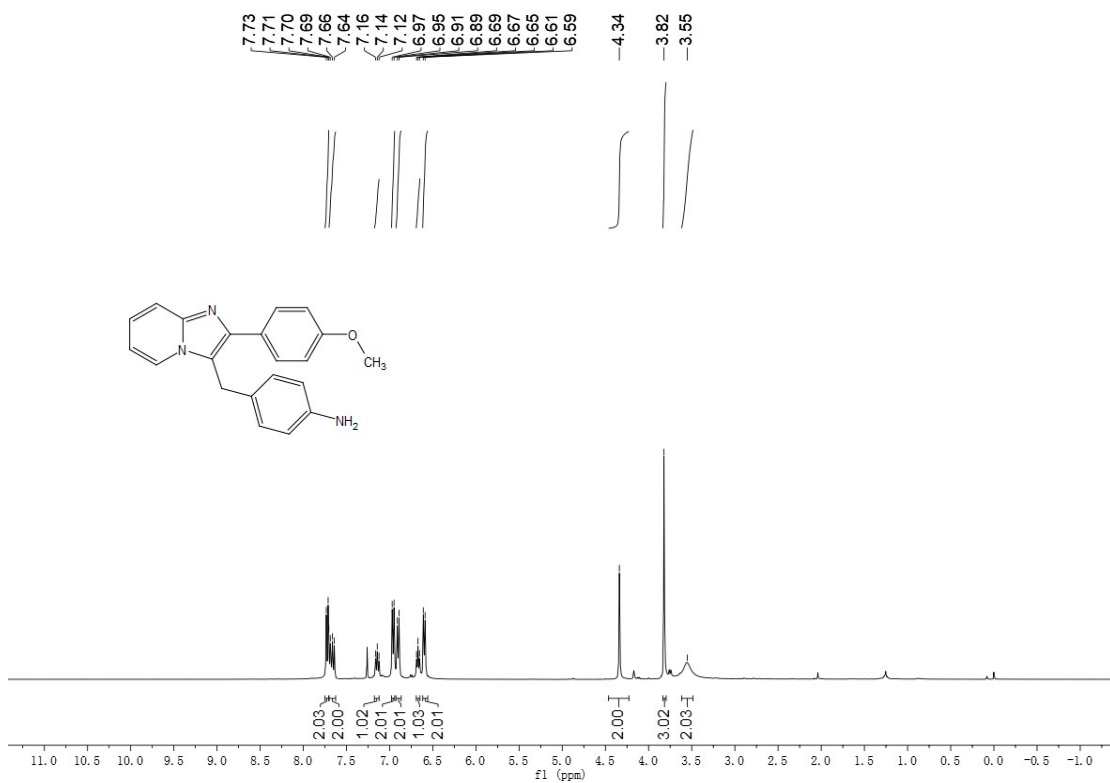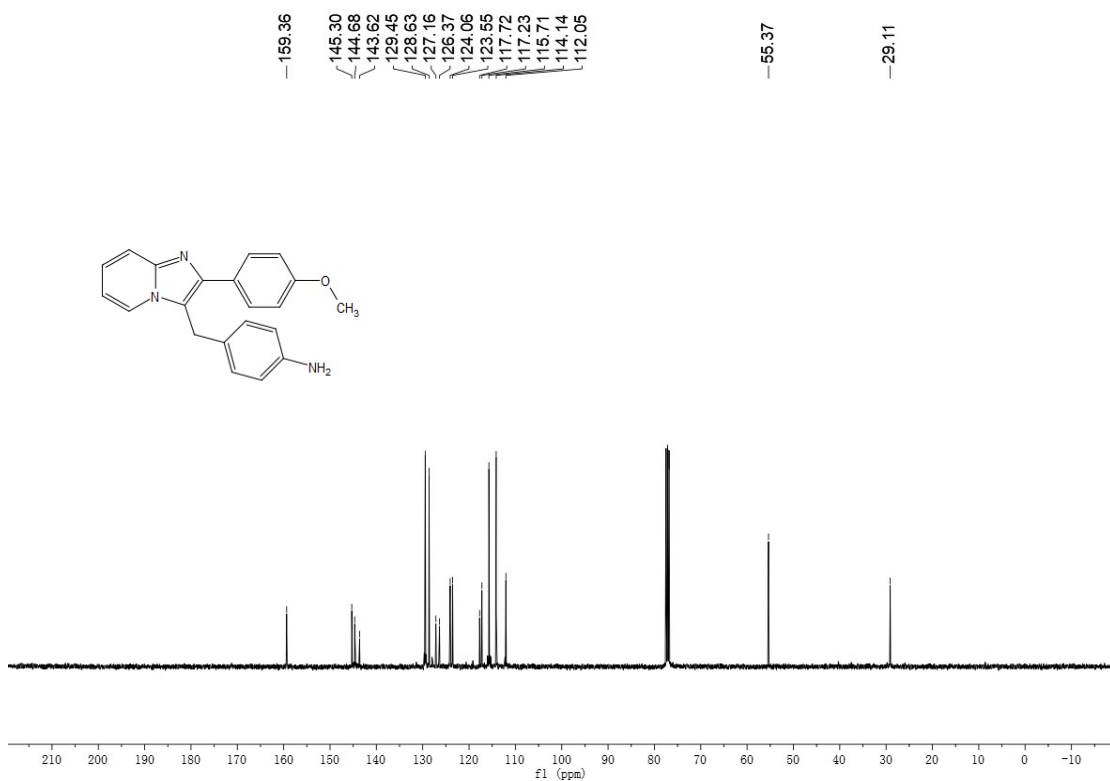

# $^1\text{H}$ NMR and $^{13}\text{C}$ NMR spectrum of compound **31**

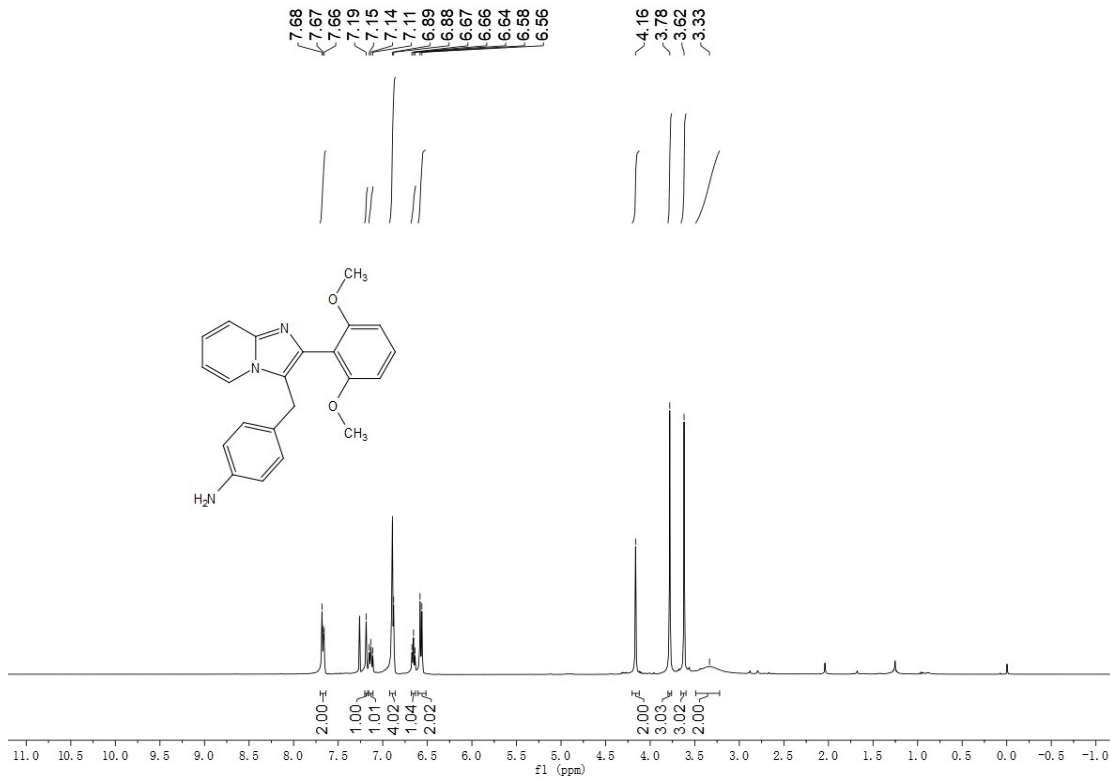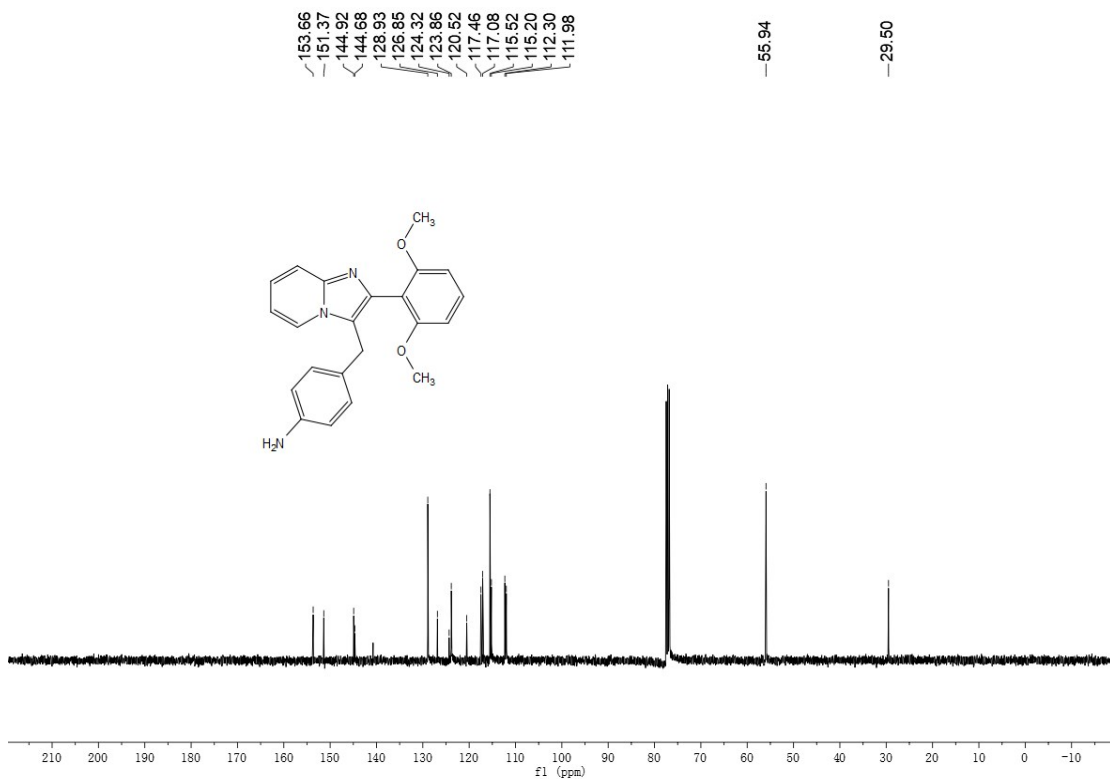

$^1\text{H}$  NMR and  $^{13}\text{C}$  NMR spectrum of compound **3m**

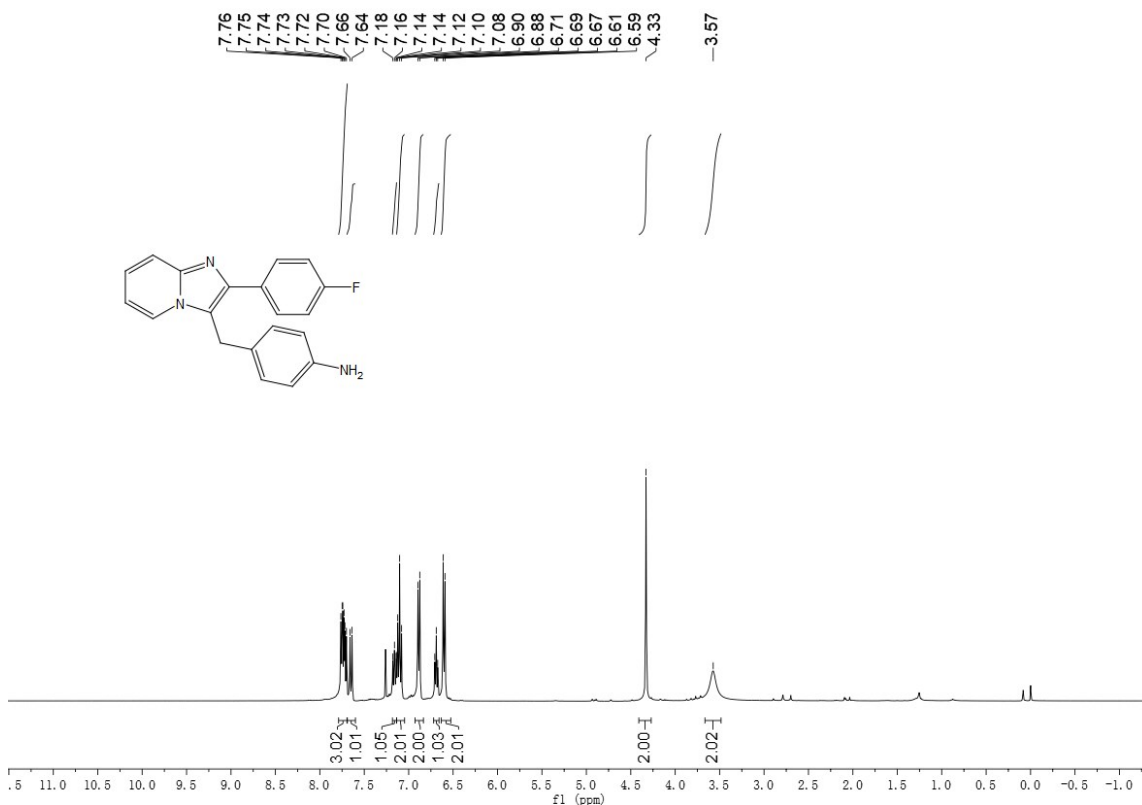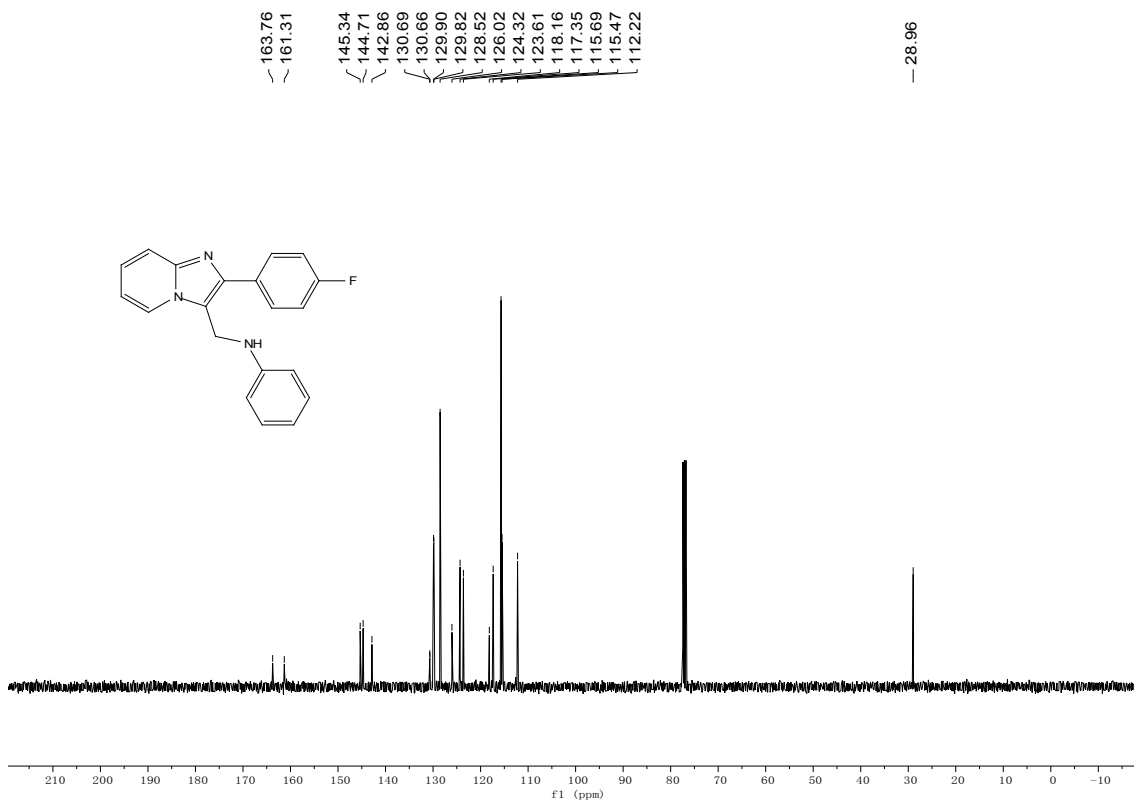





$^1\text{H}$  NMR and  $^{13}\text{C}$  NMR spectrum of compound **30**

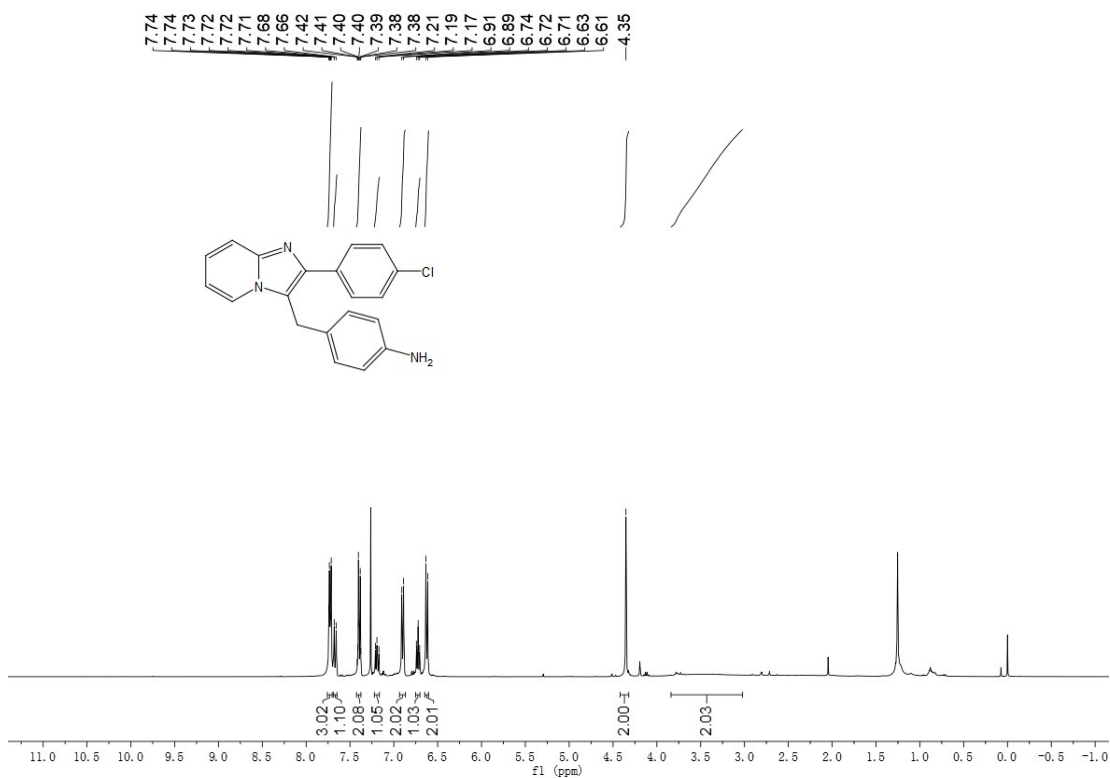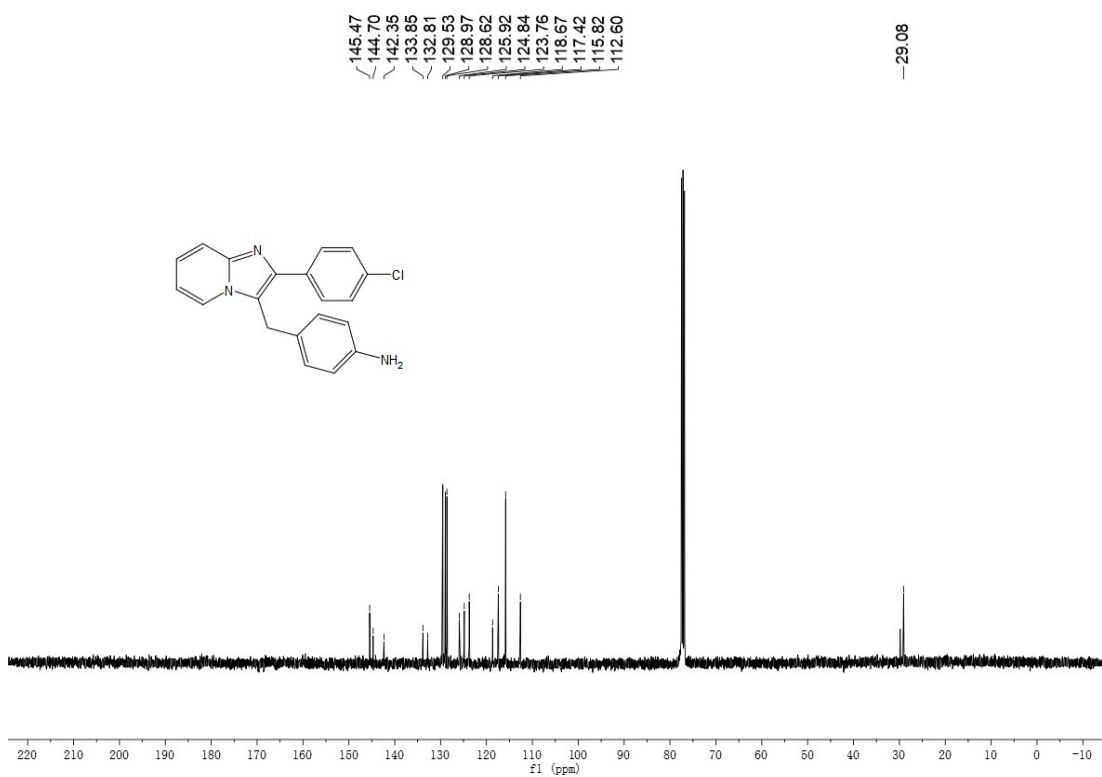

$^1\text{H}$  NMR and  $^{13}\text{C}$  NMR spectrum of compound **3p**

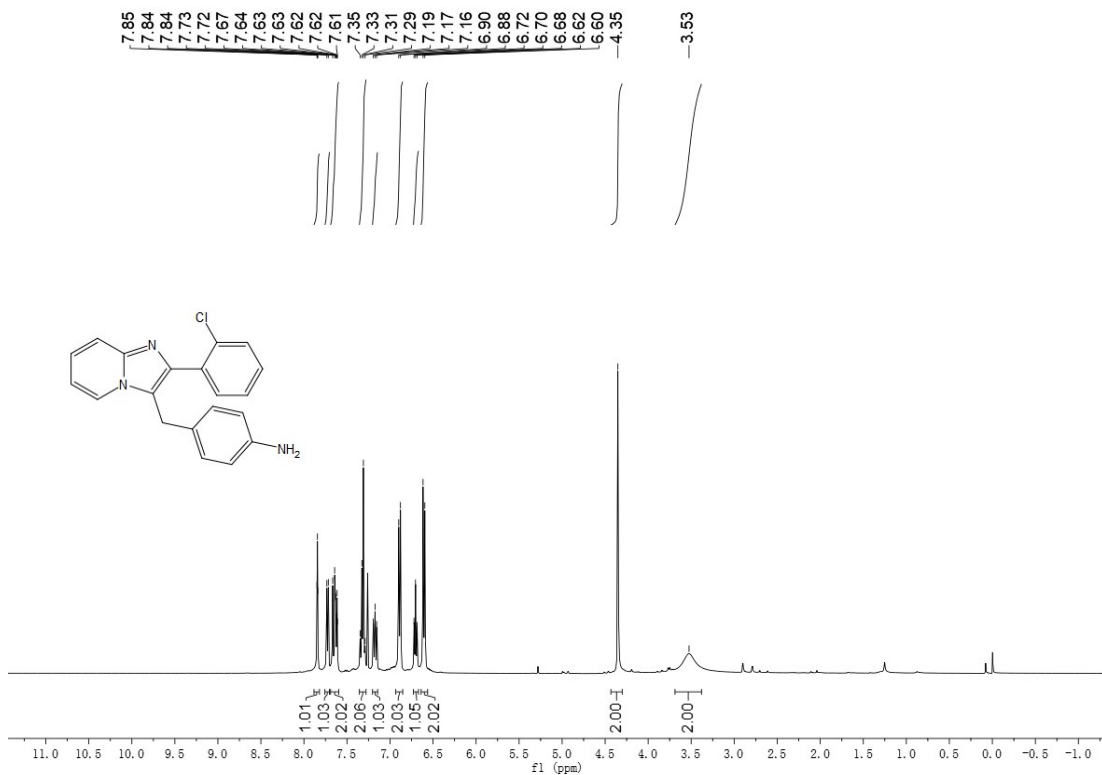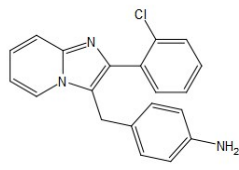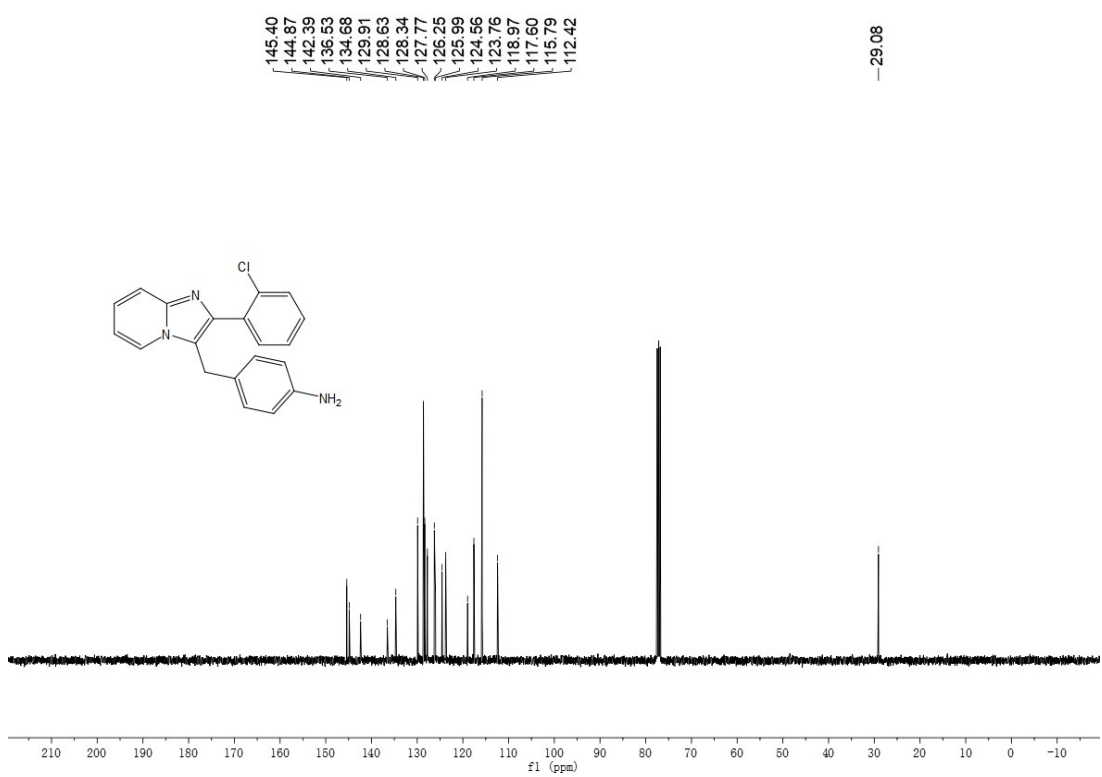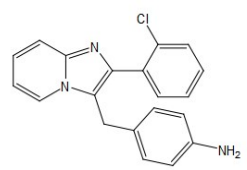

$^1\text{H}$  NMR and  $^{13}\text{C}$  NMR spectrum of compound **3q**

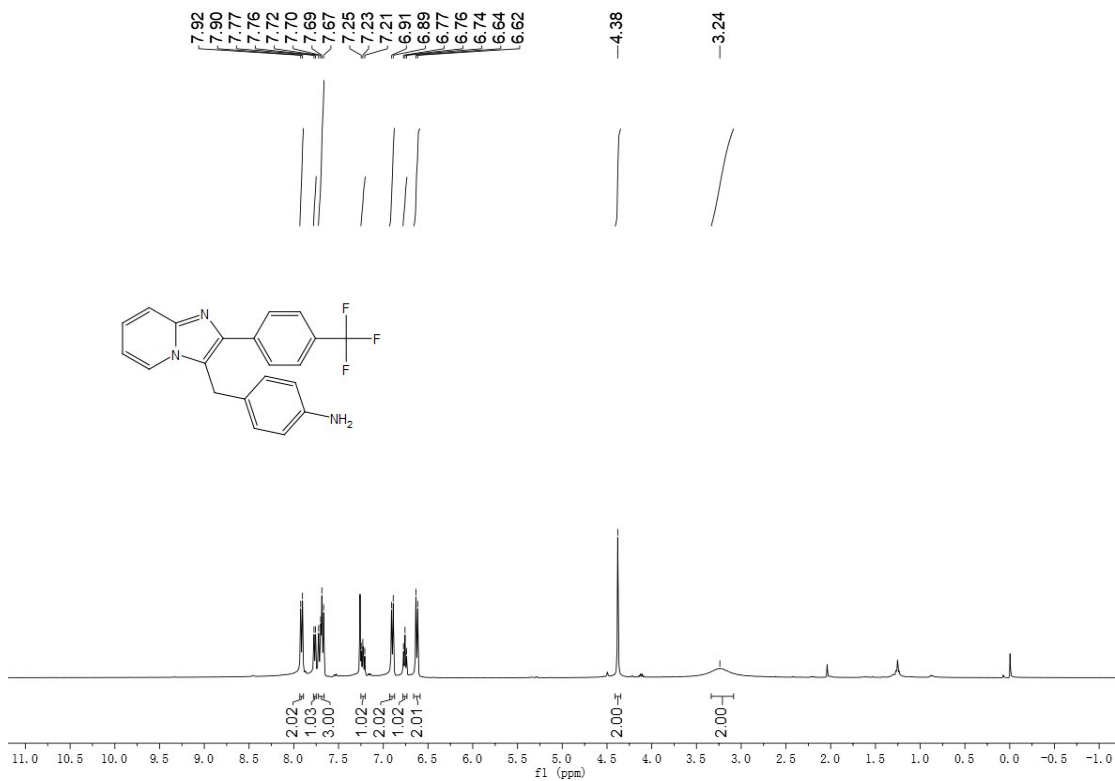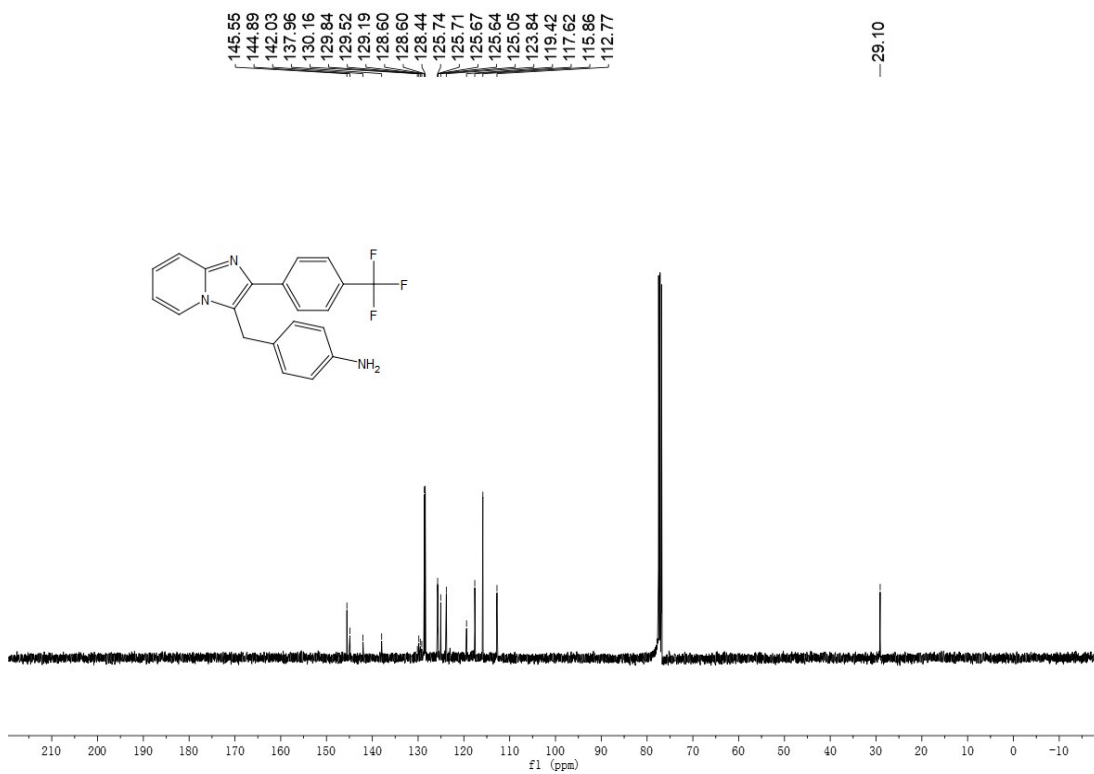

$^1\text{H}$  NMR and  $^{13}\text{C}$  NMR spectrum of compound **3r**

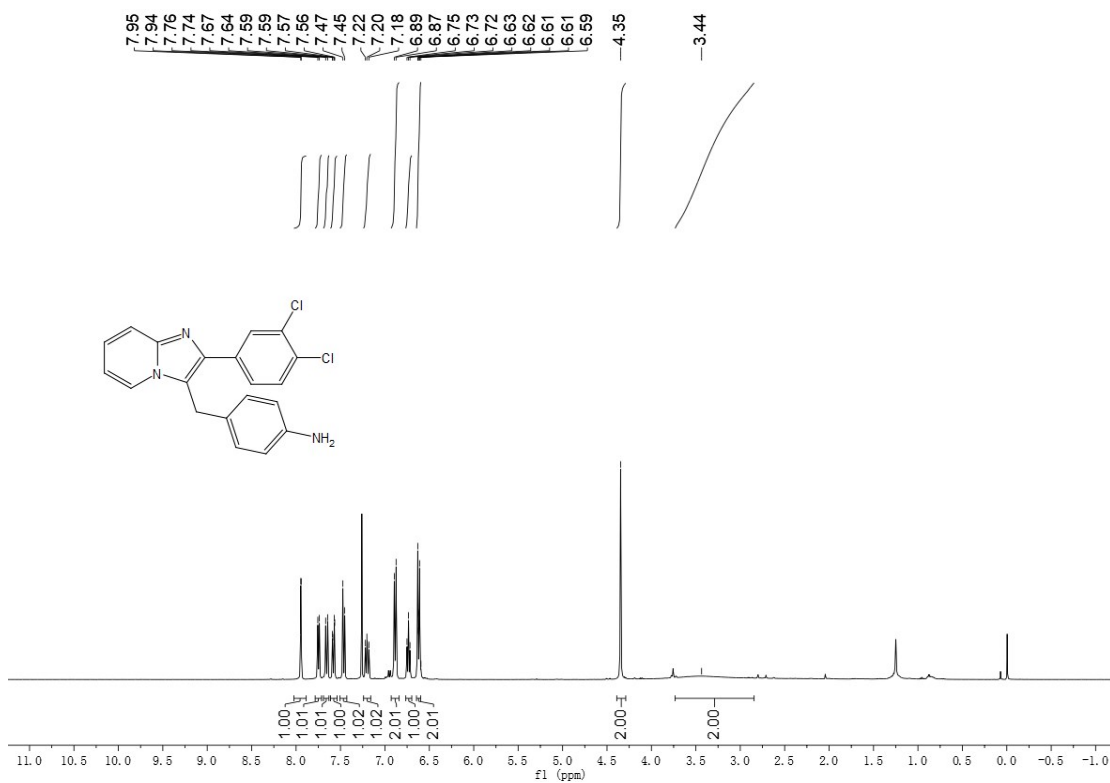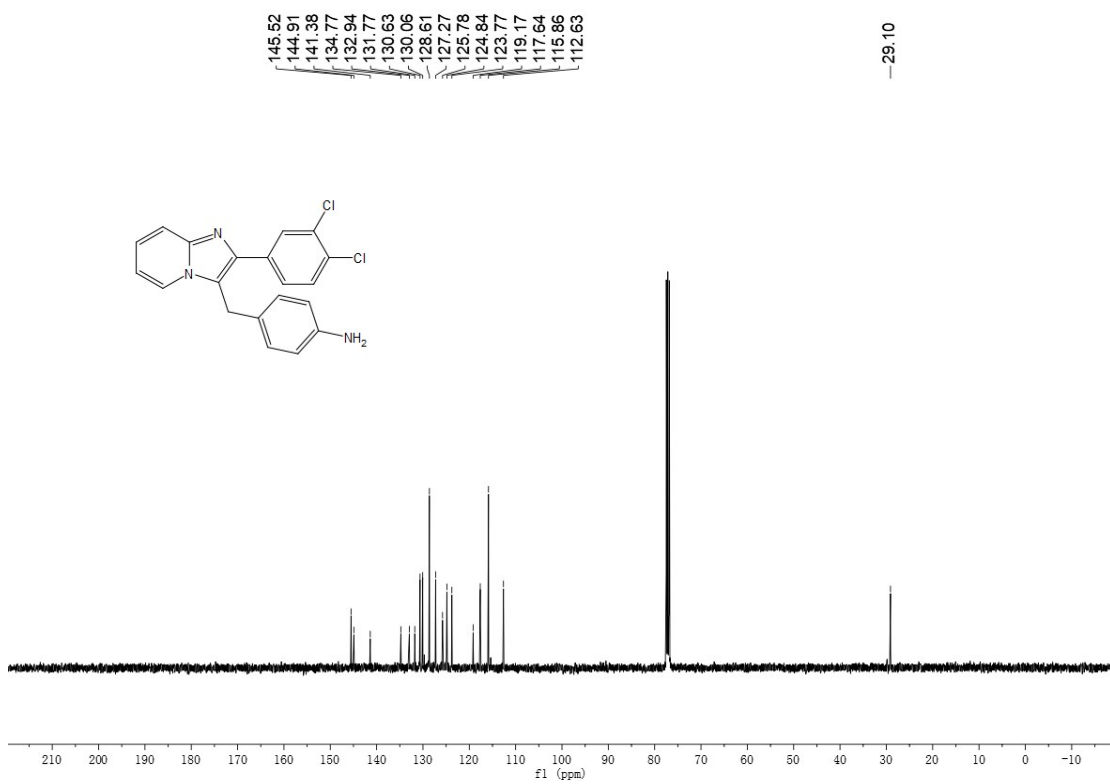

$^1\text{H}$  NMR and  $^{13}\text{C}$  NMR spectrum of compound **3s**

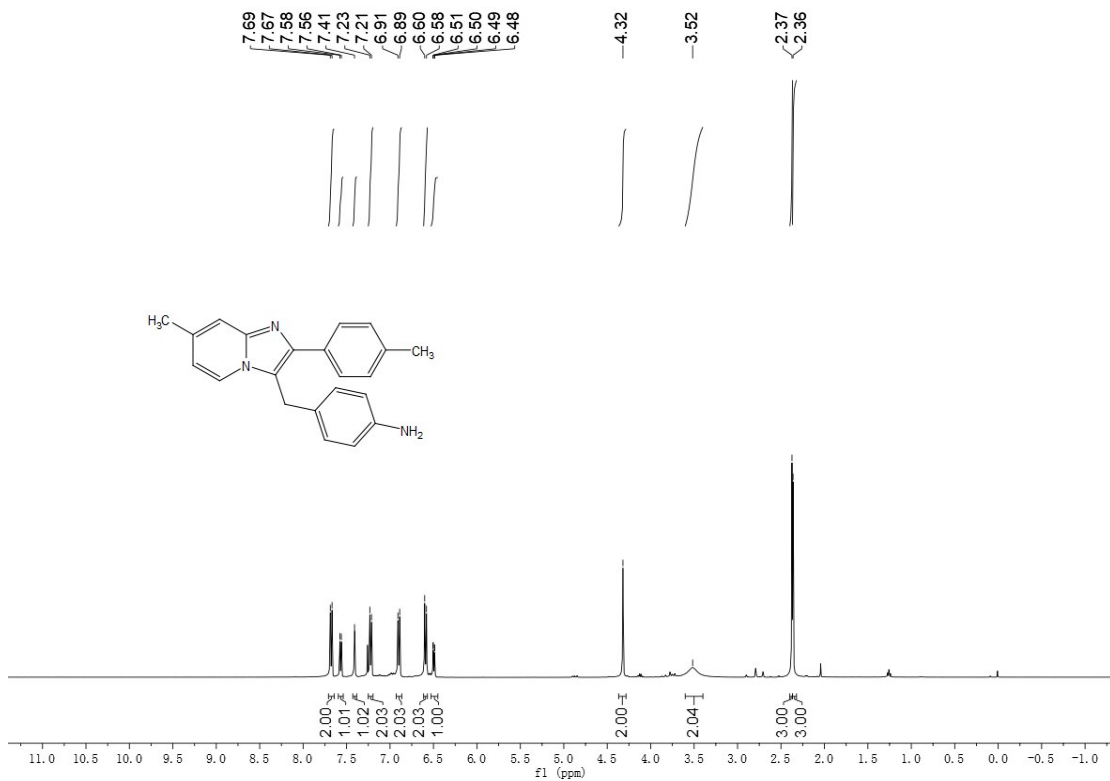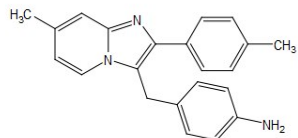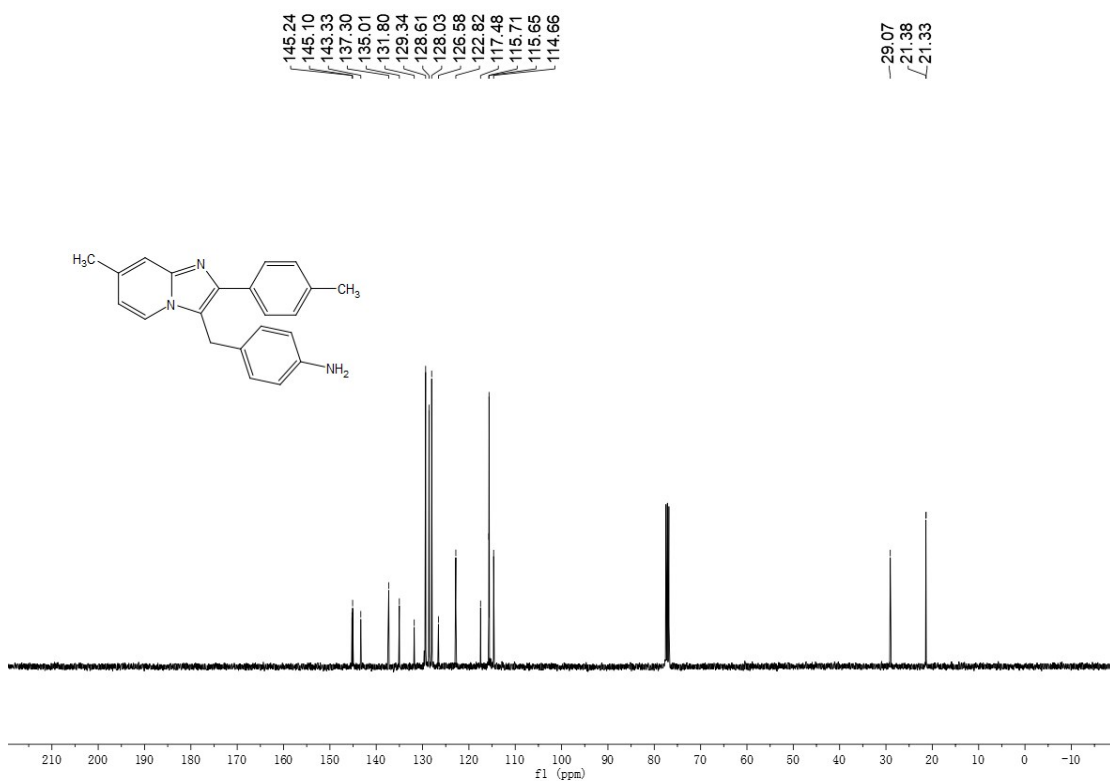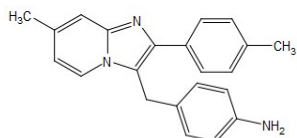

$^1\text{H}$  NMR and  $^{13}\text{C}$  NMR spectrum of compound **3t**

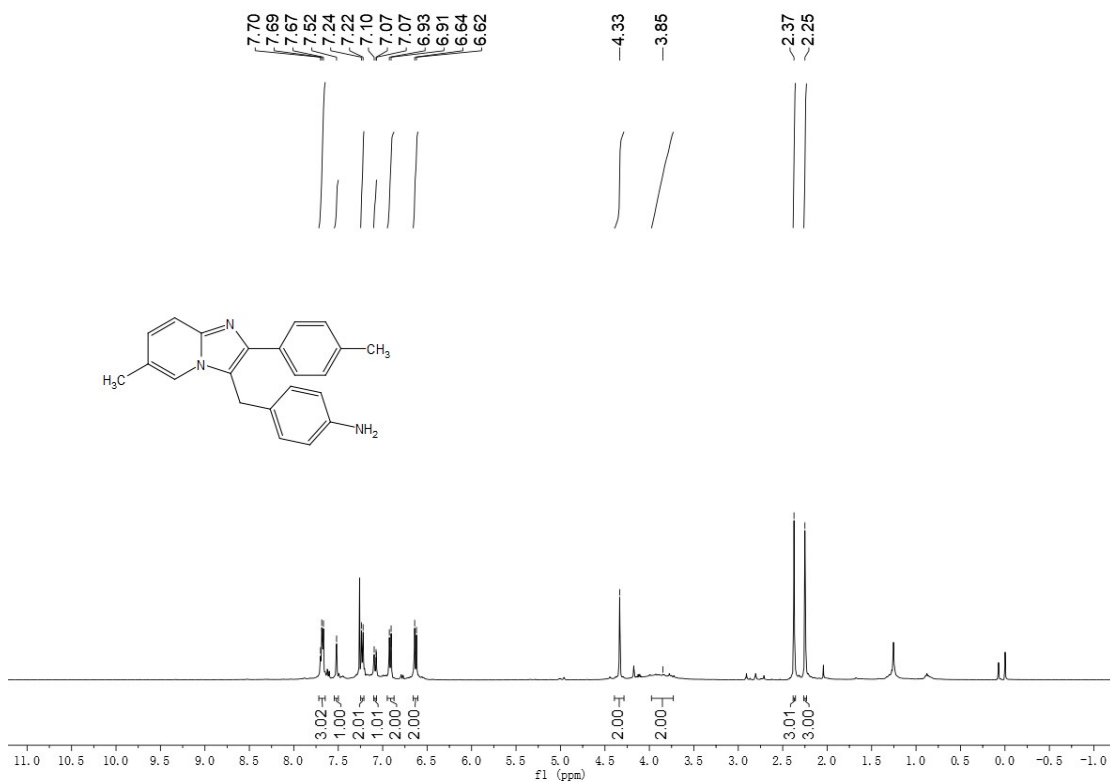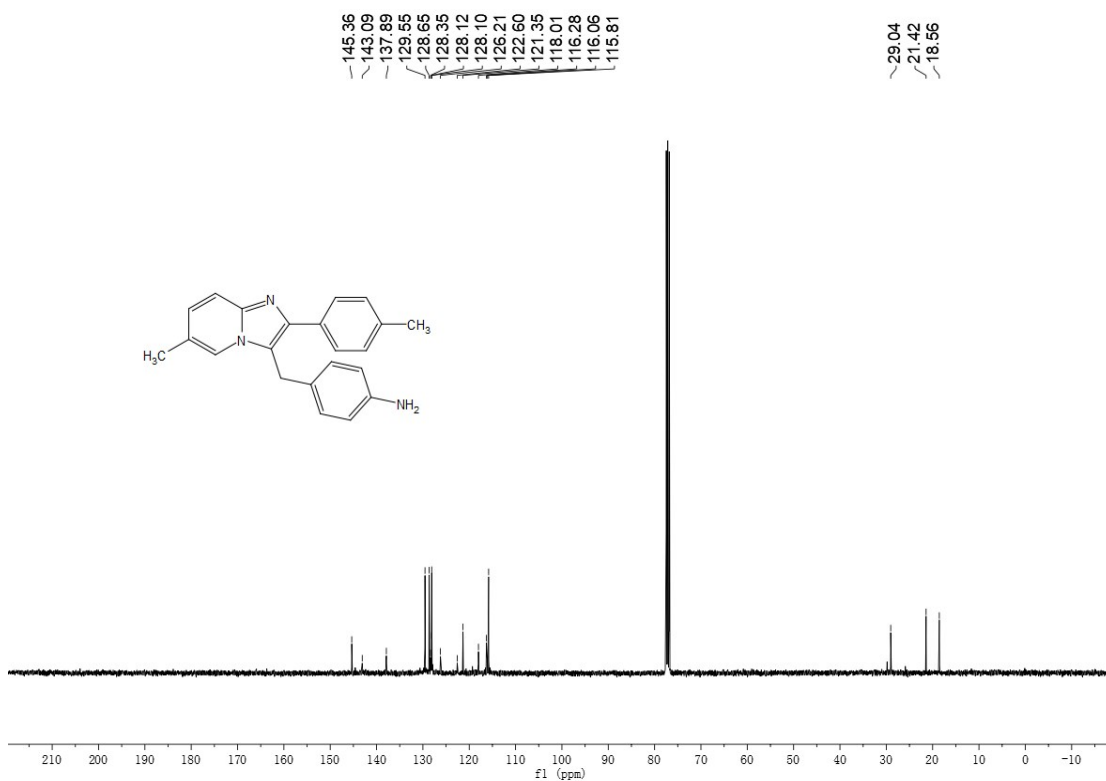

$^1\text{H}$  NMR and  $^{13}\text{C}$  NMR spectrum of compound **3u**

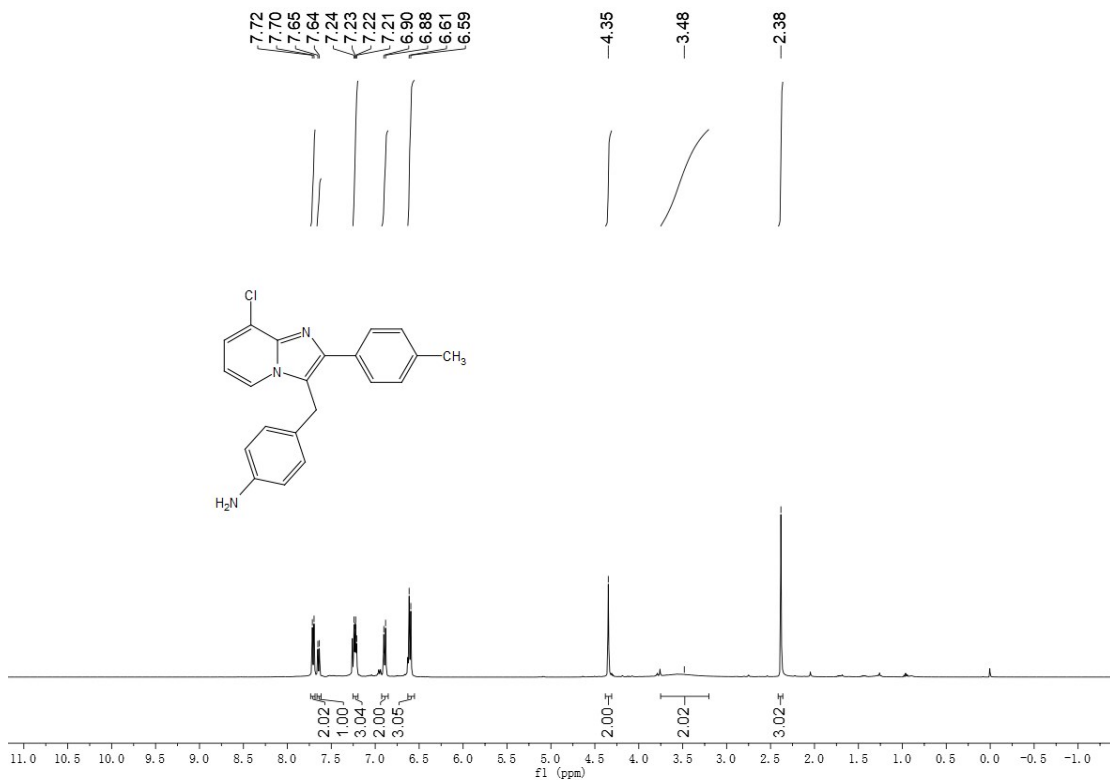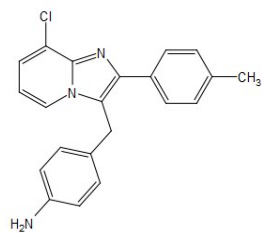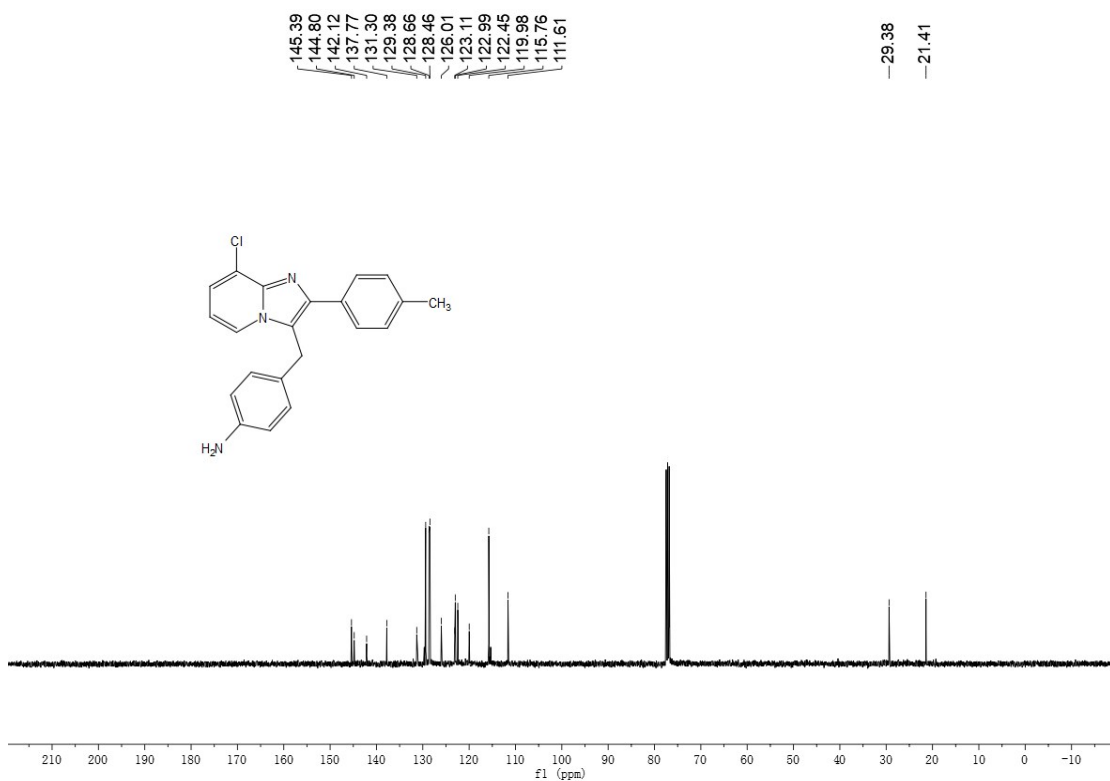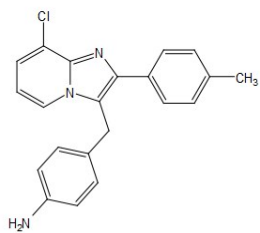



$^1\text{H}$  NMR and  $^{13}\text{C}$  NMR spectrum of compound **3v**

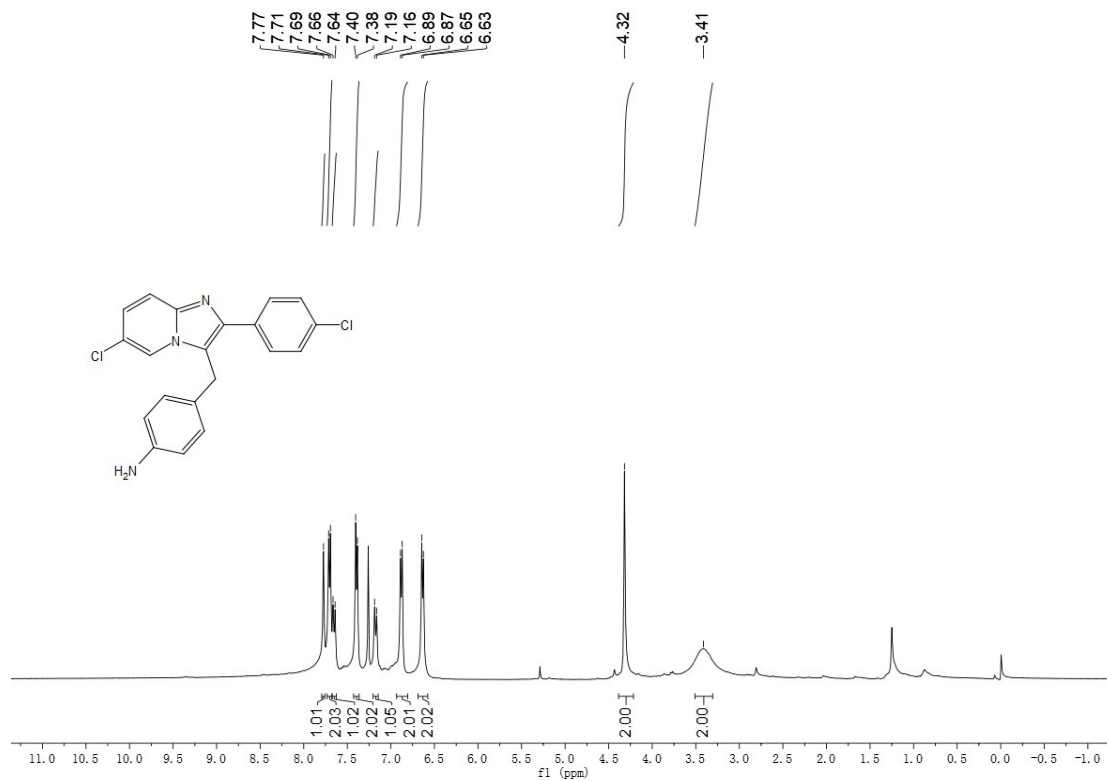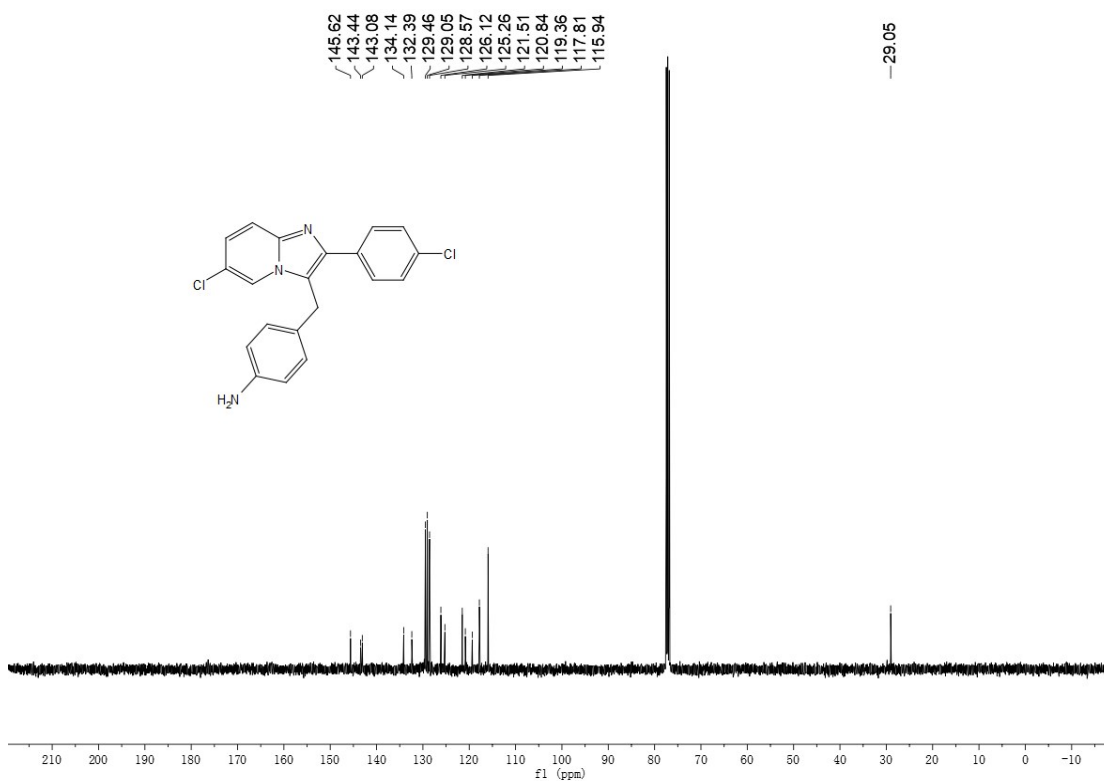

$^1\text{H}$  NMR and  $^{13}\text{C}$  NMR spectrum of compound **3w**

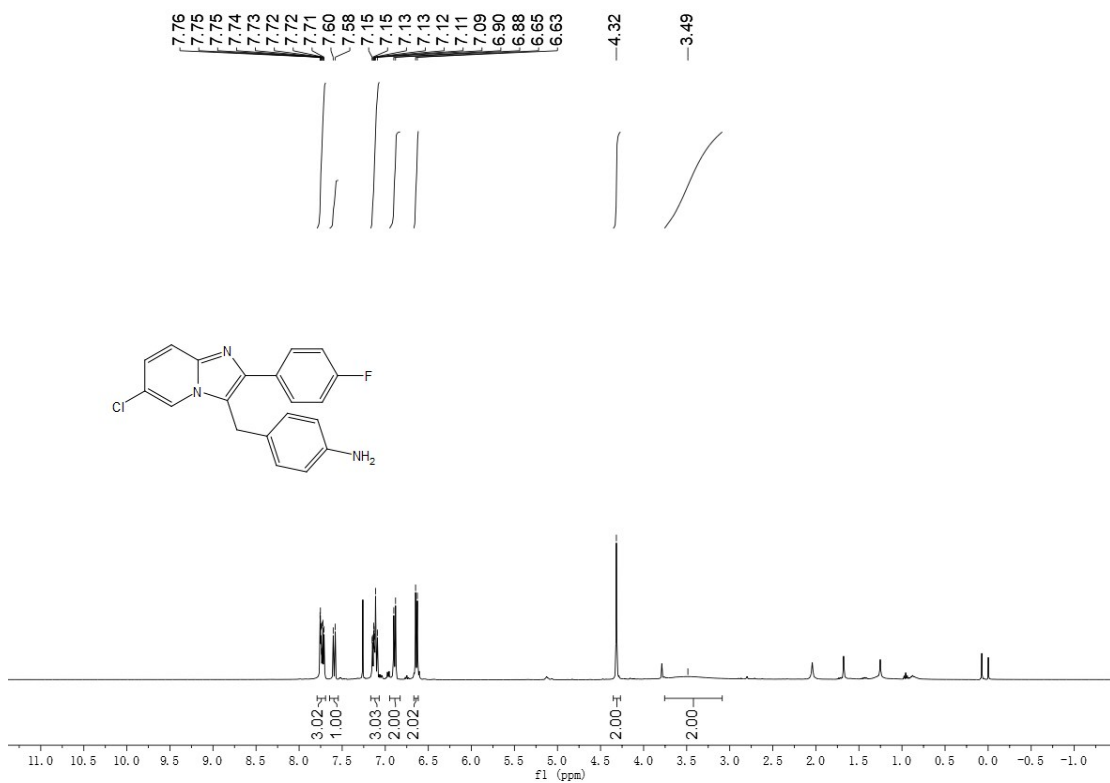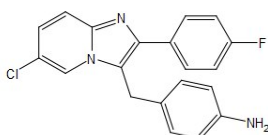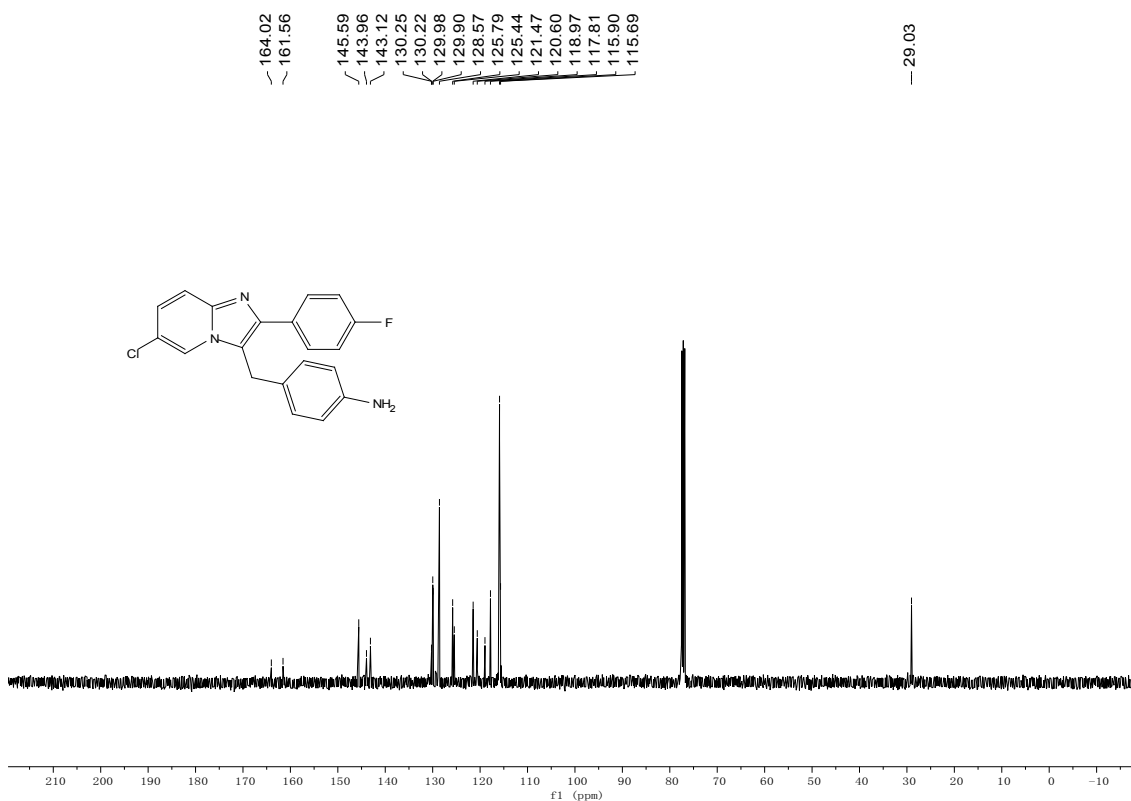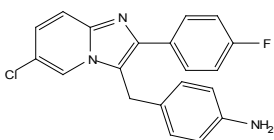

$^1\text{H}$  NMR and  $^{13}\text{C}$  NMR spectrum of compound **3x**

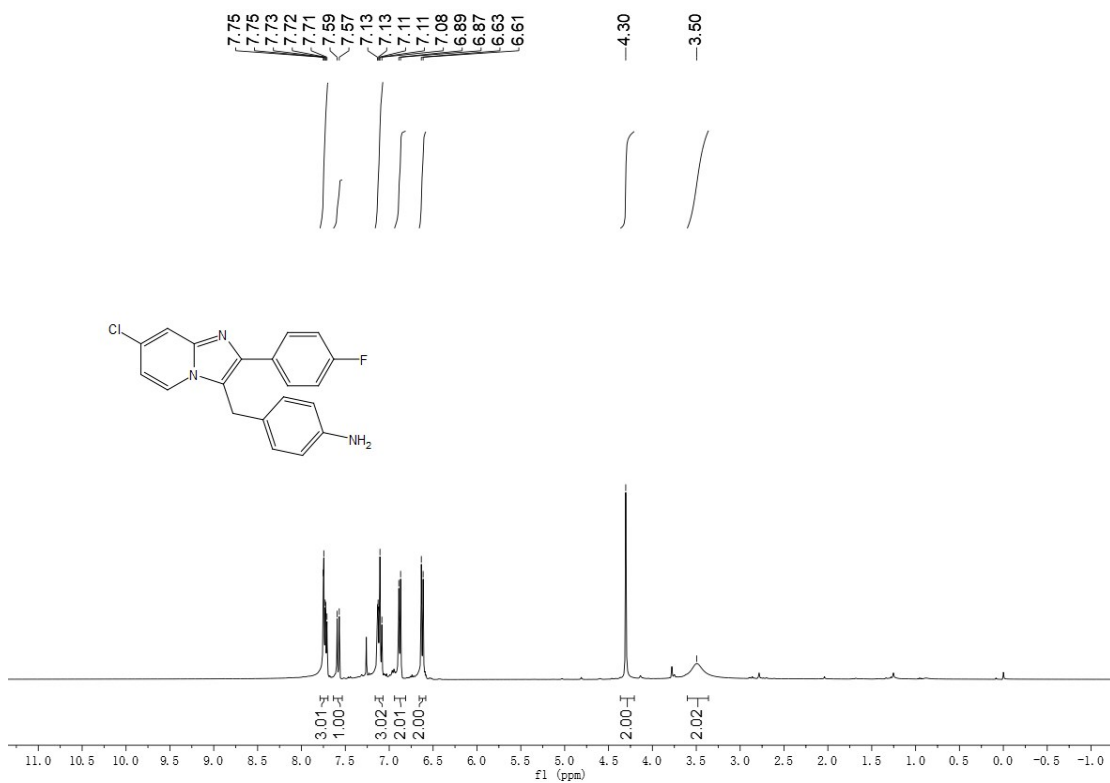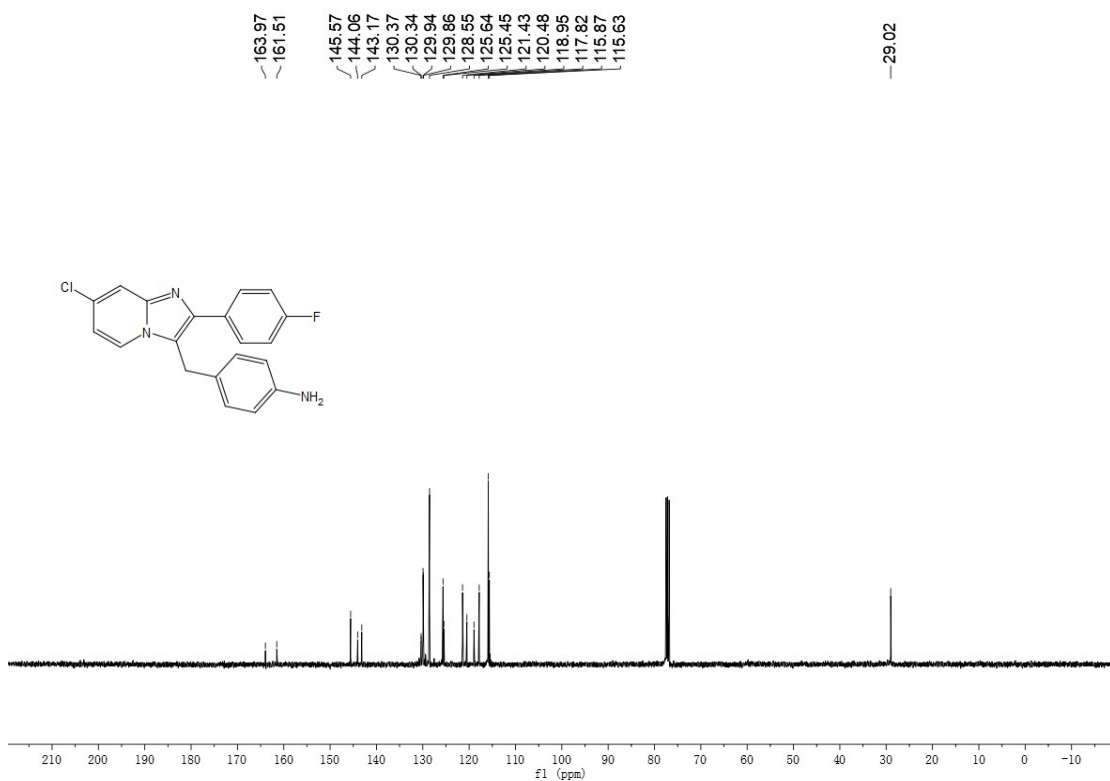

$^1\text{H}$  NMR and  $^{13}\text{C}$  NMR spectrum of compound **3y**

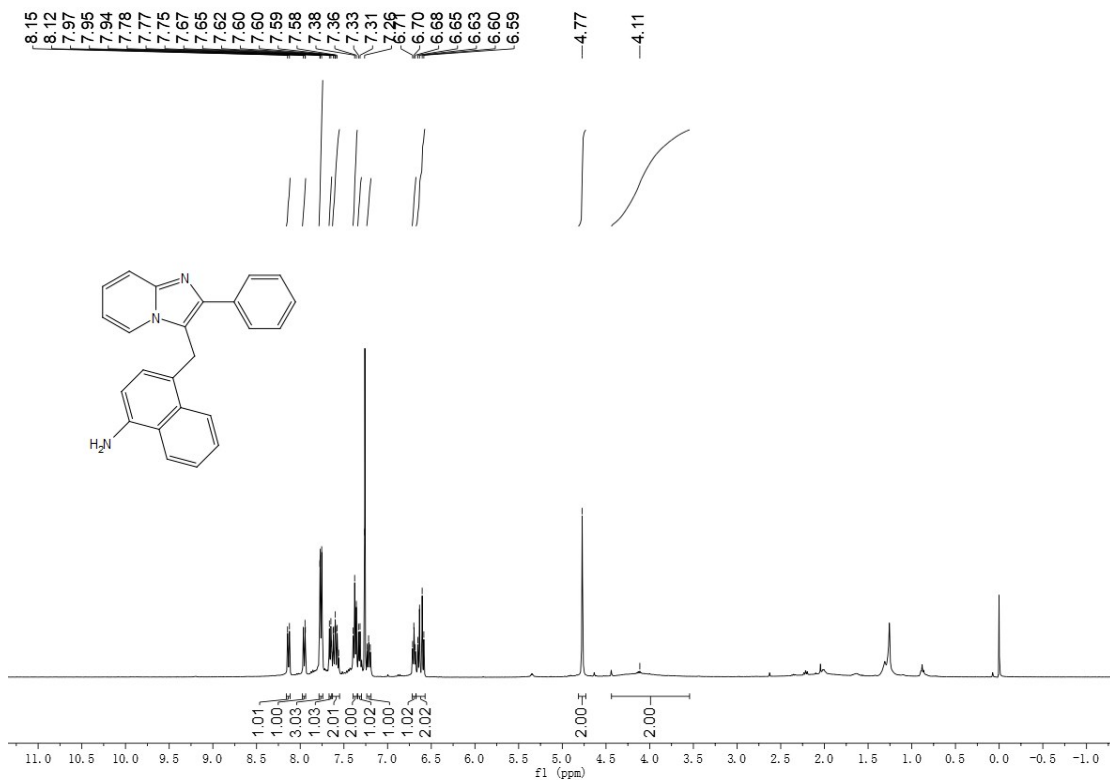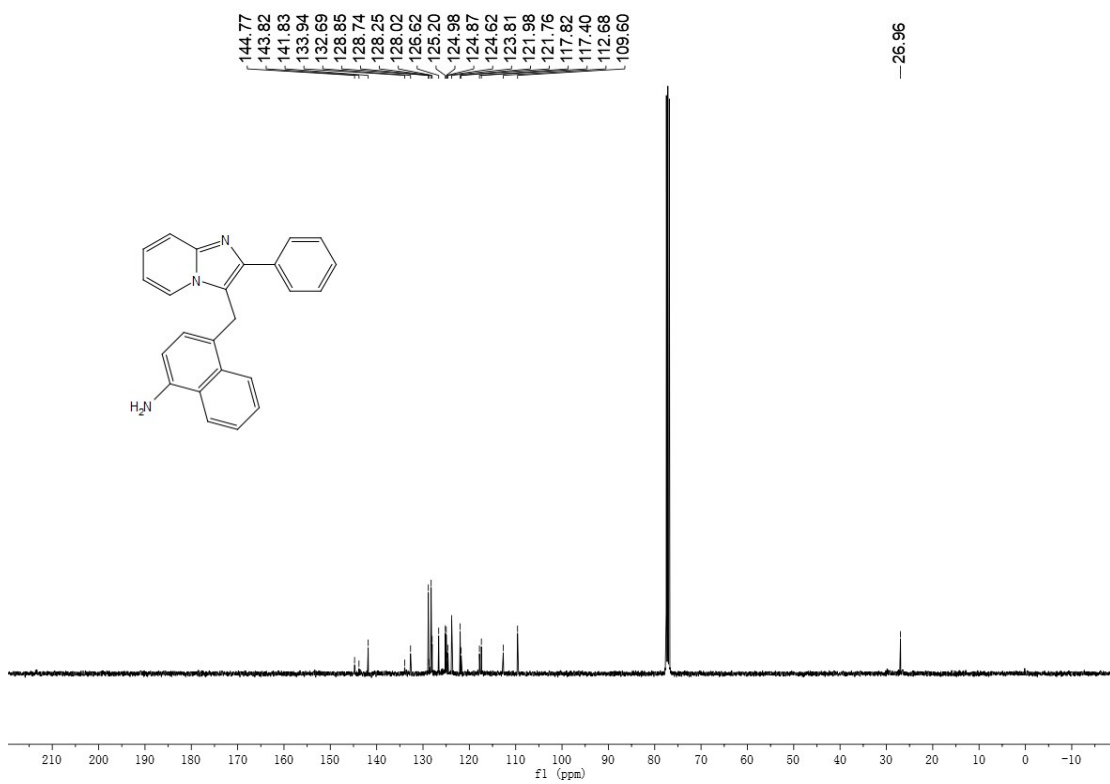

$^1\text{H}$  NMR and  $^{13}\text{C}$  NMR spectrum of compound **3z**

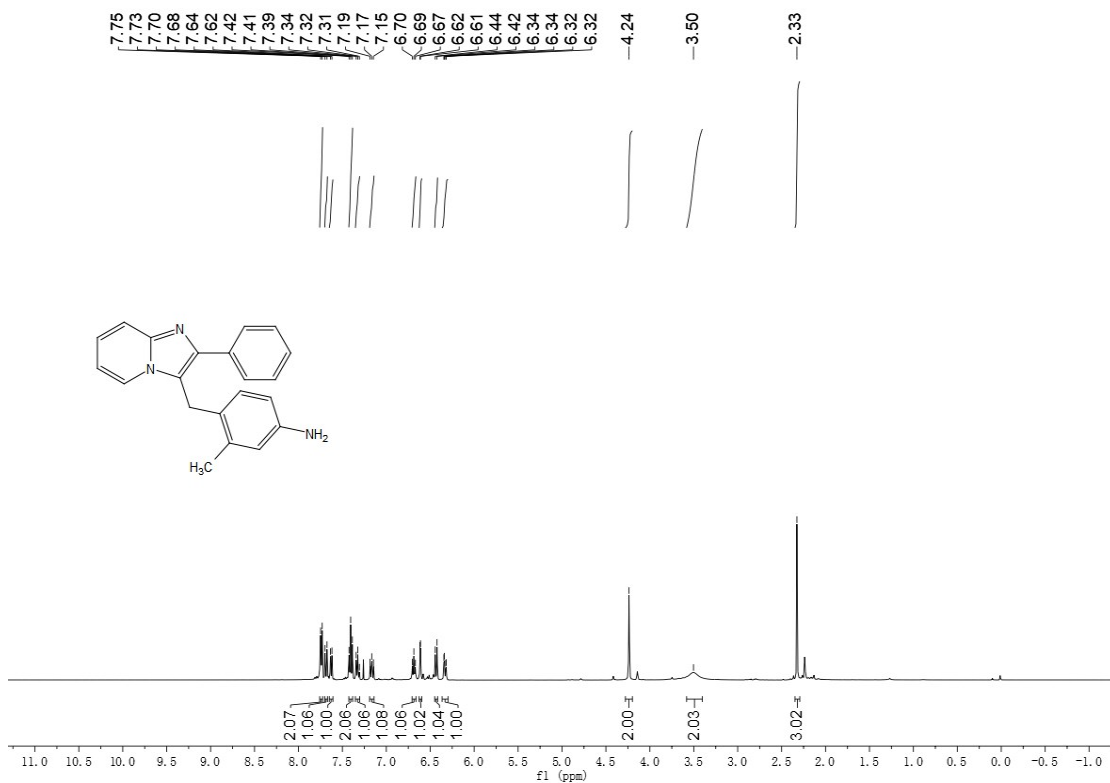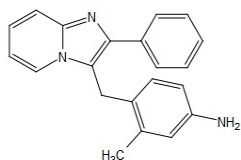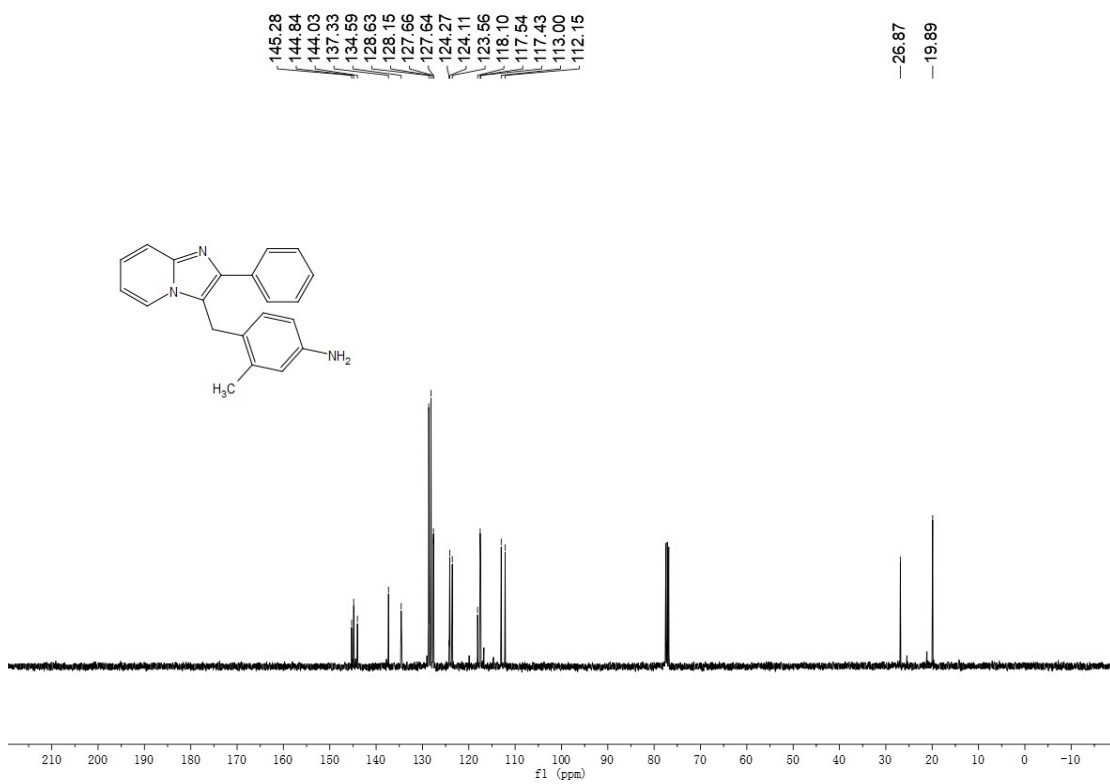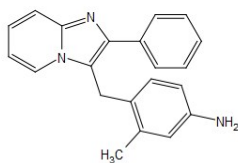

$^1\text{H}$  NMR and  $^{13}\text{C}$  NMR spectrum of compound **3aa**

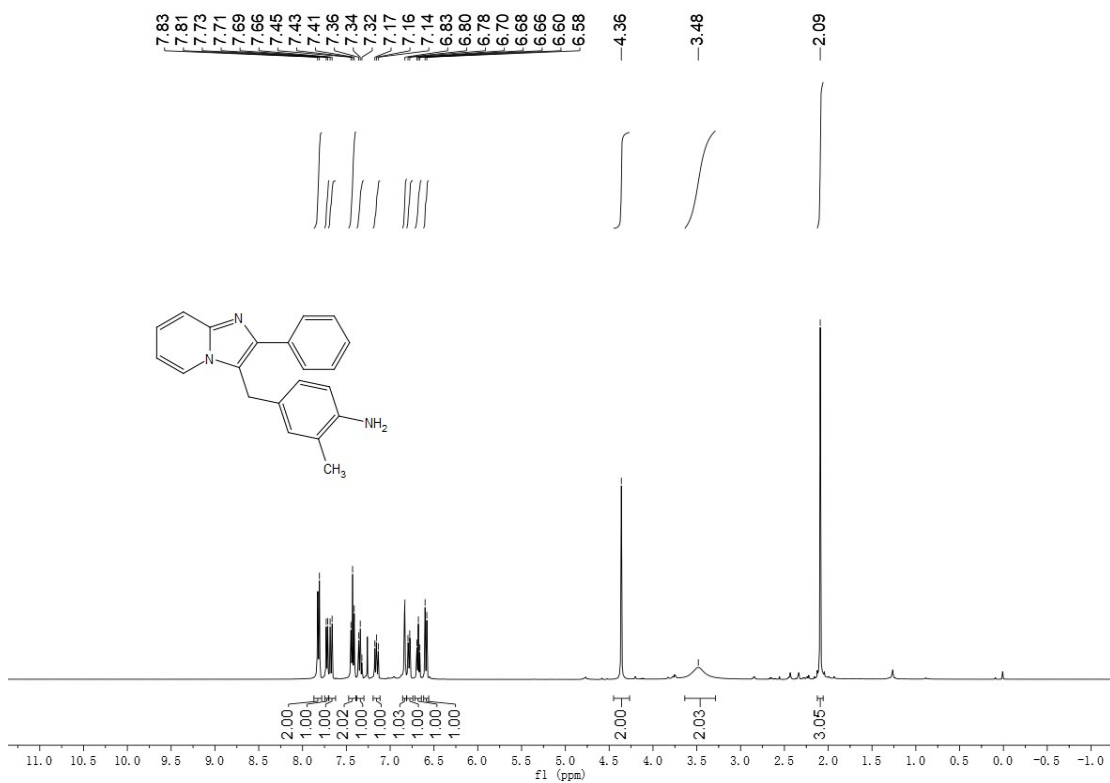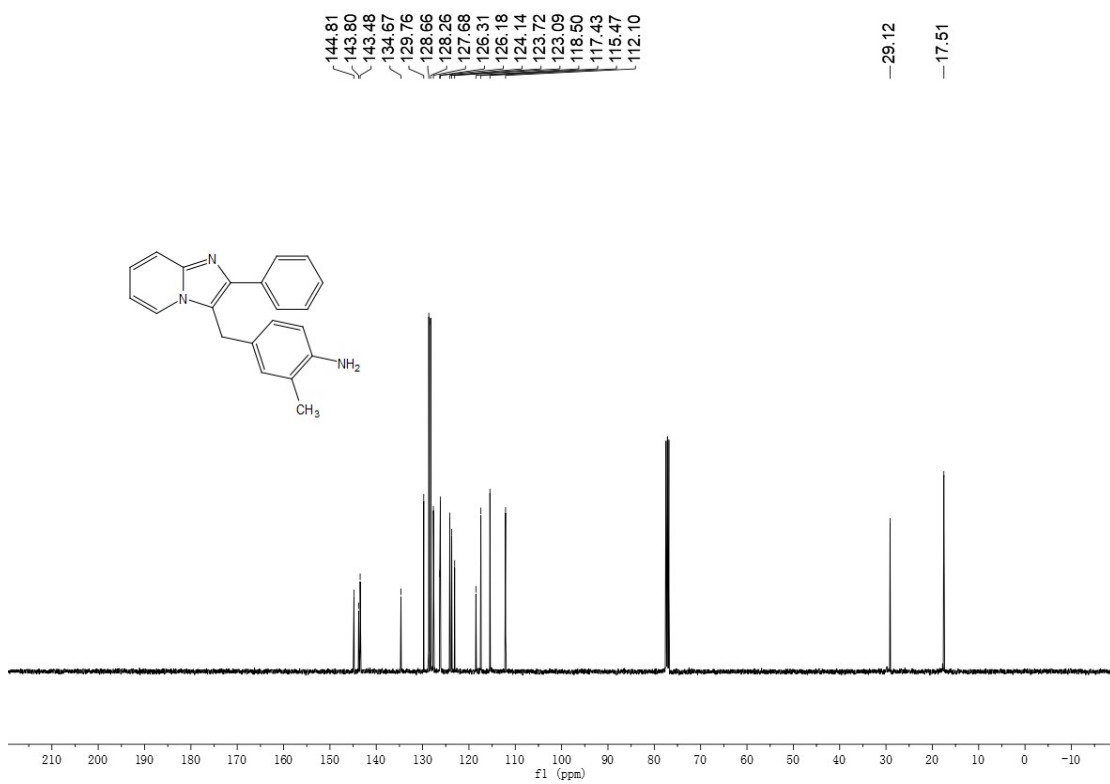

$^1\text{H}$  NMR and  $^{13}\text{C}$  NMR spectrum of compound **3ab**

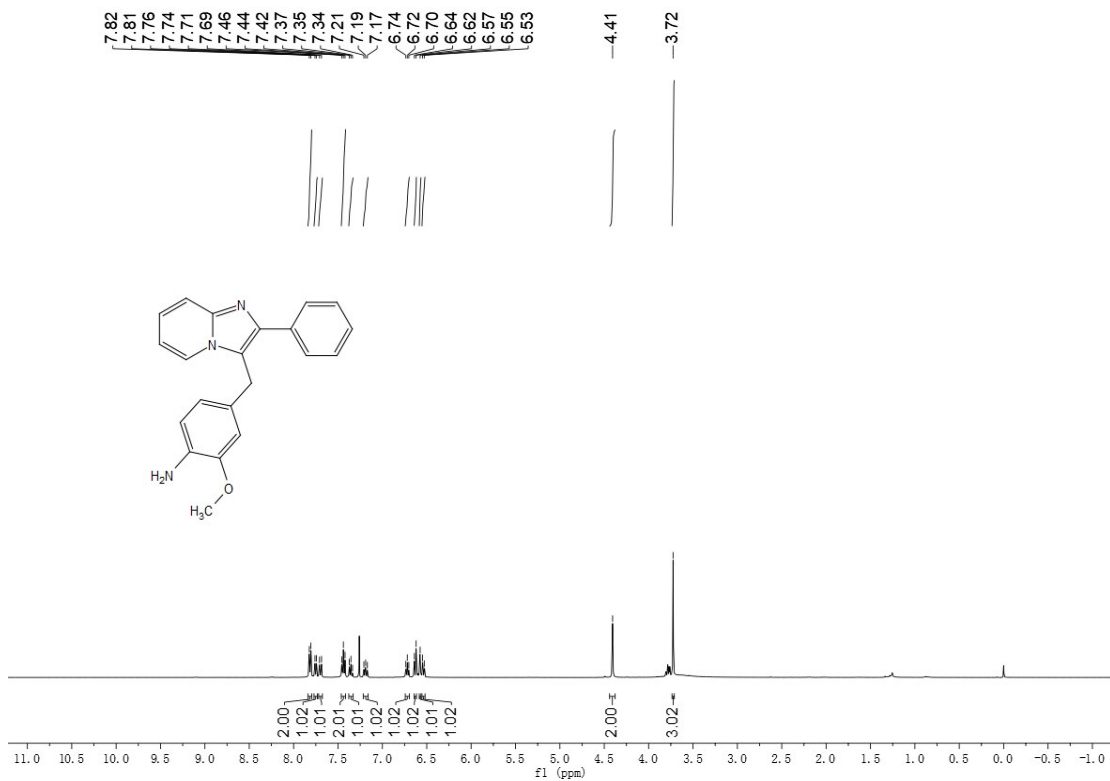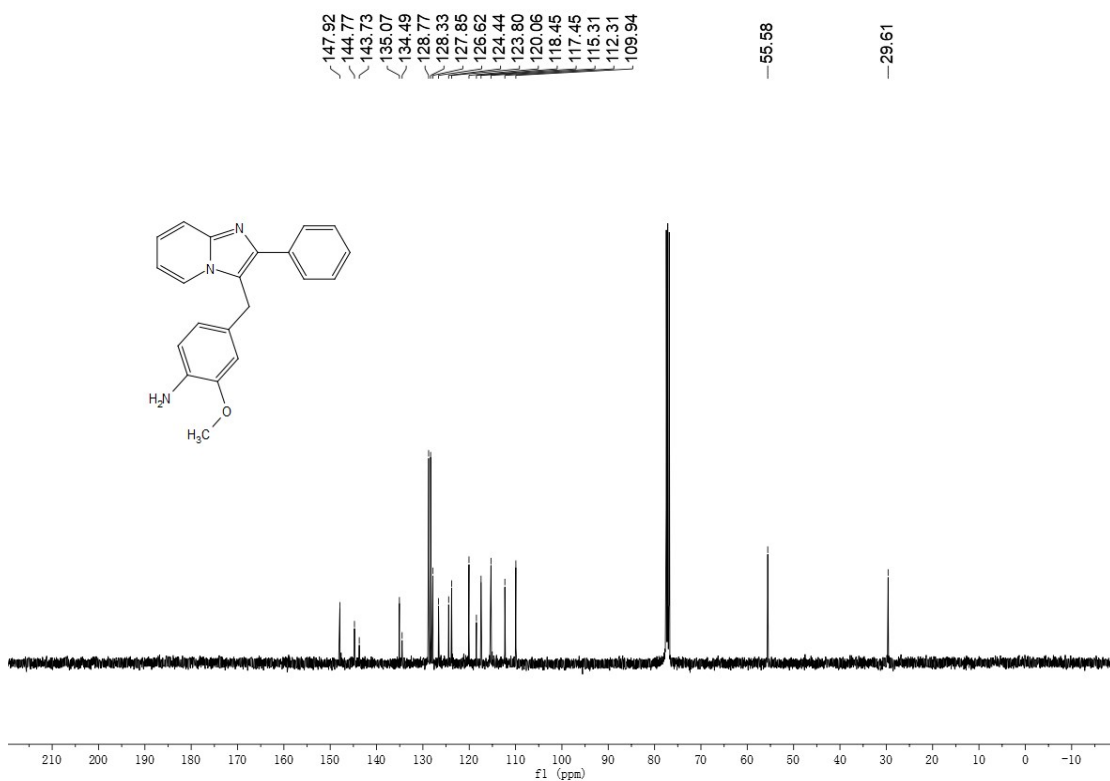

$^1\text{H}$  NMR and  $^{13}\text{C}$  NMR spectrum of compound **3ac**

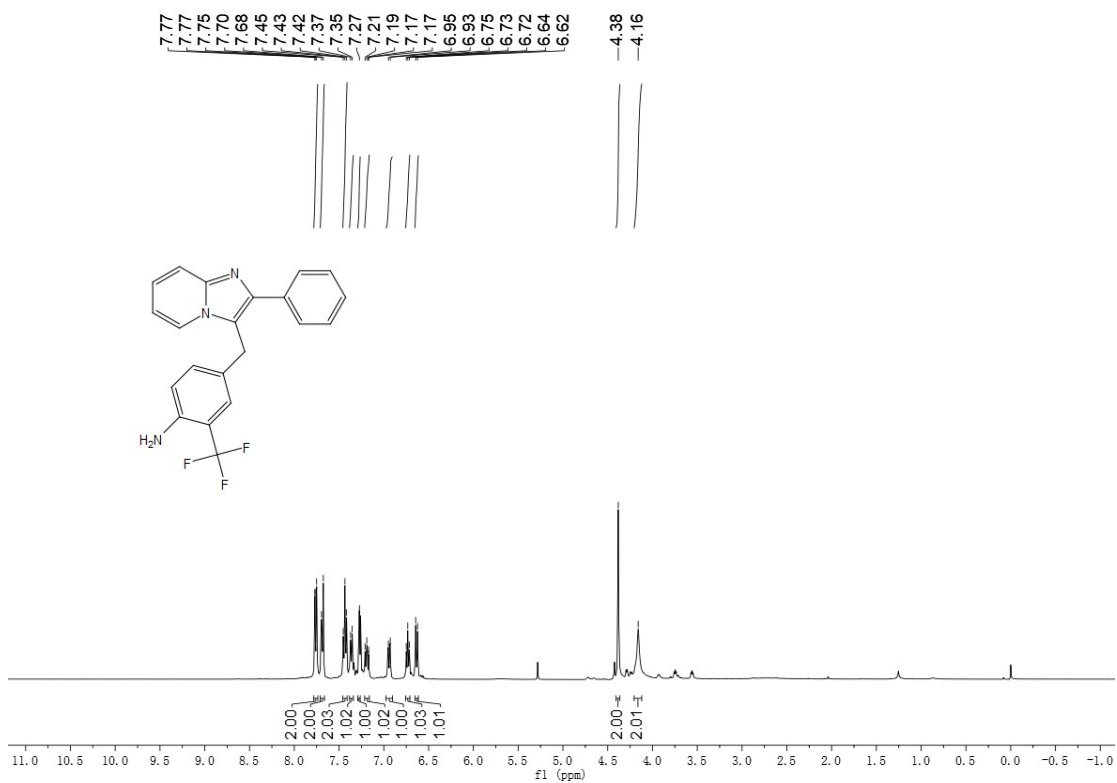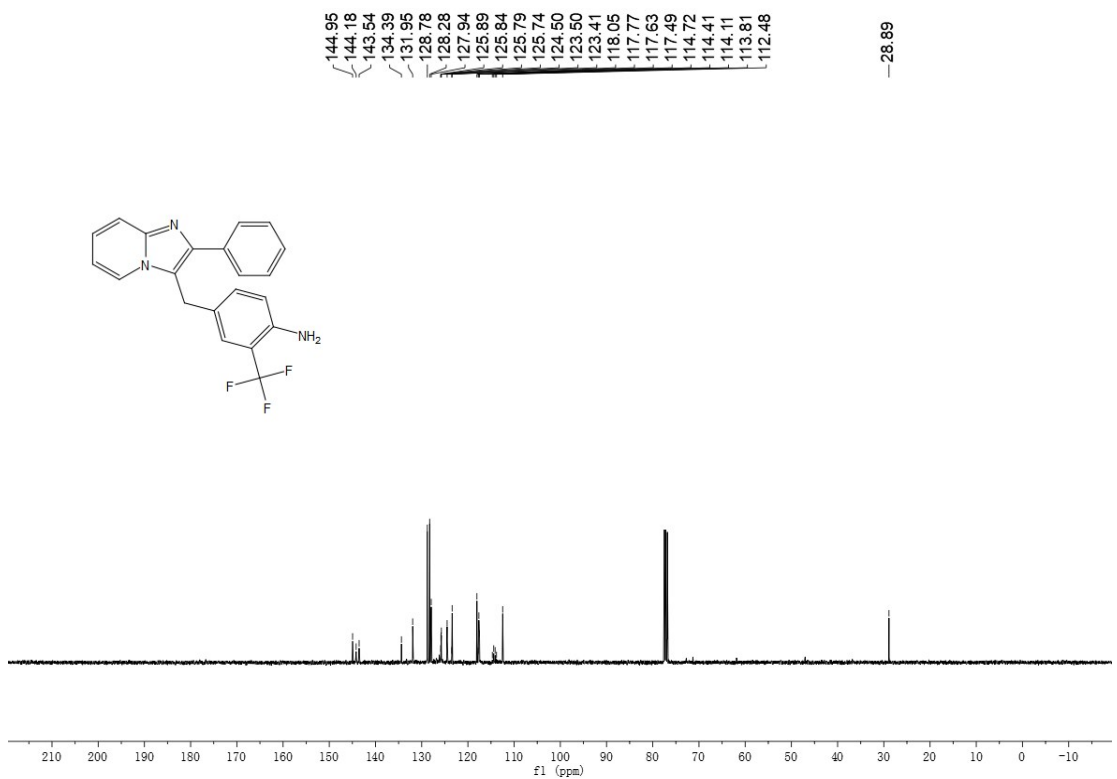



$^1\text{H}$  NMR and  $^{13}\text{C}$  NMR spectrum of compound **3ad**

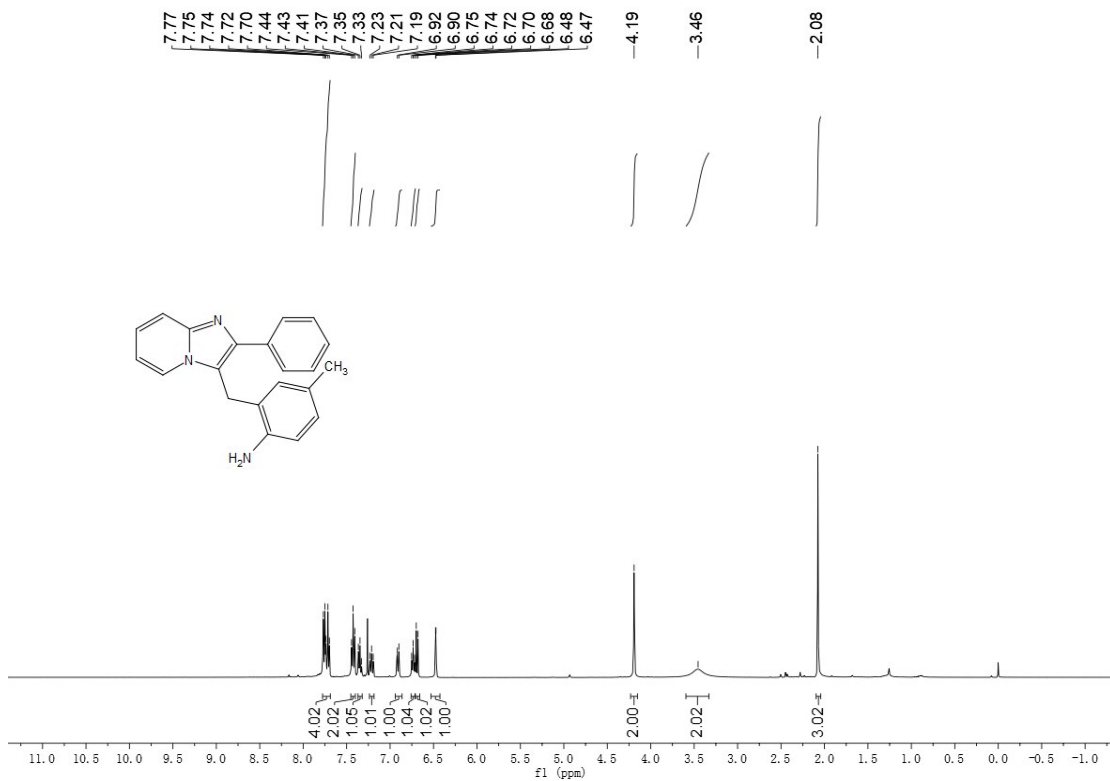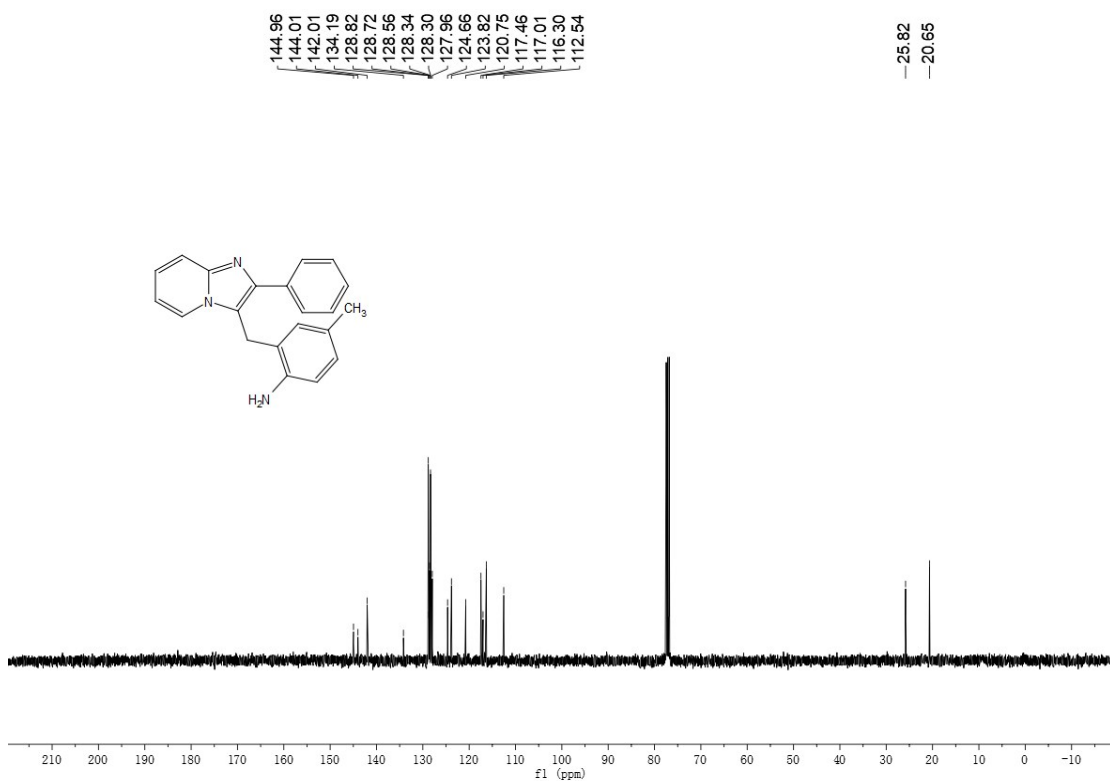

$^1\text{H}$  NMR and  $^{13}\text{C}$  NMR spectrum of compound **3ae**

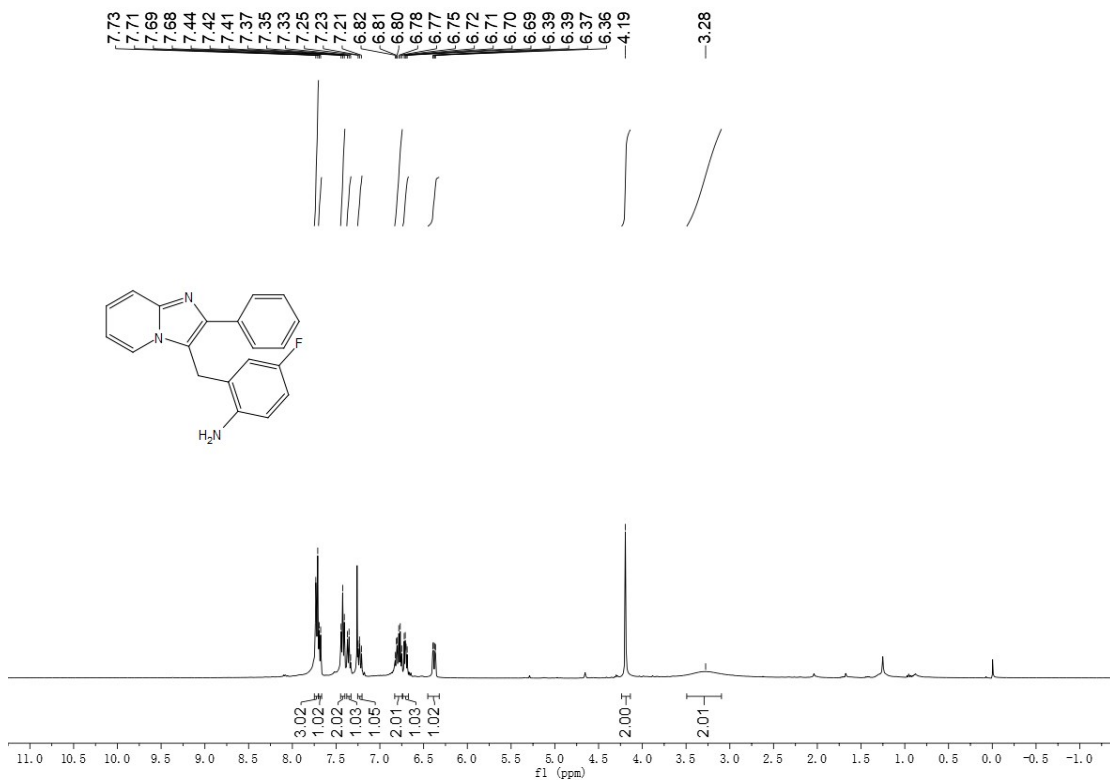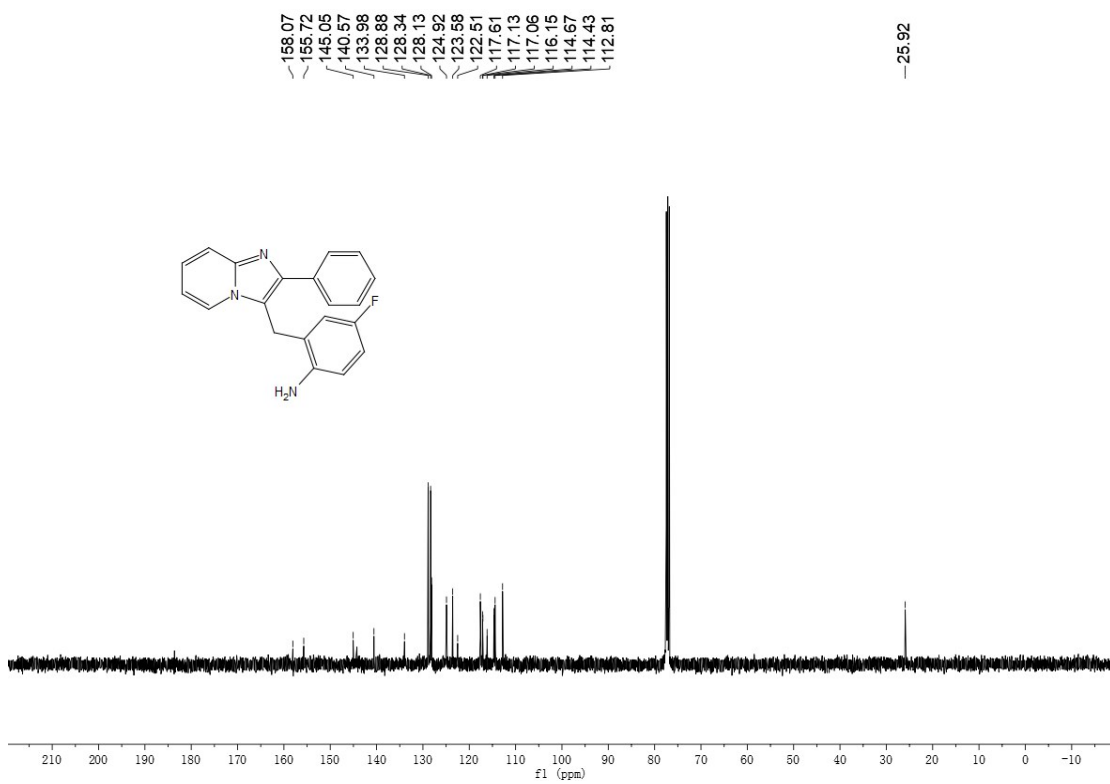

$^1\text{H}$  NMR and  $^{13}\text{C}$  NMR spectrum of compound **3af**

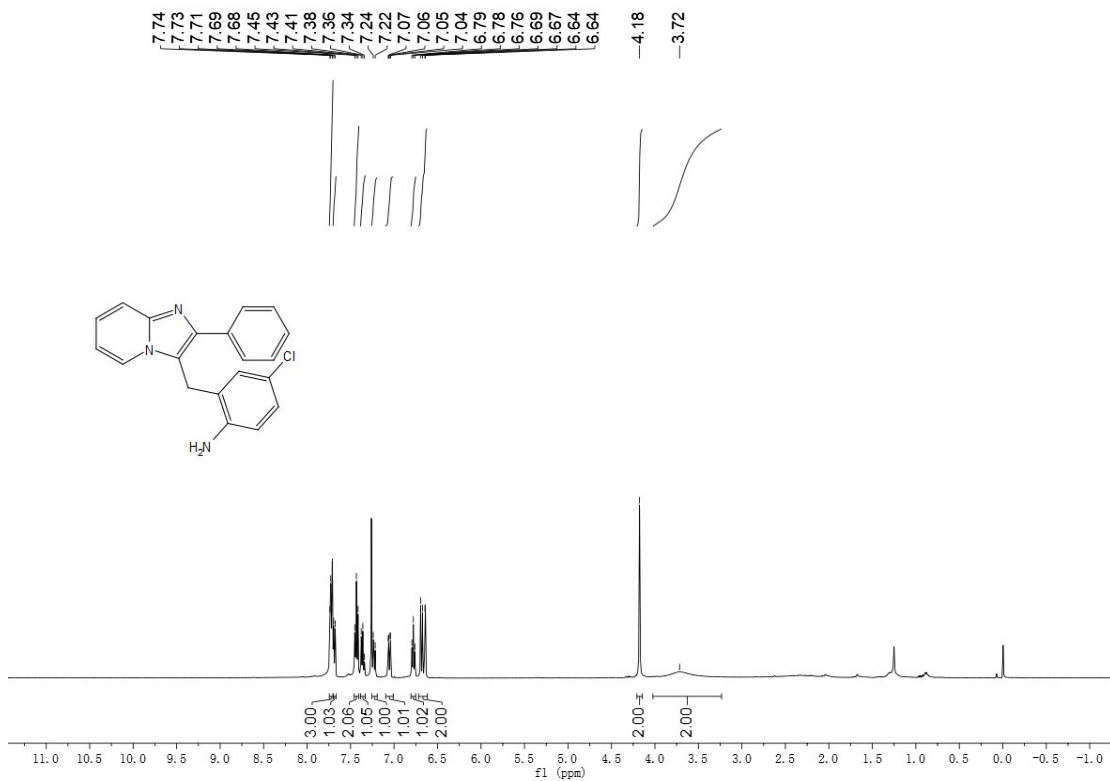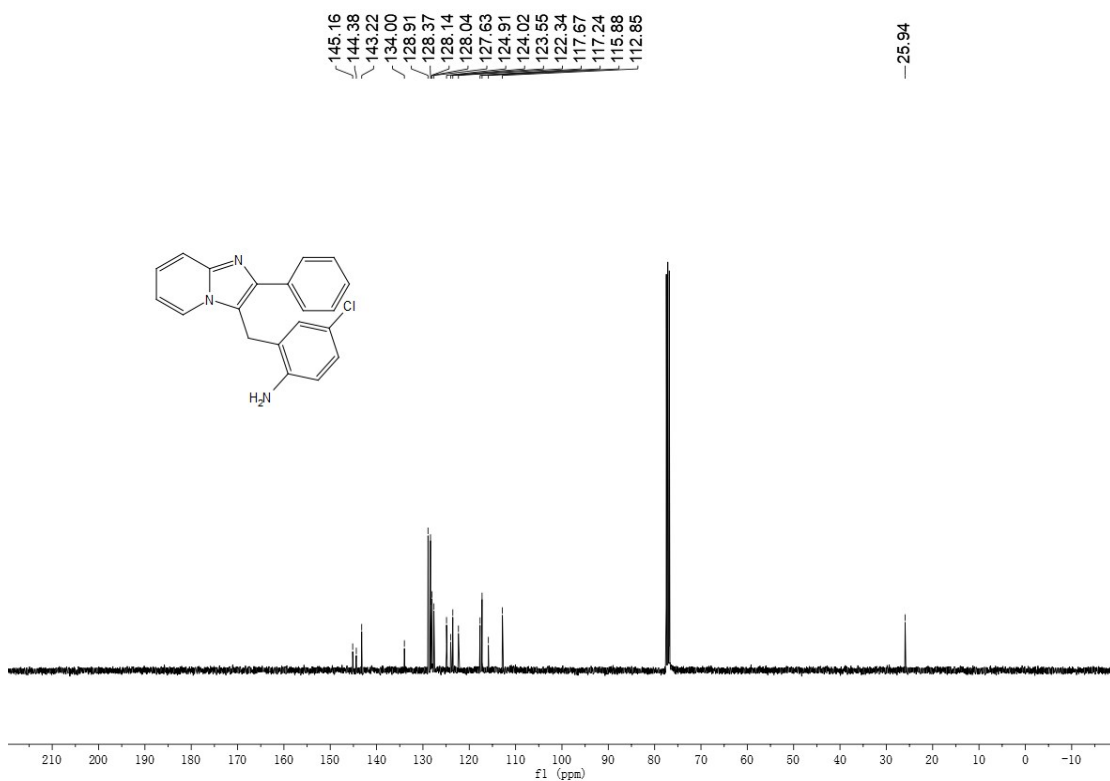

$^1\text{H}$  NMR and  $^{13}\text{C}$  NMR spectrum of compound **3ag**

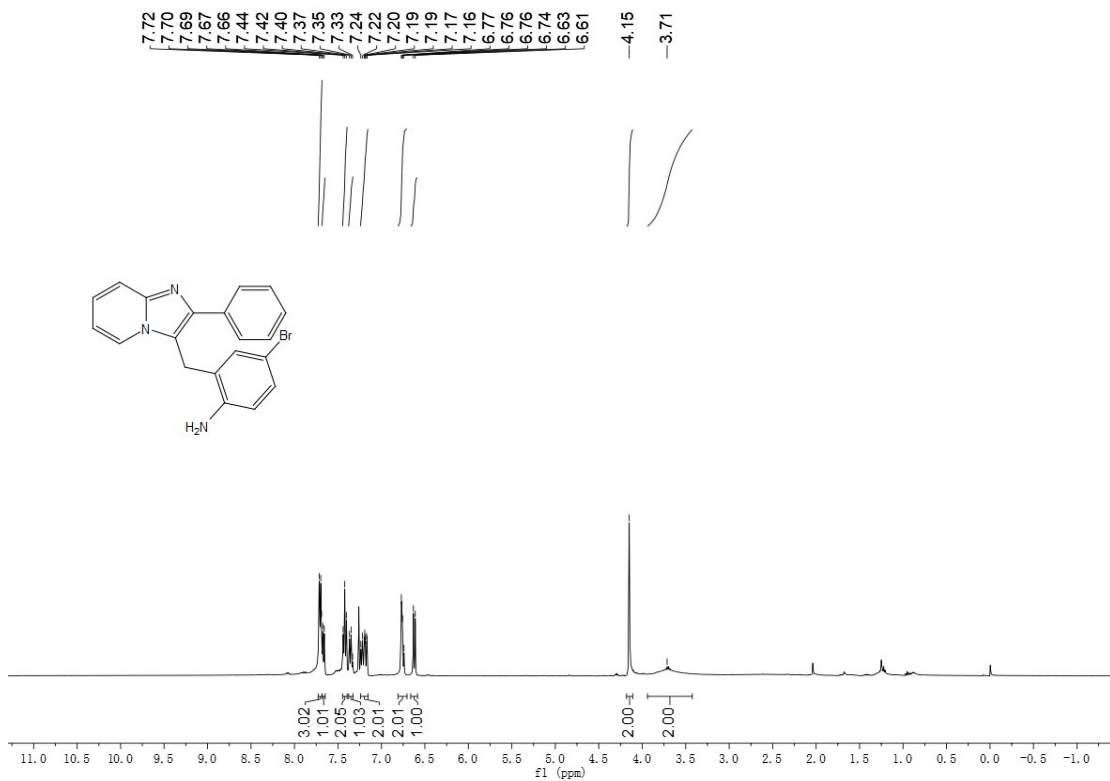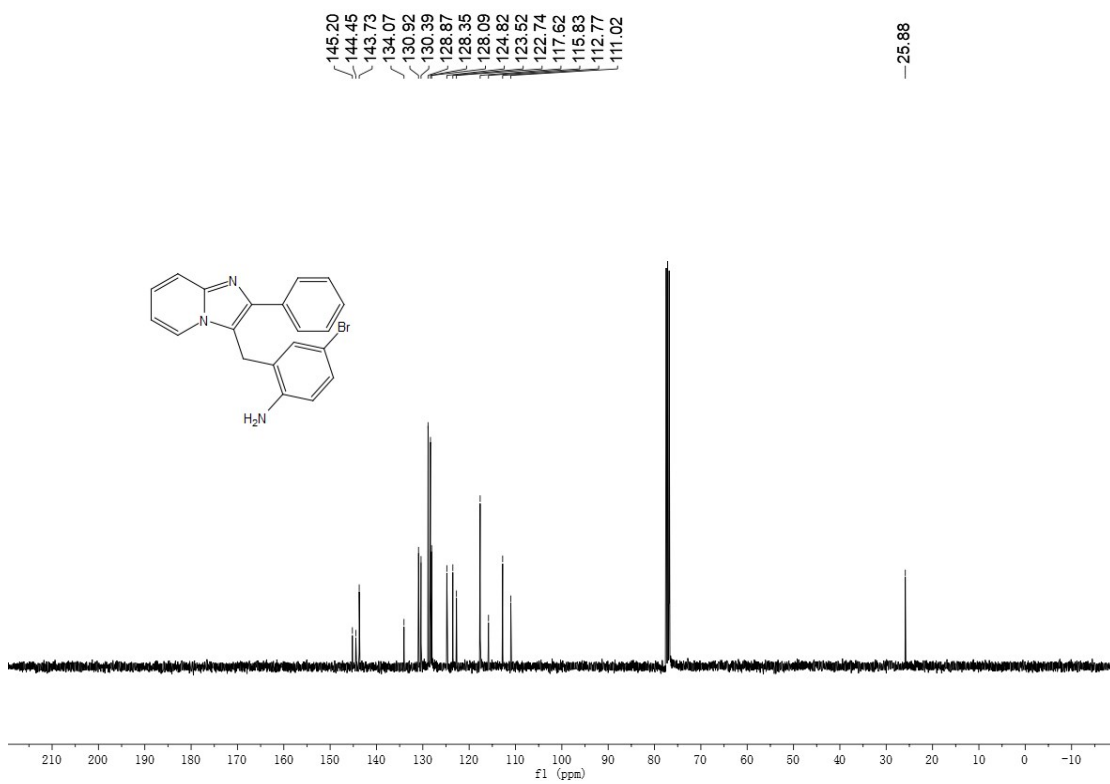

$^1\text{H}$  NMR and  $^{13}\text{C}$  NMR spectrum of compound **3ah**

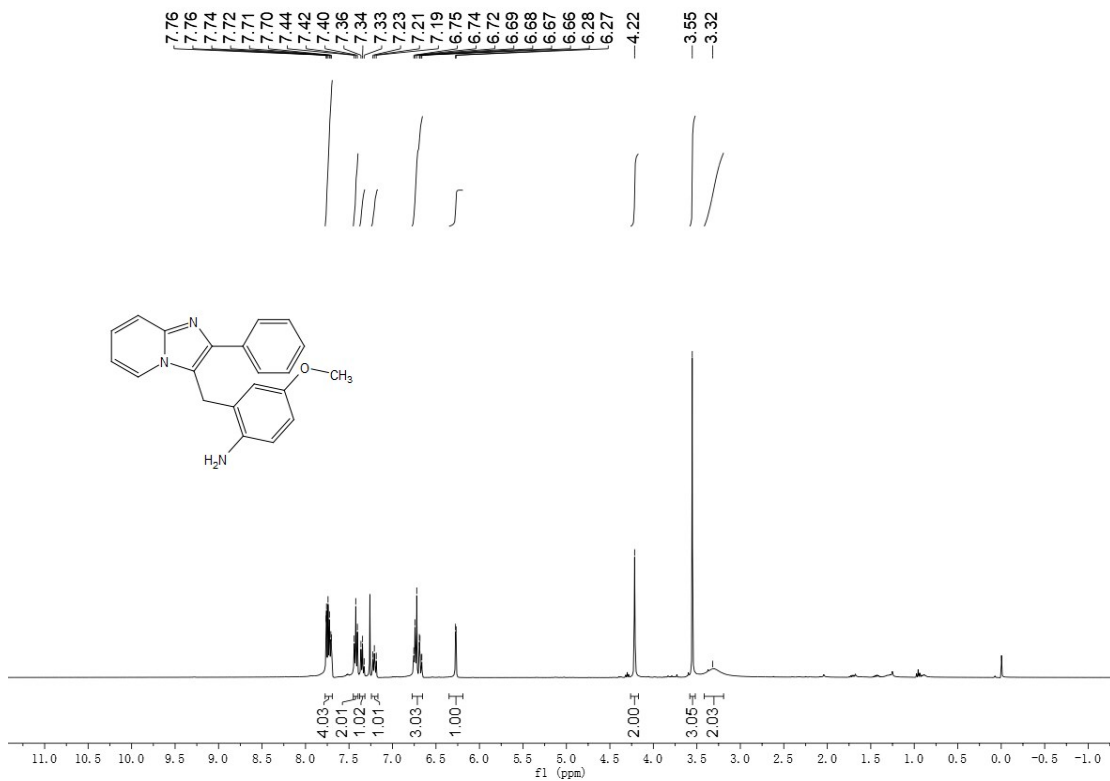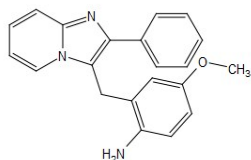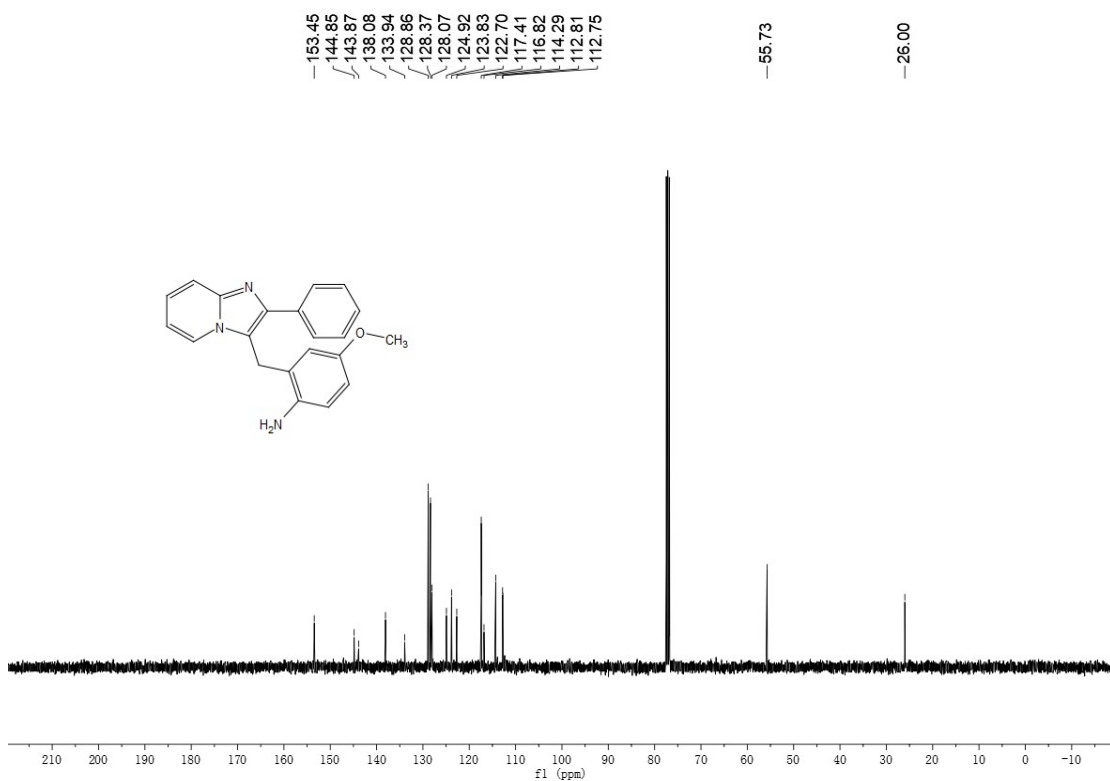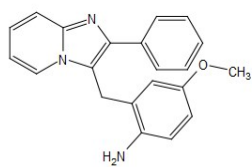

$^1\text{H}$  NMR and  $^{13}\text{C}$  NMR spectrum of compound **4a**

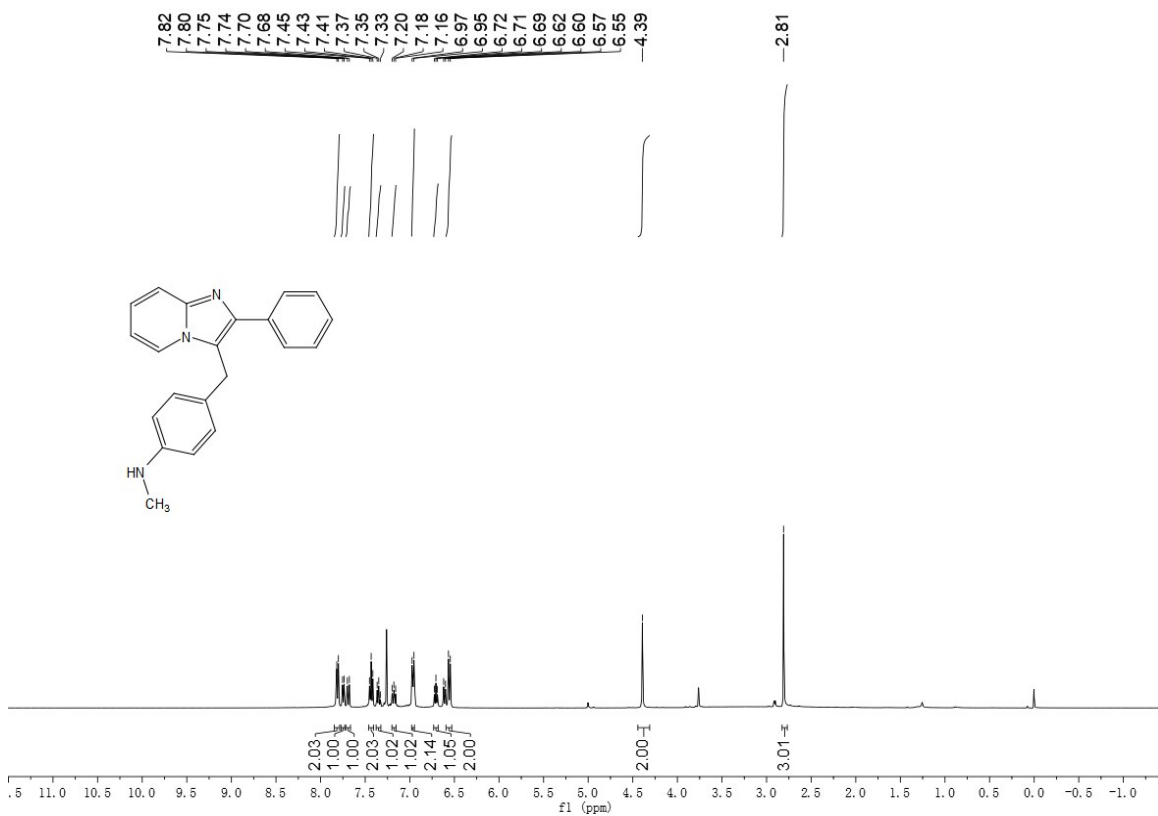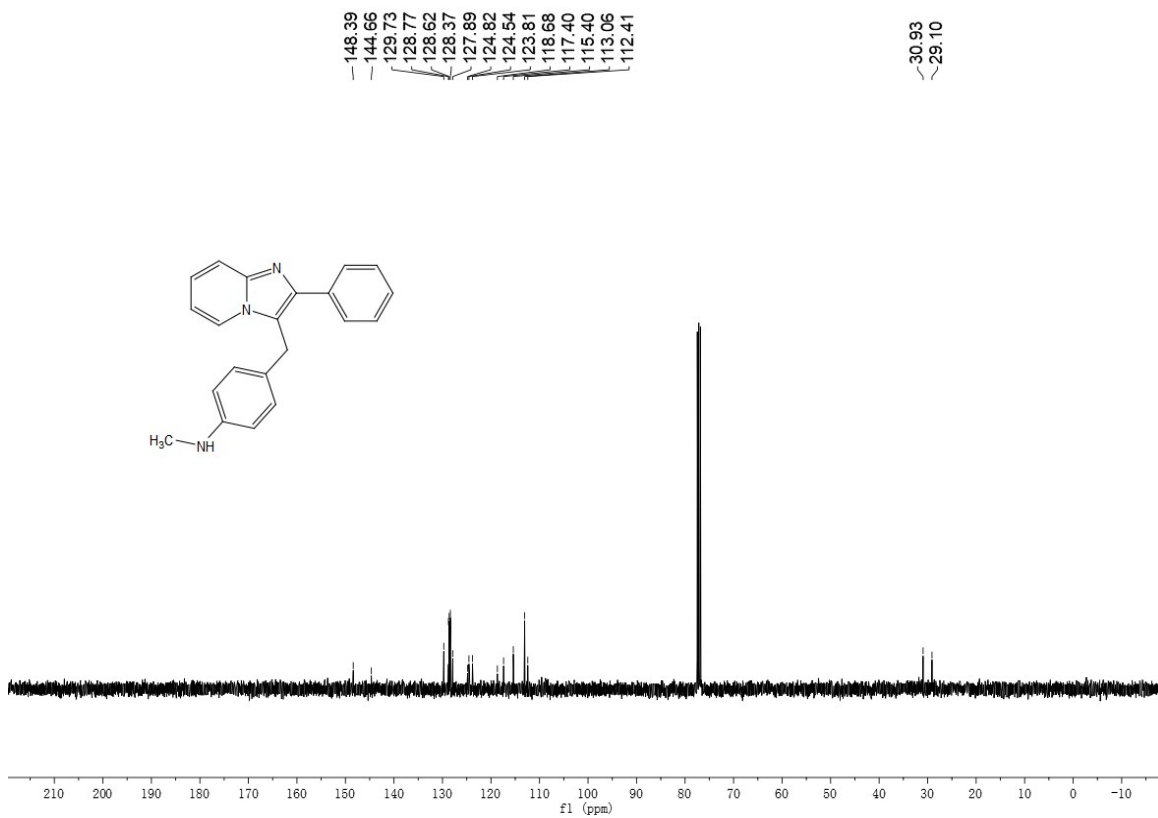

$^1\text{H}$  NMR and  $^{13}\text{C}$  NMR spectrum of compound **4b**

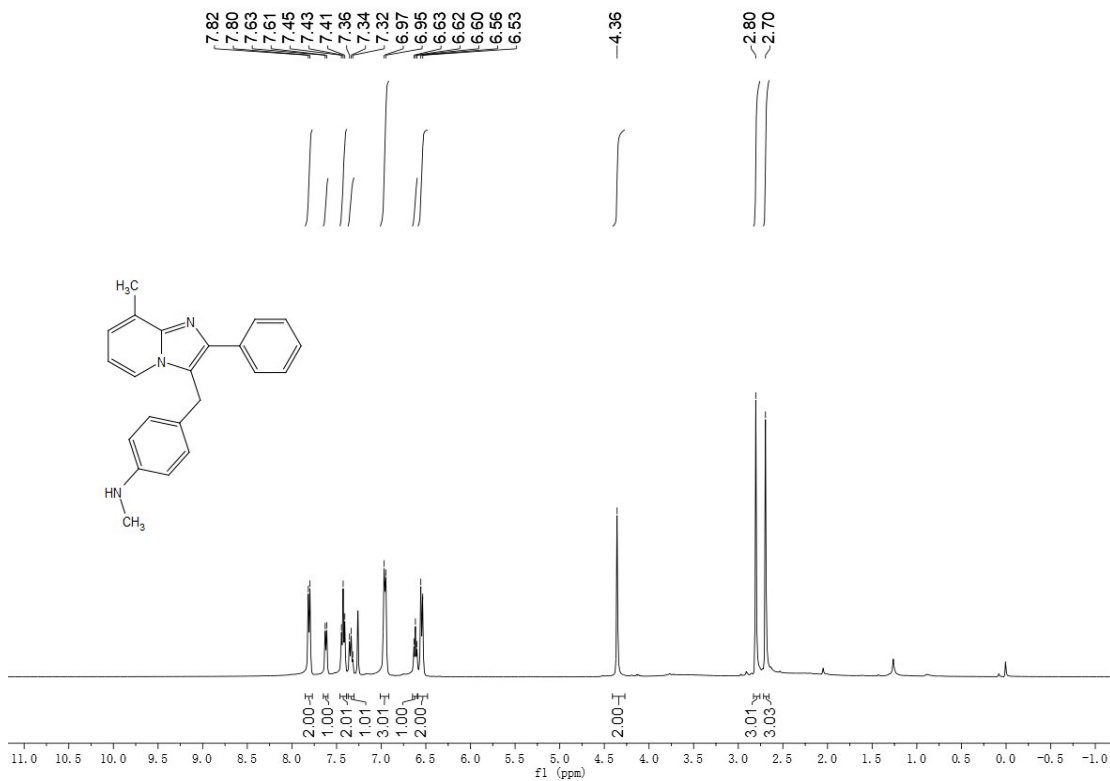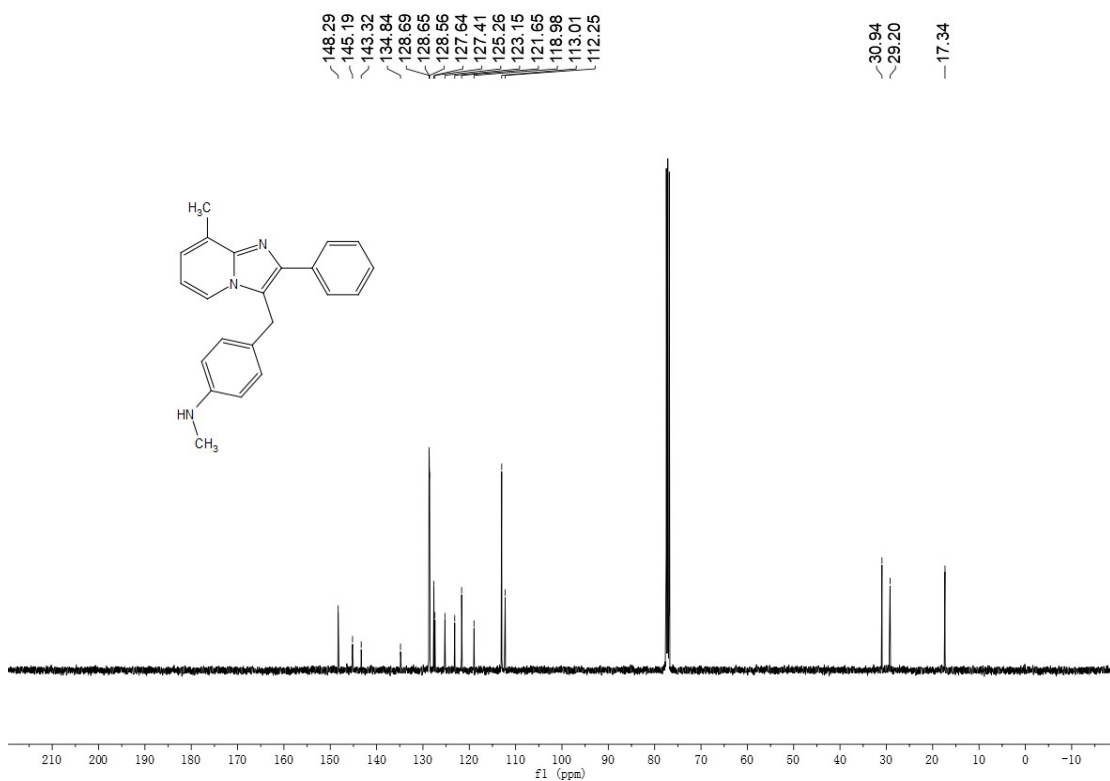

$^1\text{H}$  NMR and  $^{13}\text{C}$  NMR spectrum of compound **4c**

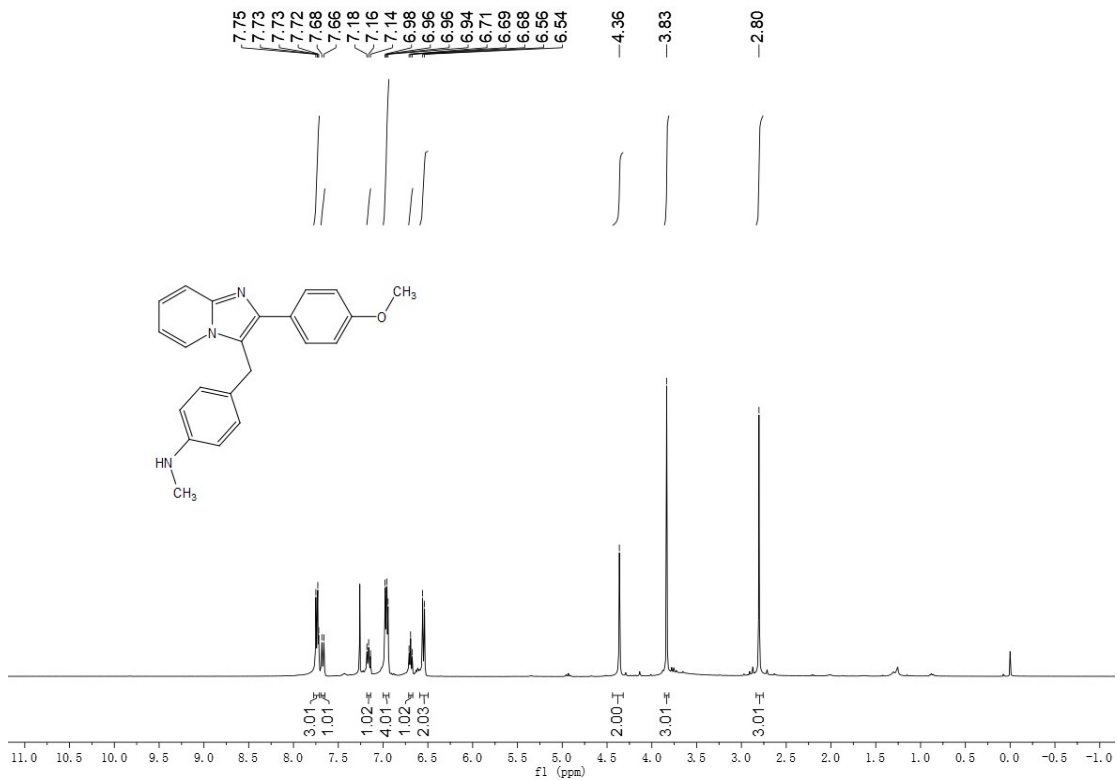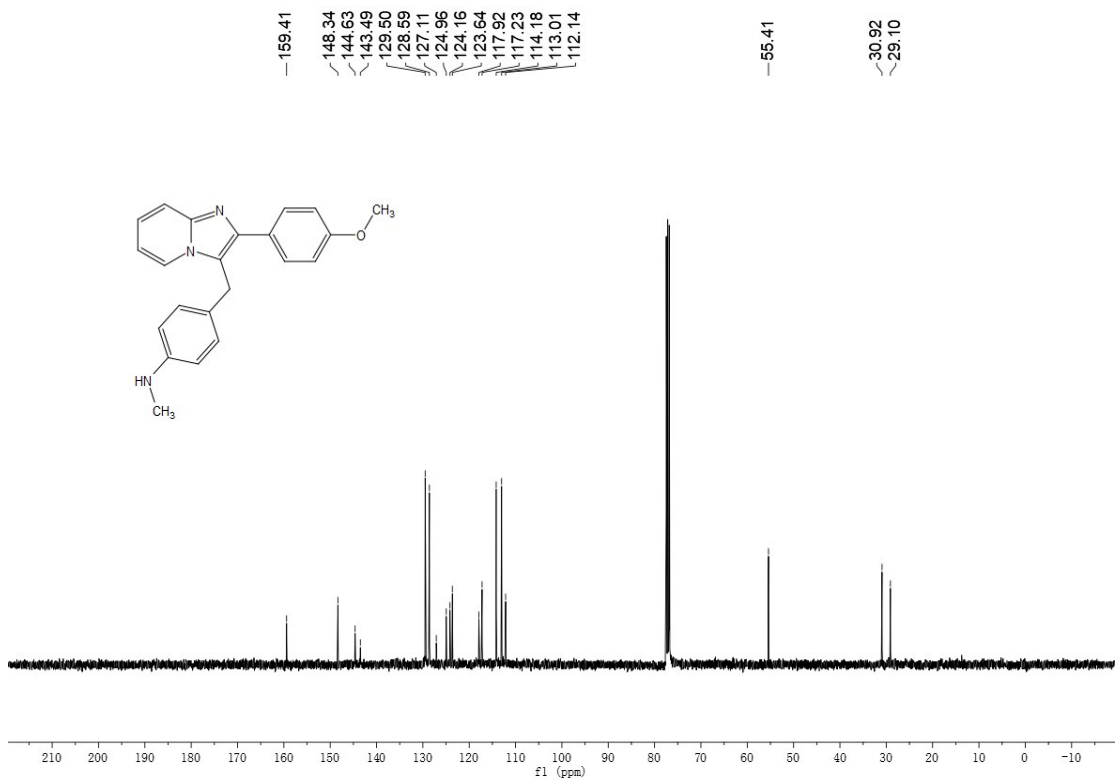





$^1\text{H}$  NMR and  $^{13}\text{C}$  NMR spectrum of compound **4e**

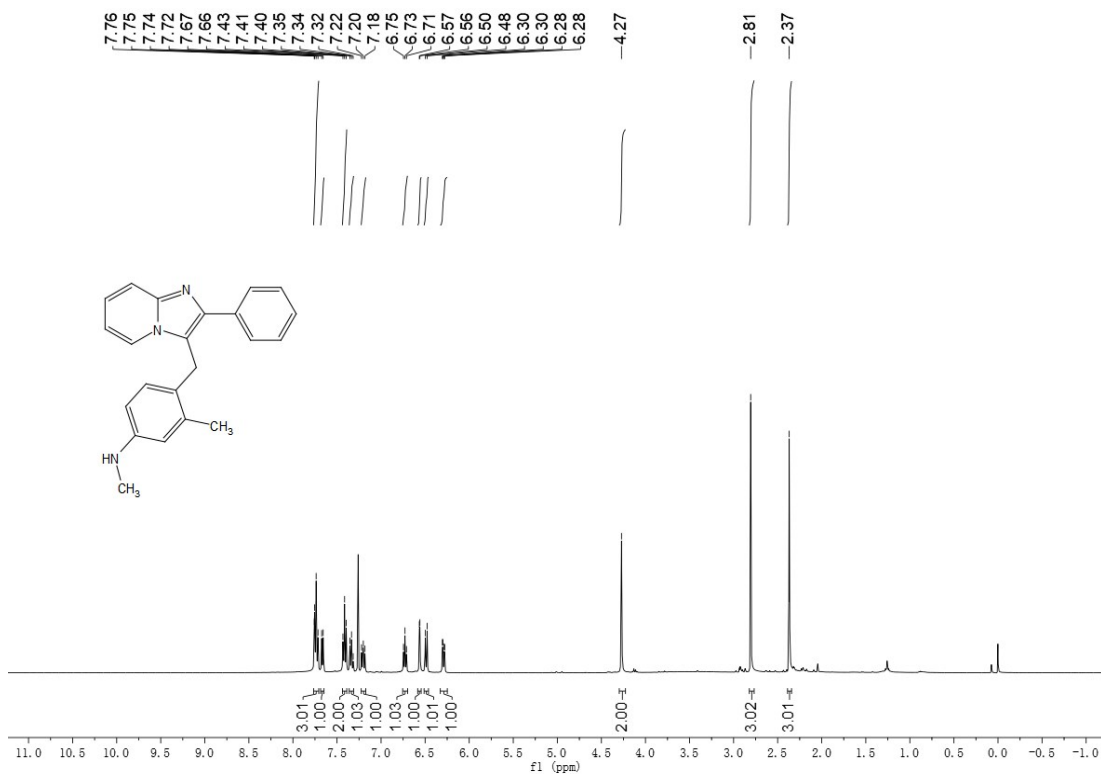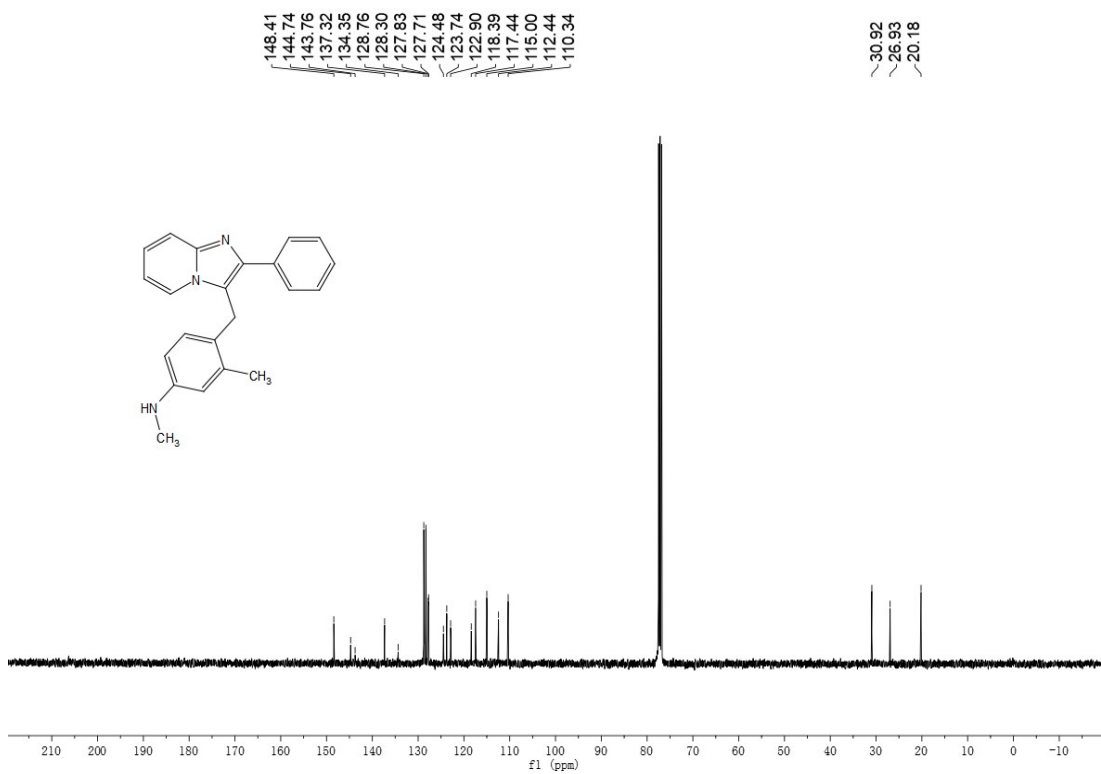

$^1\text{H}$  NMR and  $^{13}\text{C}$  NMR spectrum of compound **4f**

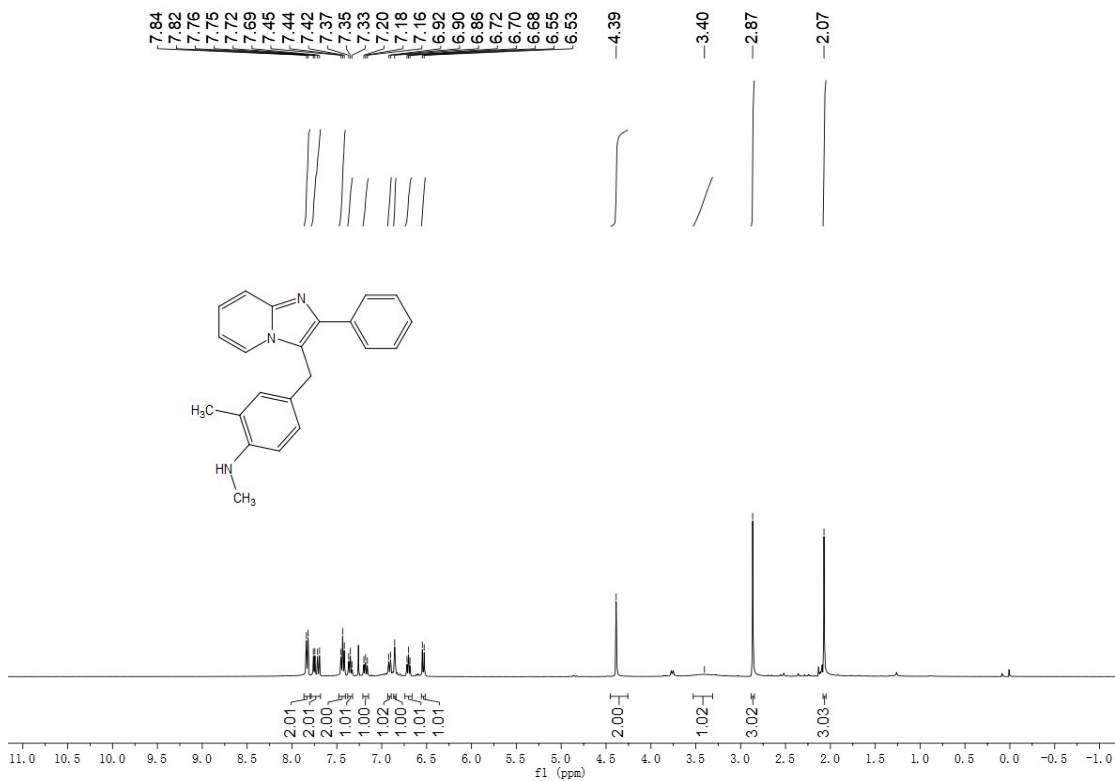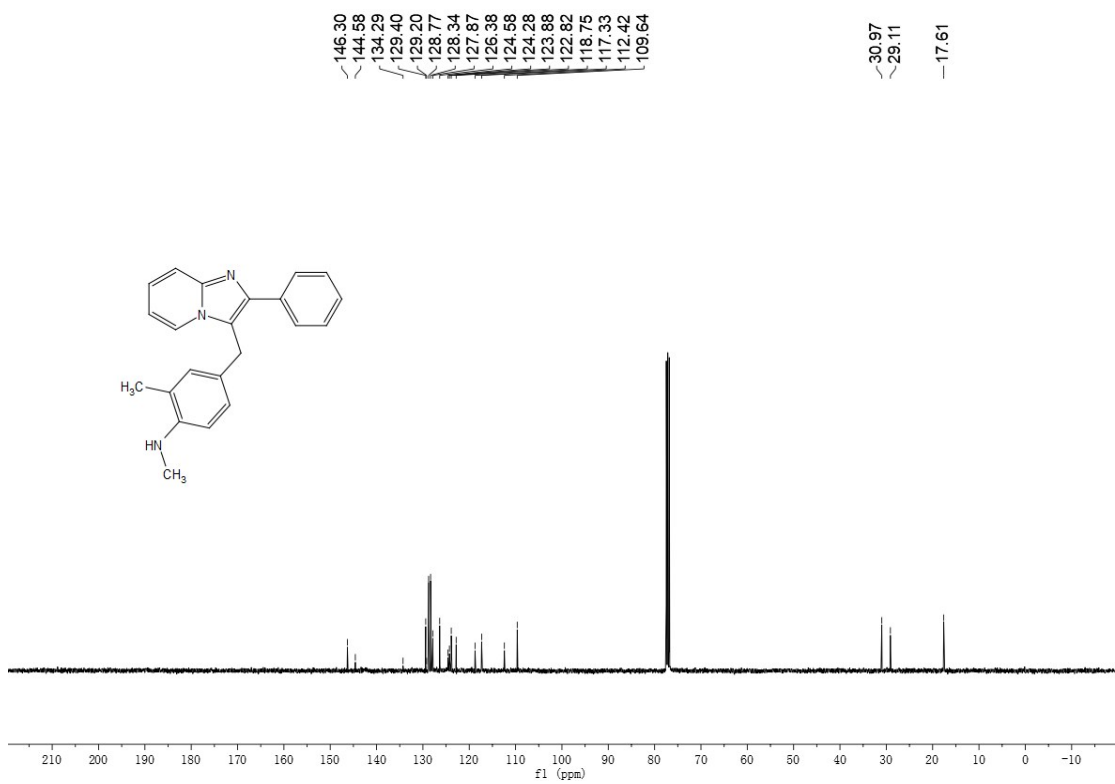

$^1\text{H}$  NMR and  $^{13}\text{C}$  NMR spectrum of compound **4g**

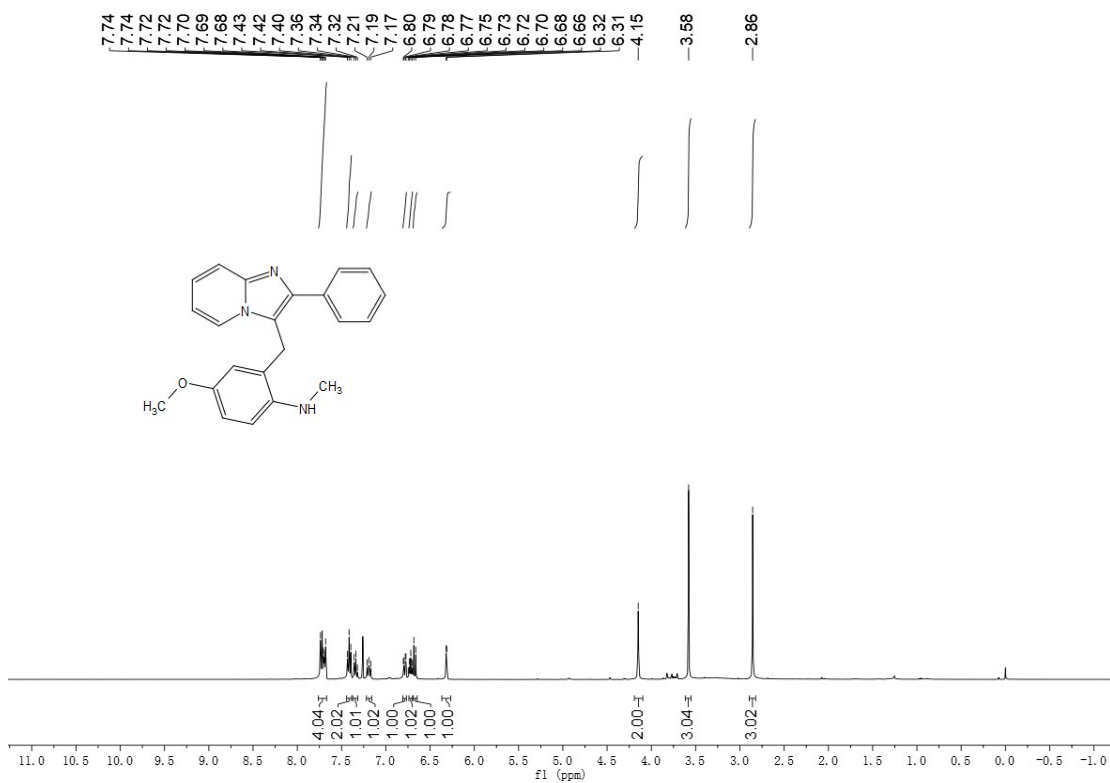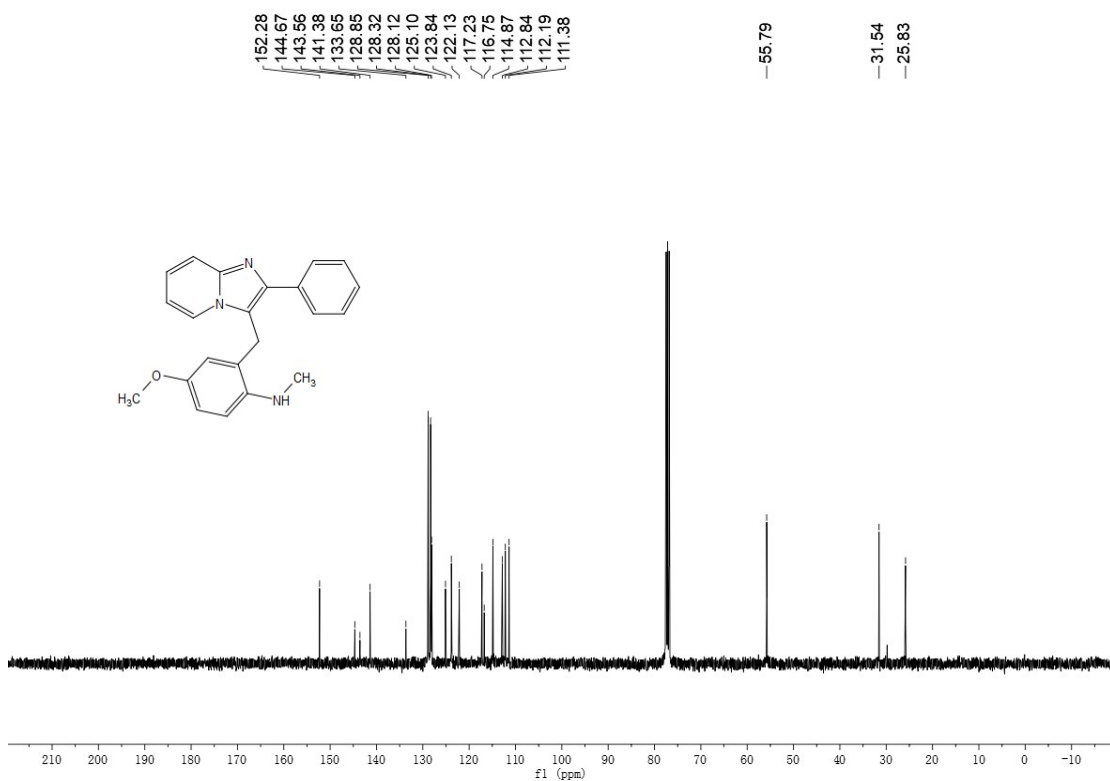

$^1\text{H}$  NMR and  $^{13}\text{C}$  NMR spectrum of compound **4h**

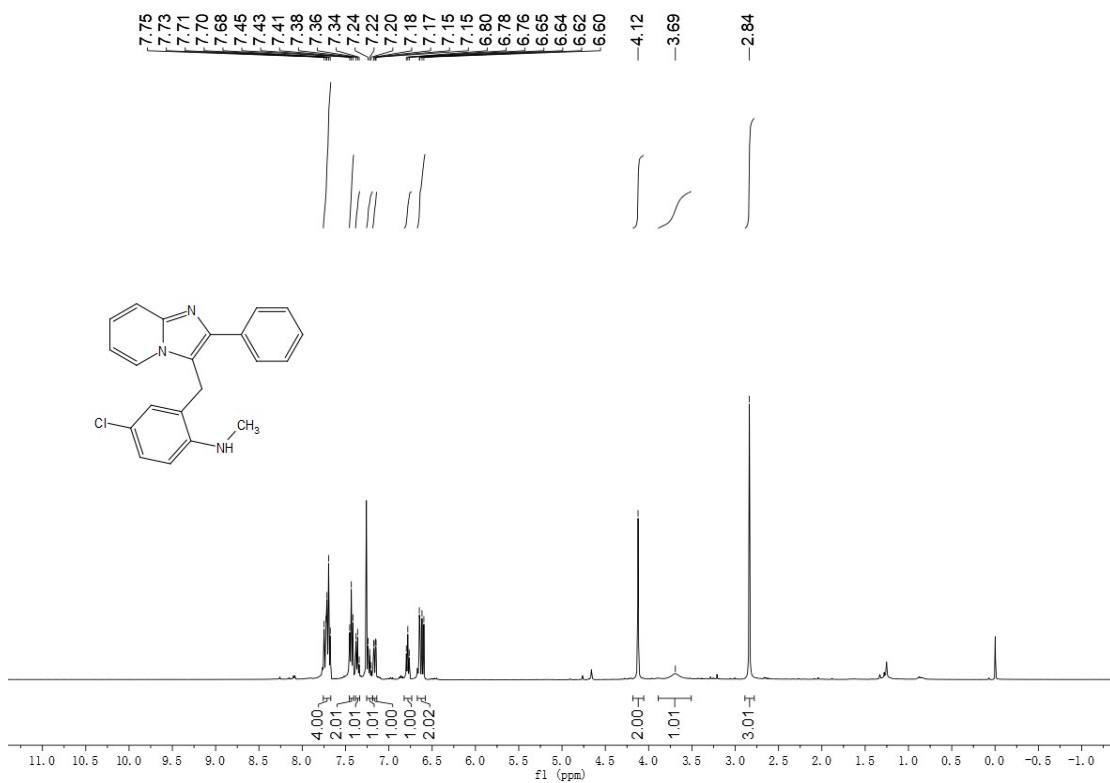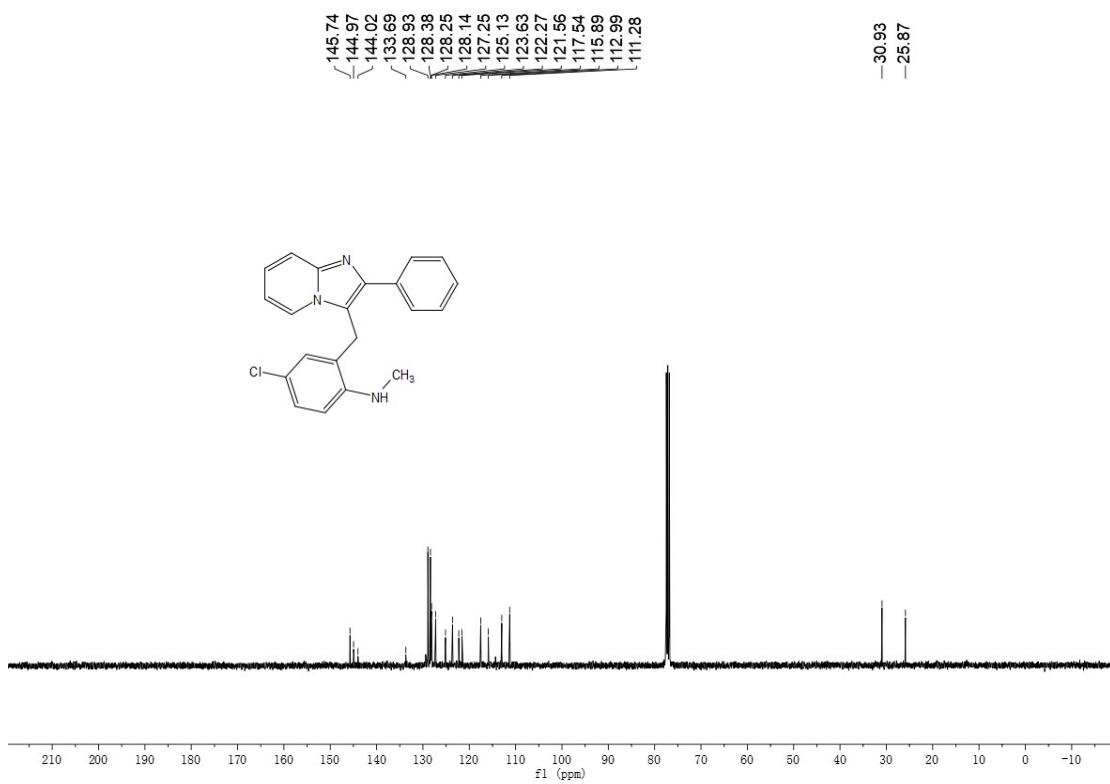

<sup>1</sup>H NMR and <sup>13</sup>C NMR spectrum of compound **4i**

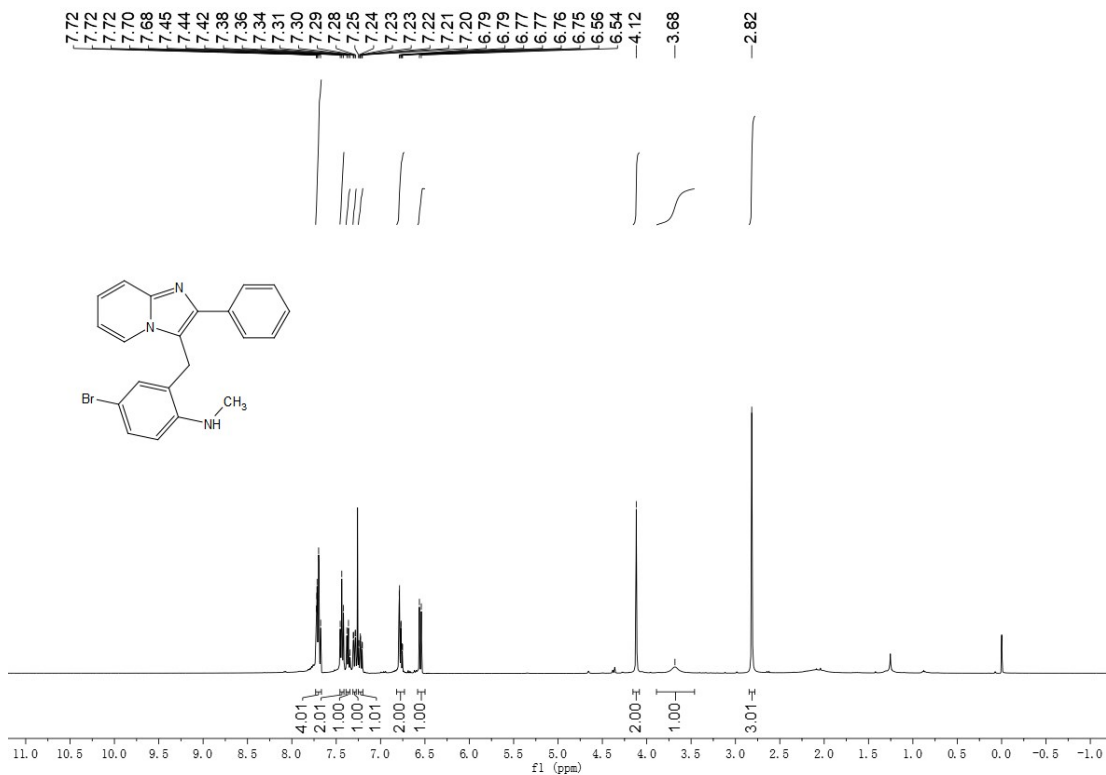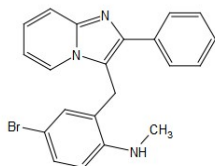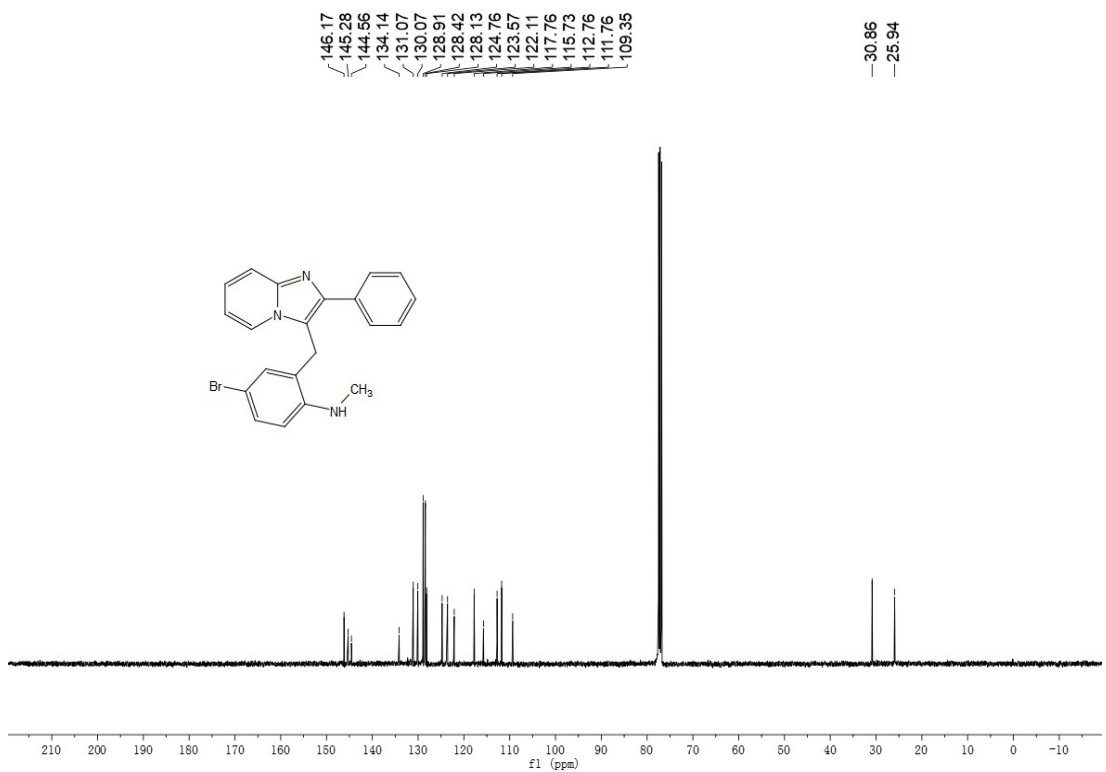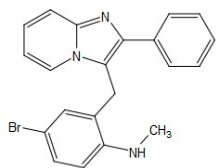

# $^1\text{H}$ NMR and $^{13}\text{C}$ NMR spectrum of compound **5a**

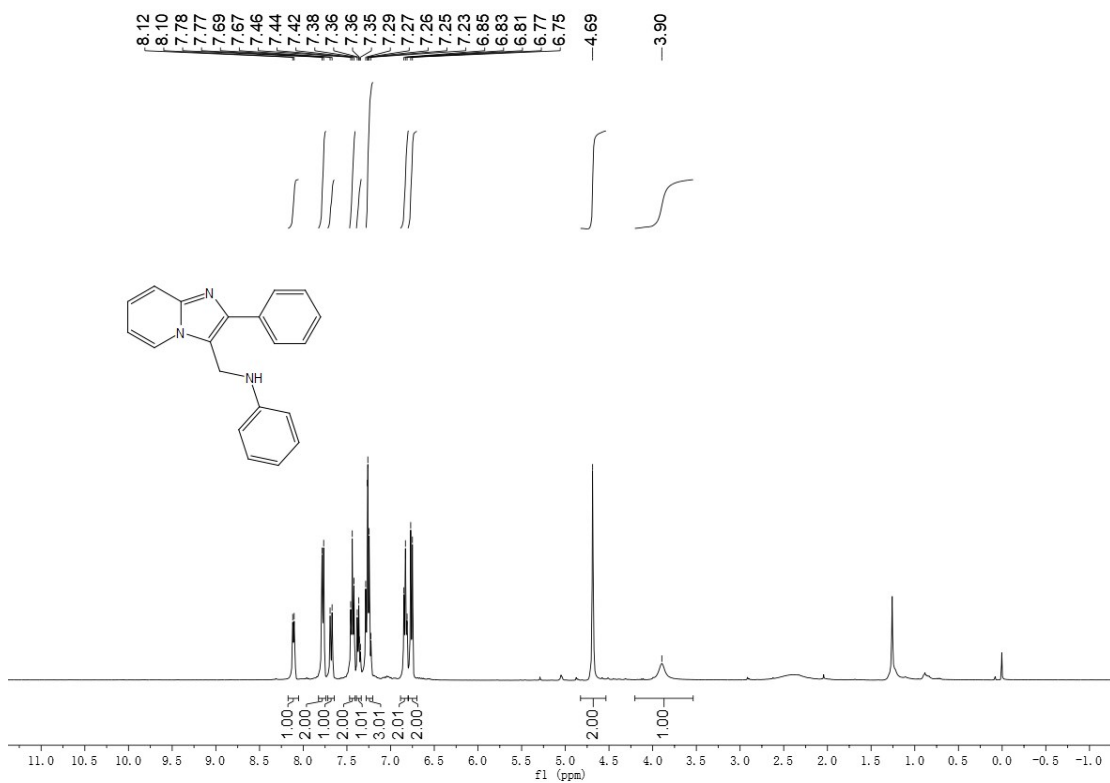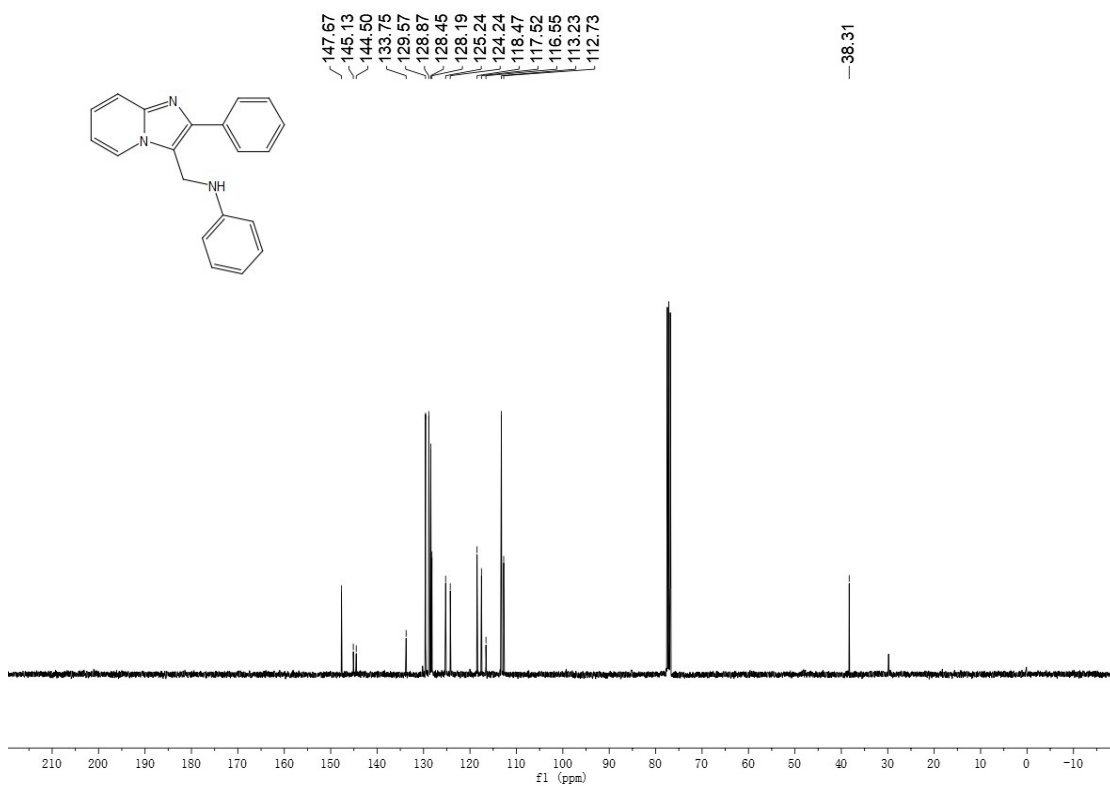

$^1\text{H}$  NMR and  $^{13}\text{C}$  NMR spectrum of compound **5b**

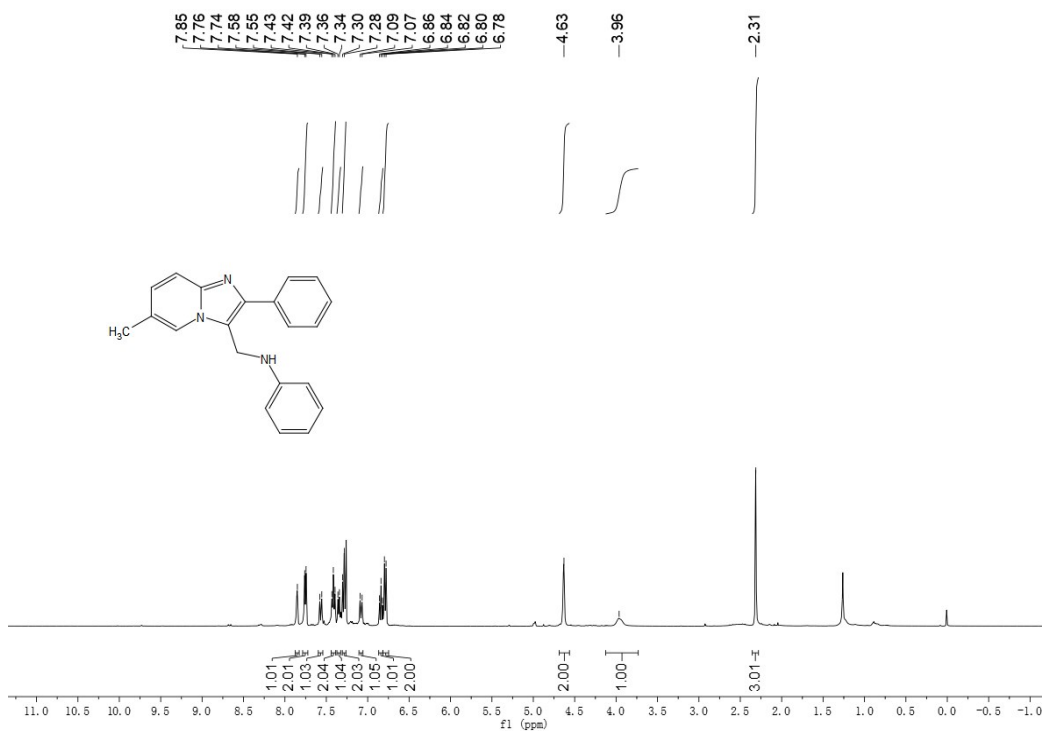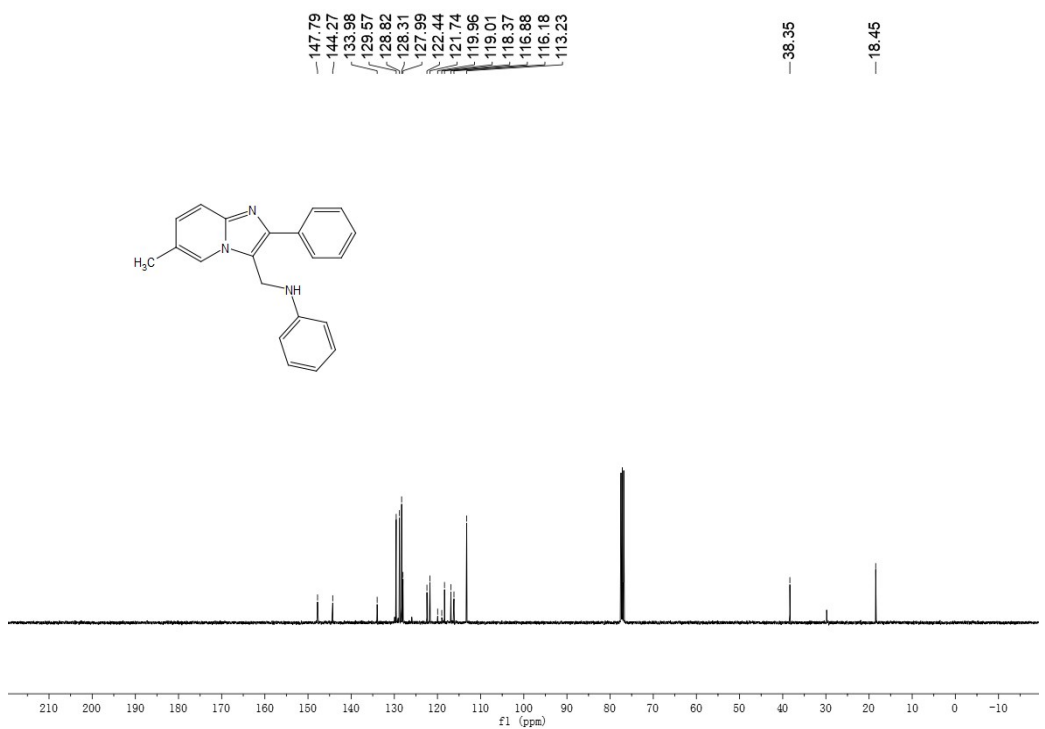



$^1\text{H}$  NMR and  $^{13}\text{C}$  NMR spectrum of compound **5c**

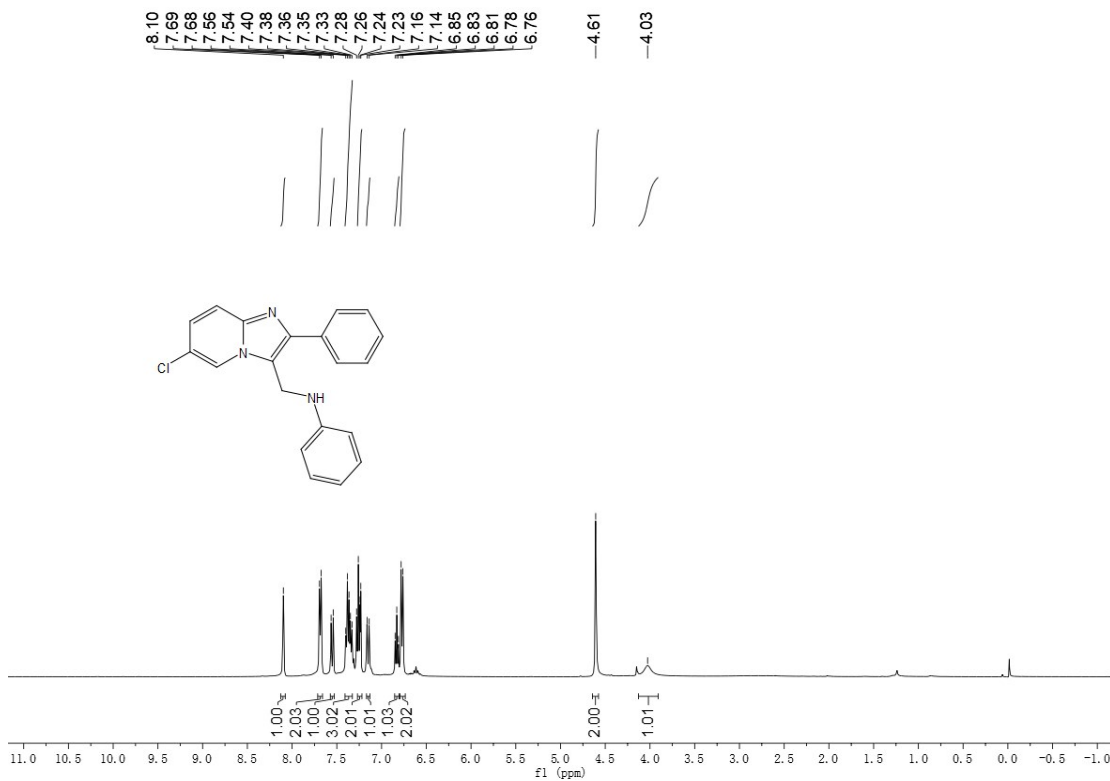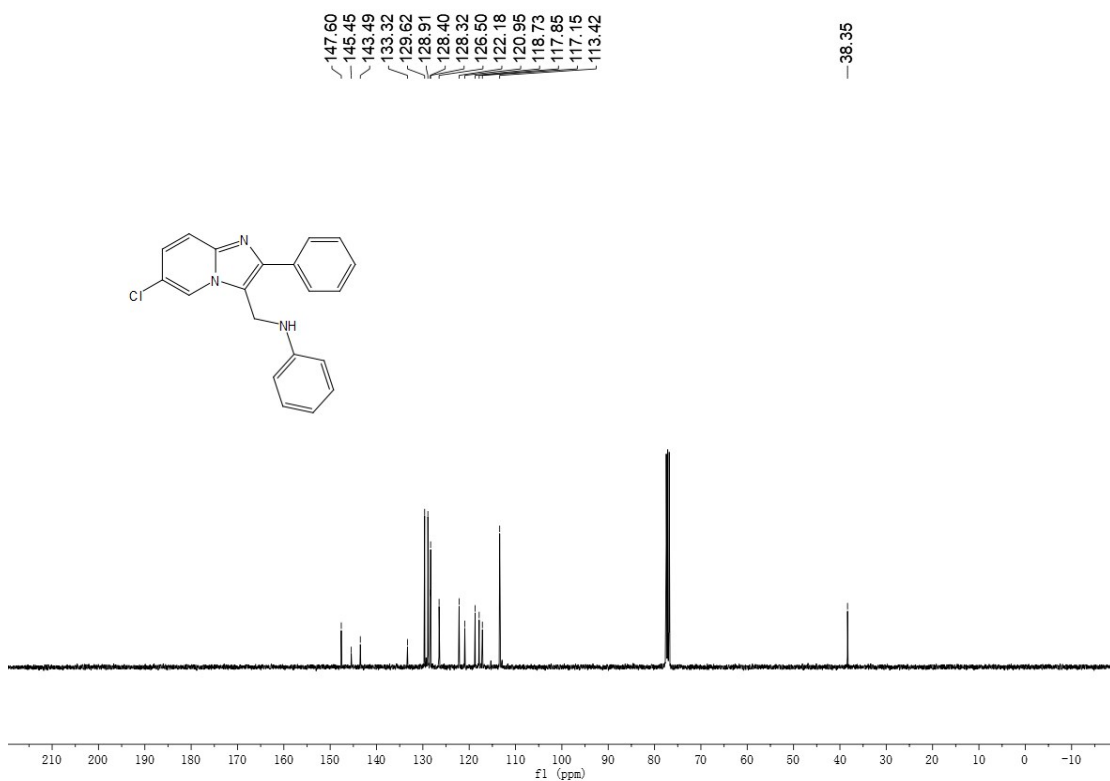

$^1\text{H}$  NMR and  $^{13}\text{C}$  NMR spectrum of compound **5d**

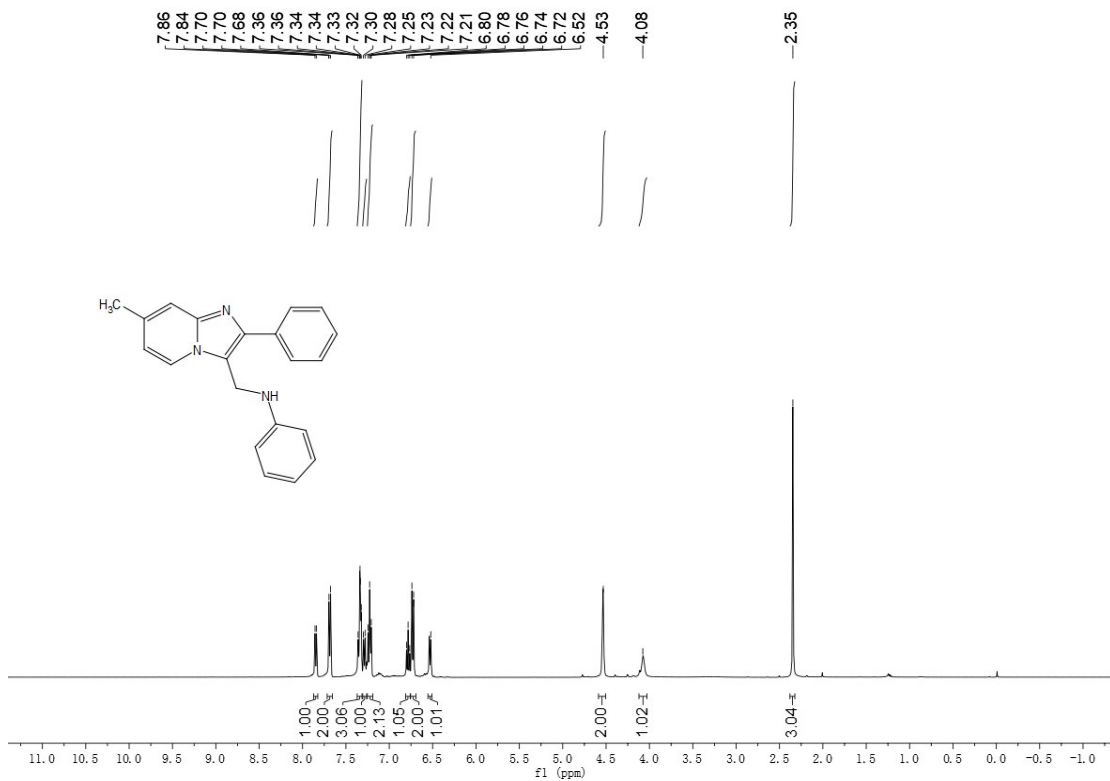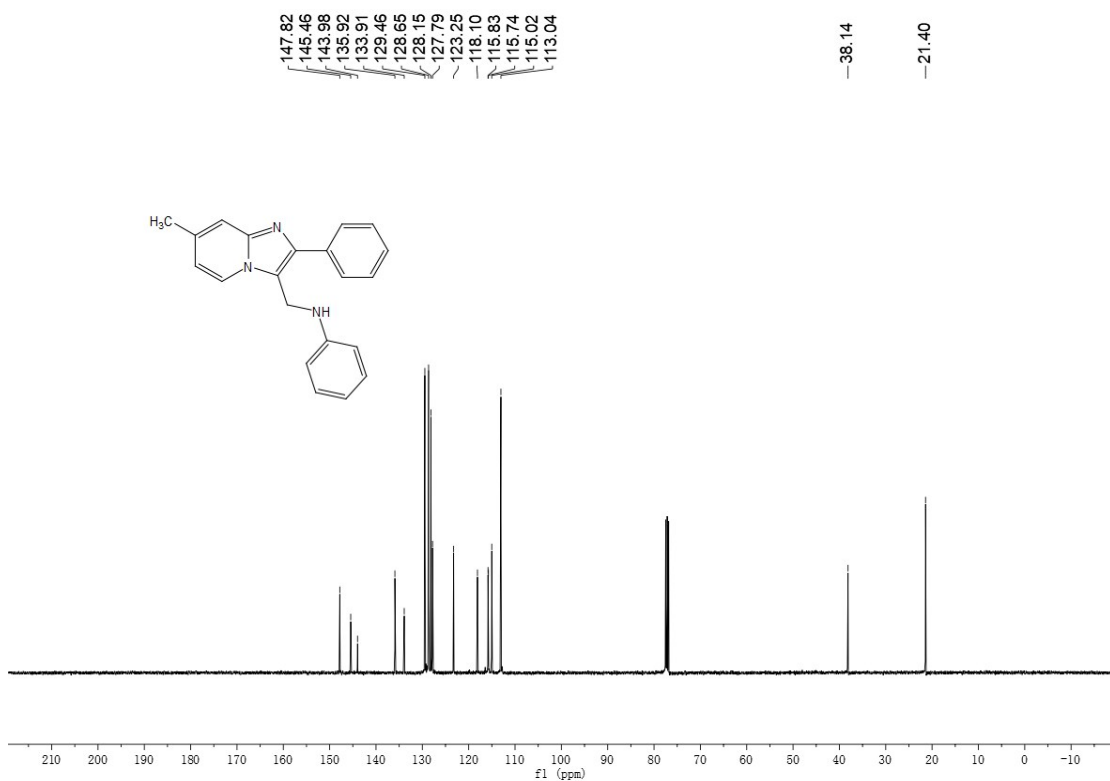

# $^1\text{H}$ NMR and $^{13}\text{C}$ NMR spectrum of compound **5e**

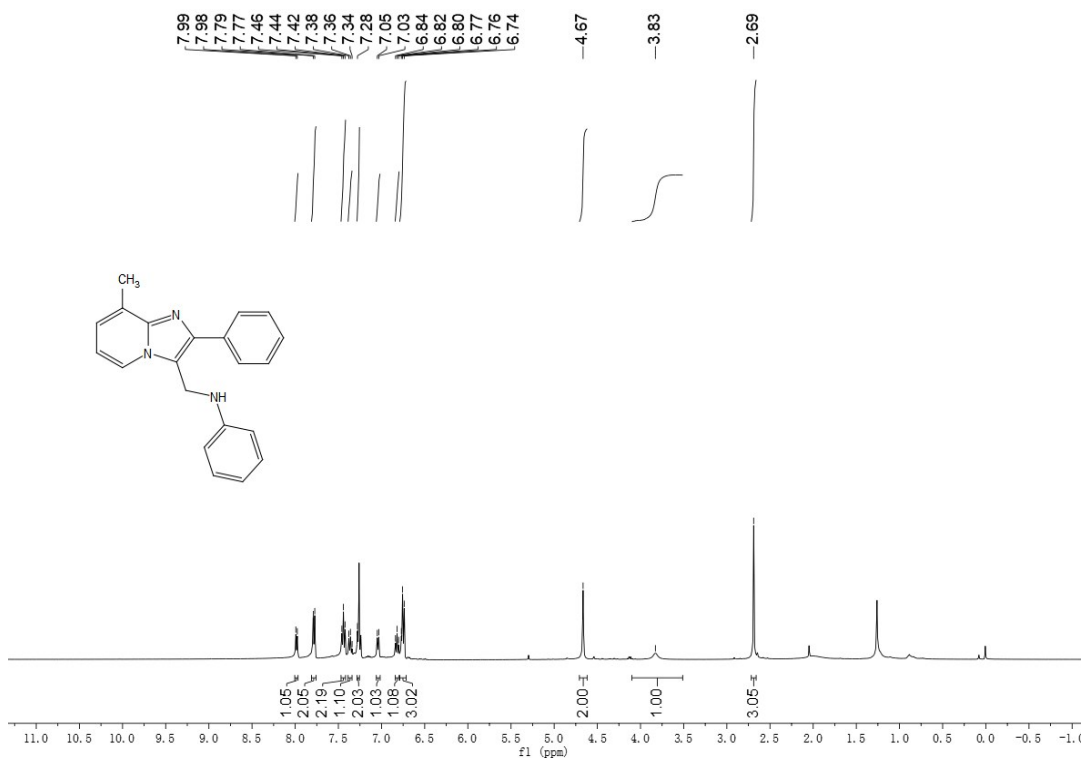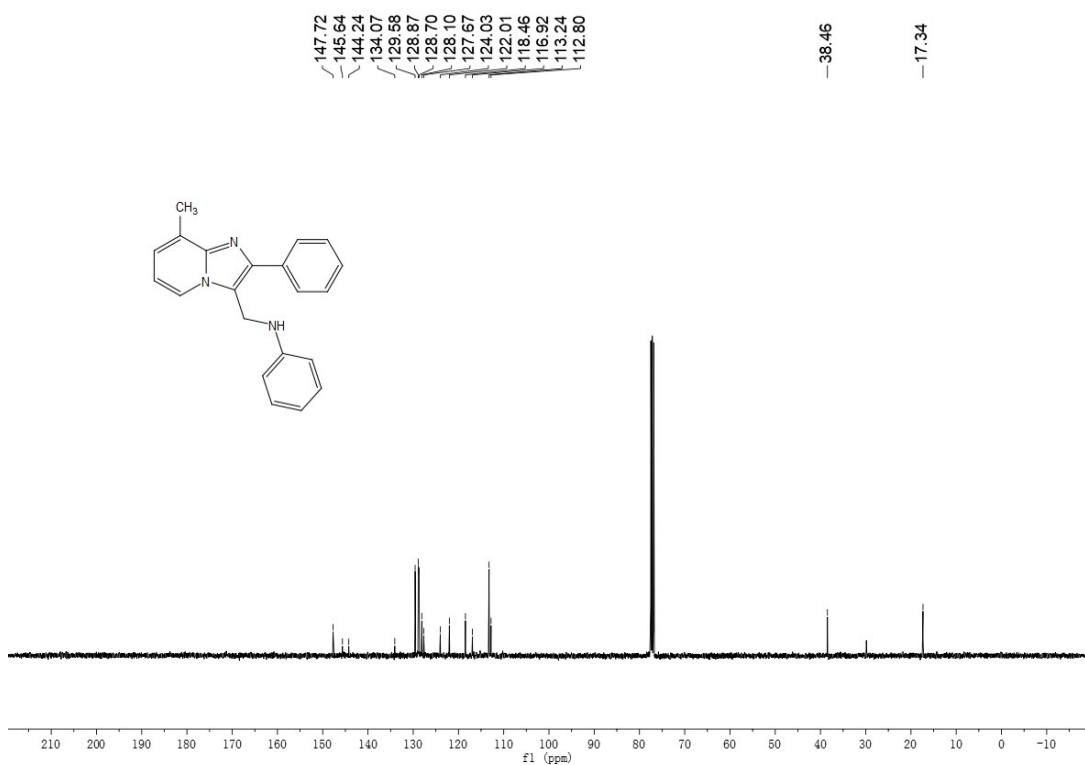

$^1\text{H}$  NMR and  $^{13}\text{C}$  NMR spectrum of compound **5f**

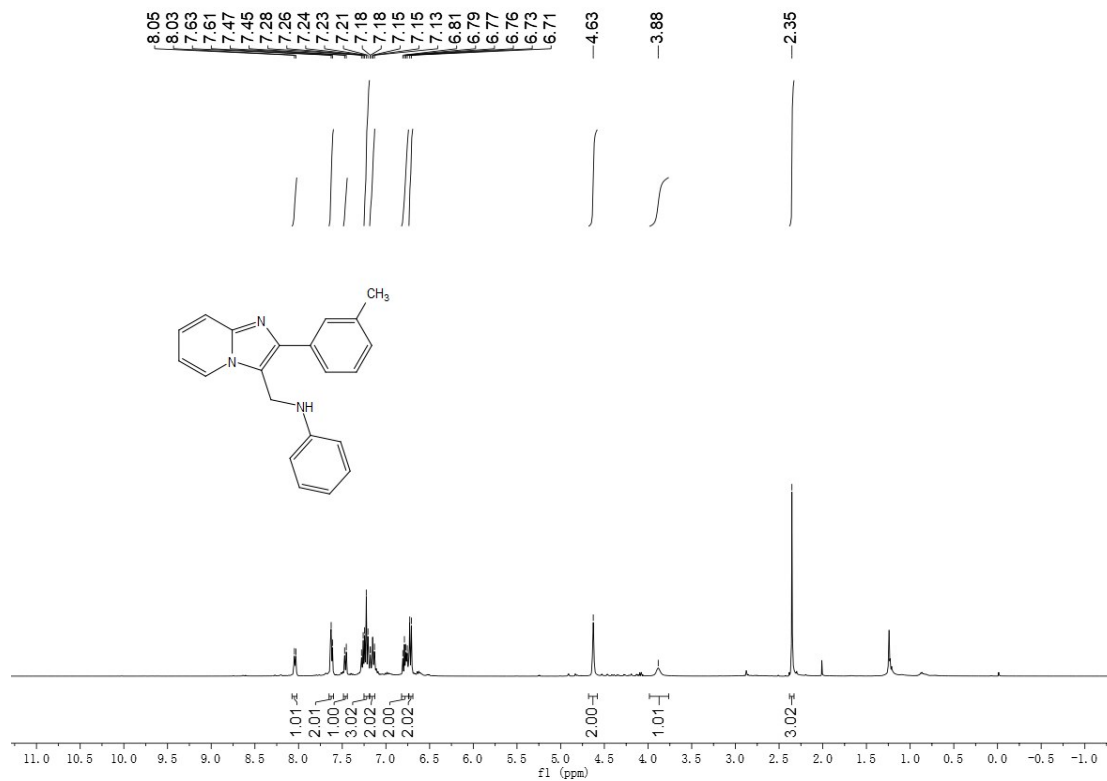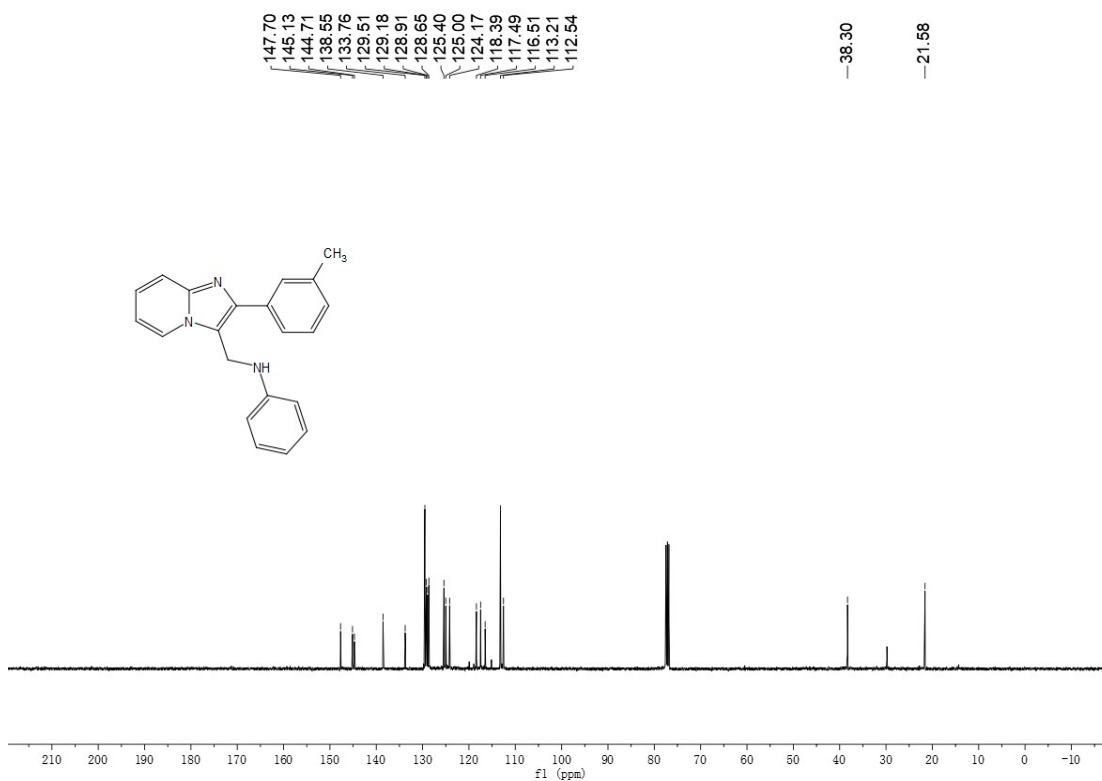

$^1\text{H}$  NMR and  $^{13}\text{C}$  NMR spectrum of compound **5g**

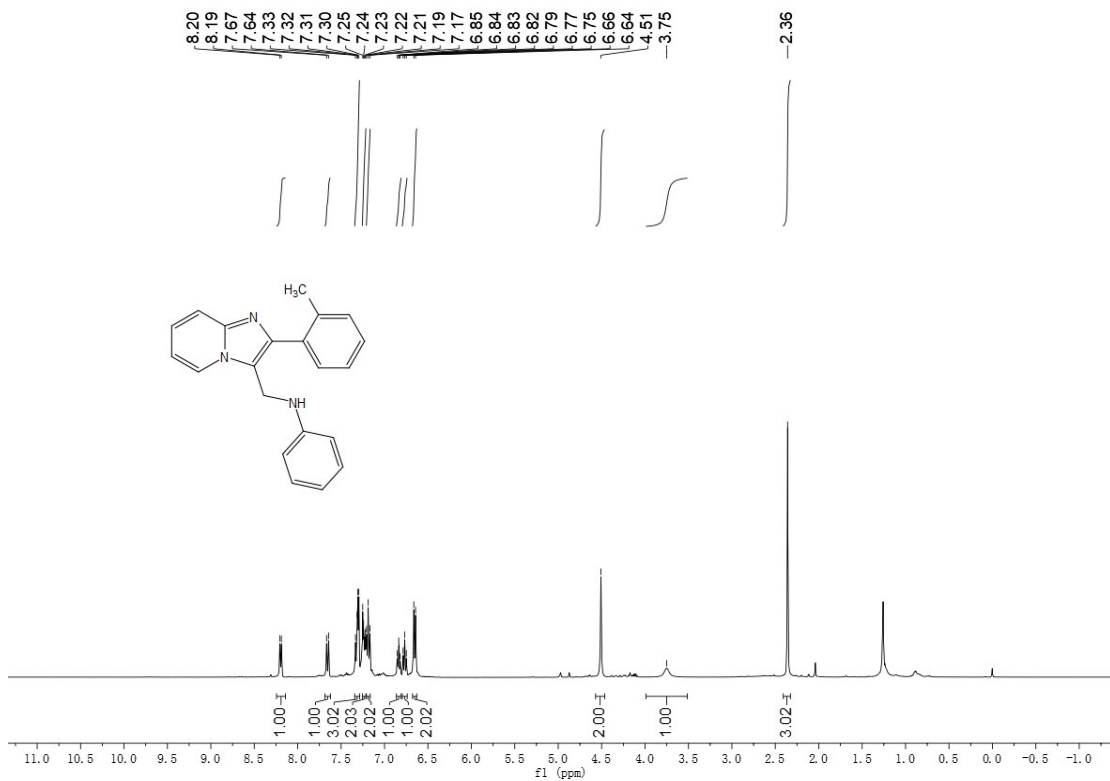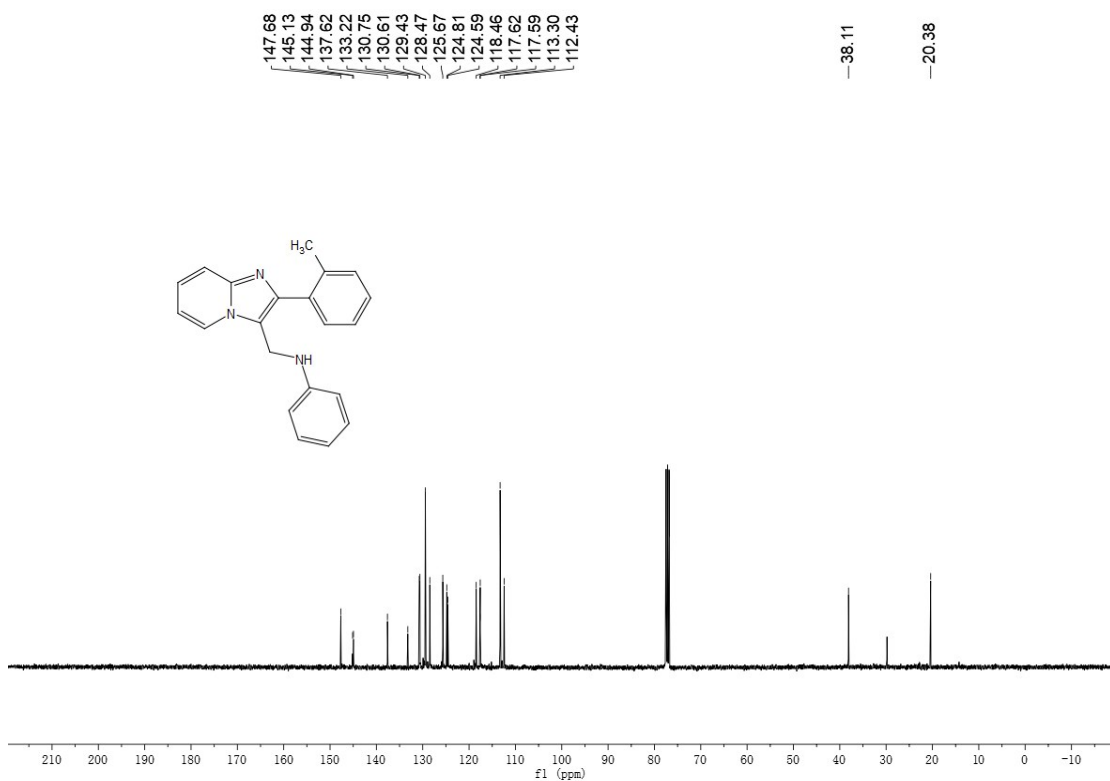

$^1\text{H}$  NMR and  $^{13}\text{C}$  NMR spectrum of compound **5h**

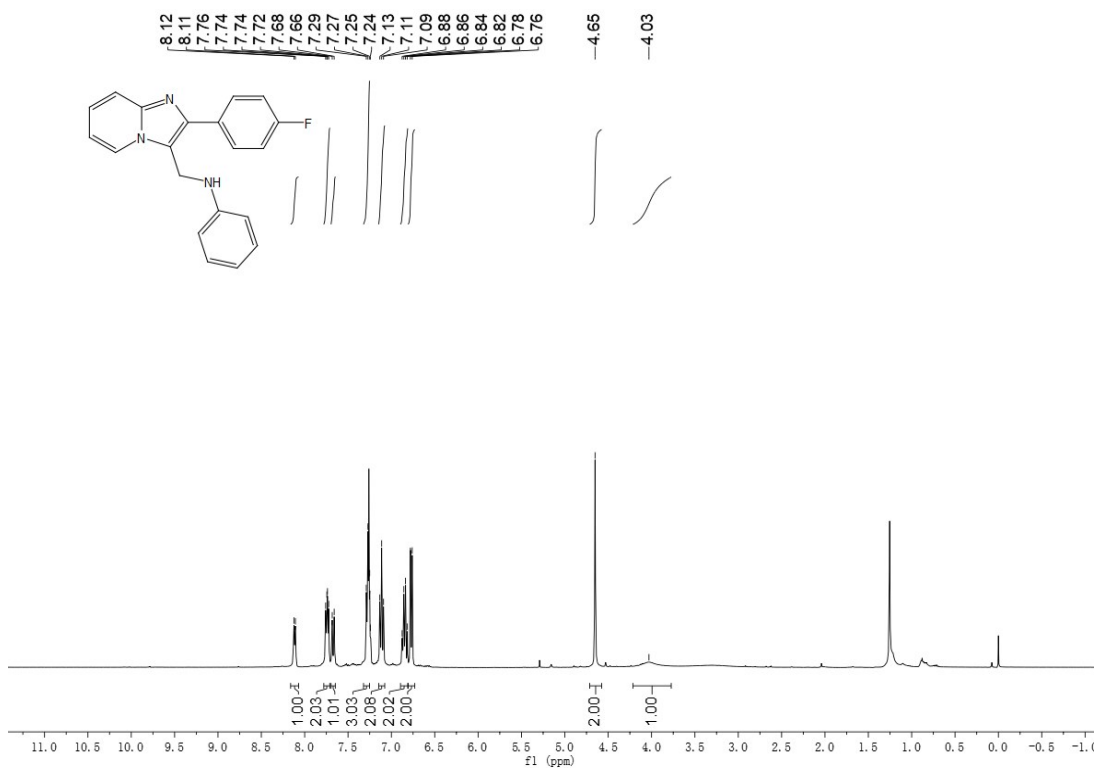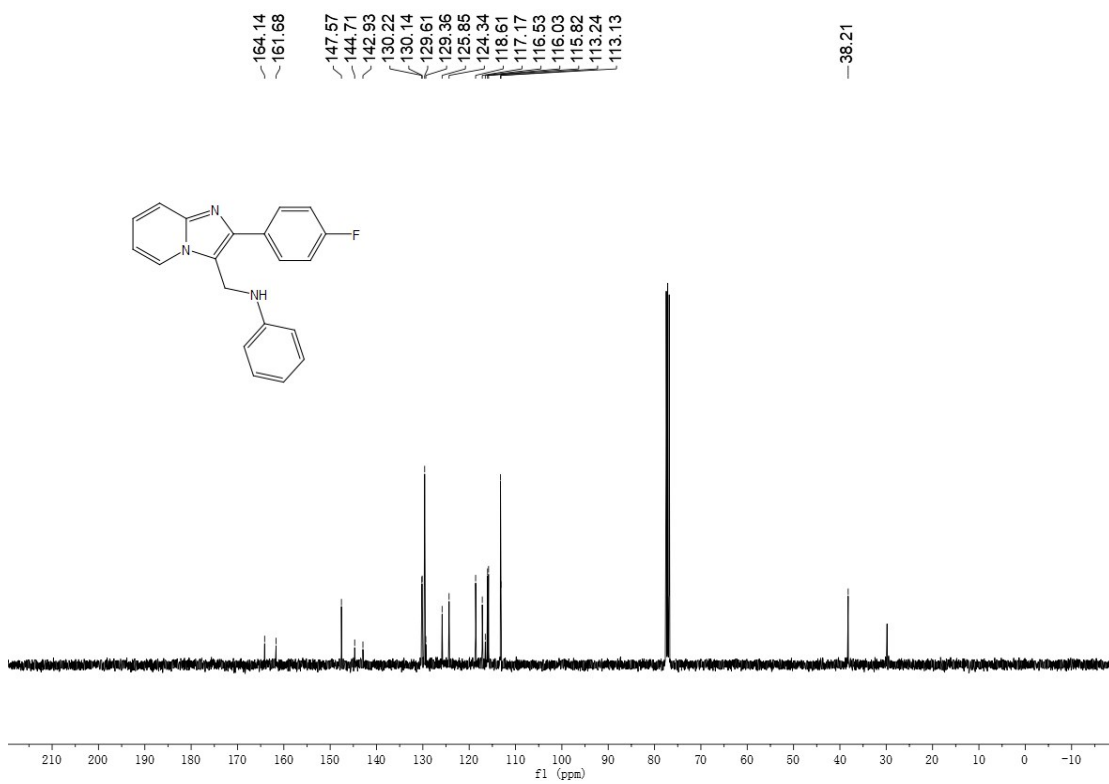

$^1\text{H}$  NMR and  $^{13}\text{C}$  NMR spectrum of compound **5i**

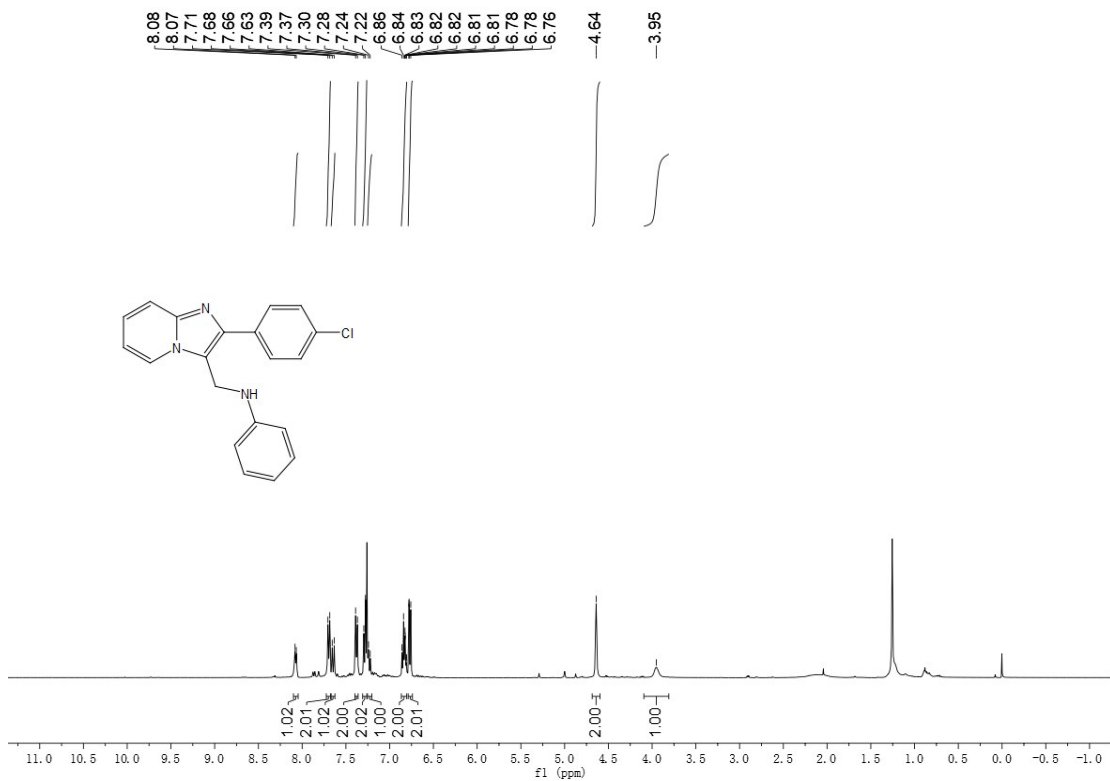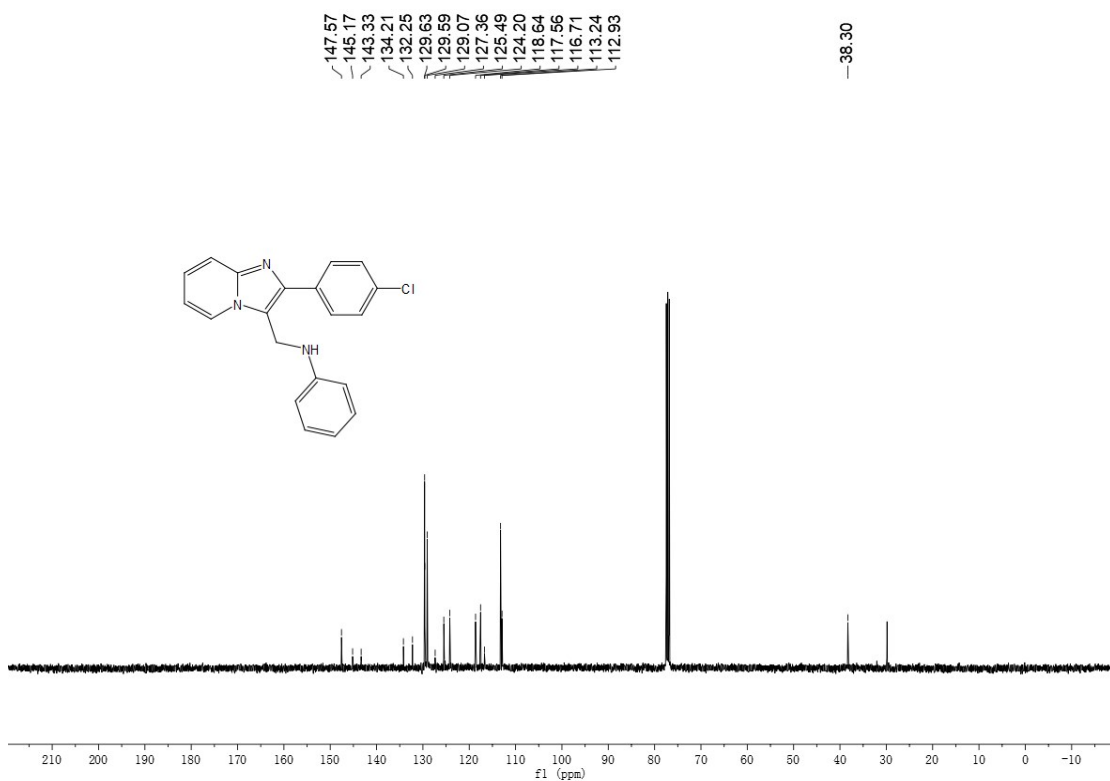

$^1\text{H}$  NMR and  $^{13}\text{C}$  NMR spectrum of compound **5j**

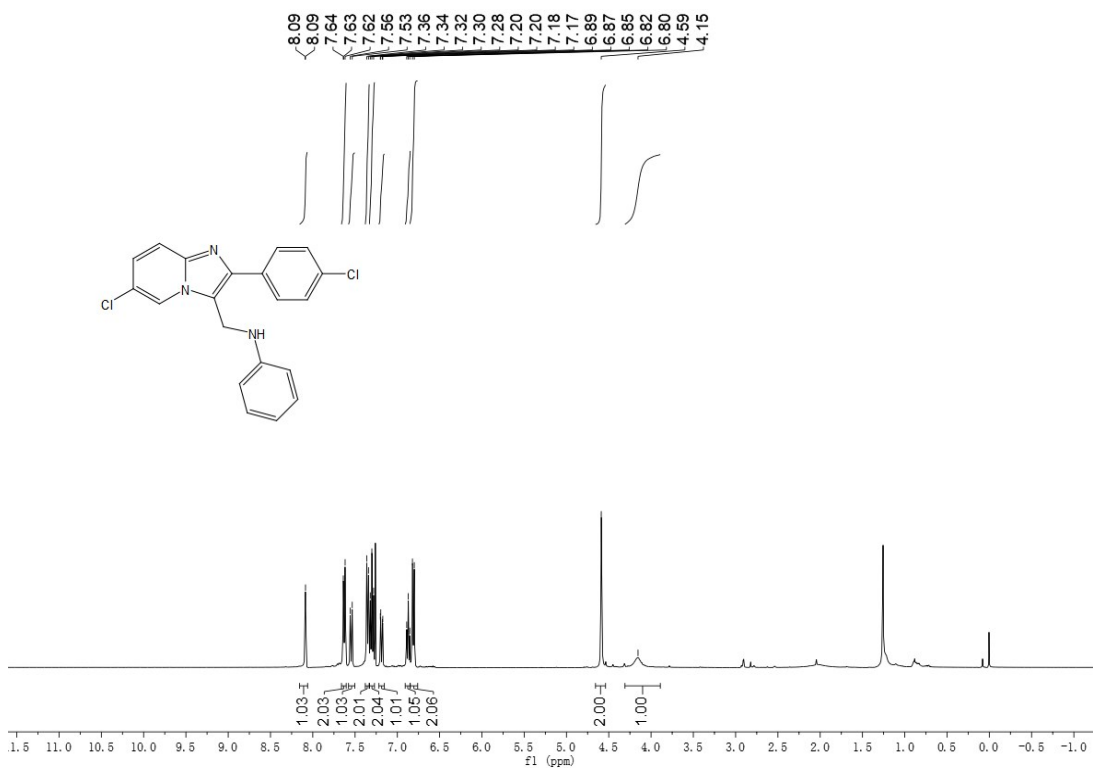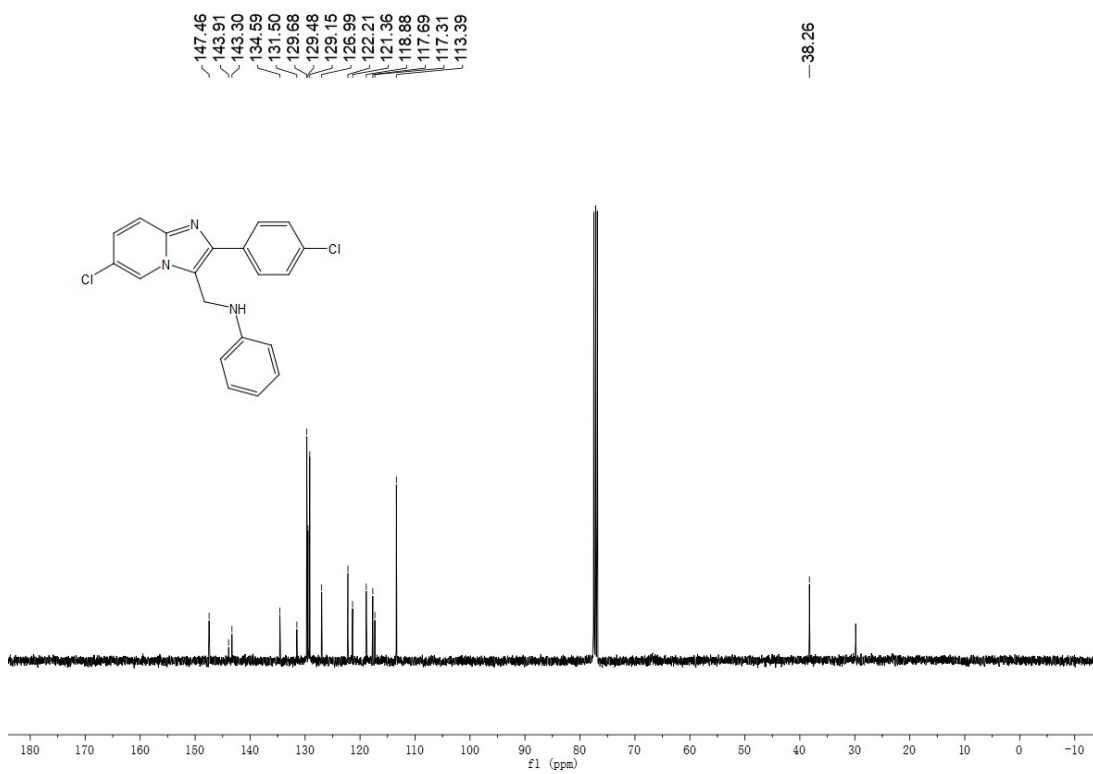



$^1\text{H}$  NMR and  $^{13}\text{C}$  NMR spectrum of compound **5k**

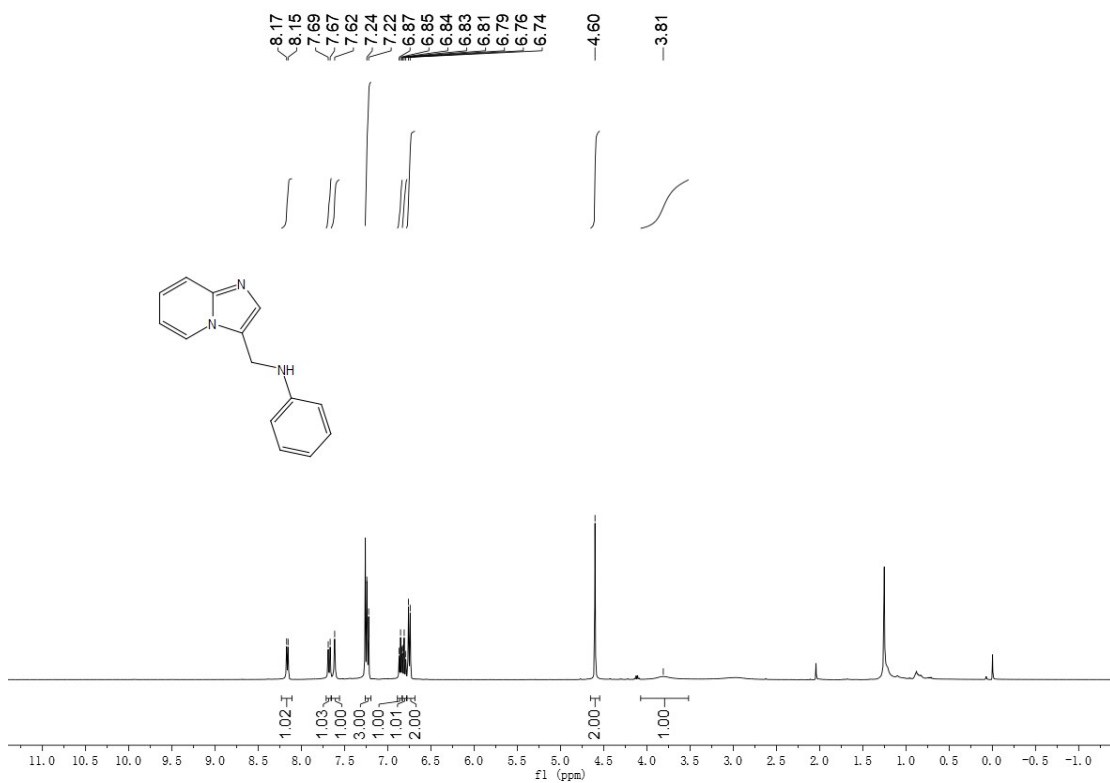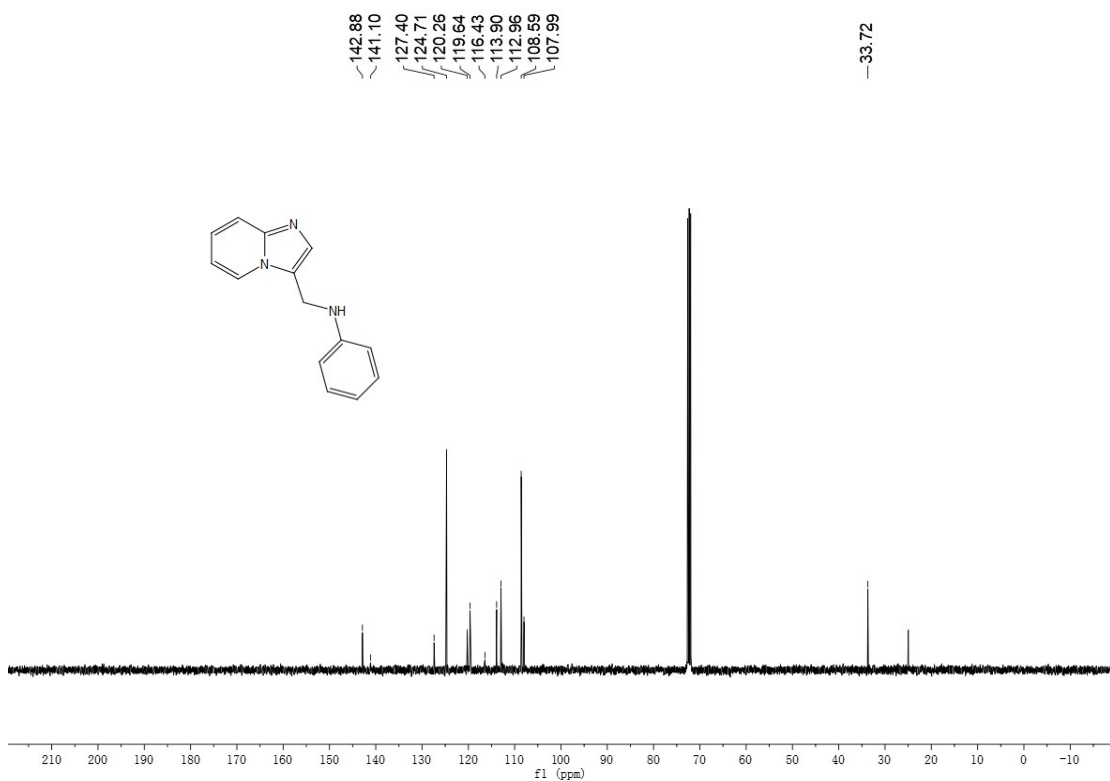

# <sup>1</sup>H NMR and <sup>13</sup>C NMR spectrum of compound **51**

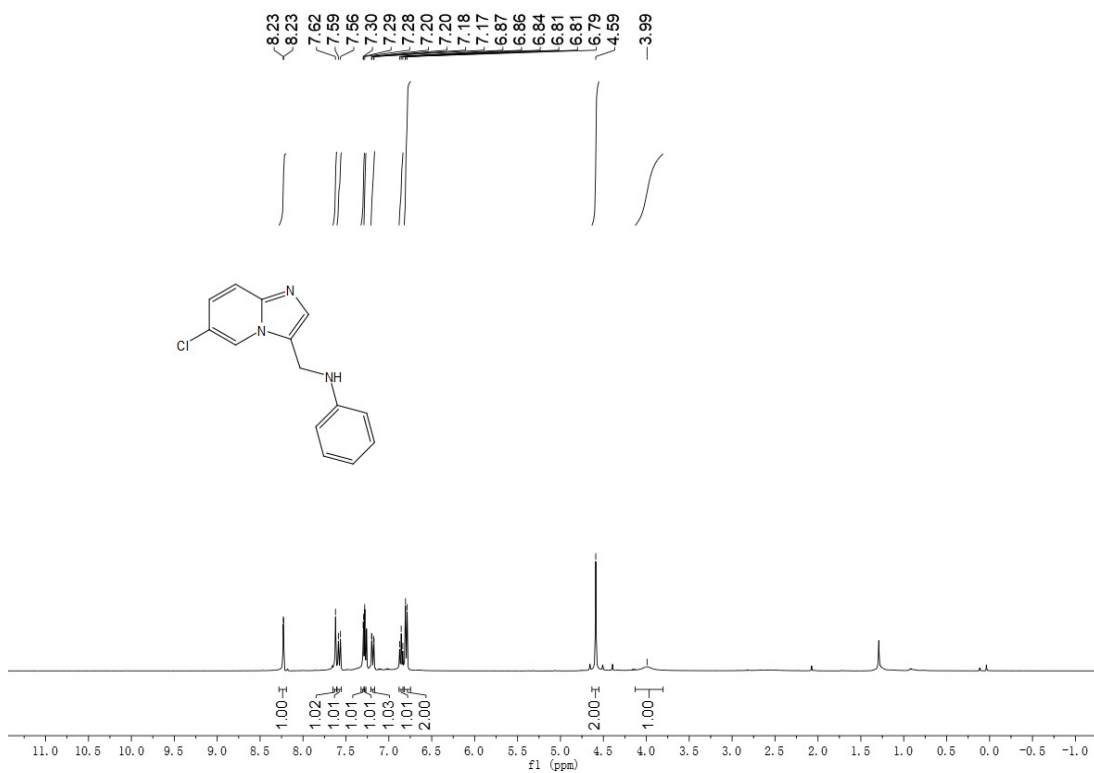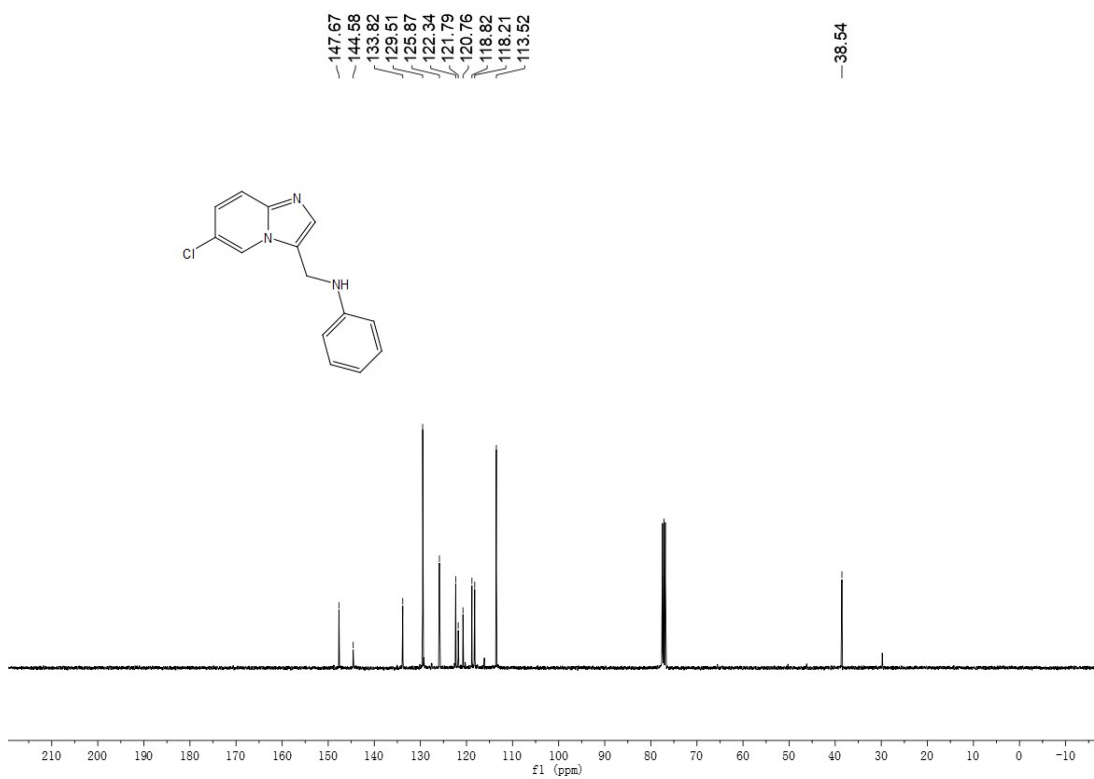

$^1\text{H}$  NMR and  $^{13}\text{C}$  NMR spectrum of compound **5m**

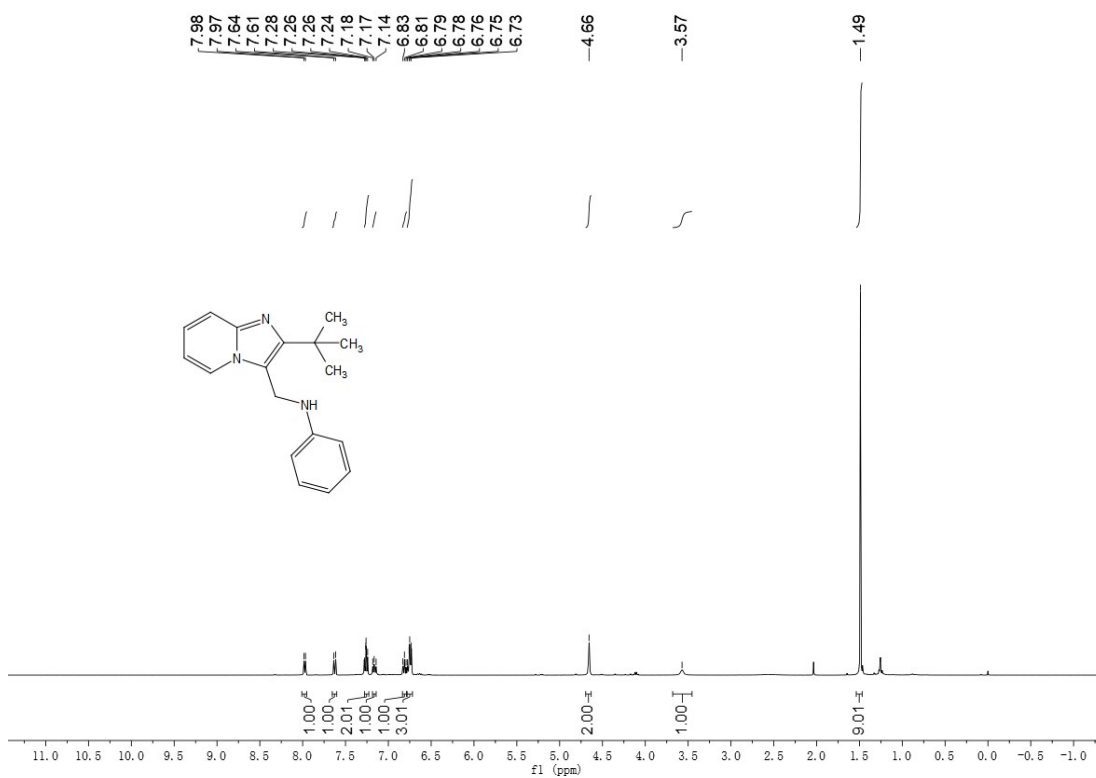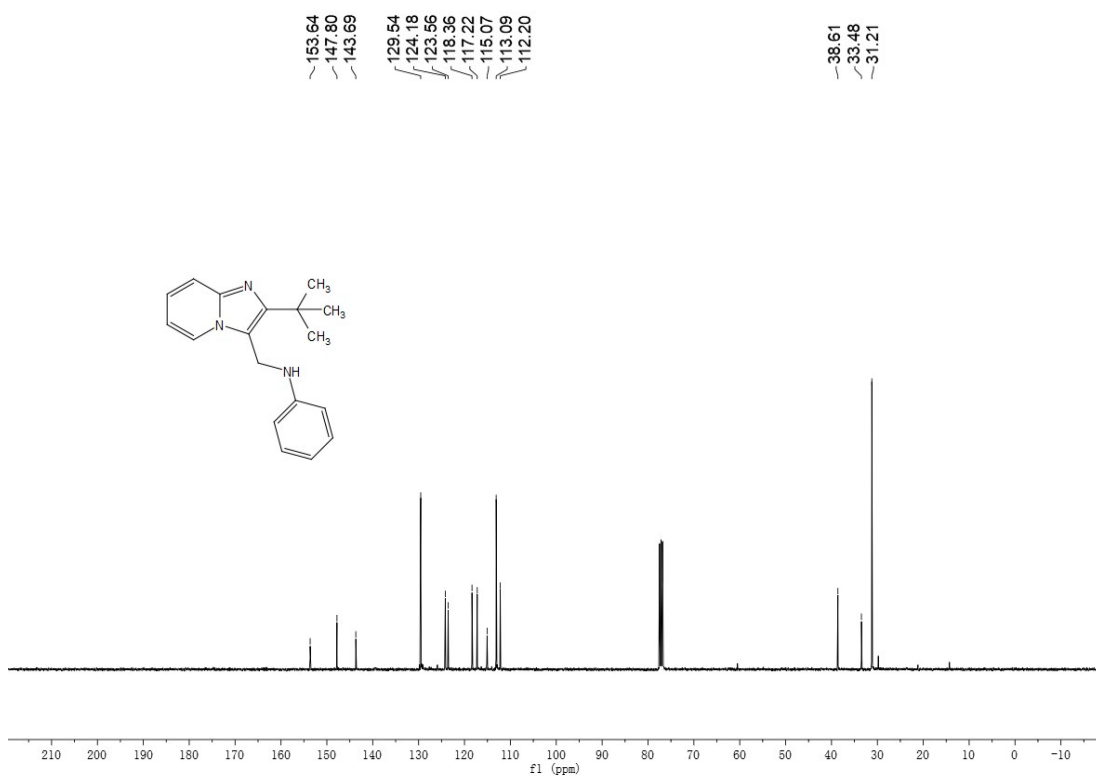

$^1\text{H}$  NMR and  $^{13}\text{C}$  NMR spectrum of compound **5n**

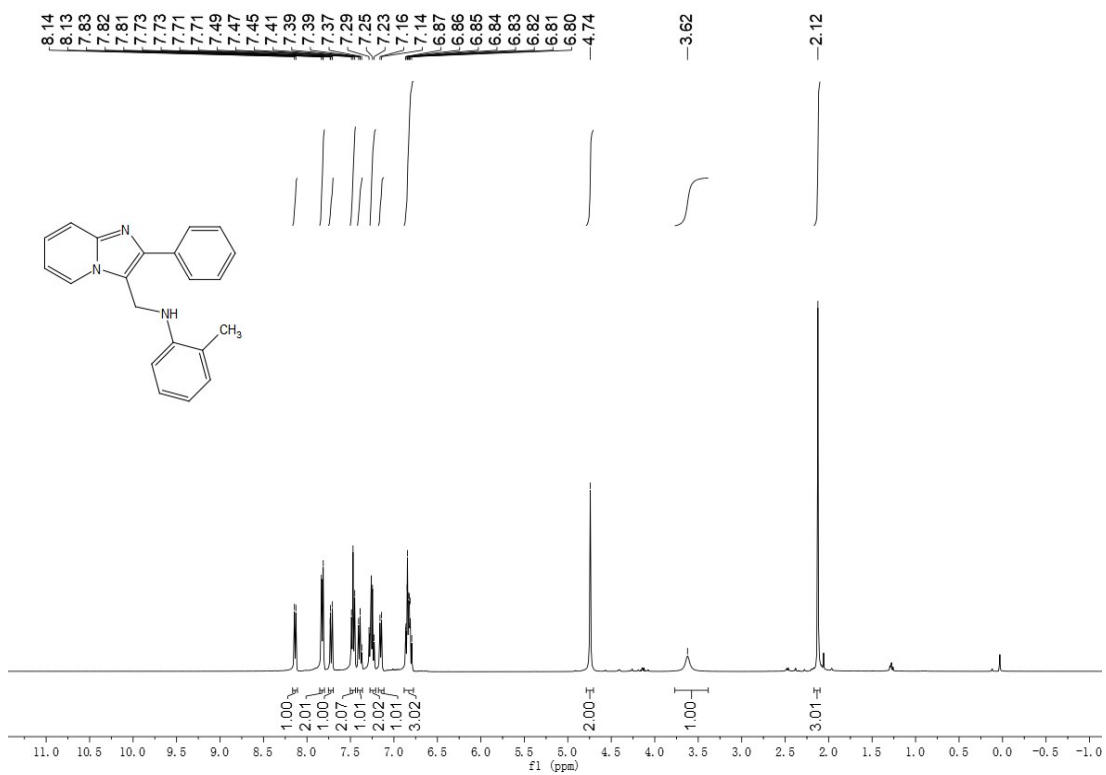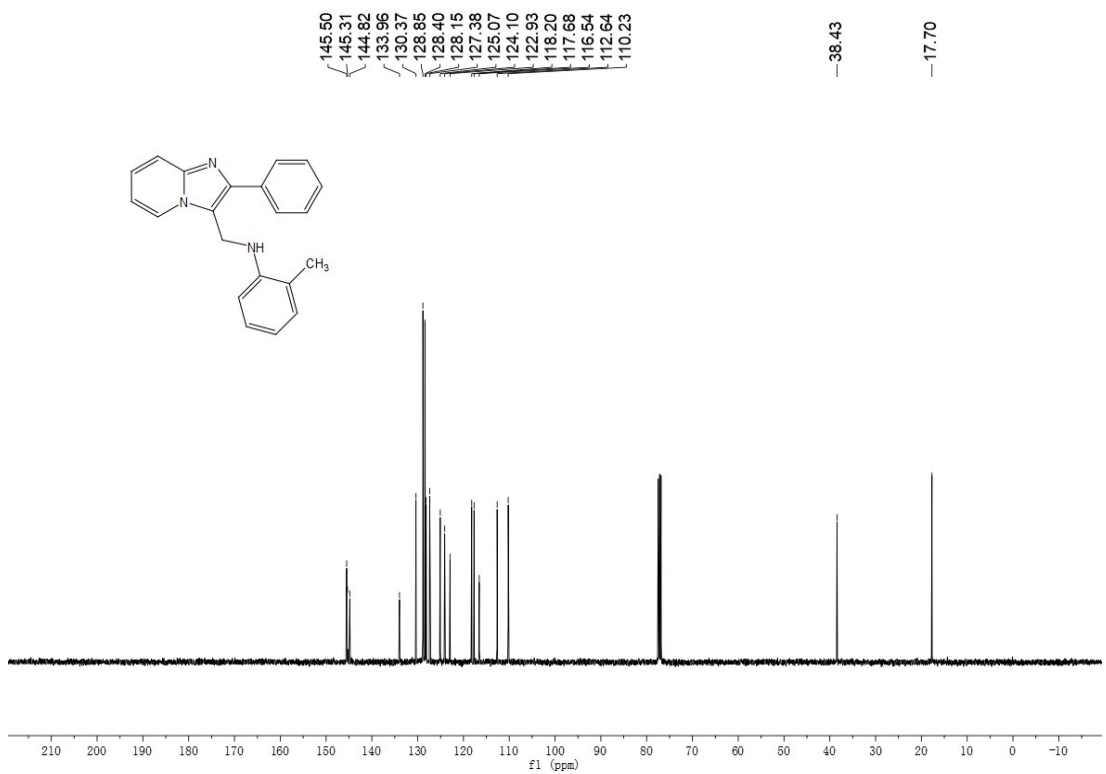

$^1\text{H}$  NMR and  $^{13}\text{C}$  NMR spectrum of compound **50**

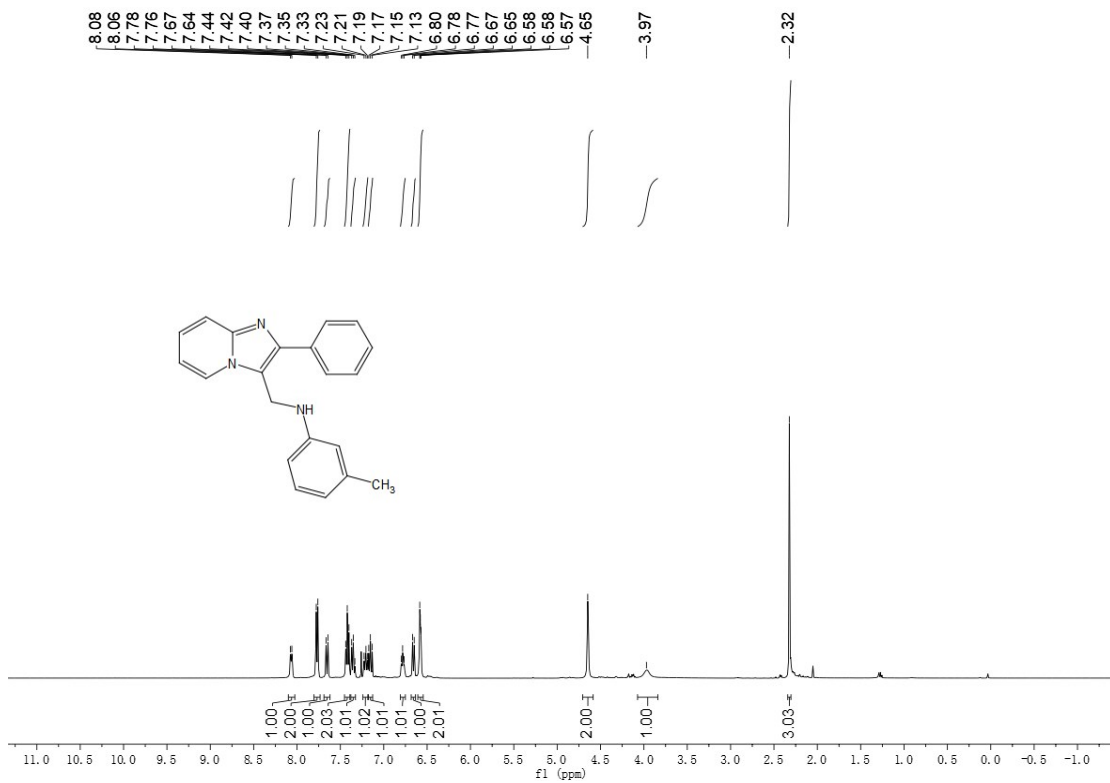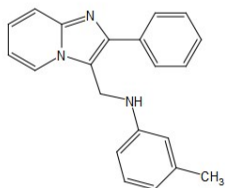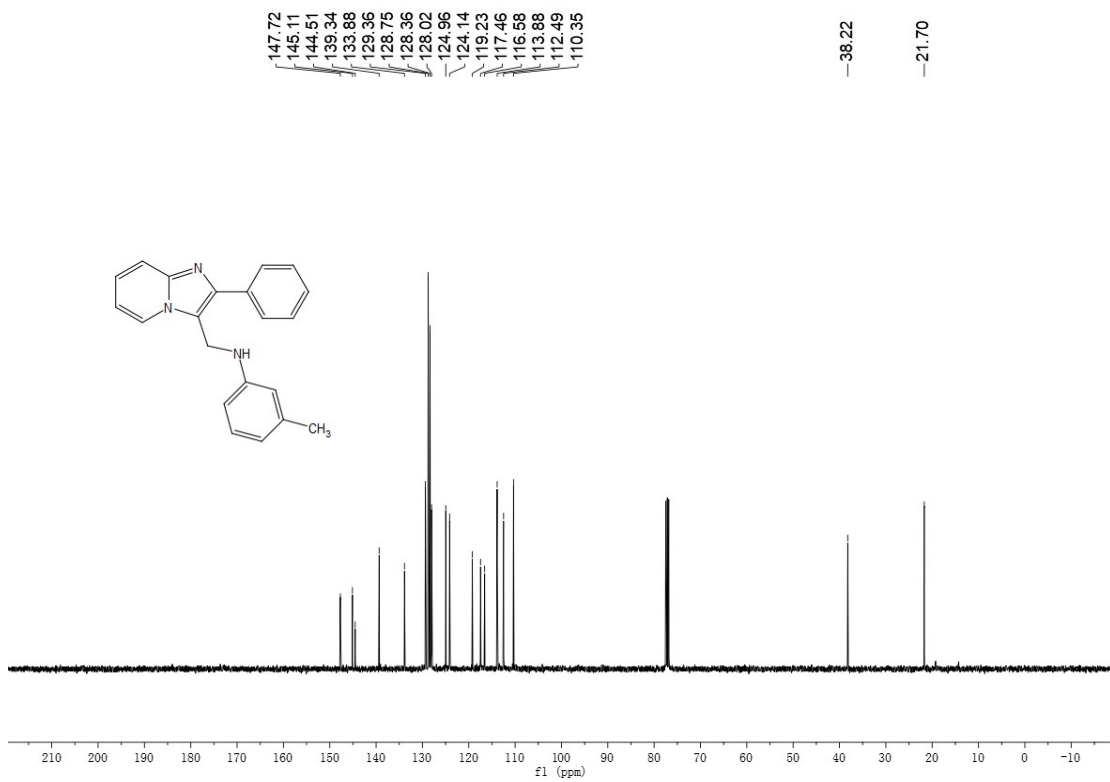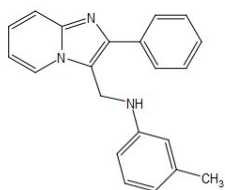

$^1\text{H}$  NMR and  $^{13}\text{C}$  NMR spectrum of compound **5p**

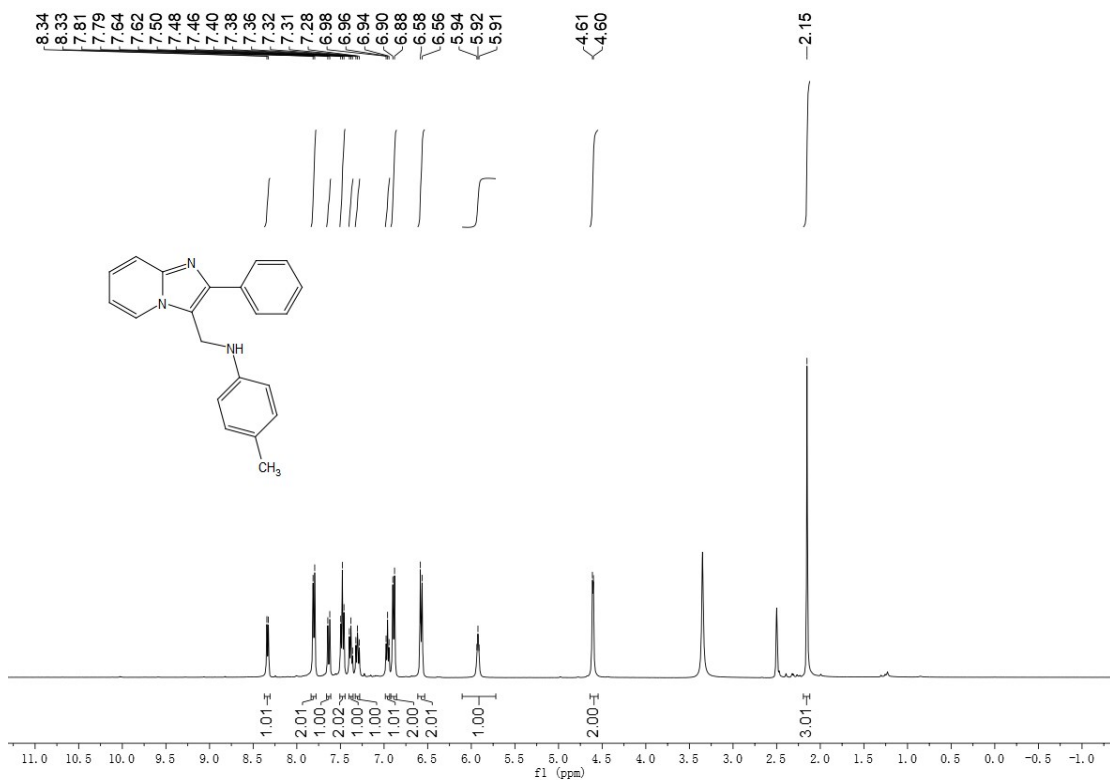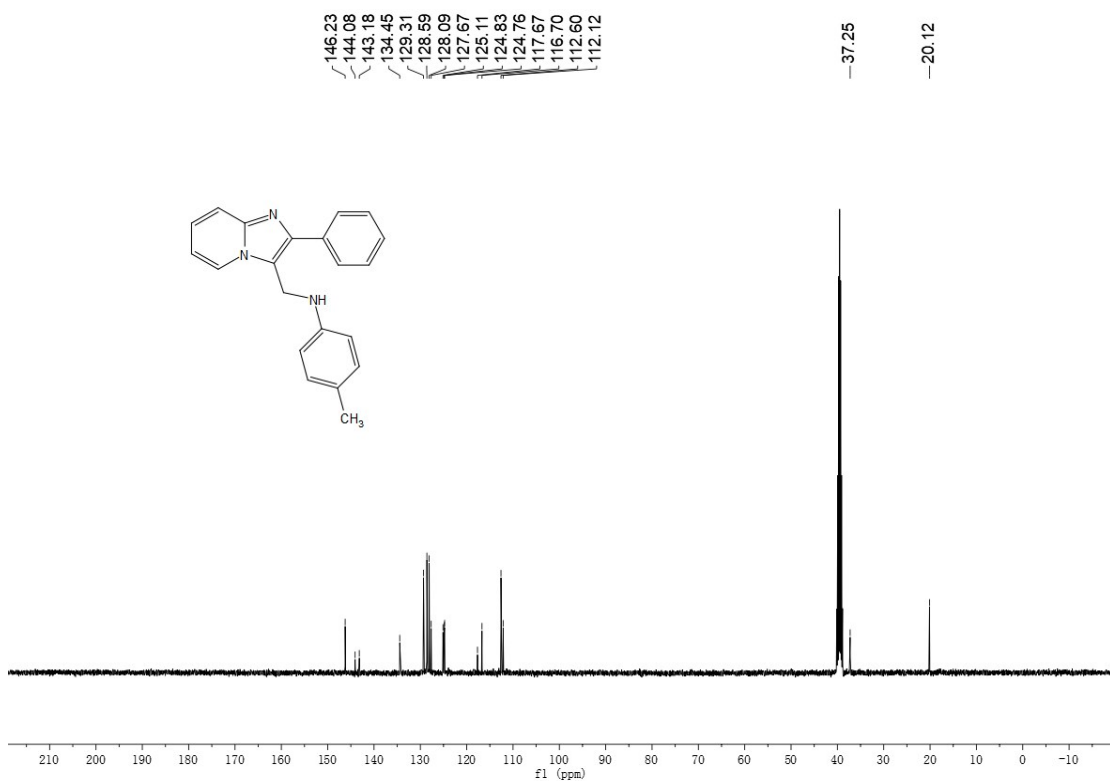

$^1\text{H}$  NMR and  $^{13}\text{C}$  NMR spectrum of compound **5q**

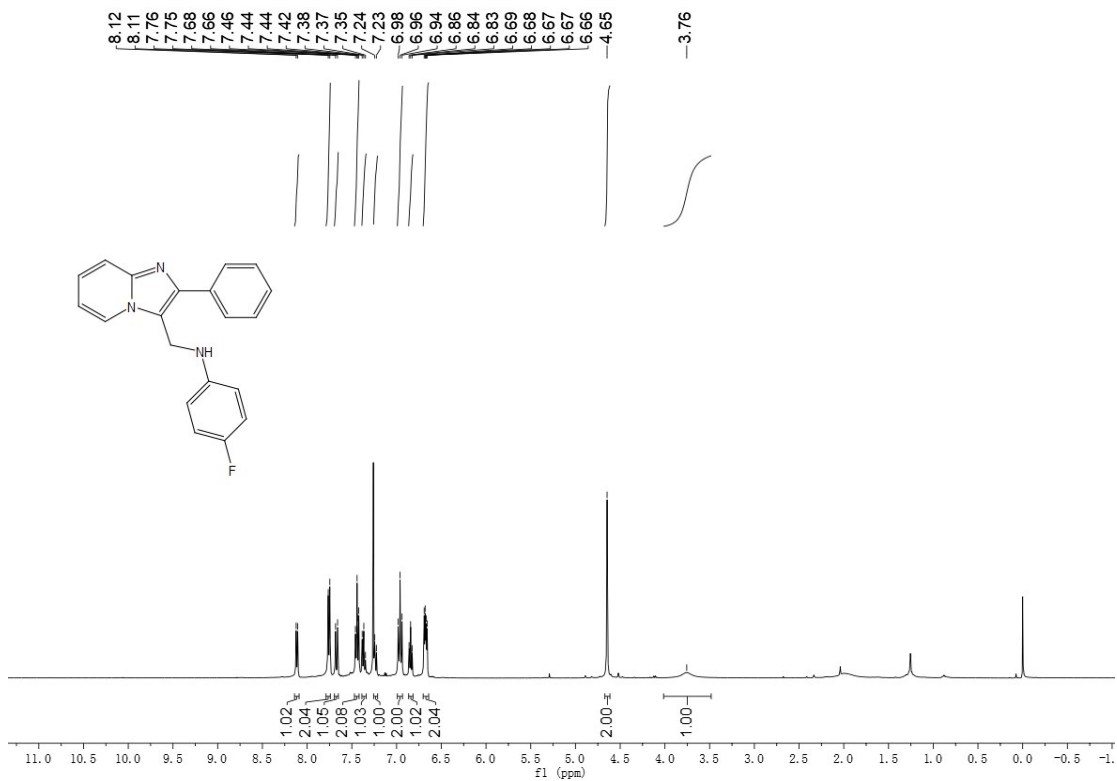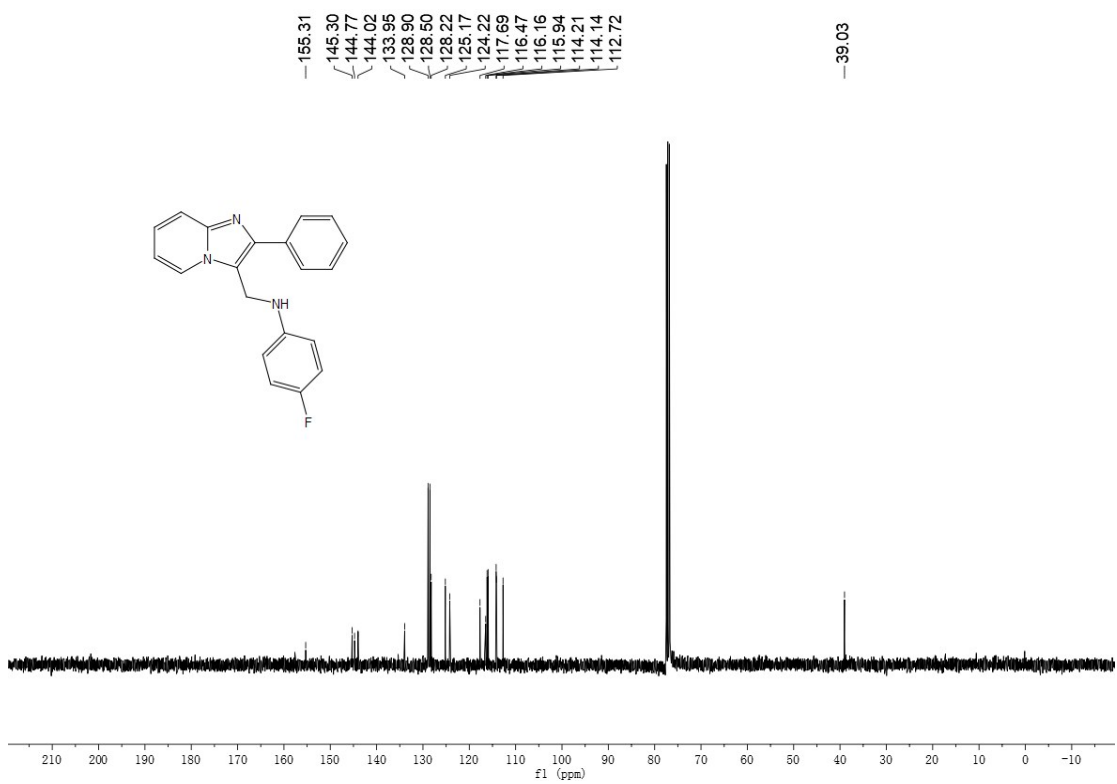

$^1\text{H}$  NMR and  $^{13}\text{C}$  NMR spectrum of compound **5r**

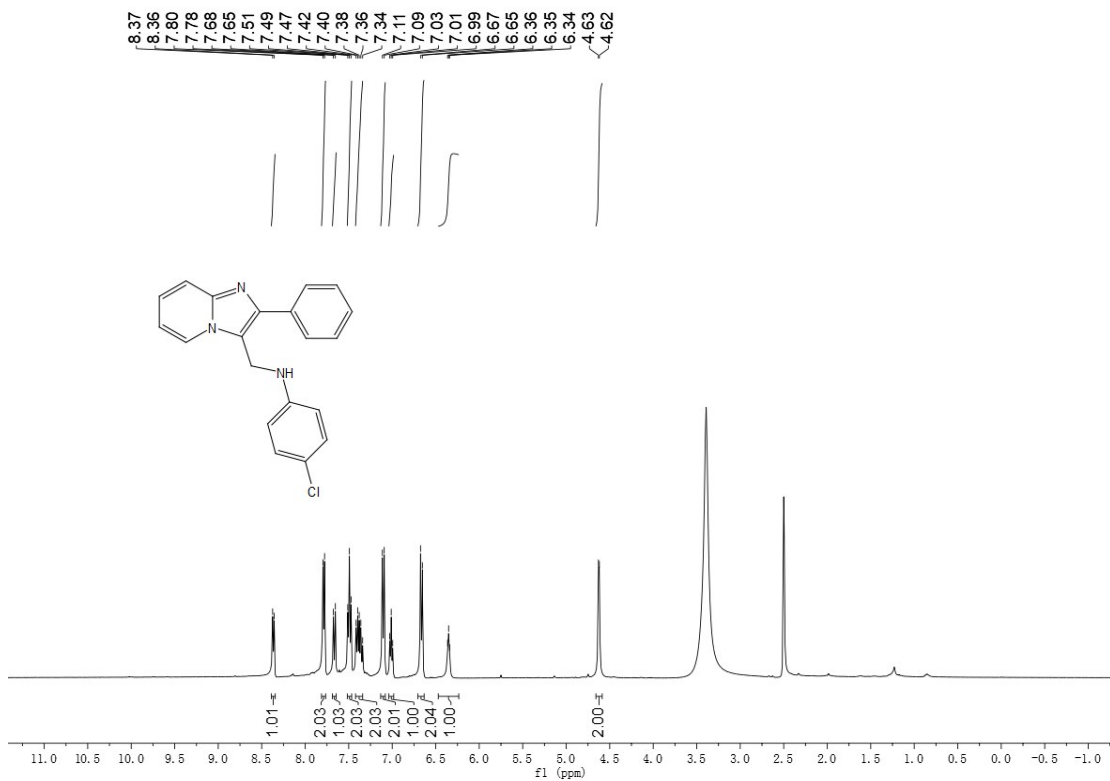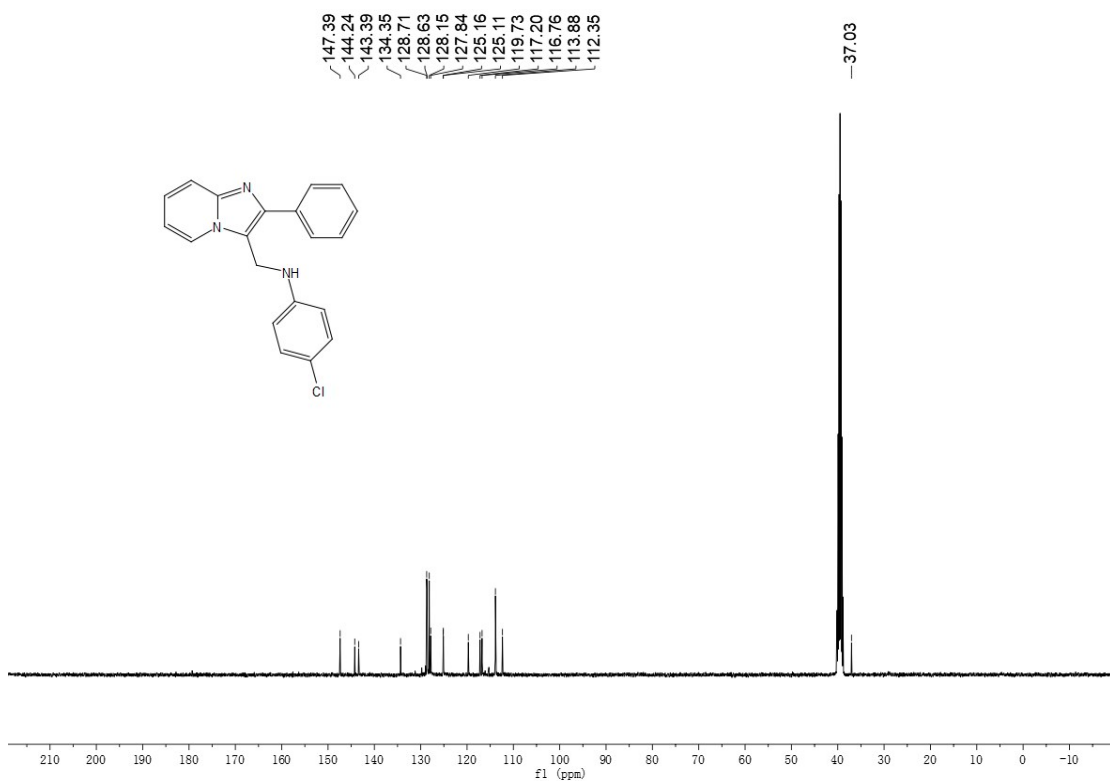



# $^1\text{H}$ NMR and $^{13}\text{C}$ NMR spectrum of compound **5s**

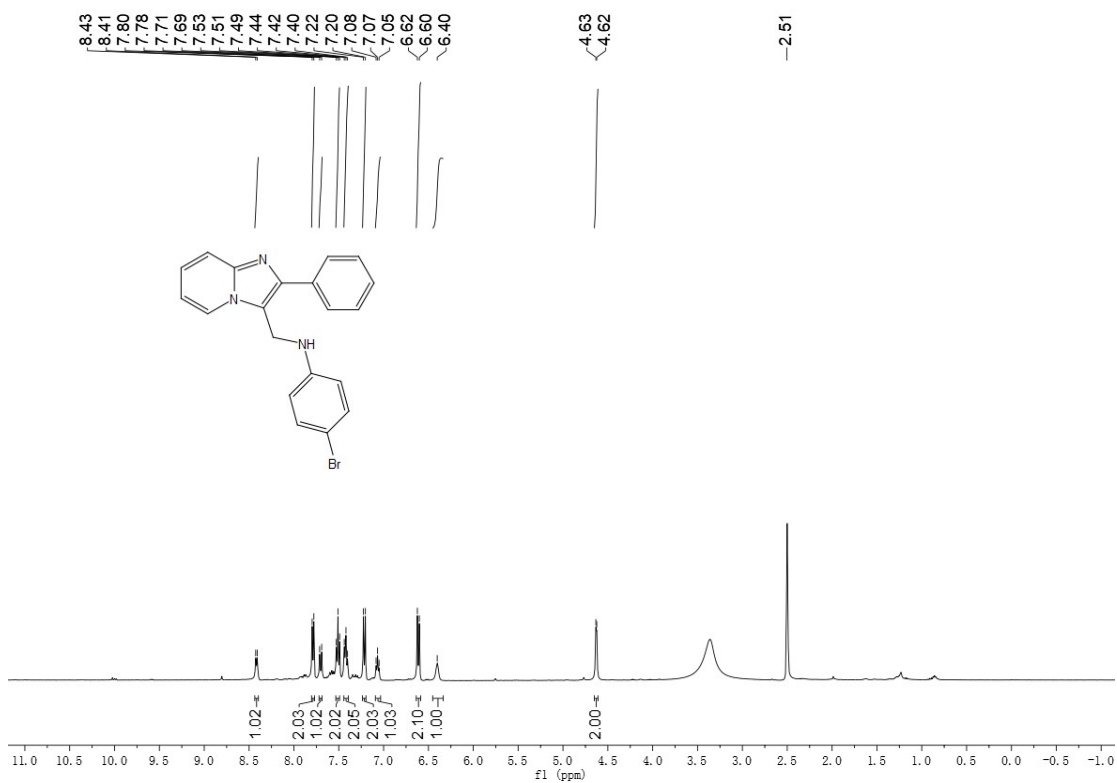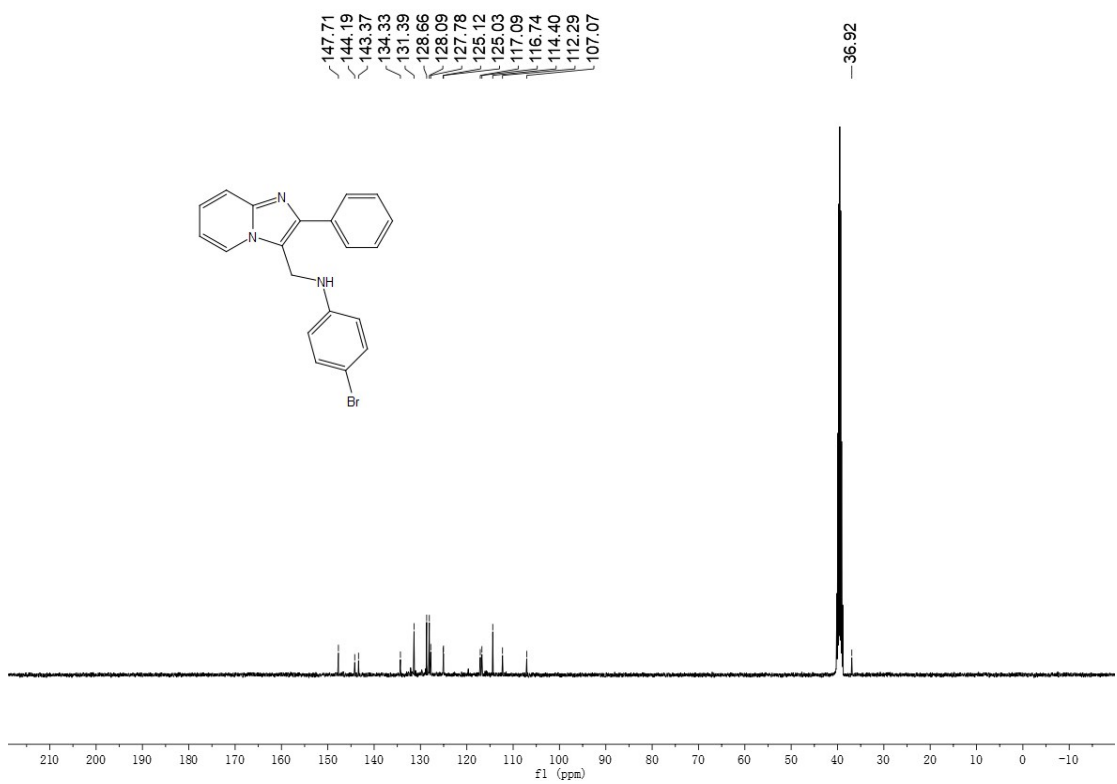

<sup>1</sup>H NMR and <sup>13</sup>C NMR spectrum of compound **5t**

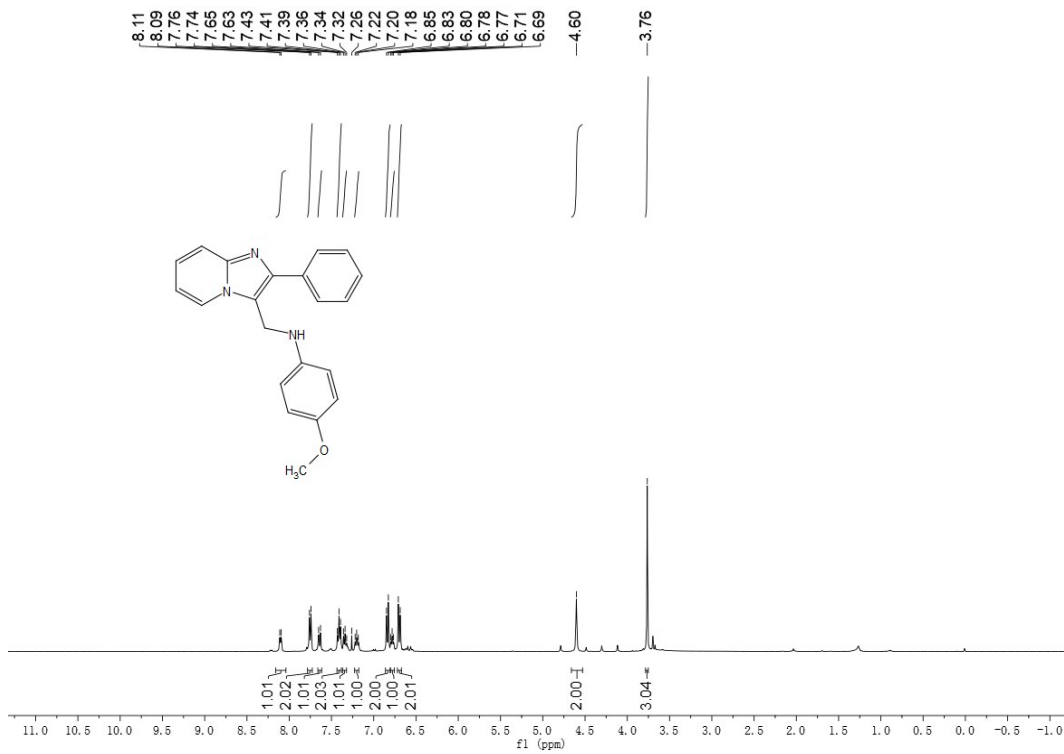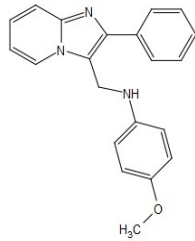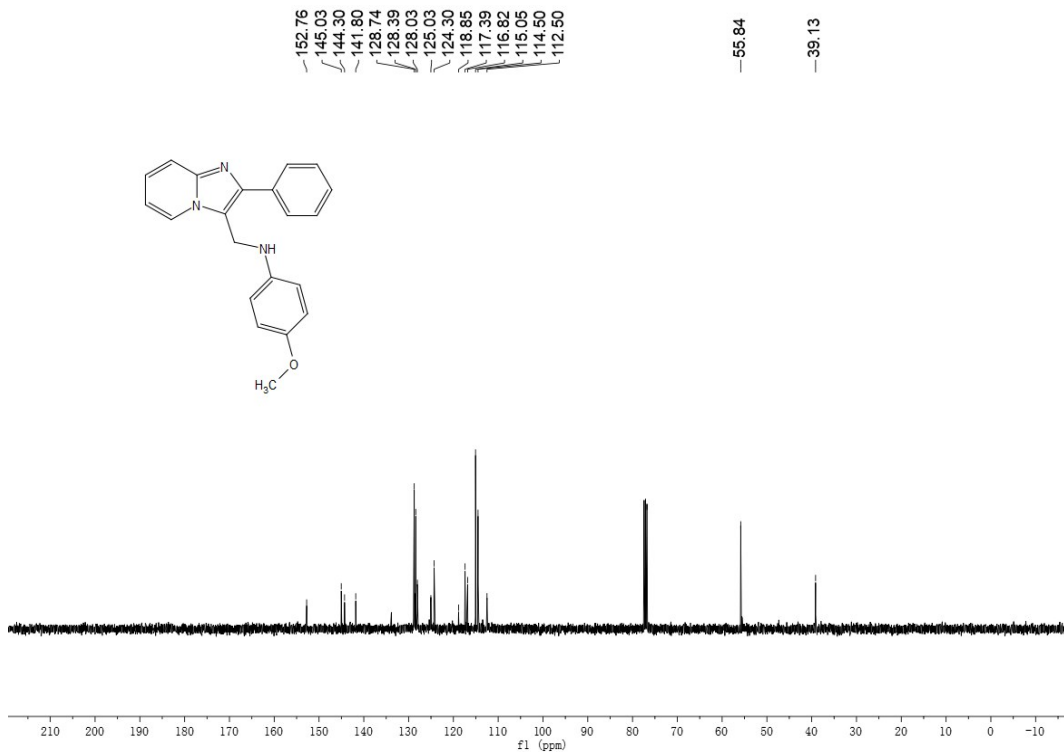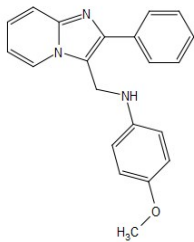

$^1\text{H}$  NMR and  $^{13}\text{C}$  NMR spectrum of compound **5u**

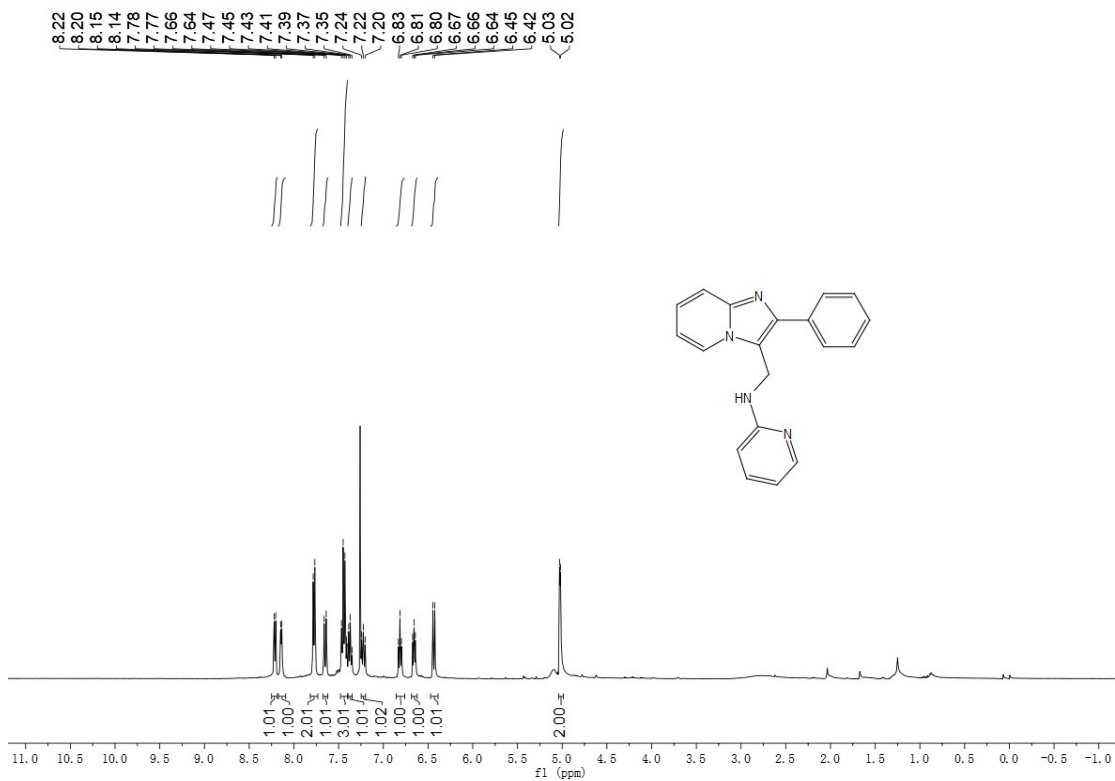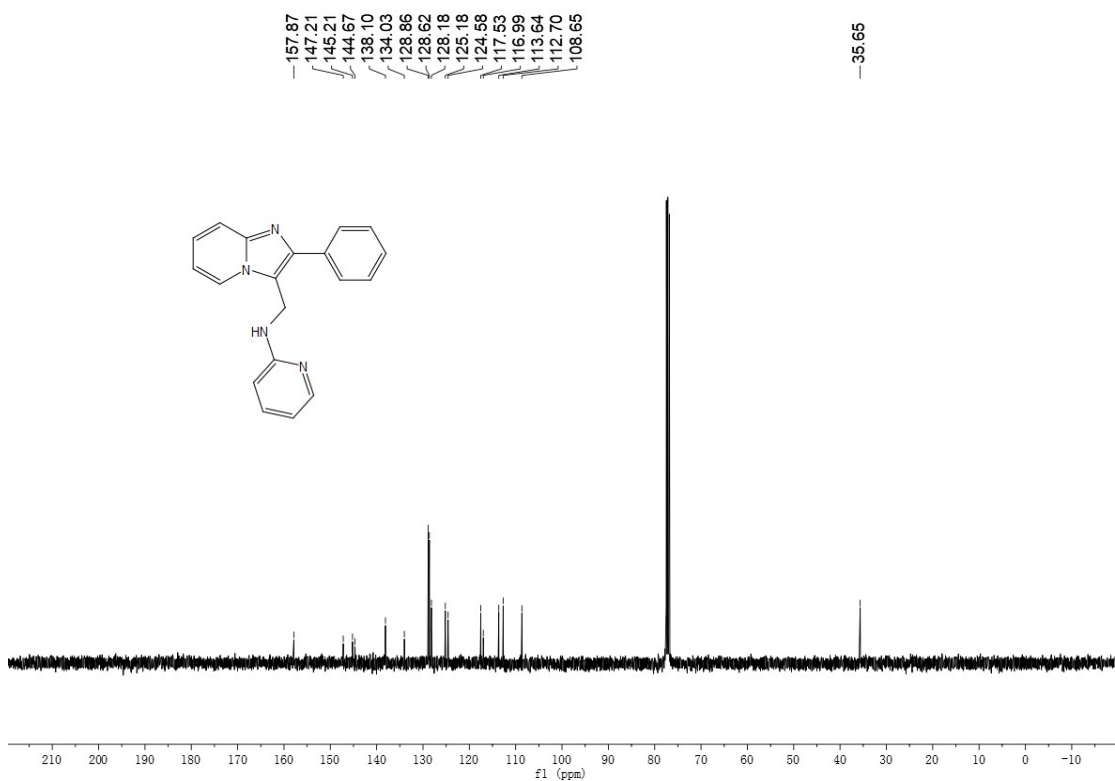

$^1\text{H}$  NMR and  $^{13}\text{C}$  NMR spectrum of compound **7a**

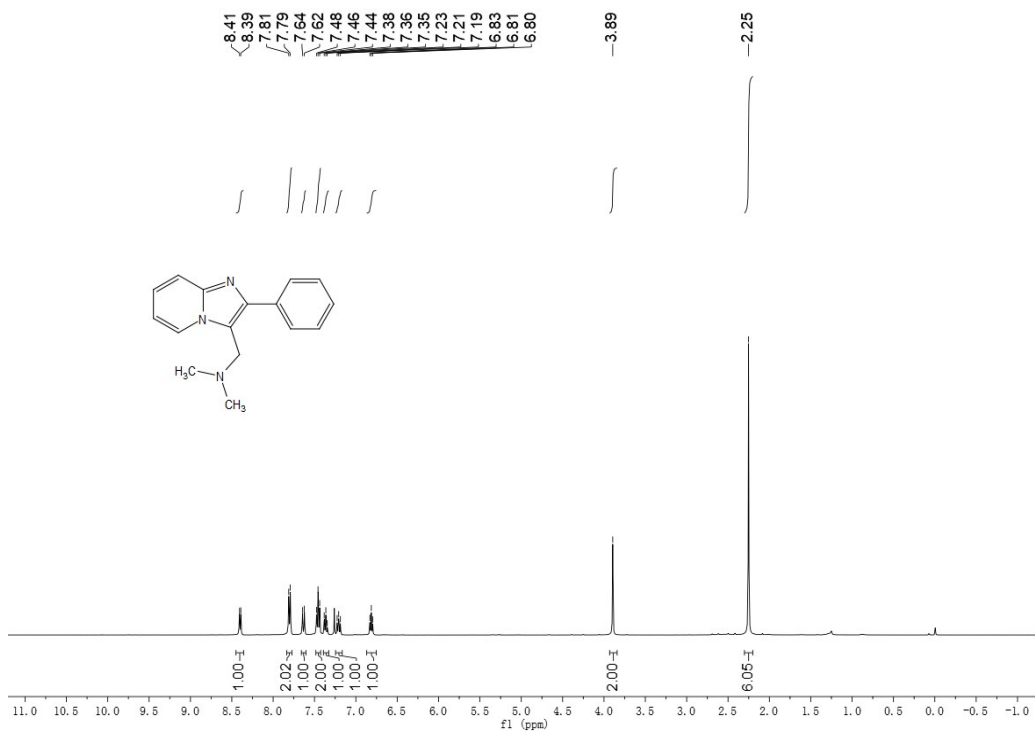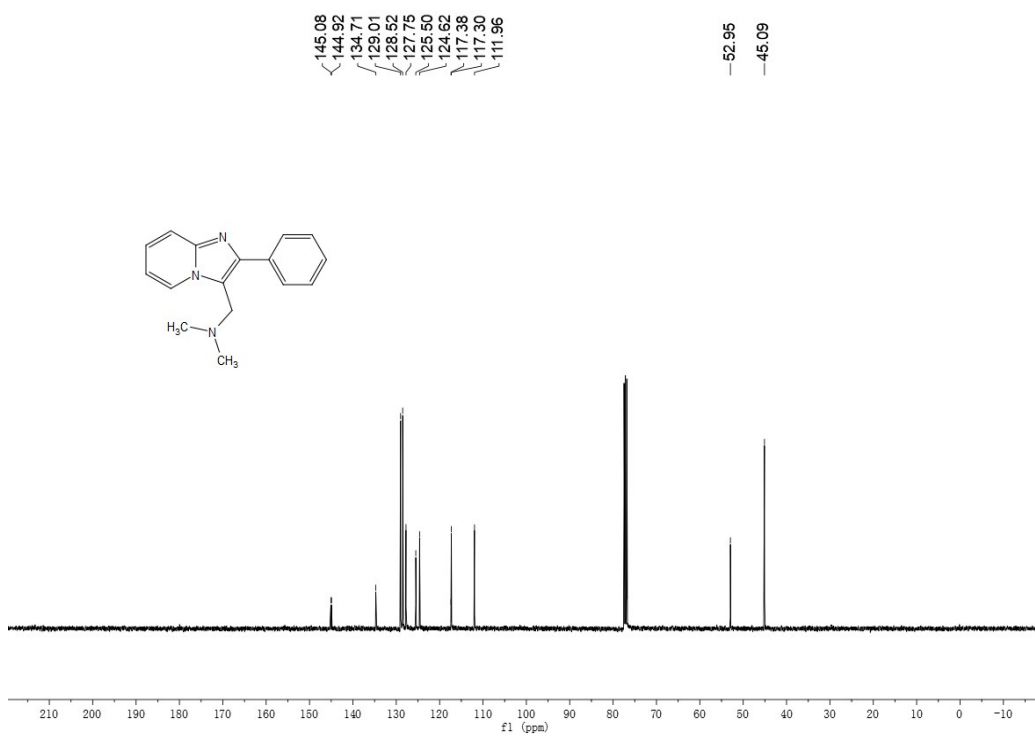

$^1\text{H}$  NMR and  $^{13}\text{C}$  NMR spectrum of compound **7b**

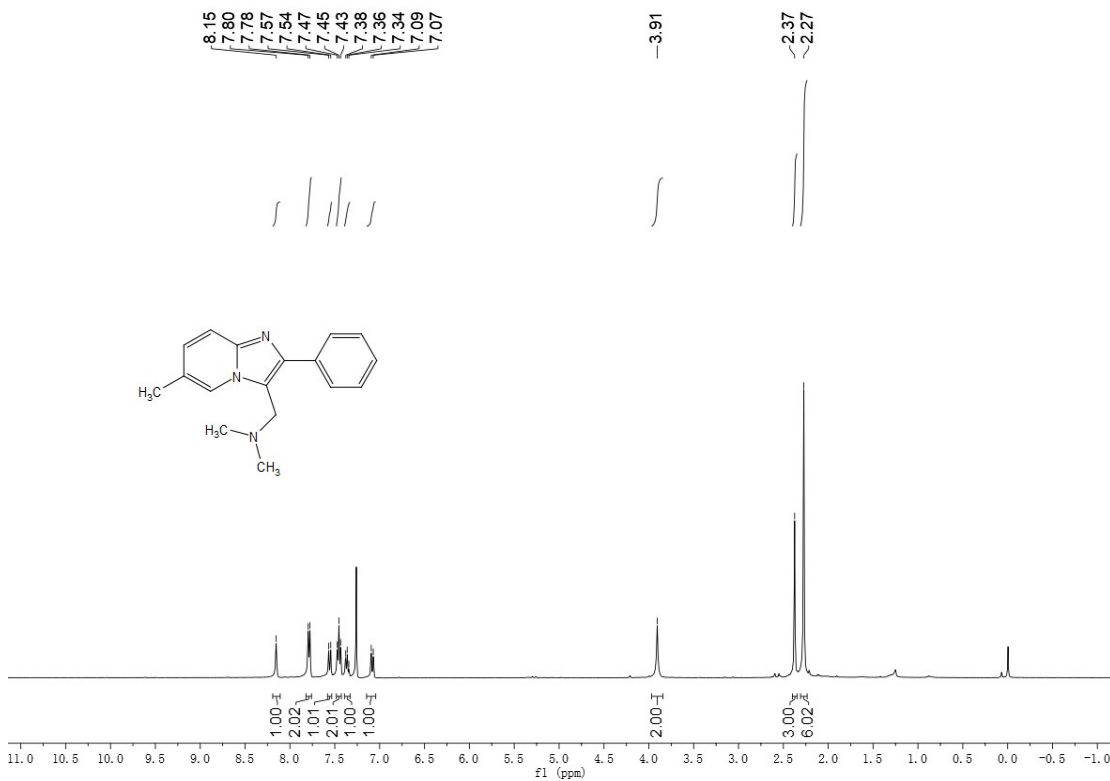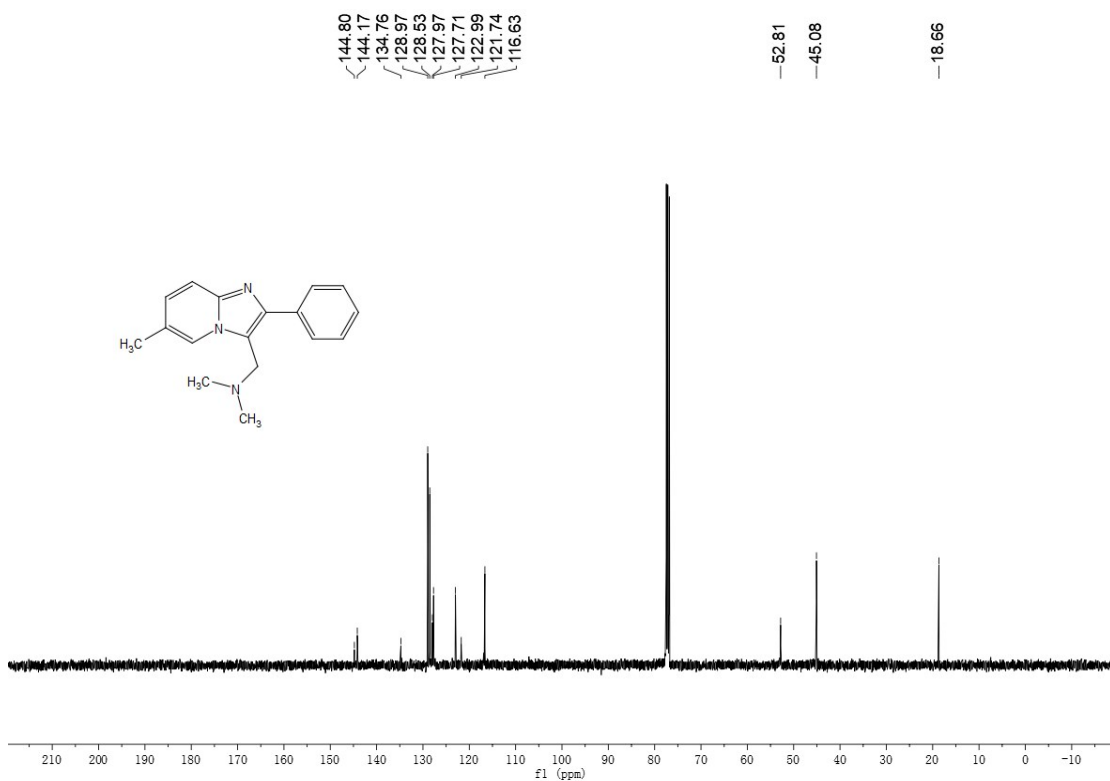

$^1\text{H}$  NMR and  $^{13}\text{C}$  NMR spectrum of compound **7c**

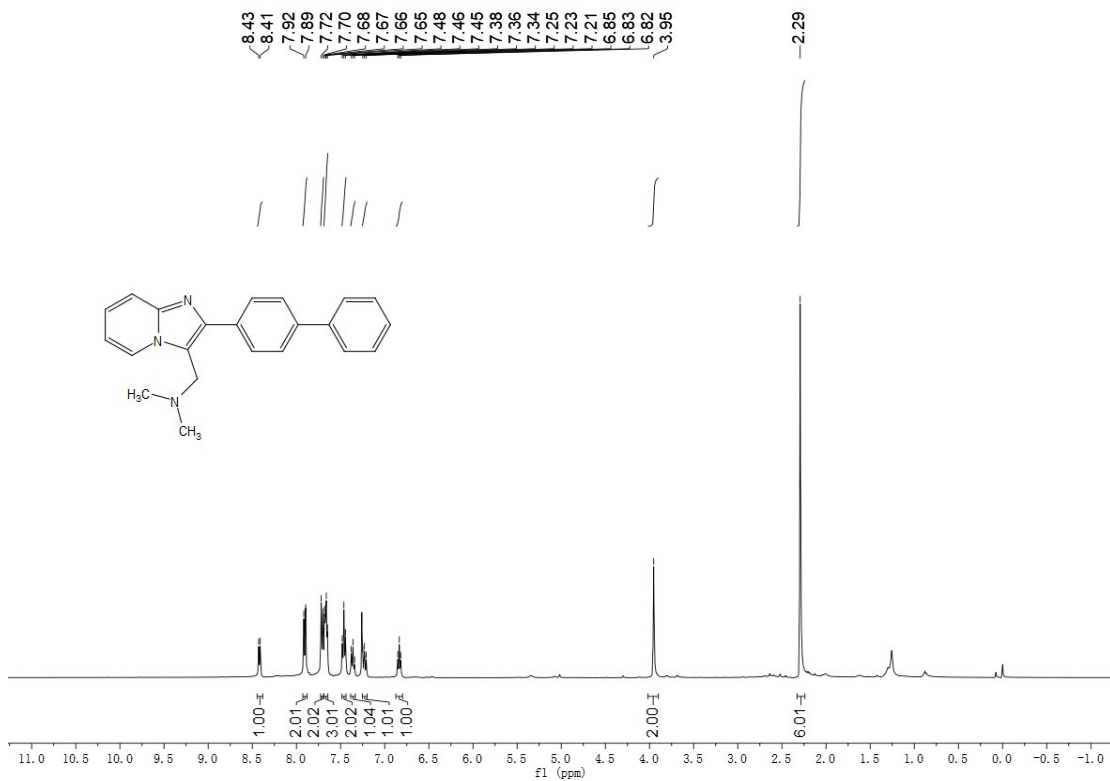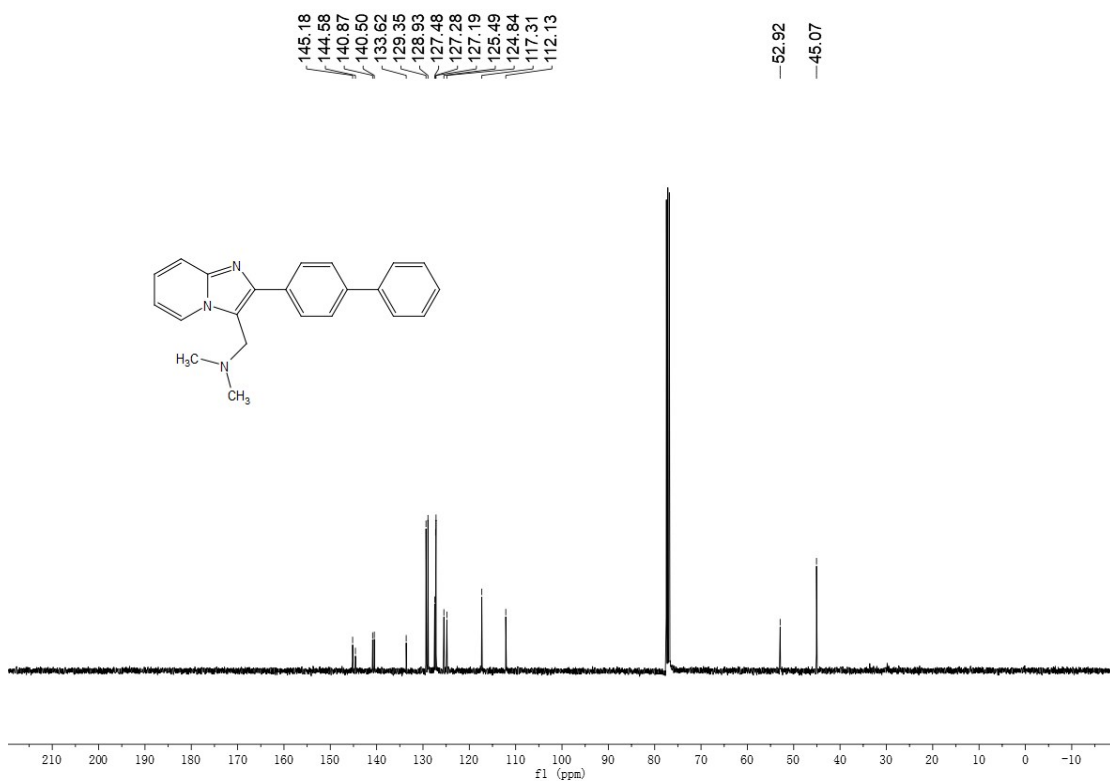

$^1\text{H}$  NMR and  $^{13}\text{C}$  NMR spectrum of compound **7d**

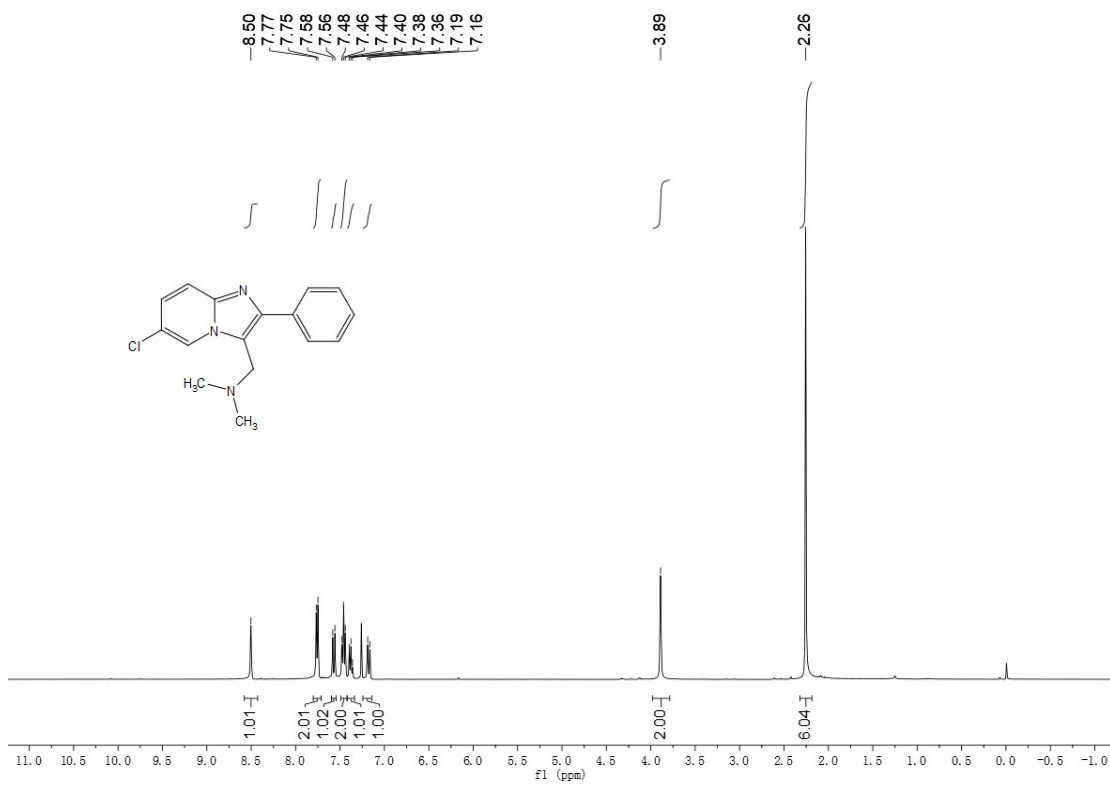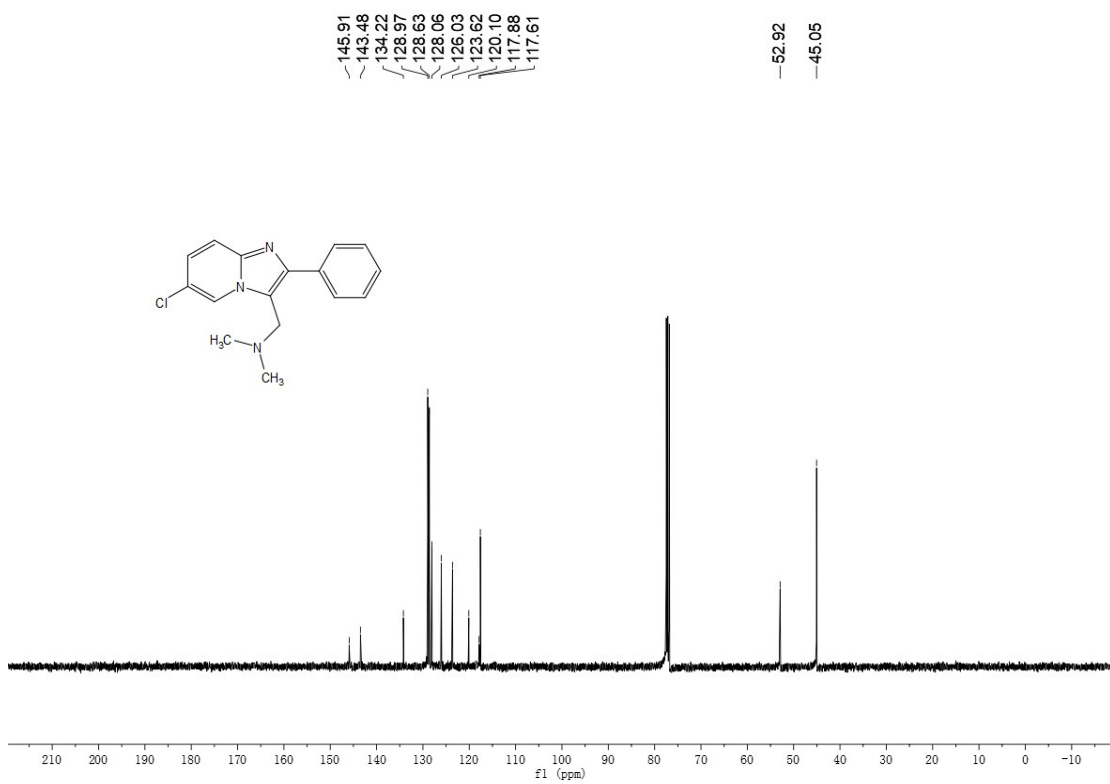

$^1\text{H}$  NMR and  $^{13}\text{C}$  NMR spectrum of compound **7e**

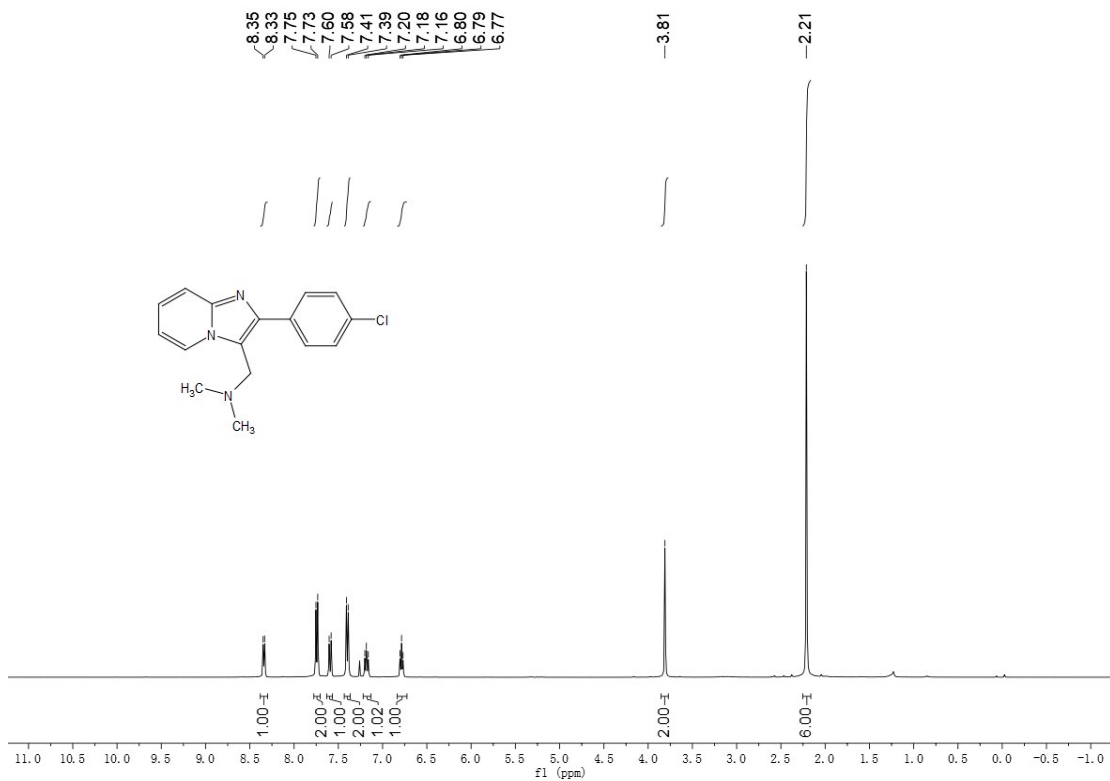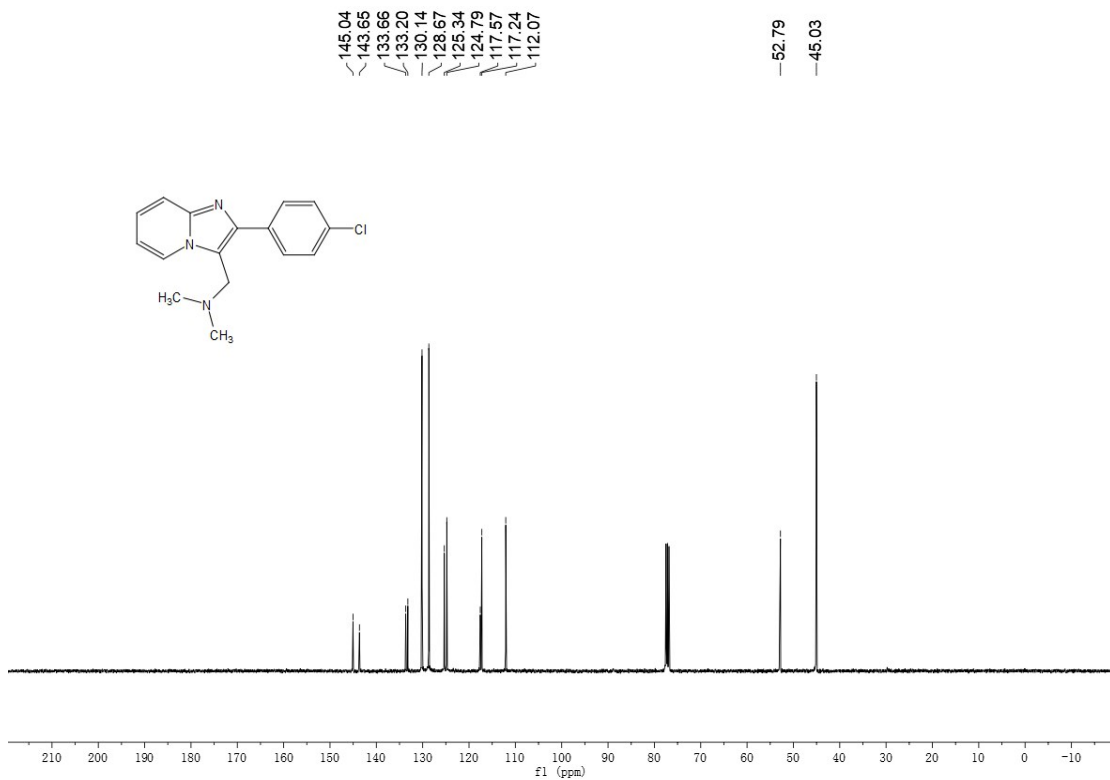



$^1\text{H}$  NMR and  $^{13}\text{C}$  NMR spectrum of compound **7f**

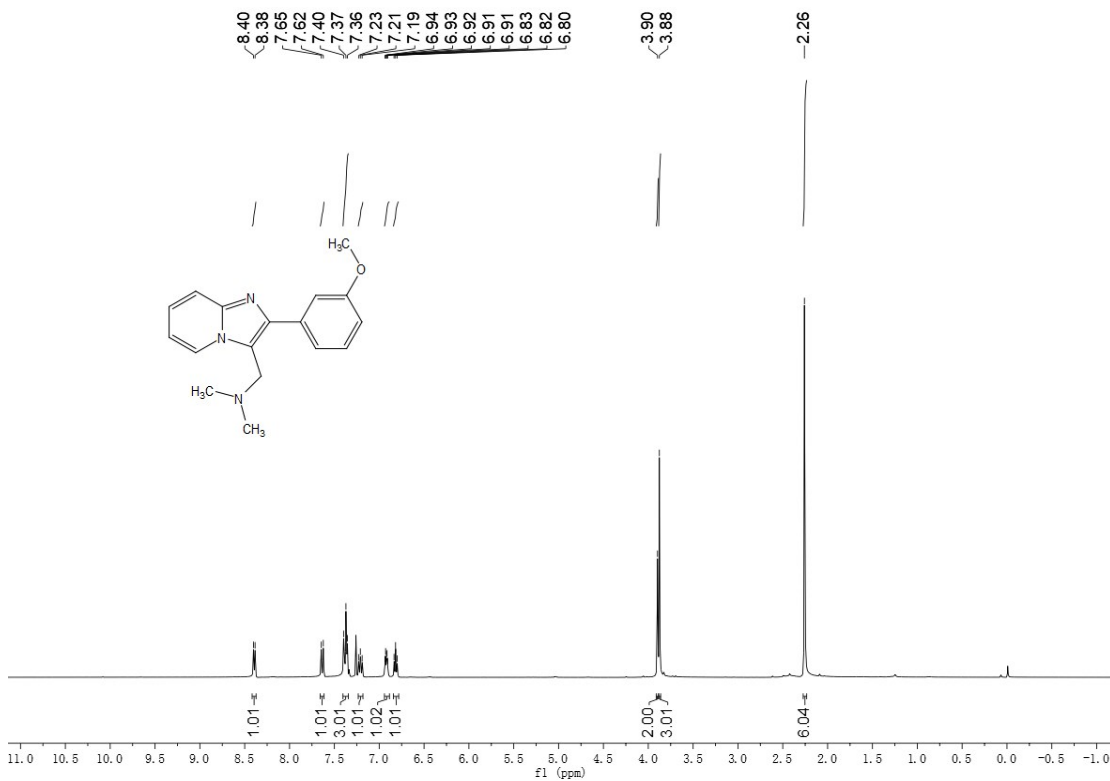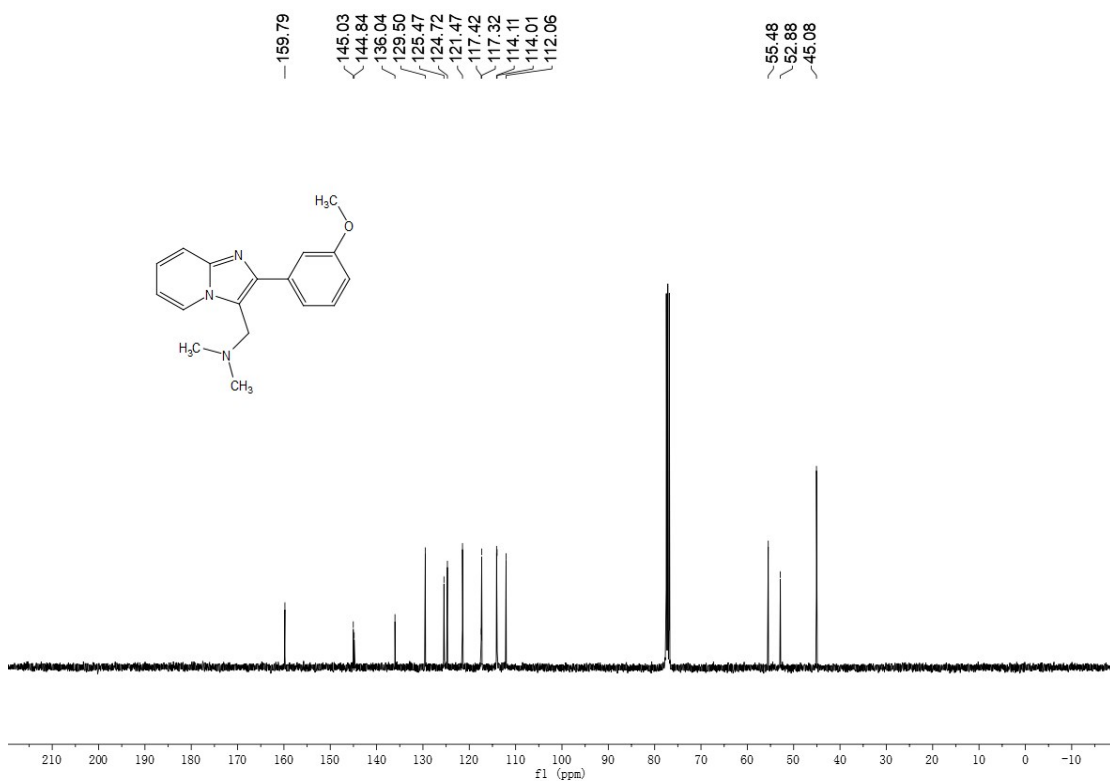

$^1\text{H}$  NMR and  $^{13}\text{C}$  NMR spectrum of compound **7g**

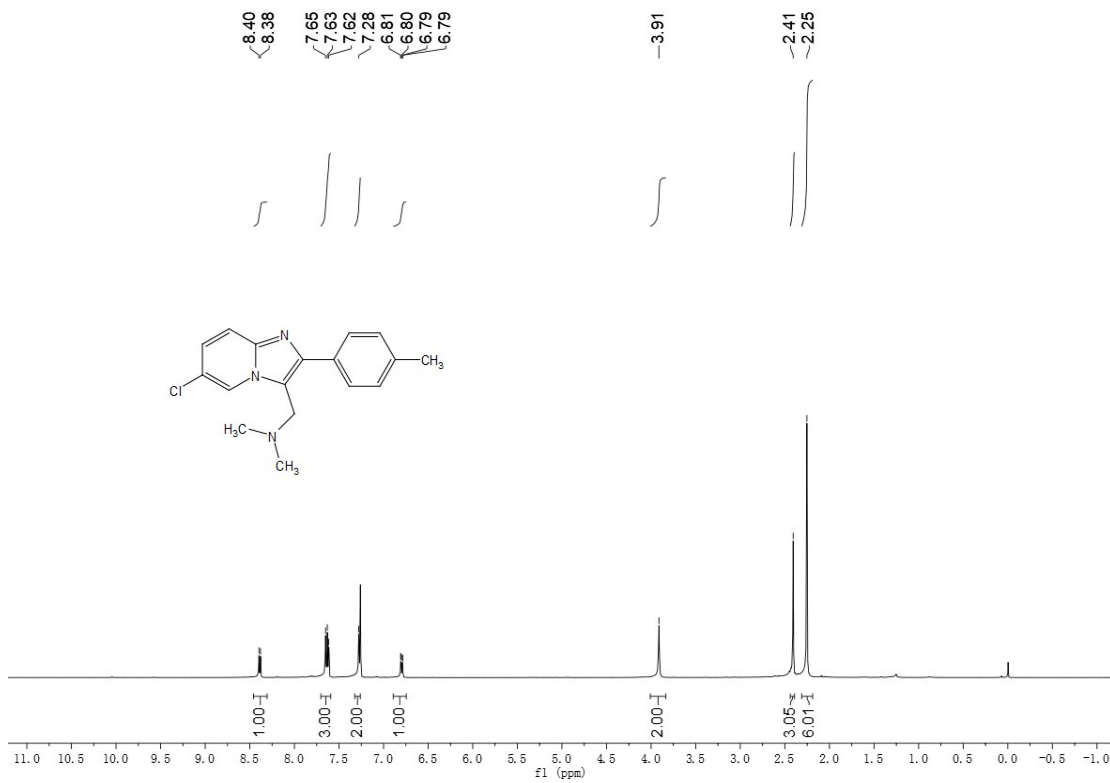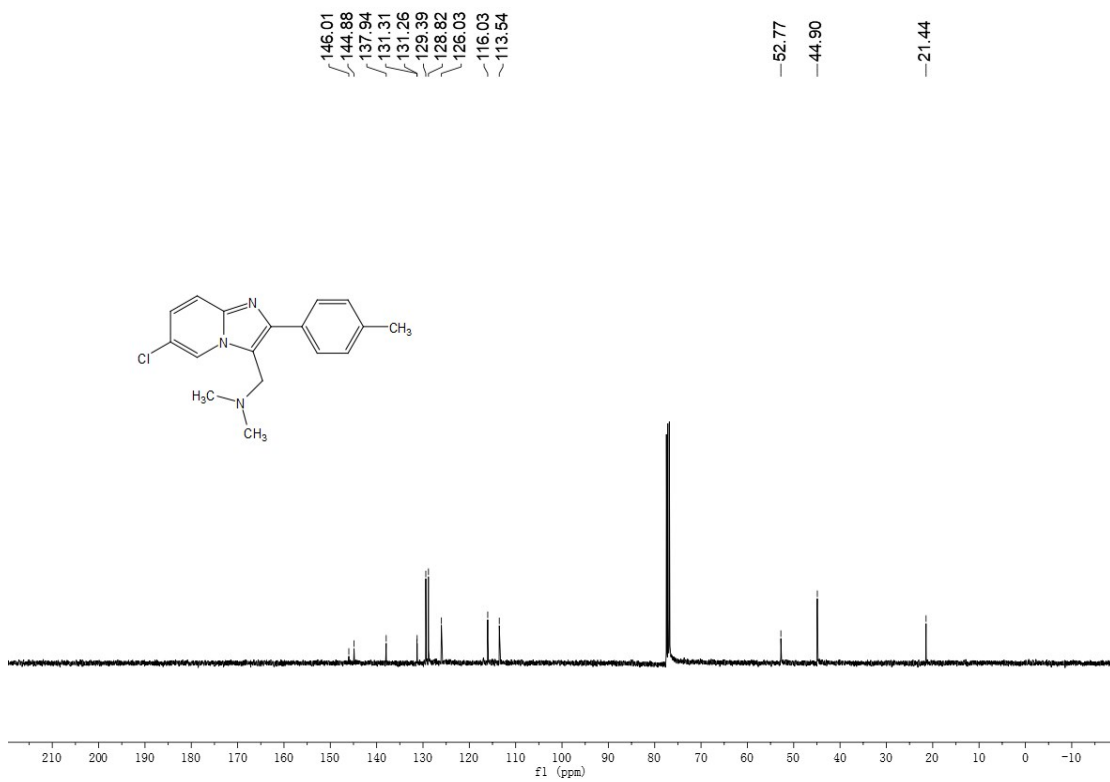

$^1\text{H}$  NMR and  $^{13}\text{C}$  NMR spectrum of compound **8a**

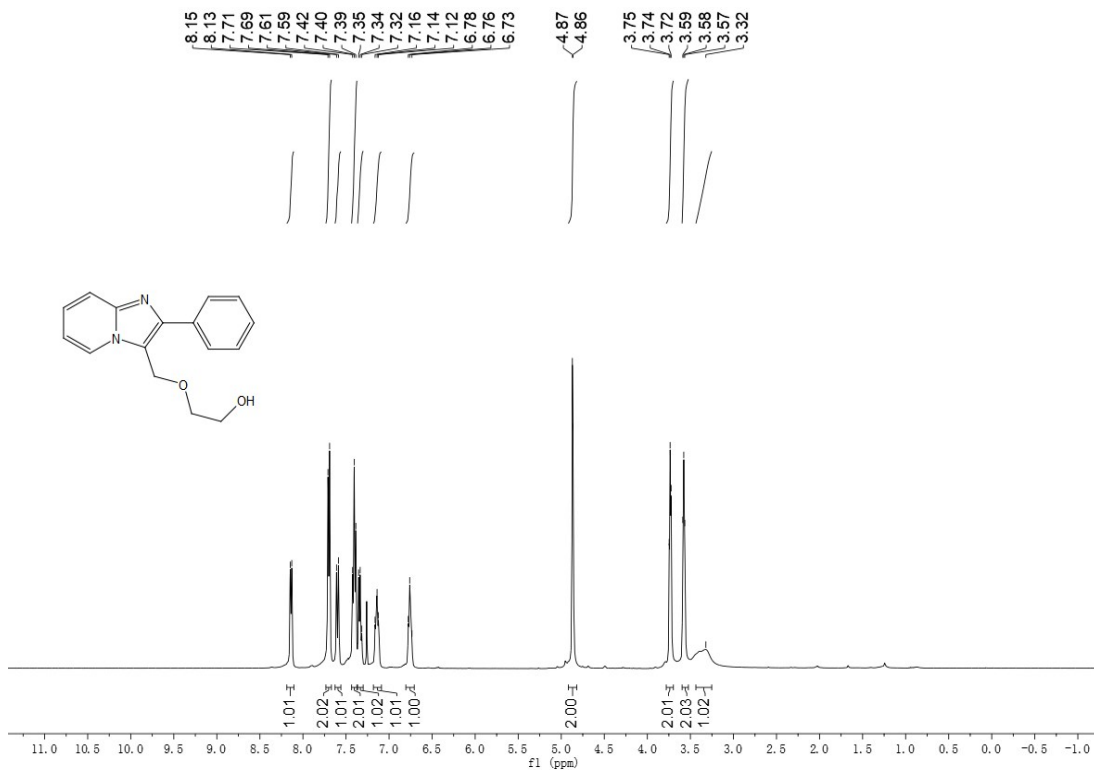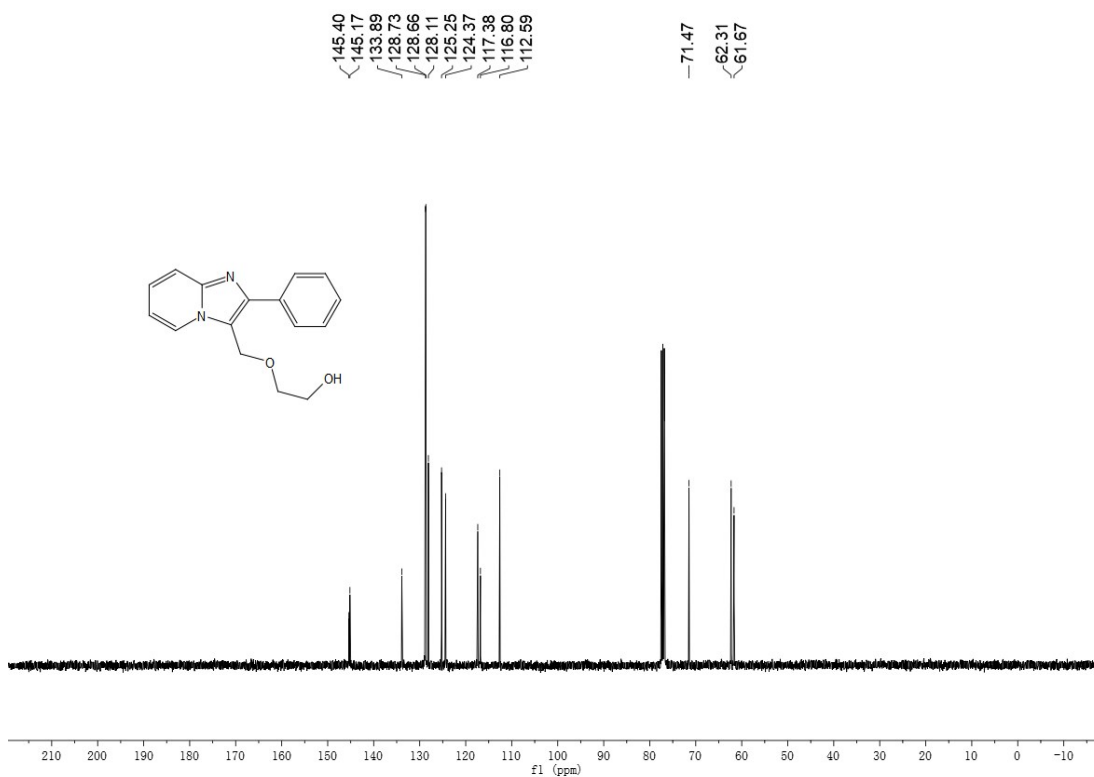

<sup>1</sup>H NMR and <sup>13</sup>C NMR spectrum of compound **8b**

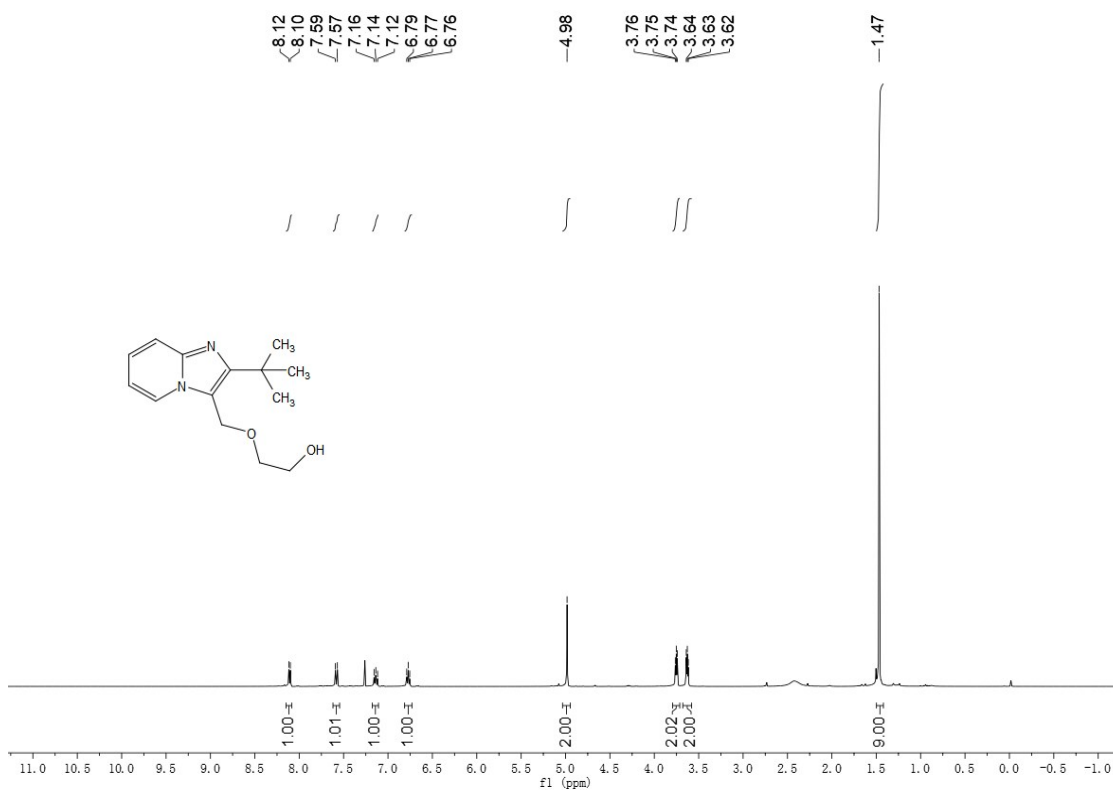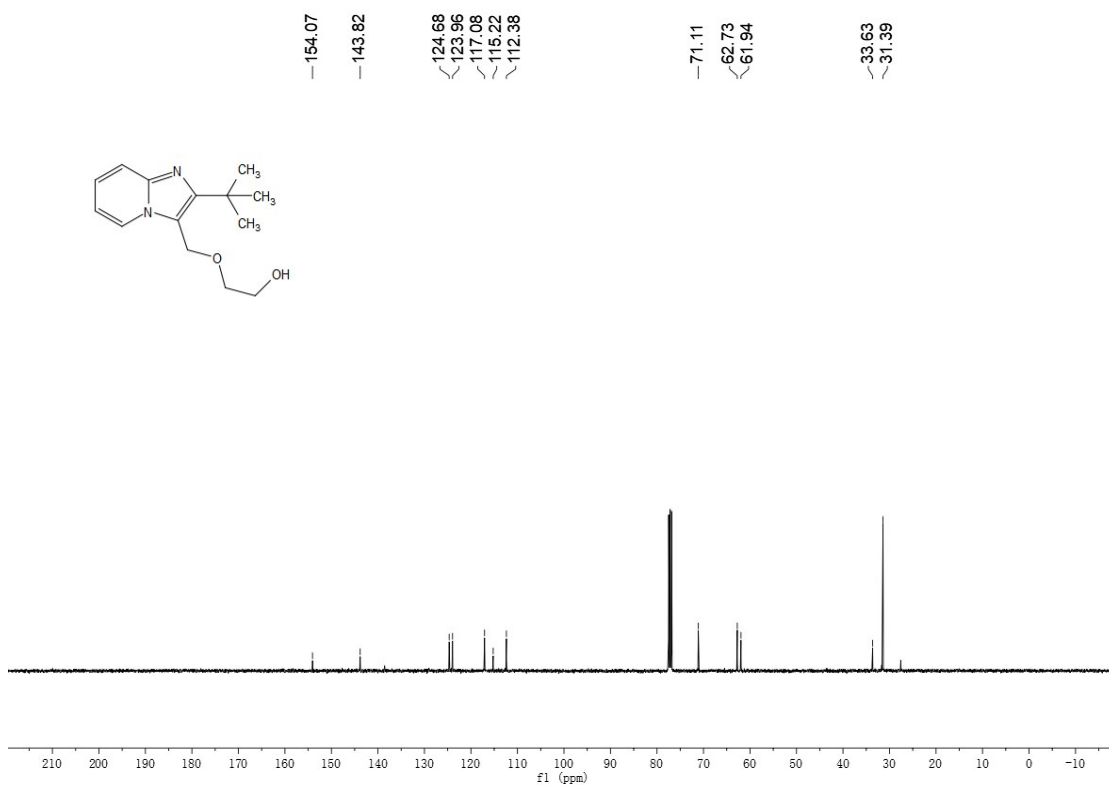

$^1\text{H}$  NMR and  $^{13}\text{C}$  NMR spectrum of compound **10a**

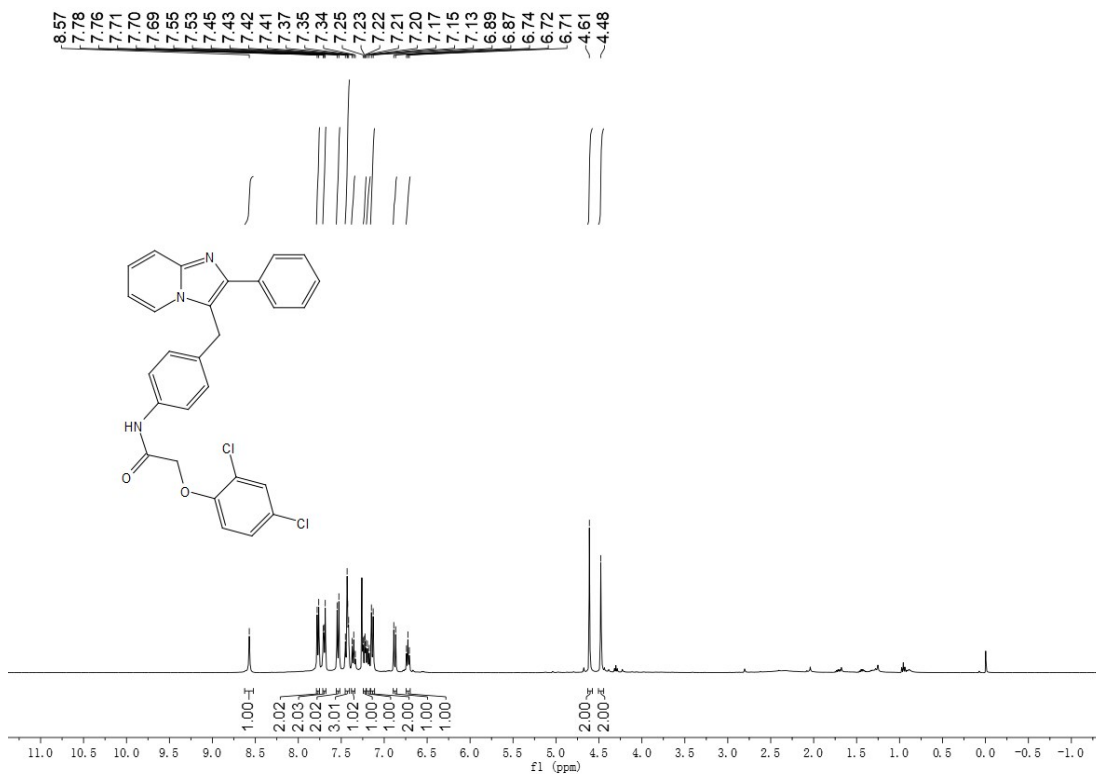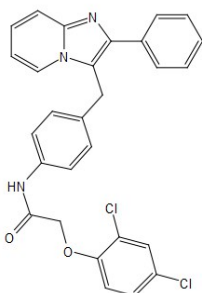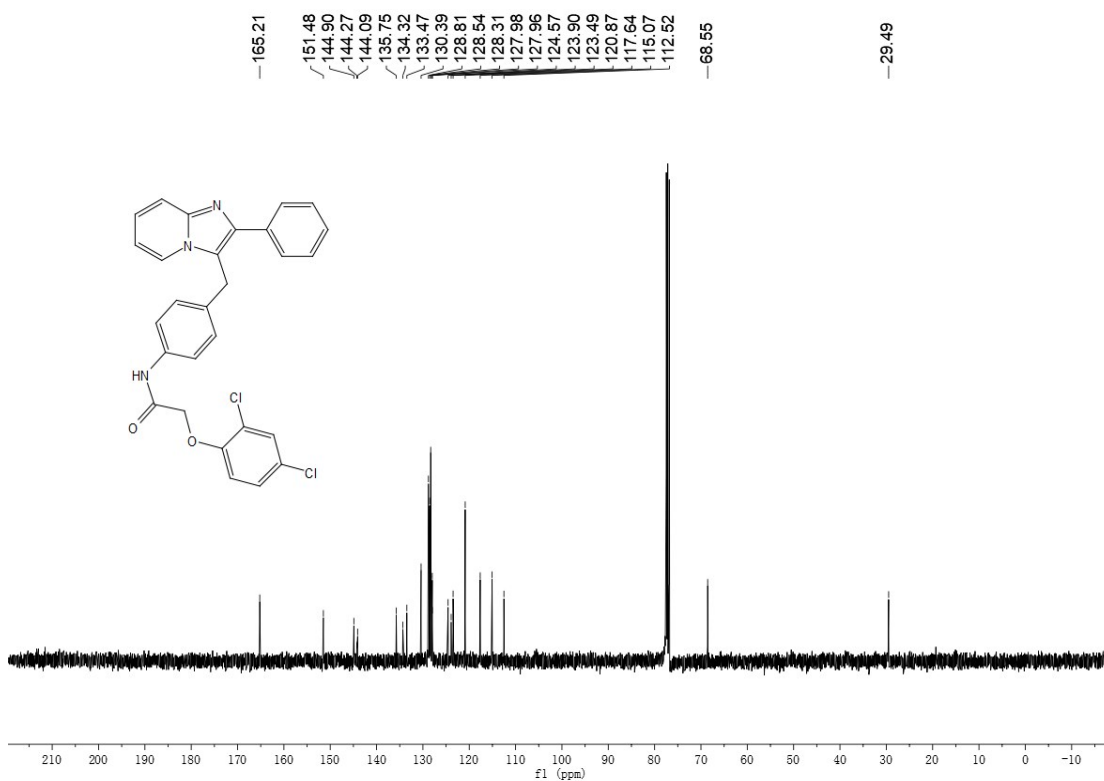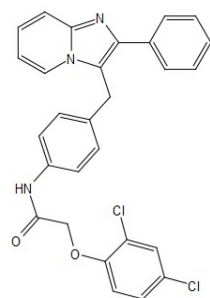

$^1\text{H}$  NMR and  $^{13}\text{C}$  NMR spectrum of compound **10b**

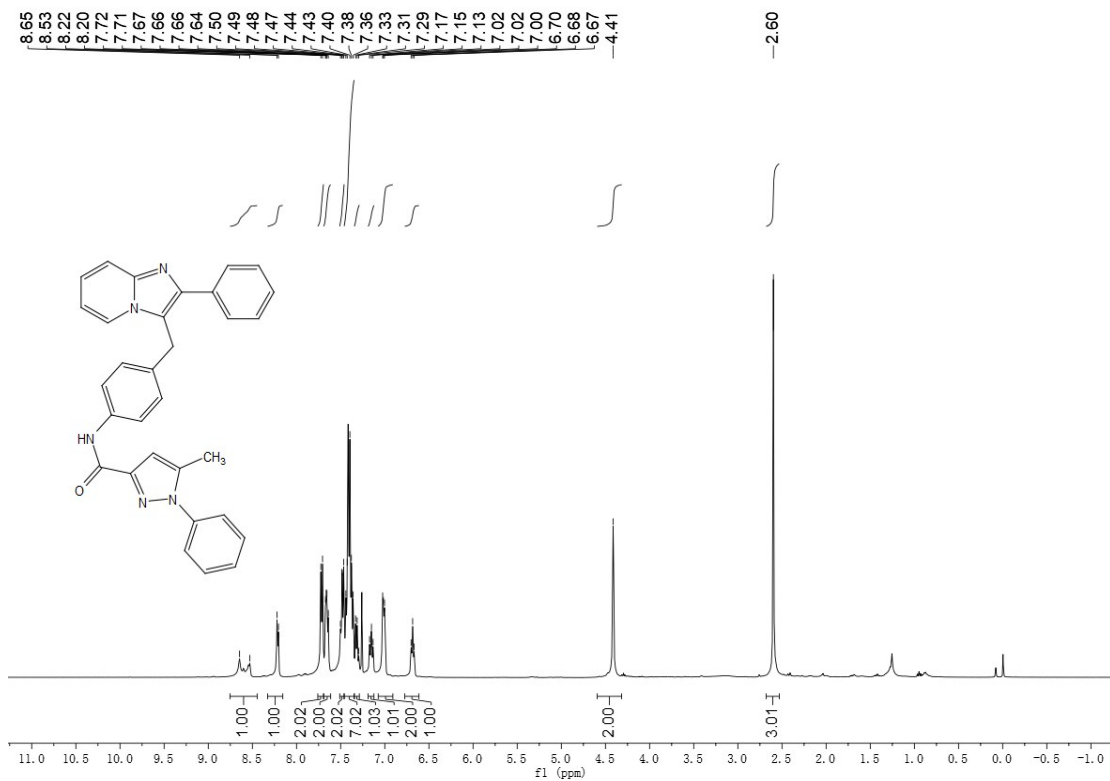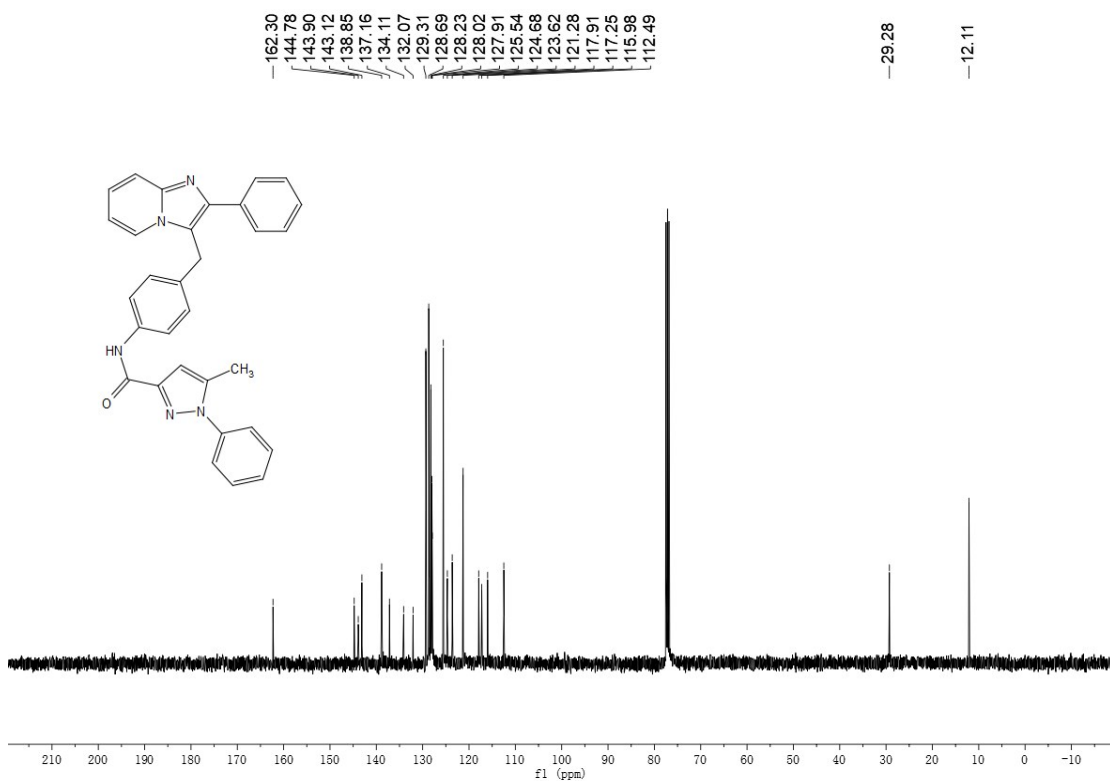

$^1\text{H}$  NMR and  $^{13}\text{C}$  NMR spectrum of compound **10c**

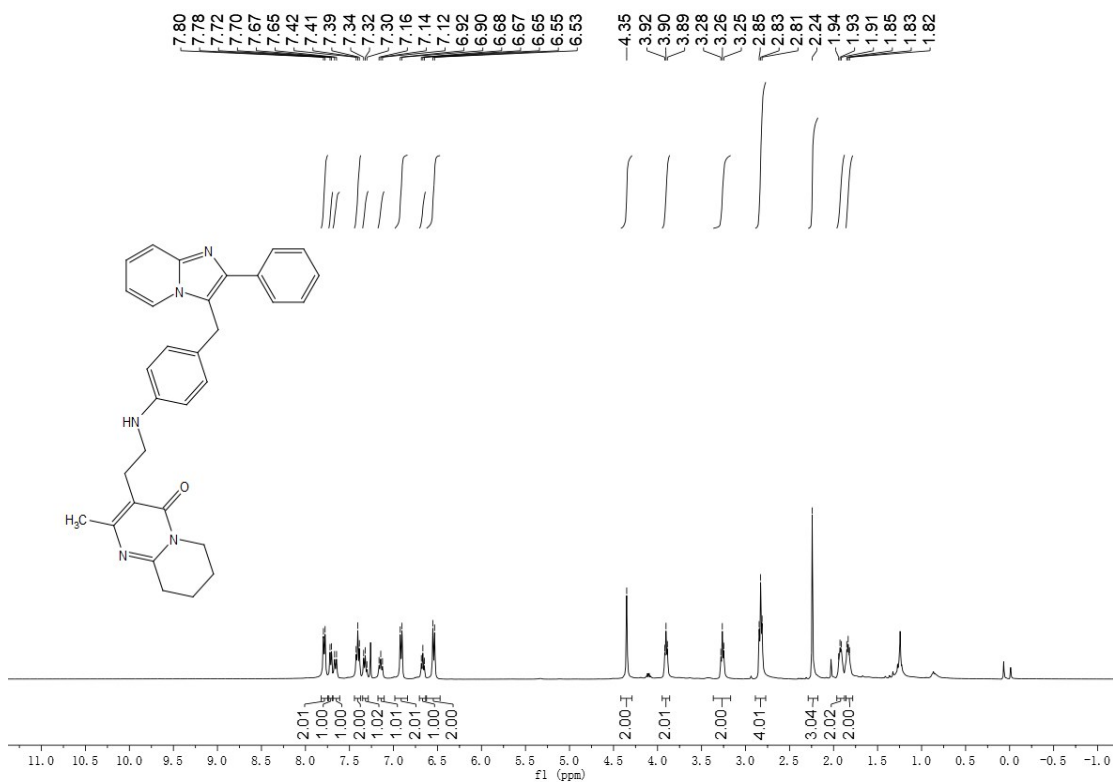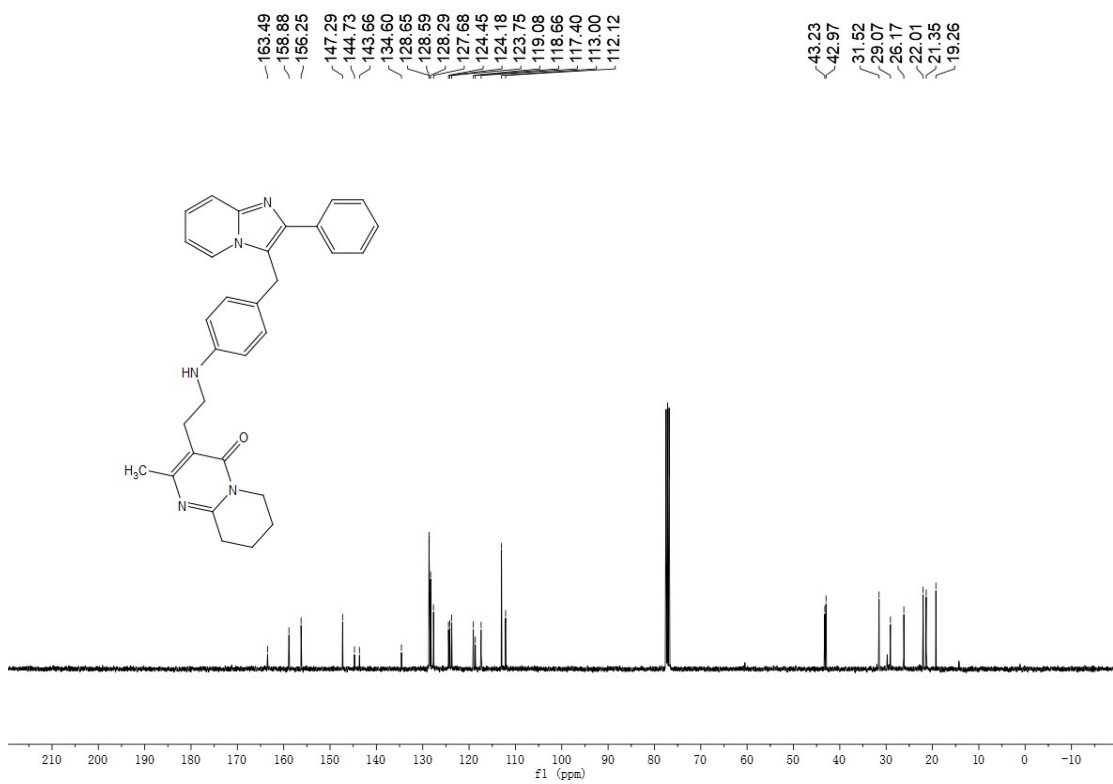

$^1\text{H}$  NMR and  $^{13}\text{C}$  NMR spectrum of compound **10d**

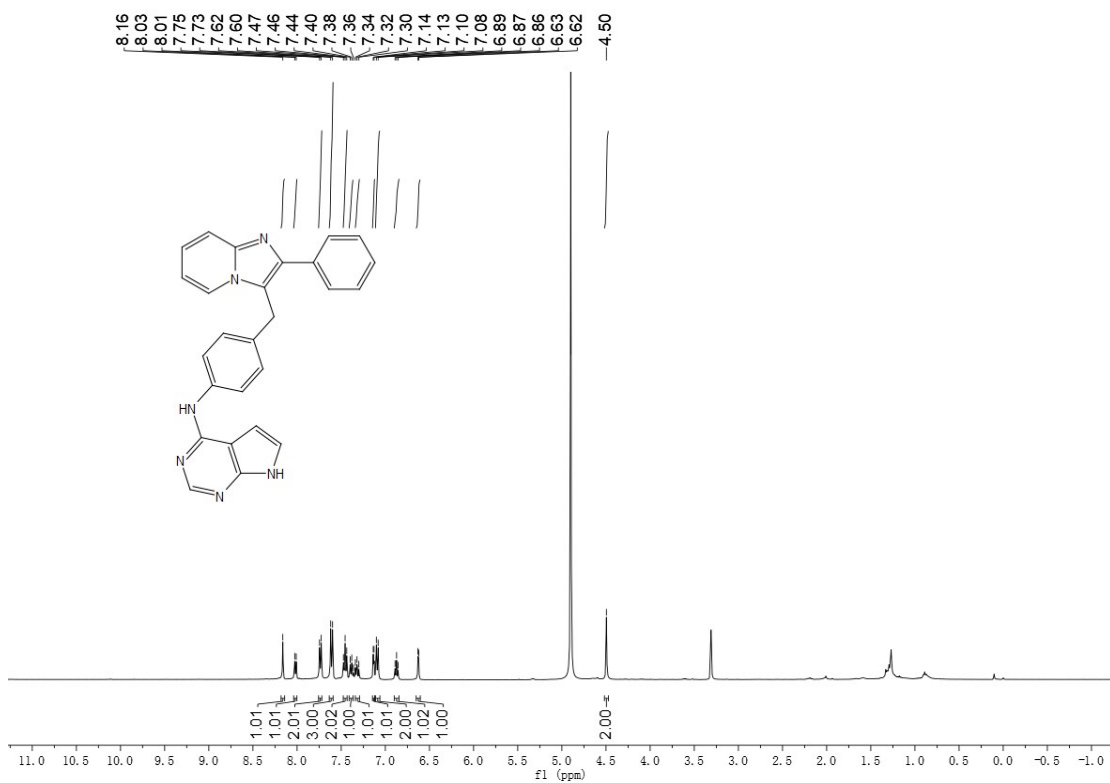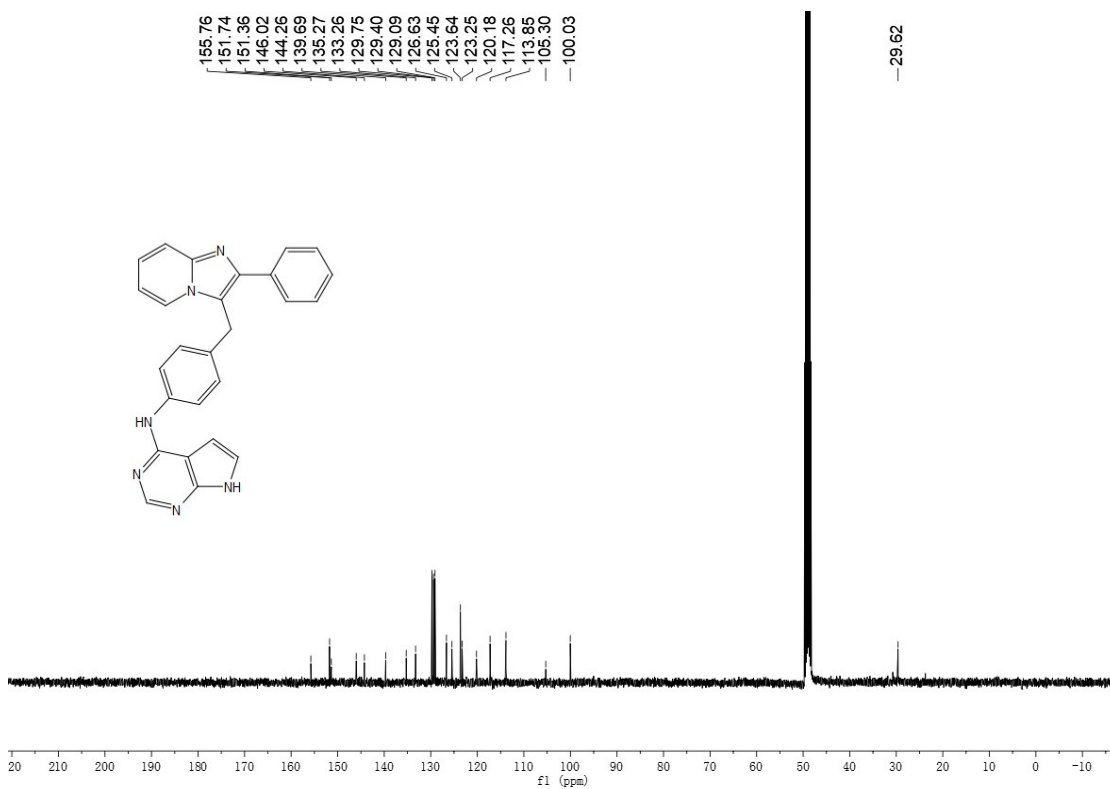



$^1\text{H}$  NMR and  $^{13}\text{C}$  NMR spectrum of compound **10e**

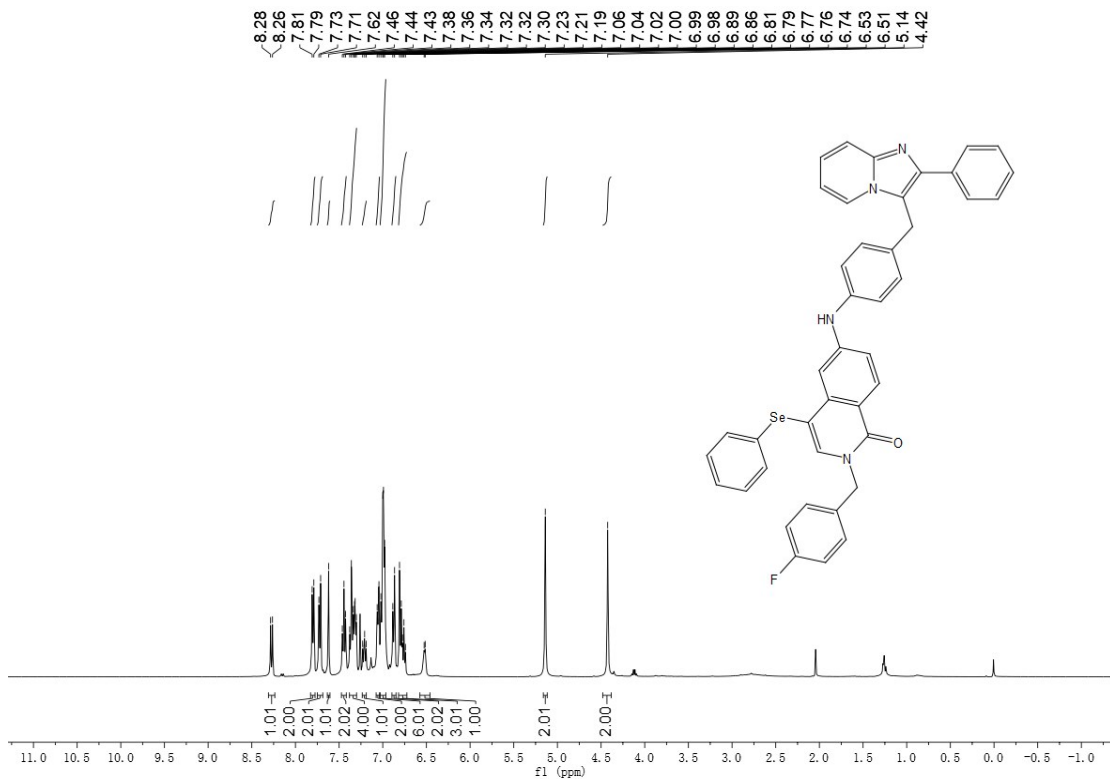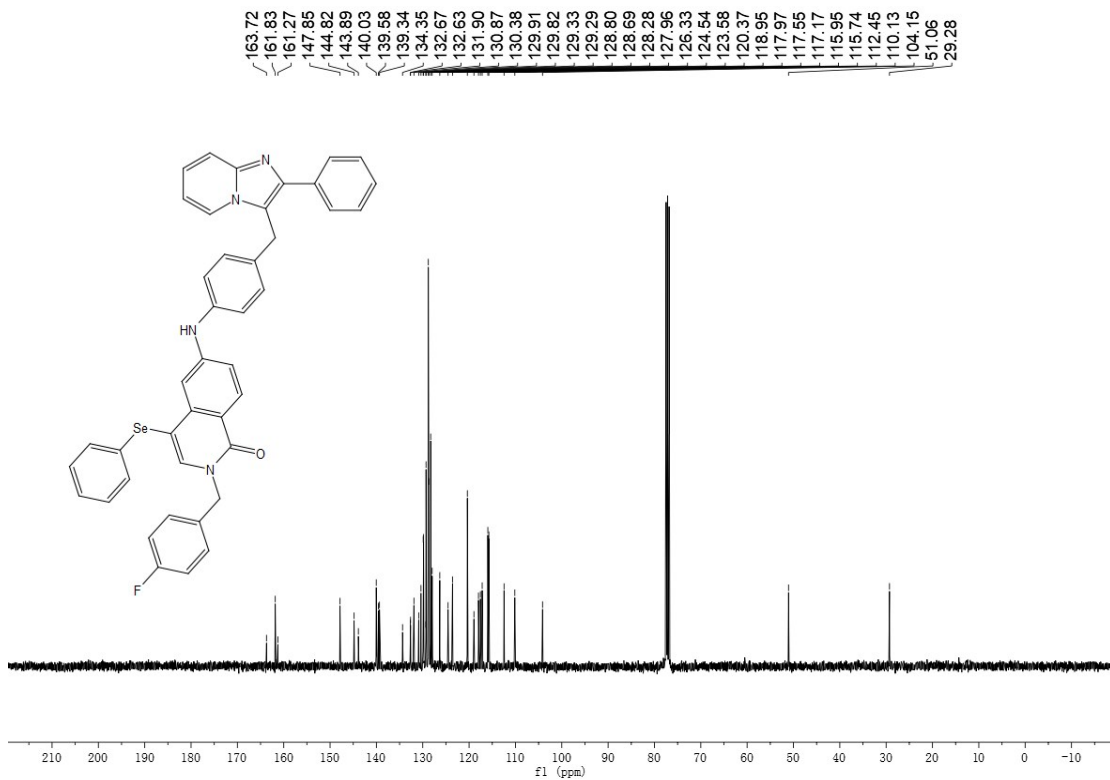

<sup>1</sup>H NMR and <sup>13</sup>C NMR spectrum of compound **10f**

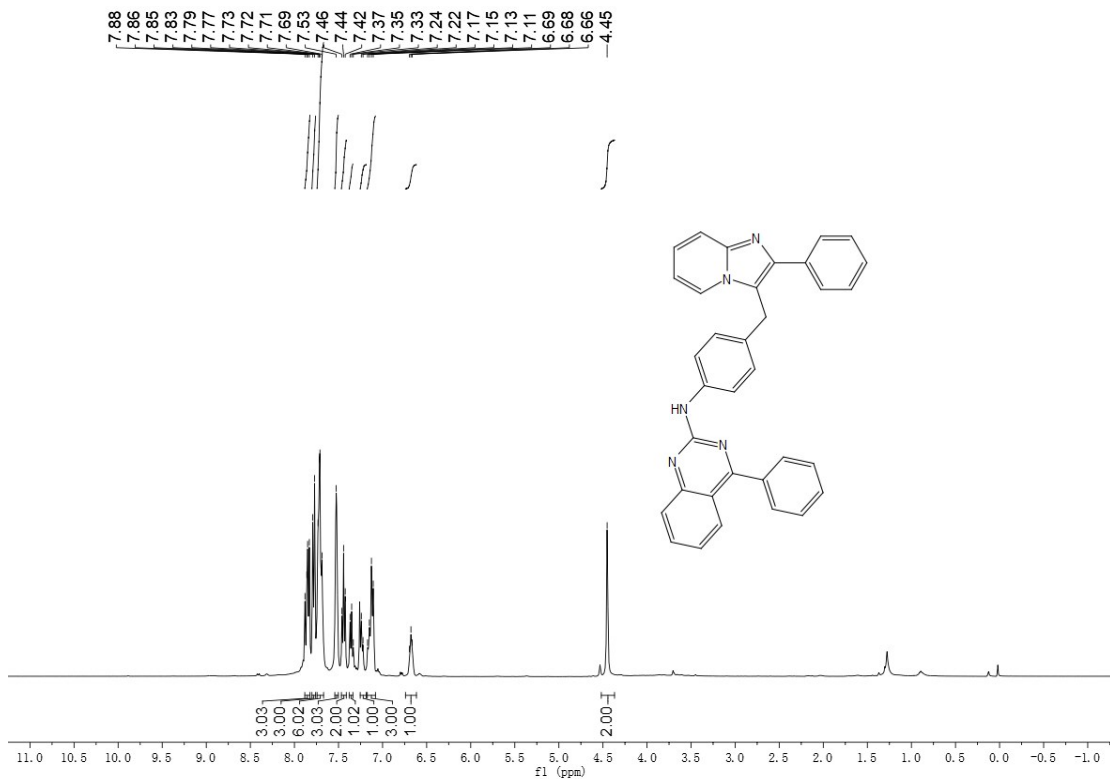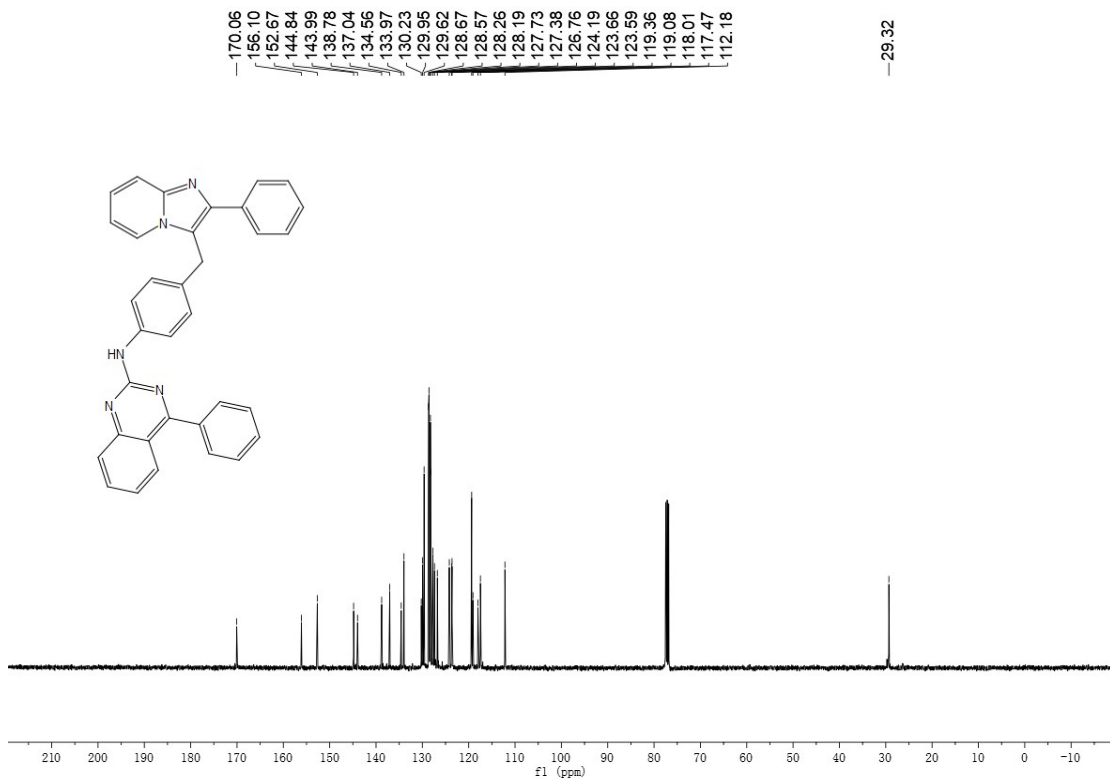

$^1\text{H}$  NMR and  $^{13}\text{C}$  NMR spectrum of compound **12f**

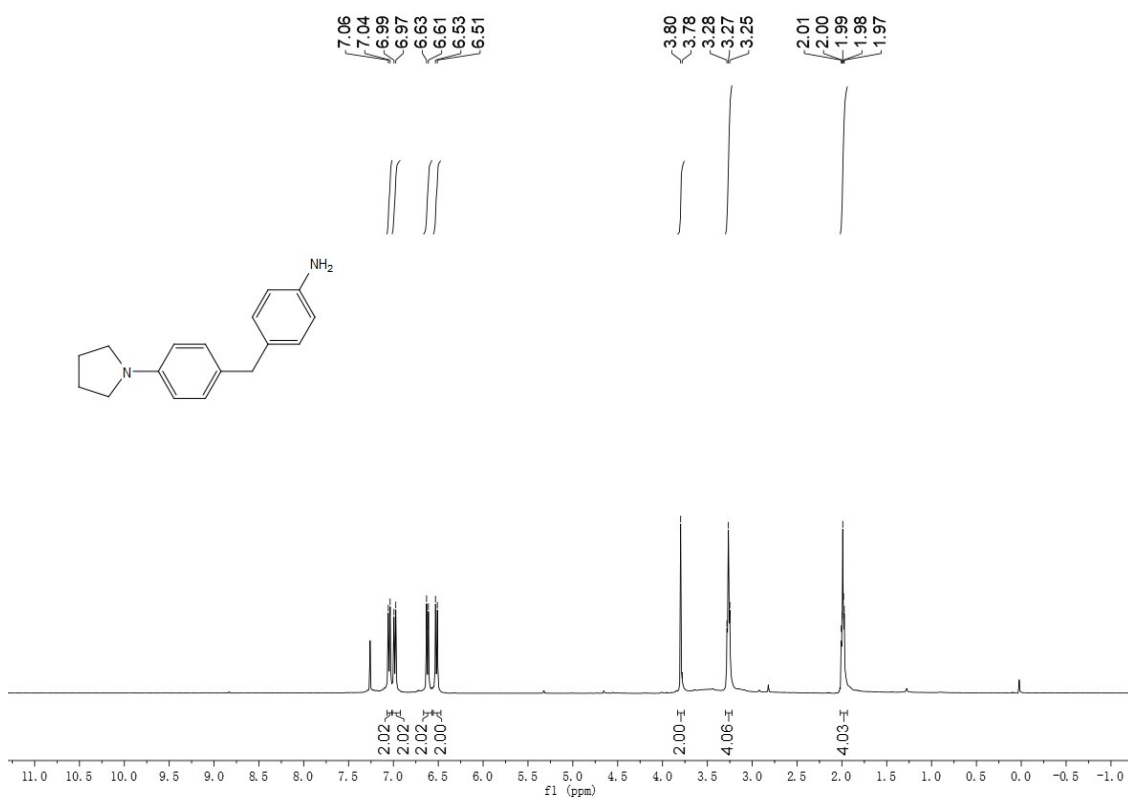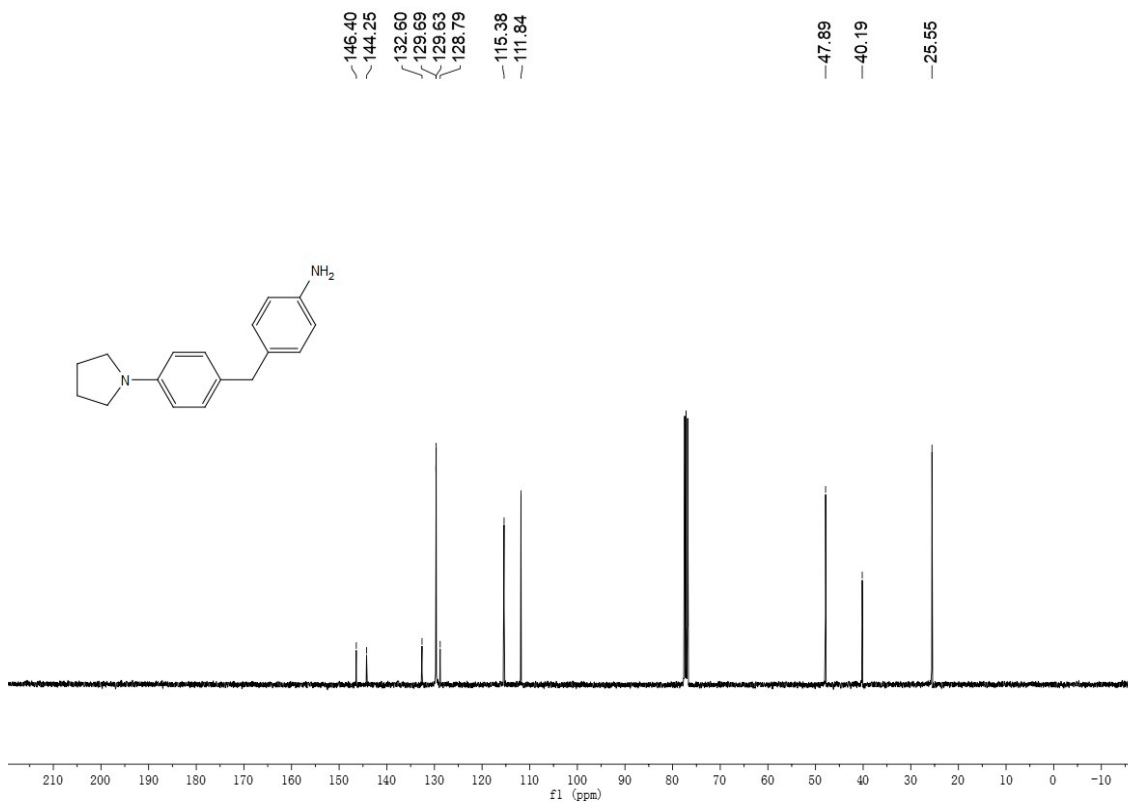

## 4. X-ray crystallographic data

Figure 1 X-ray single crystal structure of **3ad**

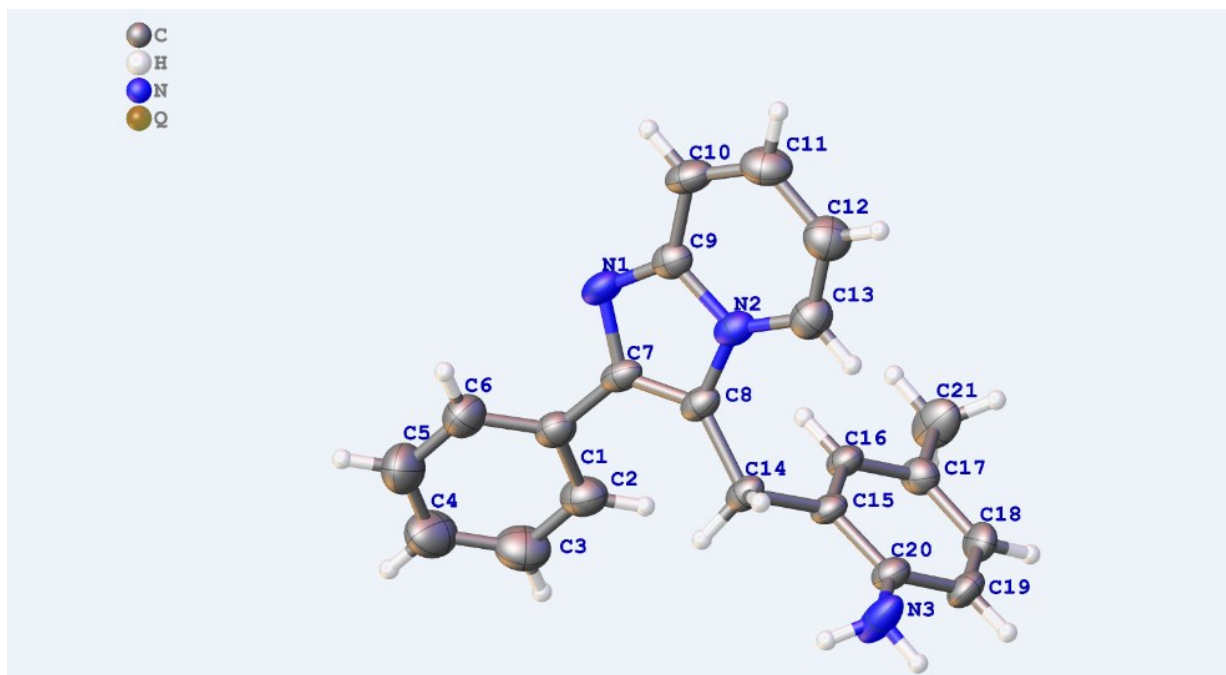

Single crystals of **3ad** were grown by slow evaporation of its EA/PE solution. Single-crystal X-ray diffraction data were collected with a 'multiwire proportional' diffractometer. The crystal was kept at 149.99 K during data collection. Using Olex2, the structure was solved with the olex2.solve structure solution program using Charge Flipping and refined with the olex2.refine refinement package using Least Squares minimization. Supplementary crystallographic data have been deposited at the Cambridge Crystallographic Data Center (CCDC 2071329).

**Table 1** Crystal data and structure refinement for **3ad**

|                                       |                                                |
|---------------------------------------|------------------------------------------------|
| Identification code                   | 354s-2                                         |
| Empirical formula                     | C <sub>21</sub> H <sub>19</sub> N <sub>3</sub> |
| Formula weight                        | 313.39                                         |
| Temperature/K                         | 149.99(10)                                     |
| Crystal system                        | monoclinic                                     |
| Space group                           | P2 <sub>1</sub> /n                             |
| a/Å                                   | 9.5361(5)                                      |
| b/Å                                   | 11.7175(7)                                     |
| c/Å                                   | 15.5248(11)                                    |
| $\alpha$ /°                           | 90                                             |
| $\beta$ /°                            | 91.900(5)                                      |
| $\gamma$ /°                           | 90                                             |
| Volume/Å <sup>3</sup>                 | 1733.78(18)                                    |
| Z                                     | 4                                              |
| $\rho_{\text{calc}}$ /cm <sup>3</sup> | 1.201                                          |
| $\mu$ /mm <sup>-1</sup>               | 0.558                                          |

|                                        |                                                               |
|----------------------------------------|---------------------------------------------------------------|
| F(000)                                 | 664.0                                                         |
| Crystal size/mm <sup>3</sup>           | 0.13 × 0.12 × 0.1                                             |
| Radiation                              | Cu K $\alpha$ ( $\lambda$ = 1.54184)                          |
| 2 $\theta$ range for data collection/° | 9.458 to 147.036                                              |
| Index ranges                           | -11 ≤ h ≤ 6, -13 ≤ k ≤ 14, -18 ≤ l ≤ 19                       |
| Reflections collected                  | 6918                                                          |
| Independent reflections                | 3405 [R <sub>int</sub> = 0.0691, R <sub>sigma</sub> = 0.0715] |
| Data/restraints/parameters             | 3405/0/219                                                    |
| Goodness-of-fit on F <sup>2</sup>      | 1.143                                                         |
| Final R indexes [I ≥ 2 $\sigma$ (I)]   | R <sub>1</sub> = 0.1040, wR <sub>2</sub> = 0.2820             |
| Final R indexes [all data]             | R <sub>1</sub> = 0.1163, wR <sub>2</sub> = 0.2933             |

**Table 2** Bond Lengths for **3ad**

| Atom | Atom | Length/Å | Atom | Atom | Length/Å |
|------|------|----------|------|------|----------|
| N1   | C7   | 1.376(4) | C8   | C14  | 1.502(4) |
| N1   | C9   | 1.338(5) | C9   | C10  | 1.420(5) |
| N2   | C8   | 1.393(5) | C10  | C11  | 1.370(6) |
| N2   | C9   | 1.380(4) | C11  | C12  | 1.414(6) |
| N2   | C13  | 1.366(5) | C12  | C13  | 1.345(6) |
| N3   | C20  | 1.388(5) | C14  | C15  | 1.516(4) |
| C1   | C2   | 1.400(5) | C15  | C16  | 1.385(5) |
| C1   | C6   | 1.385(6) | C15  | C20  | 1.404(5) |
| C1   | C7   | 1.486(5) | C16  | C17  | 1.393(5) |
| C2   | C3   | 1.382(6) | C17  | C18  | 1.393(5) |
| C3   | C4   | 1.398(8) | C17  | C21  | 1.498(5) |
| C4   | C5   | 1.364(7) | C18  | C19  | 1.380(5) |
| C5   | C6   | 1.389(6) | C19  | C20  | 1.387(5) |
| C7   | C8   | 1.359(5) |      |      |          |

**Table 3** Bond Angles for **3ad**

| Atom | Atom | Atom | Angle/°  | Atom | Atom | Atom | Angle/°  |
|------|------|------|----------|------|------|------|----------|
| C9   | N1   | C7   | 104.2(3) | N1   | C9   | C10  | 130.0(3) |
| C9   | N2   | C8   | 106.8(3) | N2   | C9   | C10  | 118.5(3) |
| C13  | N2   | C8   | 130.6(3) | C11  | C10  | C9   | 118.7(3) |
| C13  | N2   | C9   | 122.6(3) | C10  | C11  | C12  | 120.2(4) |
| C2   | C1   | C7   | 120.7(3) | C13  | C12  | C11  | 120.9(4) |
| C6   | C1   | C2   | 119.1(4) | C12  | C13  | N2   | 119.1(4) |
| C6   | C1   | C7   | 120.2(3) | C8   | C14  | C15  | 116.8(3) |
| C3   | C2   | C1   | 120.8(4) | C16  | C15  | C14  | 121.7(3) |
| C2   | C3   | C4   | 119.2(4) | C16  | C15  | C20  | 119.4(3) |
| C5   | C4   | C3   | 120.1(4) | C20  | C15  | C14  | 118.9(3) |
| C4   | C5   | C6   | 121.1(5) | C15  | C16  | C17  | 122.6(3) |

|    |    |     |          |     |     |     |          |
|----|----|-----|----------|-----|-----|-----|----------|
| C1 | C6 | C5  | 119.7(4) | C16 | C17 | C18 | 117.1(3) |
| N1 | C7 | C1  | 119.4(3) | C16 | C17 | C21 | 121.8(3) |
| C8 | C7 | N1  | 112.5(3) | C18 | C17 | C21 | 121.1(3) |
| C8 | C7 | C1  | 127.9(3) | C19 | C18 | C17 | 121.3(3) |
| N2 | C8 | C14 | 120.8(3) | C18 | C19 | C20 | 121.3(3) |
| C7 | C8 | N2  | 104.9(3) | N3  | C20 | C15 | 121.1(3) |
| C7 | C8 | C14 | 133.8(3) | C19 | C20 | N3  | 120.4(3) |
| N1 | C9 | N2  | 111.5(3) | C19 | C20 | C15 | 118.4(3) |

**Figure 2** X-ray single crystal structure of **3ac**

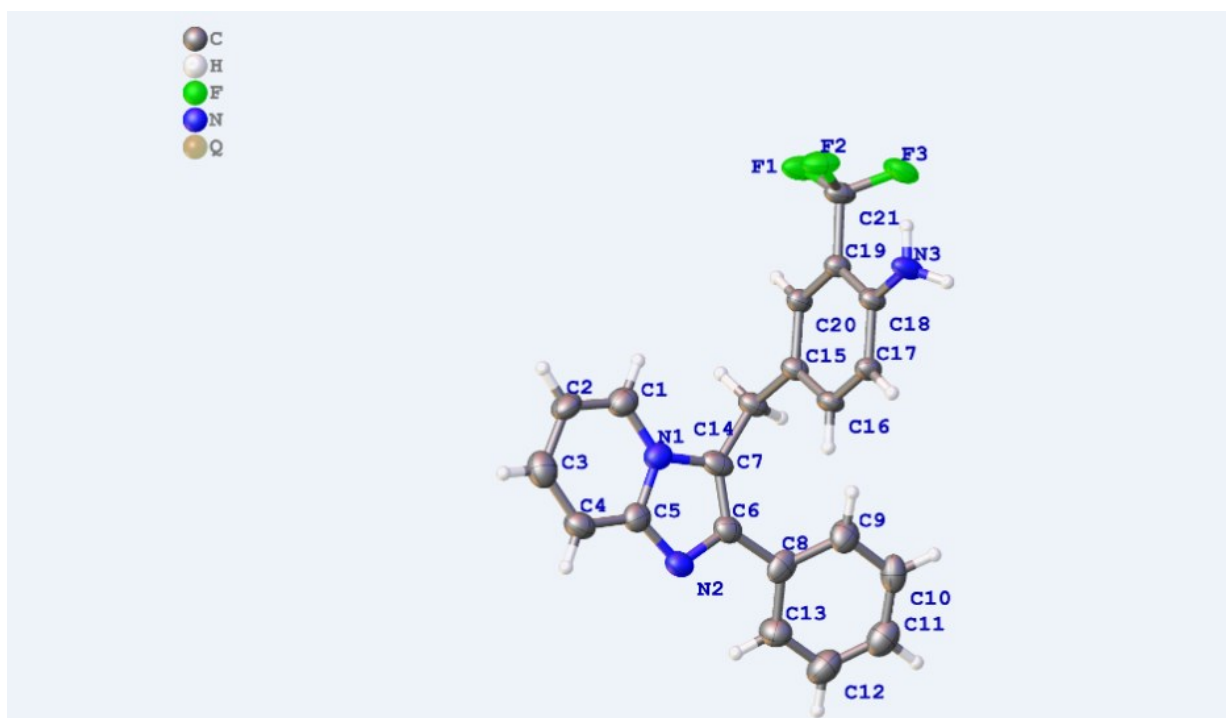

Single crystals of **3ac** were grown by slow evaporation of its EA/PE solution. Single-crystal X-ray diffraction data were collected with a 'multiwire proportional' diffractometer. The crystal was kept at 150 K during data collection. Using Olex2, the structure was solved with the olex2.solve structure solution program using Charge Flipping and refined with the olex2.refine refinement package using Least Squares minimization. Supplementary crystallographic data have been deposited at the Cambridge Crystallographic Data Center (CCDC 2071330).

**Table 4** Crystal data and structure refinement for **3ac**

|                     |                                                               |
|---------------------|---------------------------------------------------------------|
| Identification code | 401s                                                          |
| Empirical formula   | C <sub>21</sub> H <sub>16</sub> F <sub>3</sub> N <sub>3</sub> |
| Formula weight      | 367.37                                                        |
| Temperature/K       | 150.00(10)                                                    |
| Crystal system      | triclinic                                                     |
| Space group         | P-1                                                           |

|                                        |                                                               |
|----------------------------------------|---------------------------------------------------------------|
| a/Å                                    | 9.3630(12)                                                    |
| b/Å                                    | 9.7796(13)                                                    |
| c/Å                                    | 10.8395(14)                                                   |
| $\alpha$ /°                            | 71.593(12)                                                    |
| $\beta$ /°                             | 70.494(12)                                                    |
| $\gamma$ /°                            | 70.814(12)                                                    |
| Volume/Å <sup>3</sup>                  | 859.6(2)                                                      |
| Z                                      | 2                                                             |
| $\rho_{\text{calc}}$ /cm <sup>3</sup>  | 1.419                                                         |
| $\mu$ /mm <sup>-1</sup>                | 0.910                                                         |
| F(000)                                 | 380.0                                                         |
| Crystal size/mm <sup>3</sup>           | 0.13 × 0.11 × 0.1                                             |
| Radiation                              | Cu K $\alpha$ ( $\lambda$ = 1.54184)                          |
| 2 $\theta$ range for data collection/° | 8.896 to 133.136                                              |
| Index ranges                           | -9 ≤ h ≤ 11, -11 ≤ k ≤ 11, -12 ≤ l ≤ 12                       |
| Reflections collected                  | 5339                                                          |
| Independent reflections                | 3032 [R <sub>int</sub> = 0.0430, R <sub>sigma</sub> = 0.0586] |
| Data/restraints/parameters             | 3032/35/245                                                   |
| Goodness-of-fit on F <sup>2</sup>      | 1.050                                                         |
| Final R indexes [I ≥ 2 $\sigma$ (I)]   | R <sub>1</sub> = 0.0879, wR <sub>2</sub> = 0.2465             |
| Final R indexes [all data]             | R <sub>1</sub> = 0.1059, wR <sub>2</sub> = 0.2674             |

**Table 5** Bond Lengths for **3ac**

| Atom | Atom | Length/Å | Atom | Atom | Length/Å |
|------|------|----------|------|------|----------|
| F2   | C21  | 1.363(5) | C20  | C15  | 1.385(5) |
| F3   | C21  | 1.342(5) | C15  | C14  | 1.524(5) |
| F1   | C21  | 1.324(4) | C5   | C4   | 1.390(6) |
| N1   | C5   | 1.362(5) | C1   | C2   | 1.342(6) |
| N1   | C1   | 1.356(5) | C14  | C7   | 1.503(5) |
| N1   | C7   | 1.411(6) | C8   | C13  | 1.387(6) |
| N3   | C18  | 1.360(5) | C8   | C6   | 1.475(6) |
| N2   | C5   | 1.362(5) | C8   | C9   | 1.442(6) |
| N2   | C6   | 1.368(5) | C10  | C9   | 1.387(6) |
| C16  | C17  | 1.371(5) | C10  | C11  | 1.368(7) |
| C16  | C15  | 1.402(5) | C13  | C12  | 1.353(6) |
| C17  | C18  | 1.416(5) | C6   | C7   | 1.357(6) |
| C19  | C20  | 1.395(5) | C4   | C3   | 1.413(7) |
| C19  | C18  | 1.417(5) | C2   | C3   | 1.438(7) |
| C19  | C21  | 1.487(5) | C11  | C12  | 1.352(7) |

**Table 6** Bond Angles for **3ac**

| Atom | Atom | Atom | Angle/°  | Atom | Atom | Atom | Angle/°  |
|------|------|------|----------|------|------|------|----------|
| C5   | N1   | C7   | 107.5(3) | N1   | C5   | N2   | 110.7(4) |
| C1   | N1   | C5   | 121.2(4) | N1   | C5   | C4   | 120.4(4) |
| C1   | N1   | C7   | 131.3(4) | N2   | C5   | C4   | 128.9(4) |
| C5   | N2   | C6   | 104.5(3) | C2   | C1   | N1   | 121.4(4) |
| C17  | C16  | C15  | 122.0(3) | C7   | C14  | C15  | 114.2(3) |
| C16  | C17  | C18  | 121.6(3) | C13  | C8   | C6   | 122.2(4) |
| C20  | C19  | C18  | 120.7(3) | C13  | C8   | C9   | 116.2(4) |
| C20  | C19  | C21  | 118.9(3) | C9   | C8   | C6   | 121.6(4) |
| C18  | C19  | C21  | 120.4(3) | C11  | C10  | C9   | 121.1(4) |
| C15  | C20  | C19  | 122.2(3) | C12  | C13  | C8   | 123.2(5) |
| N3   | C18  | C17  | 120.2(3) | N2   | C6   | C8   | 118.1(4) |
| N3   | C18  | C19  | 123.5(3) | C7   | C6   | N2   | 112.8(4) |
| C17  | C18  | C19  | 116.3(3) | C7   | C6   | C8   | 129.1(4) |
| F2   | C21  | C19  | 112.6(3) | C5   | C4   | C3   | 119.4(4) |
| F3   | C21  | F2   | 104.7(3) | C10  | C9   | C8   | 118.9(4) |
| F3   | C21  | C19  | 112.4(3) | C1   | C2   | C3   | 120.1(4) |
| F1   | C21  | F2   | 105.3(3) | N1   | C7   | C14  | 120.4(4) |
| F1   | C21  | F3   | 107.0(3) | C6   | C7   | N1   | 104.4(3) |
| F1   | C21  | C19  | 114.1(3) | C6   | C7   | C14  | 135.2(4) |
| C16  | C15  | C14  | 122.9(3) | C12  | C11  | C10  | 120.5(4) |
| C20  | C15  | C16  | 117.0(3) | C4   | C3   | C2   | 117.6(4) |
| C20  | C15  | C14  | 120.1(3) | C11  | C12  | C13  | 120.1(5) |

**Figure 3** X-ray single crystal structure of **4f**



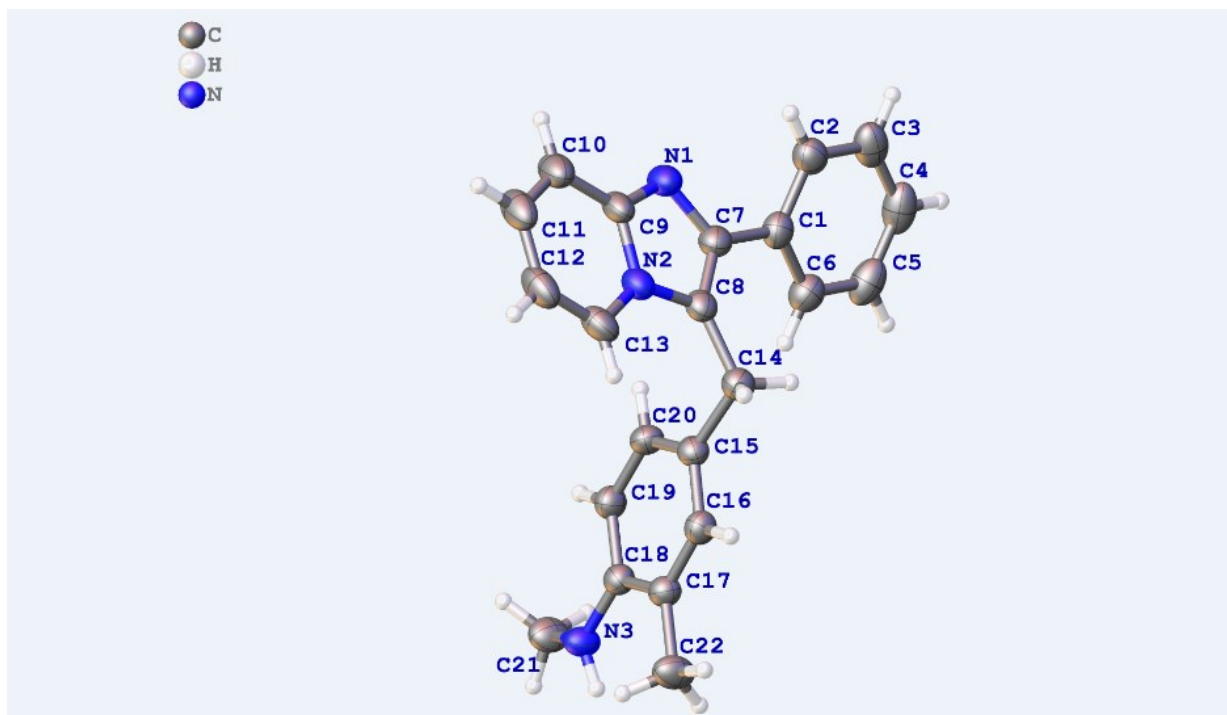

Single crystals of **4f** were grown by slow evaporation of its EA/PE solution. Single-crystal X-ray diffraction data were collected with a 'multiwire proportional' diffractometer. The crystal was kept at 149.99 K during data collection. Using Olex2, the structure was solved with the olex2.solve structure solution program using Charge Flipping and refined with the olex2.refine refinement package using Least Squares minimization. Supplementary crystallographic data have been deposited at the Cambridge Crystallographic Data Center (CCDC 2071331).

**Table 7** Crystal data and structure refinement for **4f**

|                                    |                                                |
|------------------------------------|------------------------------------------------|
| Identification code                | 341s_2                                         |
| Empirical formula                  | C <sub>22</sub> H <sub>21</sub> N <sub>3</sub> |
| Formula weight                     | 327.42                                         |
| Temperature/K                      | 149.99(10)                                     |
| Crystal system                     | monoclinic                                     |
| Space group                        | P2 <sub>1</sub> /n                             |
| a/Å                                | 15.6761(6)                                     |
| b/Å                                | 10.9989(4)                                     |
| c/Å                                | 21.0393(9)                                     |
| α/°                                | 90                                             |
| β/°                                | 98.719(4)                                      |
| γ/°                                | 90                                             |
| Volume/Å <sup>3</sup>              | 3585.7(2)                                      |
| Z                                  | 8                                              |
| ρ <sub>calc</sub> /cm <sup>3</sup> | 1.213                                          |
| μ/mm <sup>-1</sup>                 | 0.560                                          |
| F(000)                             | 1392.0                                         |
| Crystal size/mm <sup>3</sup>       | 0.14 × 0.12 × 0.11                             |

|                                                  |                                                                    |
|--------------------------------------------------|--------------------------------------------------------------------|
| Radiation                                        | Cu K $\alpha$ ( $\lambda = 1.54184$ )                              |
| 2 $\theta$ range for data collection/ $^{\circ}$ | 6.576 to 147.004                                                   |
| Index ranges                                     | $-19 \leq h \leq 13$ , $-13 \leq k \leq 12$ , $-25 \leq l \leq 26$ |
| Reflections collected                            | 14465                                                              |
| Independent reflections                          | 7038 [ $R_{\text{int}} = 0.0429$ , $R_{\text{sigma}} = 0.0504$ ]   |
| Data/restraints/parameters                       | 7038/0/463                                                         |
| Goodness-of-fit on $F^2$                         | 1.029                                                              |
| Final R indexes [ $I \geq 2\sigma(I)$ ]          | $R_1 = 0.0557$ , $wR_2 = 0.1352$                                   |
| Final R indexes [all data]                       | $R_1 = 0.0828$ , $wR_2 = 0.1545$                                   |

**Table 8** Bond Lengths for **4f**

| Atom | Atom | Length/Å | Atom | Atom | Length/Å |
|------|------|----------|------|------|----------|
| N1   | C7   | 1.374(3) | N4   | C23  | 1.332(3) |
| N1   | C9   | 1.330(3) | N4   | C29  | 1.372(3) |
| N2   | C8   | 1.387(3) | N5   | C23  | 1.396(3) |
| N2   | C9   | 1.388(3) | N5   | C27  | 1.383(3) |
| N2   | C13  | 1.378(3) | N5   | C28  | 1.386(3) |
| N3   | C18  | 1.377(3) | N6   | C40  | 1.378(3) |
| N3   | C21  | 1.445(3) | N6   | C44  | 1.444(3) |
| C1   | C2   | 1.394(3) | C23  | C24  | 1.399(3) |
| C1   | C6   | 1.400(3) | C24  | C25  | 1.364(3) |
| C1   | C7   | 1.478(3) | C25  | C26  | 1.416(3) |
| C2   | C3   | 1.385(3) | C26  | C27  | 1.358(3) |
| C3   | C4   | 1.386(4) | C28  | C29  | 1.372(3) |
| C4   | C5   | 1.381(4) | C28  | C36  | 1.493(3) |
| C5   | C6   | 1.389(3) | C29  | C30  | 1.478(3) |
| C7   | C8   | 1.376(3) | C30  | C31  | 1.395(3) |
| C8   | C14  | 1.484(3) | C30  | C35  | 1.396(3) |
| C9   | C10  | 1.411(3) | C31  | C32  | 1.387(3) |
| C10  | C11  | 1.355(4) | C32  | C33  | 1.384(3) |
| C11  | C12  | 1.408(4) | C33  | C34  | 1.387(3) |
| C12  | C13  | 1.360(3) | C34  | C35  | 1.385(3) |
| C14  | C15  | 1.520(3) | C36  | C37  | 1.521(3) |
| C15  | C16  | 1.391(3) | C37  | C38  | 1.390(3) |
| C15  | C20  | 1.388(3) | C37  | C42  | 1.385(3) |
| C16  | C17  | 1.382(3) | C38  | C39  | 1.390(3) |
| C17  | C18  | 1.415(3) | C39  | C40  | 1.393(3) |
| C17  | C22  | 1.497(3) | C40  | C41  | 1.412(3) |
| C18  | C19  | 1.401(3) | C41  | C42  | 1.383(3) |
| C19  | C20  | 1.390(3) | C41  | C43  | 1.498(3) |

**Table 9** Bond Angles for **4f**

| Atom | Atom | Atom | Angle/°    | Atom | Atom | Atom | Angle/°    |
|------|------|------|------------|------|------|------|------------|
| C9   | N1   | C7   | 105.44(18) | C23  | N4   | C29  | 105.54(17) |
| C8   | N2   | C9   | 107.73(17) | C27  | N5   | C23  | 122.07(18) |
| C13  | N2   | C8   | 130.5(2)   | C27  | N5   | C28  | 130.57(19) |
| C13  | N2   | C9   | 121.68(19) | C28  | N5   | C23  | 107.35(16) |
| C18  | N3   | C21  | 121.38(18) | C40  | N6   | C44  | 121.32(18) |
| C2   | C1   | C6   | 118.2(2)   | N4   | C23  | N5   | 110.37(17) |
| C2   | C1   | C7   | 120.2(2)   | N4   | C23  | C24  | 131.3(2)   |
| C6   | C1   | C7   | 121.6(2)   | N5   | C23  | C24  | 118.35(19) |
| C3   | C2   | C1   | 121.3(2)   | C25  | C24  | C23  | 119.9(2)   |
| C2   | C3   | C4   | 119.7(2)   | C24  | C25  | C26  | 120.4(2)   |
| C5   | C4   | C3   | 120.0(2)   | C27  | C26  | C25  | 120.5(2)   |
| C4   | C5   | C6   | 120.4(2)   | C26  | C27  | N5   | 118.8(2)   |
| C5   | C6   | C1   | 120.4(2)   | N5   | C28  | C36  | 121.87(18) |
| N1   | C7   | C1   | 119.84(19) | C29  | C28  | N5   | 104.82(17) |
| N1   | C7   | C8   | 111.85(19) | C29  | C28  | C36  | 133.21(19) |
| C8   | C7   | C1   | 128.2(2)   | N4   | C29  | C28  | 111.91(18) |
| C2   | C1   | C7   | 120.2(2)   | N4   | C23  | C24  | 131.3(2)   |
| N2   | C8   | C14  | 120.71(18) | N4   | C29  | C30  | 120.82(18) |
| C7   | C8   | N2   | 104.43(18) | C28  | C29  | C30  | 127.25(18) |
| C7   | C8   | C14  | 134.83(19) | C31  | C30  | C29  | 120.36(19) |
| N1   | C9   | N2   | 110.54(18) | C31  | C30  | C35  | 118.34(19) |
| N1   | C9   | C10  | 130.8(2)   | C35  | C30  | C29  | 121.29(19) |
| N2   | C9   | C10  | 118.7(2)   | C32  | C31  | C30  | 120.6(2)   |
| C11  | C10  | C9   | 119.6(2)   | C33  | C32  | C31  | 120.1(2)   |
| C10  | C11  | C12  | 120.3(2)   | C32  | C33  | C34  | 120.2(2)   |
| C13  | C12  | C11  | 120.9(2)   | C35  | C34  | C33  | 119.5(2)   |
| C12  | C13  | N2   | 118.8(2)   | C34  | C35  | C30  | 121.2(2)   |
| C8   | C14  | C15  | 114.43(17) | C28  | C36  | C37  | 115.65(17) |
| C16  | C15  | C14  | 120.72(18) | C38  | C37  | C36  | 122.43(18) |
| C20  | C15  | C14  | 121.86(18) | C42  | C37  | C36  | 120.16(18) |
| C20  | C15  | C16  | 117.32(19) | C42  | C37  | C38  | 117.23(19) |
| C17  | C16  | C15  | 123.15(19) | C39  | C38  | C37  | 120.85(19) |
| C16  | C17  | C18  | 119.07(19) | C38  | C39  | C40  | 121.54(19) |
| C16  | C17  | C22  | 121.04(18) | N6   | C40  | C39  | 122.60(19) |
| C18  | C17  | C22  | 119.88(19) | N6   | C40  | C41  | 119.43(18) |
| N3   | C18  | C17  | 120.29(18) | C39  | C40  | C41  | 117.91(19) |
| N3   | C18  | C19  | 121.41(18) | C40  | C41  | C43  | 120.10(19) |
| C19  | C18  | C17  | 118.25(18) | C42  | C41  | C40  | 119.07(18) |
| C20  | C19  | C18  | 120.89(19) | C42  | C41  | C43  | 120.83(18) |

C15      C20      C19      121.30(19)      C41      C42      C37      123.32(19)

## 5. References

1. H. Cao, H. Zhan, Y. Lin, X. Lin, Z. Du, H. Jiang, *Org. Lett.* **2012**, *14*, 1688.
2. C. Zhu, G. Xu, J. Sun, *Angew. Chem. Int. Ed.* **2016**, *55*, 11867.
